# Supplementary material
Source: Research Square preprint supplement (doi:10.21203/rs.3.rs-9388494/v1)
Supplement: Supplementary file 1 [file 1b08d9dd65c5688266c69110.xlsx]

## Sheet: Table S6
s	CD70	LGALS9	NRP1	TMIGD2	TNFRSF14	TNFSF15	TNFSF9	riskScore
1 NA	0.426 ****	0.012 ****	0.43 ****	-0.128 ****	-0.086 ****	-0.286 ns	0.352 ns	0.325 ns
0.426 ****	1 NA	0.189 ****	0.361 ****	0.095 ****	0.055 ****	-0.146 ****	0.583 ****	0.14 ****
0.012 ns	0.189 ****	1 NA	0.019 ****	0.268 ns	0.495 ****	0.059 ****	-0.007 ****	-0.133 ****
0.43 ****	0.361 ****	0.019 ****	1 NA	0.017 ****	-0.209 ns	-0.127 ****	0.326 ns	0.23 ns
-0.128 *	0.095 ****	0.268 ns	0.017 ****	1 NA	0.269 ns	0.132 ****	0.017 ****	-0.145 ****
-0.086 ns	0.055 ****	0.495 ****	-0.209 ns	0.269 ns	1 NA	0.232 ns	-0.09 ****	-0.145 ****
-0.286 ****	-0.146 ****	0.059 ****	-0.127 ****	0.132 ****	0.232 ns	1 NA	-0.21 ns	-0.178 ****
0.352 ****	0.583 ****	-0.007 ****	0.326 ns	0.017 ****	-0.09 ****	-0.21 ns	1 NA	0.162 ****
0.325 ****	0.14 ****	-0.133 ****	0.23 ns	-0.145 ****	-0.145 ****	-0.178 ****	0.162 ****	1 NA
