# Supplementary material
Source: Research Square preprint supplement (doi:10.21203/rs.3.rs-9388494/v1)
Supplement: Supplementary file 1 [file e4865b6fcfc9284fe4972e66.docx]

| **Primer** | **Sequence** | |
| --- | --- | --- |
| UGT2B4 F | ATGTGACTGGGTTCCTGCTG | |
| UGT2B4 R | TTGGGTTTCCCAGCTTCCAG | |
| HIST1H1C F | GGAAGCCAAGCCCAAGGTTA |
| HIST1H1C R | GCCTTAGCAGCACTTTTGGC |
| CGB F | CCAGTGGAGCCTCTATCCCT |
| CGB R | CCCTCGCTCCCCTTTTTGAT |
| DSC1 F | TCCCCATGCAGACATCCAAC |
| DSC1 R | TACACCTTTTCGCCAAGCCG |
| SLC13A5 F | CTGGAACCTGCACAAGAGGA |
| SLC13A5 R | GTTGCCGTGTTACGTGCAG |
| Internal reference -GAPDH F | ATGGGCAGCCGTTAGGAAAG |
| Internal reference -GAPDH R | AGGAAAAGCATCACCCGGAG |

**The primer sequences of RT-qPCR analysis**
