# Supplementary material
Source: Research Square preprint supplement (doi:10.21203/rs.3.rs-9388494/v1)
Supplement: Supplementary file 2 [file 2a46f122d660ee067bccf49f.xlsx]

## Sheet: Table S5
ID	Description	setSize	enrichmentScore	NES	pvalue	p.adjust	qvalue	rank	leading_edge	core_enrichment
HALLMARK_EPITHELIAL_MESENCHYMAL_TRANSITION	HALLMARK_EPITHELIAL_MESENCHYMAL_TRANSITION	195	0.717834362691817	2.63041216606579	1e-10	5e-09	3.1578947368421e-09	2288	tags=62%, list=16%, signal=52%	FOXC2/LAMA1/PTHLH/PCOLCE2/MFAP5/LAMA3/SERPINE2/FAP/ITGB3/FBN2/SFRP1/OXTR/LRRC15/NT5E/CRLF1/APLP1/TNC/TGFBI/CDH2/ANPEP/CXCL6/INHBA/MMP3/LAMC2/PRRX1/SNAI2/SCG2/ECM2/GAS1/ADAM12/LOX/TFPI2/RGS4/COL8A2/COL16A1/COL5A3/PMEPA1/FBN1/PDLIM4/GREM1/LAMA2/CTHRC1/VCAN/COL7A1/SGCD/COL5A1/IL6/ITGA2/MATN3/ECM1/POSTN/COL11A1/NOTCH2/SPOCK1/PTX3/GLIPR1/NID2/DST/FSTL3/MMP1/GJA1/CD44/FN1/NTM/THBS2/CDH11/COL12A1/COL5A2…
HALLMARK_G2M_CHECKPOINT	HALLMARK_G2M_CHECKPOINT	188	0.550915096924358	2.0233304679067	1.11962543876009e-08	2.79906359690022e-07	1.7678296401475e-07	4845	tags=59%, list=34%, signal=40%	HOXC10/RASAL2/NOTCH2/MYC/SLC7A1/KIF20B/CDKN3/MT2A/CENPE/CASP8AP2/STAG1/KIF23/HMMR/STIL/E2F2/SMC2/CDC25B/SLC7A5/CENPF/TGFB1/KIF11/KIF4A/INCENP/SMC4/PRMT5/WRN/CCNA2/HIF1A/CHEK1/FANCC/DBF4/PRC1/MKI67/RACGAP1/AMD1/SMC1A/KIF15/FBXO5/MNAT1/CDC20/PLK4/AURKA/EXO1/KIF2C/PTTG1/TTK/PLK1/NUSAP1/TLE3/UCK2/G3BP1/MAPK14/ABL1/MEIS1/ESPL1/CENPA/CUL4A/PBK/CDK1/ARID4A/BARD1/ODC1/NDC80/CCNB2/NEK2/MAD2L1/FOXN3/KATNA1…
HALLMARK_APICAL_JUNCTION	HALLMARK_APICAL_JUNCTION	171	0.489377519142396	1.77640060124841	2.23889824085889e-05	0.000373149706809815	0.000235673499037778	3000	tags=36%, list=21%, signal=29%	PPP2R2C/KRT31/DSC3/ADAM23/CNTN1/LAMA3/SPEG/NFASC/ICAM5/COL17A1/FLNC/TGFBI/LAMC2/CLDN6/COL16A1/EGFR/ALOX15B/FBN1/CDH3/SIRPA/VCAN/CALB2/ITGA2/MMP9/ADAMTS5/NRTN/ACTC1/CDH11/MYH10/LAYN/BMP1/FSCN1/CERCAM/CD209/TRO/LAMB3/MSN/BAIAP2/GNAI1/AKT3/NEGR1/VAV2/SLIT2/ACTN1/SORBS3/JAM3/CLDN8/RASA1/CD274/ADAM9/ITGB1/ITGB4/MAPK11/TNFRSF11B/MMP2/VCL/NEXN/MAPK14/ATP1A3/THY1/PTEN/LIMA1
HALLMARK_E2F_TARGETS	HALLMARK_E2F_TARGETS	195	0.457705599433721	1.67720359988364	5.70288367309108e-05	0.000623591878179193	0.000393847502007911	4292	tags=46%, list=30%, signal=32%	MMS22L/DEPDC1/MYC/BRMS1L/DIAPH3/CDKN3/DLGAP5/CENPE/STAG1/CIT/HMMR/PRKDC/CDC25B/KIF4A/USP1/SMC4/PMS2/BUB1B/NUP205/CHEK1/TRIP13/MKI67/DNMT1/MELK/RACGAP1/RRM2/CTPS1/SMC1A/CDCA8/CDC20/CBX5/POLD2/PLK4/AURKA/DCLRE1B/EIF2S1/MTHFD2/KIF2C/PTTG1/RAD50/PLK1/BRCA1/IPO7/SMC6/SMC3/ESPL1/GINS1/ZW10/SPC25/CDK1/BARD1/ATAD2/RPA1/CCNB2/GINS4/NCAPD2/MAD2L1/UBR7/TIPIN/PDS5B/MCM4/ANP32E/XPO1/TOP2A/POLA2/MCM6/HMGA1/TRA…
HALLMARK_TNFA_SIGNALING_VIA_NFKB	HALLMARK_TNFA_SIGNALING_VIA_NFKB	195	0.456442438541906	1.67257490843306	6.23591878179193e-05	0.000623591878179193	0.000393847502007911	3136	tags=39%, list=22%, signal=31%	SERPINB2/GFPT2/CSF2/TNC/CXCL6/INHBA/TNFAIP6/CXCL3/SPHK1/PMEPA1/SIK1/TNFSF9/IL7R/IL6/EGR3/SLC2A3/PTX3/PDE4B/F3/MYC/SGK1/EGR2/CD44/F2RL1/AREG/FJX1/G0S2/DNAJB4/IRS2/GEM/MSC/OLR1/PLK2/NFIL3/TUBB2A/KLF10/PLAU/PHLDA1/JAG1/CLCF1/KLF4/SERPINE1/PFKFB3/PTPRE/LAMB3/FOSL1/MXD1/CXCL1/HBEGF/KLF9/TLR2/NFAT5/CXCL2/PLAUR/PANX1/LDLR/TNFAIP3/TIPARP/SERPINB8/GPR183/NR4A3/PTGS2/NAMPT/JUN/IFIH1/TNFAIP8/SLC16A6/KYNU/DE…
HALLMARK_MITOTIC_SPINDLE	HALLMARK_MITOTIC_SPINDLE	198	0.457867120386544	1.67824318213328	8.05160683366171e-05	0.000670967236138476	0.000423768780719037	4251	tags=53%, list=29%, signal=38%	CCDC88A/DOCK4/KIF1B/RASAL2/NOTCH2/DST/TUBA4A/FGD6/MYH10/PALLD/OPHN1/ANLN/FSCN1/KIF20B/TRIO/DLGAP5/CENPE/APC/RAPGEF5/KIF23/NIN/CEP72/FLNA/CENPF/KIF11/KIF4A/INCENP/SMC4/MYO1E/ARHGAP5/ITSN1/AKAP13/RICTOR/KLC1/ECT2/PRC1/ROCK1/ALS2/RASA1/TUBGCP5/LATS1/ARHGAP29/RACGAP1/KIFAP3/WASF2/WASF1/SMC1A/KIF15/CLIP1/FBXO5/STK38L/AURKA/ALMS1/KIF2C/BIN1/TTK/DOCK2/PLK1/NUSAP1/VCL/ABL1/SMC3/LLGL1/ESPL1/FGD4/PDLIM5/KI…
HALLMARK_HYPOXIA	HALLMARK_HYPOXIA	176	0.447940087994623	1.6344220625735	0.000284911257972878	0.00203508041409198	0.0012853139457423	2949	tags=38%, list=20%, signal=31%	PKP1/SULT2B1/TMEM45A/SRPX/TGFBI/AK4/PPFIA4/LOX/PGF/EGFR/DTNA/CAV1/CHST3/COL5A1/IL6/RORA/TGFB3/NR3C1/SLC2A3/F3/MT1E/P4HA2/PDK1/KLF7/HAS1/IRS2/MT2A/ADORA2B/NFIL3/PAM/NDRG1/SDC2/MAP3K1/STC2/SLC2A1/SERPINE1/PFKFB3/EXT1/NDST1/EFNA3/TPBG/DPYSL4/DCN/GPC4/PLAUR/GBE1/ADM/PGM1/MXI1/TNFAIP3/FOXO3/GLRX/TIPARP/GPC1/NDST2/CSRP2/PFKP/JUN/STC1/INHA/HOXB9/ZNF292/VLDLR/AMPD3/P4HA1/BHLHE40/ANXA2
HALLMARK_KRAS_SIGNALING_DN	HALLMARK_KRAS_SIGNALING_DN	124	0.487592835240131	1.70473946988204	0.000451466227817421	0.00282166392385888	0.00178210353085824	1453	tags=30%, list=10%, signal=27%	KRT1/KLK7/TENM2/KLK8/CCNA1/LGALS7/ALOX12B/NGB/TGM1/SERPINB2/NUDT11/BMPR1B/TGFB2/EDAR/SHOX2/KRT5/KRT4/PKP1/CALML5/SCGB1A1/CNTFR/CELSR2/CD207/PLAG1/HTR1D/TCF7L1/ATP6V1B1/ACTC1/SGK1/COPZ2/SPTBN2/PTGFR/AKR1B10/CYP39A1/RYR1/CCR8/KCNMB1
HALLMARK_INFLAMMATORY_RESPONSE	HALLMARK_INFLAMMATORY_RESPONSE	180	0.425260388270902	1.55544587695392	0.00152800451338178	0.00848891396323212	0.00536141934519923	2581	tags=36%, list=18%, signal=30%	NOD2/EREG/CCL24/ITGB3/HAS2/CLEC5A/CXCL6/INHBA/TNFAIP6/CD70/ITGB8/SPHK1/OSMR/TNFSF9/IL7R/TLR1/KIF1B/IL6/DCBLD2/NLRP3/CCL7/PDPN/PDE4B/F3/MYC/AXL/CSF3/OSM/SLC7A1/SCN1B/CXCL8/ITGA5/ADORA2B/OLR1/MSR1/FPR1/EMP3/KCNJ2/MET/SERPINE1/PTPRE/GPR132/BDKRB1/MXD1/HBEGF/PCDH7/TPBG/TLR2/SLC31A2/PLAUR/HIF1A/PTGER2/LDLR/IL10/ADM/RNF144B/GNAI3/GPR183/PVR/NAMPT/MMP14/C5AR1/LPAR1/CSF3R
HALLMARK_KRAS_SIGNALING_UP	HALLMARK_KRAS_SIGNALING_UP	184	0.404601749914444	1.48012615988642	0.0040049146760872	0.020024573380436	0.0126470989771175	2349	tags=34%, list=16%, signal=29%	HOXD11/NGF/PPBP/EREG/HKDC1/MMP10/TNNT2/GFPT2/WNT7A/MALL/NAP1L2/RBP4/CSF2/CIDEA/INHBA/PRRX1/ETV1/IL7R/ITGA2/DCBLD2/SPON1/ANKH/MMP9/CA2/SOX9/MMP11/F2RL1/SCN1B/PRDM1/PDCD1LG2/G0S2/ANO1/PLEK2/F13A1/NRP1/SPP1/MMD/CBL/PLAU/EMP1/NIN/KLF4/ADAM17/IL33/MAP3K1/IL1RL2/SPRY2/HBEGF/EPHB2/TFPI/SCG5/PLAUR/CPE/AMMECR1/IGF2/PTCD2/PCP4/TNFAIP3/GLRX/TMEM158/EVI5/CCSER2
HALLMARK_PEROXISOME	HALLMARK_PEROXISOME	94	-0.450464	-1.491	0.00737475071546499	0.0335215941612045	0.021171533154445	3302	tags=34%, list=23%, signal=26%	HSD17B4/ACOT8/GSTK1/ACSL4/CAT/ISOC1/ABCC5/ACSL1/ABCD1/ABCD3/MLYCD/CADM1/HMGCL/SLC25A4/HSD17B11/ACAA1/SLC23A2/DHRS3/CRABP2/ACOX1/IDH1/PEX11A/STS/HSD11B2/ABCB1/SLC27A2/ACSL5/FABP6/CEL/UGT2B17/ALB/TTR
