# Supplementary material
Source: Research Square preprint supplement (doi:10.21203/rs.3.rs-9388494/v1)
Supplement: Supplementary file 3 [file a14fdf890c0407413a03fb6a.xlsx]

## Sheet: GO
	ONTOLOGY	ID	Description	GeneRatio	BgRatio	pvalue	p.adjust	qvalue	geneID	Count	richFactor
GO:0031424	BP	GO:0031424	keratinization	10/188	84/18903	1.08754e-08	2.57638e-05	2.34679e-05	TGM1/CNFN/SPRR2G/SPRR2D/SPRR1B/KRT6C/KRT6B/KRT16/KRT81/SPRR2F	10	0.119048
GO:0008544	BP	GO:0008544	epidermis development	17/188	362/18903	1.34589e-07	0.000108377	9.8719e-05	WNT16/TGM1/CNFN/DKK1/KRT34/SPRR2G/SPRR2D/SPRR1B/BNC1/KRT6C/DSG4/KRT6B/KRT16/KRT14/KRTDAP/KRT81/SPRR2F	17	0.0469613
GO:0030216	BP	GO:0030216	keratinocyte differentiation	12/188	170/18903	1.37243e-07	0.000108377	9.8719e-05	WNT16/TGM1/CNFN/SPRR2G/SPRR2D/SPRR1B/KRT6C/DSG4/KRT6B/KRT16/KRT81/SPRR2F	12	0.0705882
GO:0051346	BP	GO:0051346	negative regulation of hydrolase activity	17/188	373/18903	2.05913e-07	0.000121952	0.000111085	SERPINA4/CST4/KNG1/SERPINC1/APOA1/PI3/VIL1/AHSG/SPINK7/APOA2/FABP1/PTX3/PI16/NLRP7/WFDC12/CST5/SPINK6	17	0.0455764
GO:0010466	BP	GO:0010466	negative regulation of peptidase activity	14/188	263/18903	4.02646e-07	0.000190774	0.000173774	SERPINA4/CST4/KNG1/SERPINC1/PI3/VIL1/AHSG/SPINK7/FABP1/PI16/NLRP7/WFDC12/CST5/SPINK6	14	0.0532319
GO:0010951	BP	GO:0010951	negative regulation of endopeptidase activity	13/188	252/18903	1.50331e-06	0.000593557	0.000540664	SERPINA4/CST4/KNG1/SERPINC1/PI3/VIL1/AHSG/SPINK7/FABP1/NLRP7/WFDC12/CST5/SPINK6	13	0.0515873
GO:0009913	BP	GO:0009913	epidermal cell differentiation	12/188	235/18903	4.26644e-06	0.00144389	0.00131522	WNT16/TGM1/CNFN/SPRR2G/SPRR2D/SPRR1B/KRT6C/DSG4/KRT6B/KRT16/KRT81/SPRR2F	12	0.0510638
GO:0045109	BP	GO:0045109	intermediate filament organization	7/188	69/18903	5.51795e-06	0.001634	0.0014884	KRT34/KRT6C/KRT6B/KRT16/KRT14/KRT81/NEFL	7	0.101449
GO:0043588	BP	GO:0043588	skin development	13/188	302/18903	1.0825e-05	0.00284939	0.00259548	WNT16/TGM1/CNFN/DKK1/SPRR2G/SPRR2D/SPRR1B/KRT6C/DSG4/KRT6B/KRT16/KRT81/SPRR2F	13	0.0430464
GO:0045861	BP	GO:0045861	negative regulation of proteolysis	14/188	352/18903	1.2084e-05	0.0028627	0.0026076	SERPINA4/CST4/KNG1/SERPINC1/PI3/VIL1/AHSG/SPINK7/FABP1/PI16/NLRP7/WFDC12/CST5/SPINK6	14	0.0397727
GO:0007369	BP	GO:0007369	gastrulation	10/188	196/18903	2.75481e-05	0.00584236	0.00532174	COL11A1/FGF8/DKK1/APOA1/HMGA2/OTX2/MESP1/APLN/MESP2/LHX1	10	0.0510204
GO:0045104	BP	GO:0045104	intermediate filament cytoskeleton organization	7/188	89/18903	2.98146e-05	0.00584236	0.00532174	KRT34/KRT6C/KRT6B/KRT16/KRT14/KRT81/NEFL	7	0.0786517
GO:0045103	BP	GO:0045103	intermediate filament-based process	7/188	90/18903	3.20602e-05	0.00584236	0.00532174	KRT34/KRT6C/KRT6B/KRT16/KRT14/KRT81/NEFL	7	0.0777778
GO:0098742	BP	GO:0098742	cell-cell adhesion via plasma-membrane adhesion molecules	11/188	282/18903	0.000125619	0.0212565	0.0193623	PCDHA6/APOA1/LRRC4/DSC2/DSG1/DSC1/MYPN/TENM2/CDH16/DSG4/CLDN6	11	0.0390071
GO:0032525	BP	GO:0032525	somite rostral/caudal axis specification	3/188	11/18903	0.000150631	0.0237896	0.0216697	MESP1/MESP2/LHX1	3	0.272727
GO:0007492	BP	GO:0007492	endoderm development	6/188	83/18903	0.000178727	0.0264628	0.0241046	COL11A1/FGF8/DKK1/HMGA2/MESP1/LHX1	6	0.0722892
GO:0052547	BP	GO:0052547	regulation of peptidase activity	14/188	459/18903	0.000209623	0.0292115	0.0266084	SERPINA4/CST4/KNG1/SERPINC1/PI3/VIL1/AHSG/SPINK7/FABP1/PI16/NLRP7/WFDC12/CST5/SPINK6	14	0.0305011
GO:0019730	BP	GO:0019730	antimicrobial humoral response	7/188	125/18903	0.000255612	0.0336414	0.0306436	PGC/PI3/IL36RN/KLK3/CXCL5/RNASE7/WFDC12	7	0.056
GO:0001706	BP	GO:0001706	endoderm formation	5/188	58/18903	0.0002758	0.0343879	0.0313235	COL11A1/DKK1/HMGA2/MESP1/LHX1	5	0.0862069
GO:0052548	BP	GO:0052548	regulation of endopeptidase activity	13/188	428/18903	0.000367469	0.0418648	0.0381341	SERPINA4/CST4/KNG1/SERPINC1/PI3/VIL1/AHSG/SPINK7/FABP1/NLRP7/WFDC12/CST5/SPINK6	13	0.0303738
GO:0071599	BP	GO:0071599	otic vesicle development	3/188	15/18903	0.000403363	0.0418648	0.0381341	FGF8/PAX8/COL2A1	3	0.2
GO:0008202	BP	GO:0008202	steroid metabolic process	11/188	323/18903	0.000403746	0.0418648	0.0381341	CYP3A43/APOA1/CGA/BAAT/CYP11A1/GC/UGT2B4/APOA2/FGF19/HSD3B1/SRD5A2	11	0.0340557
GO:0019731	BP	GO:0019731	antibacterial humoral response	5/188	63/18903	0.000406454	0.0418648	0.0381341	PGC/PI3/KLK3/RNASE7/WFDC12	5	0.0793651
GO:0007498	BP	GO:0007498	mesoderm development	7/188	136/18903	0.000426959	0.0421444	0.0383888	DLL3/FGF8/DKK1/HMGA2/MESP1/MESP2/LHX1	7	0.0514706
GO:0010092	BP	GO:0010092	specification of animal organ identity	4/188	37/18903	0.000484169	0.0426866	0.0388827	FGF8/DKK1/PAX8/MESP1	4	0.108108
GO:0007586	BP	GO:0007586	digestion	7/188	139/18903	0.000486848	0.0426866	0.0388827	PGC/APOA1/VIL1/CHIA/APOA2/FABP1/MUC13	7	0.0503597
GO:0061101	BP	GO:0061101	neuroendocrine cell differentiation	3/188	16/18903	0.000492822	0.0426866	0.0388827	FGF8/NKX2-2/OTP	3	0.1875
GO:0001756	BP	GO:0001756	somitogenesis	5/188	66/18903	0.000504527	0.0426866	0.0388827	DLL3/DKK1/MESP1/MESP2/LHX1	5	0.0757576
GO:0050892	BP	GO:0050892	intestinal absorption	4/188	42/18903	0.000789404	0.0623366	0.0567817	APOA1/VIL1/APOA2/FABP1	4	0.0952381
GO:0071542	BP	GO:0071542	dopaminergic neuron differentiation	4/188	42/18903	0.000789404	0.0623366	0.0567817	FGF8/DKK1/OTX2/OTP	4	0.0952381
GO:0001502	BP	GO:0001502	cartilage condensation	3/188	19/18903	0.000834234	0.06312	0.0574953	COL11A1/SOX6/COL2A1	3	0.157895
GO:0021761	BP	GO:0021761	limbic system development	6/188	111/18903	0.000852613	0.06312	0.0574953	OTP/CNTNAP2/NHLH2/HSD3B1/NEFL/SRD5A2	6	0.0540541
GO:0021536	BP	GO:0021536	diencephalon development	5/188	76/18903	0.000962842	0.0682797	0.0621952	FGF8/OTP/CNTNAP2/NHLH2/SRD5A2	5	0.0657895
GO:0044344	BP	GO:0044344	cellular response to fibroblast growth factor stimulus	6/188	114/18903	0.000979953	0.0682797	0.0621952	FGF8/FGF5/FGF19/OTX2/APLN/LHX1	6	0.0526316
GO:0003007	BP	GO:0003007	heart morphogenesis	9/188	258/18903	0.00114393	0.0774276	0.0705279	WNT16/COL11A1/FGF8/DKK1/LBX1/COL2A1/ANKRD1/MESP1/MESP2	9	0.0348837
GO:0071774	BP	GO:0071774	response to fibroblast growth factor	6/188	120/18903	0.00127809	0.0808614	0.0736557	FGF8/FGF5/FGF19/OTX2/APLN/LHX1	6	0.05
GO:0023019	BP	GO:0023019	signal transduction involved in regulation of gene expression	3/188	22/18903	0.00129706	0.0808614	0.0736557	FGF8/FGF5/MESP1	3	0.136364
GO:0098743	BP	GO:0098743	cell aggregation	3/188	22/18903	0.00129706	0.0808614	0.0736557	COL11A1/SOX6/COL2A1	3	0.136364
GO:0006869	BP	GO:0006869	lipid transport	12/188	433/18903	0.00135926	0.0825665	0.0752089	SLC10A1/APOA1/LRAT/SLC10A4/APOA2/FGF19/FABP1/FABP7/GALR1/ABCA13/ABCA4/XKR7	12	0.0277136
GO:0035987	BP	GO:0035987	endodermal cell differentiation	4/188	49/18903	0.00141564	0.0826001	0.0752395	COL11A1/DKK1/HMGA2/MESP1	4	0.0816327
GO:0021515	BP	GO:0021515	cell differentiation in spinal cord	4/188	50/18903	0.00152691	0.0826001	0.0752395	SOX6/NKX2-2/LBX1/LHX1	4	0.08
GO:0009952	BP	GO:0009952	anterior/posterior pattern specification	8/188	218/18903	0.00155627	0.0826001	0.0752395	DLL3/FGF8/DKK1/FEZF1/OTX2/MESP1/MESP2/LHX1	8	0.0366972
GO:0007156	BP	GO:0007156	homophilic cell adhesion via plasma membrane adhesion molecules	7/188	170/18903	0.00158558	0.0826001	0.0752395	PCDHA6/DSC2/DSG1/DSC1/MYPN/CDH16/DSG4	7	0.0411765
GO:0030900	BP	GO:0030900	forebrain development	11/188	383/18903	0.00161926	0.0826001	0.0752395	FGF8/DKK1/FEZF1/OTX2/OTP/CNTNAP2/NHLH2/HSD3B1/LHX1/NEFL/SRD5A2	11	0.0287206
GO:0061053	BP	GO:0061053	somite development	5/188	86/18903	0.00167586	0.0826001	0.0752395	DLL3/DKK1/MESP1/MESP2/LHX1	5	0.0581395
GO:0001759	BP	GO:0001759	organ induction	3/188	24/18903	0.00167999	0.0826001	0.0752395	FGF8/DKK1/MESP1	3	0.125
GO:0021871	BP	GO:0021871	forebrain regionalization	3/188	24/18903	0.00167999	0.0826001	0.0752395	FGF8/FEZF1/LHX1	3	0.125
GO:0034587	BP	GO:0034587	piRNA metabolic process	3/188	24/18903	0.00167999	0.0826001	0.0752395	PIWIL1/PNLDC1/TDRD12	3	0.125
GO:0001704	BP	GO:0001704	formation of primary germ layer	6/188	127/18903	0.00170849	0.0826001	0.0752395	COL11A1/DKK1/HMGA2/MESP1/MESP2/LHX1	6	0.0472441
GO:0008543	BP	GO:0008543	fibroblast growth factor receptor signaling pathway	5/188	87/18903	0.00176393	0.0835752	0.0761276	FGF8/FGF5/FGF19/OTX2/APLN	5	0.0574713
GO:2000027	BP	GO:2000027	regulation of animal organ morphogenesis	6/188	129/18903	0.00184959	0.0859152	0.0782591	FGF8/DKK1/PAX8/TNFRSF11B/MESP1/LHX1	6	0.0465116
GO:0021854	BP	GO:0021854	hypothalamus development	3/188	25/18903	0.0018952	0.086341	0.078647	OTP/NHLH2/SRD5A2	3	0.12
GO:0006694	BP	GO:0006694	steroid biosynthetic process	7/188	178/18903	0.00205941	0.0920516	0.0838488	APOA1/CGA/BAAT/CYP11A1/FGF19/HSD3B1/SRD5A2	7	0.0393258
GO:0035270	BP	GO:0035270	endocrine system development	6/188	135/18903	0.00232621	0.102052	0.0929578	FGF8/APOA1/PAX8/NKX2-2/CGA/OTP	6	0.0444444
GO:0030878	BP	GO:0030878	thyroid gland development	3/188	28/18903	0.00264103	0.109923	0.100128	FGF8/PAX8/CGA	3	0.107143
GO:0050996	BP	GO:0050996	positive regulation of lipid catabolic process	3/188	28/18903	0.00264103	0.109923	0.100128	APOA1/APOA2/FABP1	3	0.107143
GO:0009948	BP	GO:0009948	anterior/posterior axis specification	4/188	58/18903	0.00264484	0.109923	0.100128	OTX2/MESP1/MESP2/LHX1	4	0.0689655
GO:0048562	BP	GO:0048562	embryonic organ morphogenesis	9/188	294/18903	0.00278454	0.113047	0.102974	WNT16/COL11A1/MYO3A/FGF8/PAX8/LBX1/COL2A1/MESP1/LHX1	9	0.0306122
GO:0046324	BP	GO:0046324	regulation of glucose import	4/188	59/18903	0.00281545	0.113047	0.102974	FGF19/TERT/ITLN1/OSTN	4	0.0677966
GO:0042445	BP	GO:0042445	hormone metabolic process	8/188	241/18903	0.00290122	0.113494	0.10338	LRAT/PAX8/CGA/CYP11A1/CORIN/UGT2B4/HSD3B1/SRD5A2	8	0.033195
GO:0003156	BP	GO:0003156	regulation of animal organ formation	3/188	29/18903	0.00292439	0.113494	0.10338	FGF8/DKK1/MESP1	3	0.103448
GO:0021510	BP	GO:0021510	spinal cord development	5/188	98/18903	0.0029703	0.113494	0.10338	SOX6/NKX2-2/LBX1/LHX1/NEFL	5	0.0510204
GO:0048839	BP	GO:0048839	inner ear development	7/188	193/18903	0.00323609	0.121687	0.110844	COL11A1/MYO3A/CALB1/FGF8/PAX8/COL2A1/KCNK3	7	0.0362694
GO:0003002	BP	GO:0003002	regionalization	10/188	360/18903	0.00331927	0.121798	0.110944	DLL3/FGF8/DKK1/PAX8/NKX2-2/FEZF1/OTX2/MESP1/MESP2/LHX1	10	0.0277778
GO:0010876	BP	GO:0010876	lipid localization	12/188	483/18903	0.00334185	0.121798	0.110944	SLC10A1/APOA1/LRAT/SLC10A4/APOA2/FGF19/FABP1/FABP7/GALR1/ABCA13/ABCA4/XKR7	12	0.0248447
GO:0015721	BP	GO:0015721	bile acid and bile salt transport	3/188	31/18903	0.00354548	0.125981	0.114755	SLC10A1/SLC10A4/FGF19	3	0.0967742
GO:0042472	BP	GO:0042472	inner ear morphogenesis	5/188	103/18903	0.00367984	0.125981	0.114755	COL11A1/MYO3A/FGF8/PAX8/COL2A1	5	0.0485437
GO:0003338	BP	GO:0003338	metanephros morphogenesis	3/188	32/18903	0.0038839	0.125981	0.114755	CALB1/PAX8/LHX1	3	0.09375
GO:0022600	BP	GO:0022600	digestive system process	5/188	106/18903	0.00415972	0.125981	0.114755	APOA1/VIL1/APOA2/FABP1/MUC13	5	0.0471698
GO:0035282	BP	GO:0035282	segmentation	5/188	106/18903	0.00415972	0.125981	0.114755	DLL3/DKK1/MESP1/MESP2/LHX1	5	0.0471698
GO:0002775	BP	GO:0002775	antimicrobial peptide production	2/188	10/18903	0.00420115	0.125981	0.114755	PGC/KLK3	2	0.2
GO:0003129	BP	GO:0003129	heart induction	2/188	10/18903	0.00420115	0.125981	0.114755	DKK1/MESP1	2	0.2
GO:0006702	BP	GO:0006702	androgen biosynthetic process	2/188	10/18903	0.00420115	0.125981	0.114755	HSD3B1/SRD5A2	2	0.2
GO:0030300	BP	GO:0030300	regulation of intestinal cholesterol absorption	2/188	10/18903	0.00420115	0.125981	0.114755	APOA1/APOA2	2	0.2
GO:0048382	BP	GO:0048382	mesendoderm development	2/188	10/18903	0.00420115	0.125981	0.114755	FGF8/LHX1	2	0.2
GO:0048664	BP	GO:0048664	neuron fate determination	2/188	10/18903	0.00420115	0.125981	0.114755	NKX2-2/LBX1	2	0.2
GO:0090009	BP	GO:0090009	primitive streak formation	2/188	10/18903	0.00420115	0.125981	0.114755	OTX2/LHX1	2	0.2
GO:1905918	BP	GO:1905918	regulation of CoA-transferase activity	2/188	10/18903	0.00420115	0.125981	0.114755	APOA1/APOA2	2	0.2
GO:2000726	BP	GO:2000726	negative regulation of cardiac muscle cell differentiation	2/188	10/18903	0.00420115	0.125981	0.114755	DKK1/SOX6	2	0.2
GO:0048333	BP	GO:0048333	mesodermal cell differentiation	3/188	34/18903	0.00461813	0.131358	0.119652	DKK1/HMGA2/MESP1	3	0.0882353
GO:0060563	BP	GO:0060563	neuroepithelial cell differentiation	3/188	34/18903	0.00461813	0.131358	0.119652	FGF8/NKX2-2/OTP	3	0.0882353
GO:0110110	BP	GO:0110110	positive regulation of animal organ morphogenesis	3/188	34/18903	0.00461813	0.131358	0.119652	FGF8/DKK1/MESP1	3	0.0882353
GO:0007218	BP	GO:0007218	neuropeptide signaling pathway	5/188	110/18903	0.00486698	0.131358	0.119652	PPY/NTS/ADCYAP1/GALR1/QRFPR	5	0.0454545
GO:0045229	BP	GO:0045229	external encapsulating structure organization	9/188	321/18903	0.00494506	0.131358	0.119652	COL11A1/TGM1/LAMA1/COL10A1/ADAMTS14/COL2A1/PTX3/TNFRSF11B/C6orf15	9	0.0280374
GO:0030858	BP	GO:0030858	positive regulation of epithelial cell differentiation	4/188	69/18903	0.00495262	0.131358	0.119652	PAX8/NKX2-2/MESP1/LHX1	4	0.057971
GO:0048645	BP	GO:0048645	animal organ formation	4/188	69/18903	0.00495262	0.131358	0.119652	FGF8/DKK1/PAX8/MESP1	4	0.057971
GO:0031128	BP	GO:0031128	developmental induction	3/188	35/18903	0.00501453	0.131358	0.119652	FGF8/DKK1/MESP1	3	0.0857143
GO:0002759	BP	GO:0002759	regulation of antimicrobial humoral response	2/188	11/18903	0.00510127	0.131358	0.119652	PGC/KLK3	2	0.181818
GO:0042487	BP	GO:0042487	regulation of odontogenesis of dentin-containing tooth	2/188	11/18903	0.00510127	0.131358	0.119652	FGF8/TNFRSF11B	2	0.181818
GO:0072205	BP	GO:0072205	metanephric collecting duct development	2/188	11/18903	0.00510127	0.131358	0.119652	CALB1/PAX8	2	0.181818
GO:1904729	BP	GO:1904729	regulation of intestinal lipid absorption	2/188	11/18903	0.00510127	0.131358	0.119652	APOA1/APOA2	2	0.181818
GO:2000826	BP	GO:2000826	regulation of heart morphogenesis	2/188	11/18903	0.00510127	0.131358	0.119652	DKK1/MESP1	2	0.181818
GO:0007605	BP	GO:0007605	sensory perception of sound	6/188	159/18903	0.00519913	0.132438	0.120636	COL11A1/MYO3A/COL2A1/TMPRSS3/CLRN3/CEACAM16	6	0.0377358
GO:0018149	BP	GO:0018149	peptide cross-linking	3/188	36/18903	0.00543084	0.135919	0.123807	TGM1/PI3/SPRR1B	3	0.0833333
GO:0042303	BP	GO:0042303	molting cycle	5/188	115/18903	0.00586616	0.135919	0.123807	DKK1/TERT/DSG4/KRT16/KRT14	5	0.0434783
GO:0042633	BP	GO:0042633	hair cycle	5/188	115/18903	0.00586616	0.135919	0.123807	DKK1/TERT/DSG4/KRT16/KRT14	5	0.0434783
GO:0046326	BP	GO:0046326	positive regulation of glucose import	3/188	37/18903	0.00586731	0.135919	0.123807	FGF19/TERT/ITLN1	3	0.0810811
GO:0090596	BP	GO:0090596	sensory organ morphogenesis	8/188	272/18903	0.00598062	0.135919	0.123807	WNT16/COL11A1/MYO3A/CALB1/FGF8/PAX8/COL2A1/LHX1	8	0.0294118
GO:0003306	BP	GO:0003306	Wnt signaling pathway involved in heart development	2/188	12/18903	0.00608164	0.135919	0.123807	DKK1/MESP1	2	0.166667
GO:0010454	BP	GO:0010454	negative regulation of cell fate commitment	2/188	12/18903	0.00608164	0.135919	0.123807	DKK1/MESP1	2	0.166667
GO:0021979	BP	GO:0021979	hypothalamus cell differentiation	2/188	12/18903	0.00608164	0.135919	0.123807	OTP/NHLH2	2	0.166667
GO:0034370	BP	GO:0034370	triglyceride-rich lipoprotein particle remodeling	2/188	12/18903	0.00608164	0.135919	0.123807	APOA1/APOA2	2	0.166667
GO:0034372	BP	GO:0034372	very-low-density lipoprotein particle remodeling	2/188	12/18903	0.00608164	0.135919	0.123807	APOA1/APOA2	2	0.166667
GO:0046415	BP	GO:0046415	urate metabolic process	2/188	12/18903	0.00608164	0.135919	0.123807	GCKR/SLC22A11	2	0.166667
GO:0072017	BP	GO:0072017	distal tubule development	2/188	12/18903	0.00608164	0.135919	0.123807	CALB1/PAX8	2	0.166667
GO:0072182	BP	GO:0072182	regulation of nephron tubule epithelial cell differentiation	2/188	12/18903	0.00608164	0.135919	0.123807	PAX8/LHX1	2	0.166667
GO:0001707	BP	GO:0001707	mesoderm formation	4/188	74/18903	0.00634412	0.139159	0.126759	DKK1/HMGA2/MESP1/MESP2	4	0.0540541
GO:0050766	BP	GO:0050766	positive regulation of phagocytosis	4/188	74/18903	0.00634412	0.139159	0.126759	APOA1/AHSG/APOA2/PTX3	4	0.0540541
GO:0046323	BP	GO:0046323	glucose import	4/188	75/18903	0.00665045	0.144541	0.13166	FGF19/TERT/ITLN1/OSTN	4	0.0533333
GO:0043583	BP	GO:0043583	ear development	7/188	221/18903	0.00672872	0.144912	0.131999	COL11A1/MYO3A/CALB1/FGF8/PAX8/COL2A1/KCNK3	7	0.0316742
GO:0030279	BP	GO:0030279	negative regulation of ossification	3/188	39/18903	0.00680173	0.145165	0.132229	DKK1/AHSG/SOST	3	0.0769231
GO:0048332	BP	GO:0048332	mesoderm morphogenesis	4/188	76/18903	0.00696643	0.145829	0.132834	DKK1/HMGA2/MESP1/MESP2	4	0.0526316
GO:0007501	BP	GO:0007501	mesodermal cell fate specification	2/188	13/18903	0.00714062	0.145829	0.132834	DKK1/MESP1	2	0.153846
GO:0032536	BP	GO:0032536	regulation of cell projection size	2/188	13/18903	0.00714062	0.145829	0.132834	VIL1/NEFL	2	0.153846
GO:0033700	BP	GO:0033700	phospholipid efflux	2/188	13/18903	0.00714062	0.145829	0.132834	APOA1/APOA2	2	0.153846
GO:1904478	BP	GO:1904478	regulation of intestinal absorption	2/188	13/18903	0.00714062	0.145829	0.132834	APOA1/APOA2	2	0.153846
GO:0010827	BP	GO:0010827	regulation of glucose transmembrane transport	4/188	77/18903	0.00729218	0.14656	0.1335	FGF19/TERT/ITLN1/OSTN	4	0.0519481
GO:0051154	BP	GO:0051154	negative regulation of striated muscle cell differentiation	3/188	40/18903	0.00730015	0.14656	0.1335	DKK1/SOX6/PI16	3	0.075
GO:0007389	BP	GO:0007389	pattern specification process	11/188	472/18903	0.00777414	0.154373	0.140617	DLL3/FGF8/DKK1/PAX8/NKX2-2/FEZF1/LBX1/OTX2/MESP1/MESP2/LHX1	11	0.0233051
GO:0120178	BP	GO:0120178	steroid hormone biosynthetic process	3/188	41/18903	0.00781966	0.154373	0.140617	CYP11A1/HSD3B1/SRD5A2	3	0.0731707
GO:0042471	BP	GO:0042471	ear morphogenesis	5/188	124/18903	0.0080147	0.156857	0.142879	COL11A1/MYO3A/FGF8/PAX8/COL2A1	5	0.0403226
GO:0018158	BP	GO:0018158	protein oxidation	2/188	14/18903	0.00827654	0.156857	0.142879	APOA1/APOA2	2	0.142857
GO:0018206	BP	GO:0018206	peptidyl-methionine modification	2/188	14/18903	0.00827654	0.156857	0.142879	APOA1/APOA2	2	0.142857
GO:0072160	BP	GO:0072160	nephron tubule epithelial cell differentiation	2/188	14/18903	0.00827654	0.156857	0.142879	PAX8/LHX1	2	0.142857
GO:1905208	BP	GO:1905208	negative regulation of cardiocyte differentiation	2/188	14/18903	0.00827654	0.156857	0.142879	DKK1/SOX6	2	0.142857
GO:0061844	BP	GO:0061844	antimicrobial humoral immune response mediated by antimicrobial peptide	4/188	81/18903	0.0086953	0.163197	0.148654	PGC/KLK3/CXCL5/RNASE7	4	0.0493827
GO:0071772	BP	GO:0071772	response to BMP	6/188	178/18903	0.00886854	0.163197	0.148654	DKK1/COL2A1/SLC39A5/SOST/DSG4/RGMA	6	0.0337079
GO:0071773	BP	GO:0071773	cellular response to BMP stimulus	6/188	178/18903	0.00886854	0.163197	0.148654	DKK1/COL2A1/SLC39A5/SOST/DSG4/RGMA	6	0.0337079
GO:0015850	BP	GO:0015850	organic hydroxy compound transport	8/188	292/18903	0.00900032	0.163197	0.148654	SLC10A1/APOA1/SLC10A4/APOA2/FGF19/GALR1/ABCA13/ABCA4	8	0.0273973
GO:0050954	BP	GO:0050954	sensory perception of mechanical stimulus	6/188	180/18903	0.00934064	0.163197	0.148654	COL11A1/MYO3A/COL2A1/TMPRSS3/CLRN3/CEACAM16	6	0.0333333
GO:0001711	BP	GO:0001711	endodermal cell fate commitment	2/188	15/18903	0.0094878	0.163197	0.148654	DKK1/MESP1	2	0.133333
GO:0034380	BP	GO:0034380	high-density lipoprotein particle assembly	2/188	15/18903	0.0094878	0.163197	0.148654	APOA1/APOA2	2	0.133333
GO:0034384	BP	GO:0034384	high-density lipoprotein particle clearance	2/188	15/18903	0.0094878	0.163197	0.148654	APOA1/APOA2	2	0.133333
GO:0072283	BP	GO:0072283	metanephric renal vesicle morphogenesis	2/188	15/18903	0.0094878	0.163197	0.148654	PAX8/LHX1	2	0.133333
GO:1900426	BP	GO:1900426	positive regulation of defense response to bacterium	2/188	15/18903	0.0094878	0.163197	0.148654	PGC/KLK3	2	0.133333
GO:0000578	BP	GO:0000578	embryonic axis specification	3/188	44/18903	0.0095066	0.163197	0.148654	MESP1/MESP2/LHX1	3	0.0681818
GO:0001709	BP	GO:0001709	cell fate determination	3/188	44/18903	0.0095066	0.163197	0.148654	NKX2-2/LBX1/MESP1	3	0.0681818
GO:0010828	BP	GO:0010828	positive regulation of glucose transmembrane transport	3/188	44/18903	0.0095066	0.163197	0.148654	FGF19/TERT/ITLN1	3	0.0681818
GO:0006775	BP	GO:0006775	fat-soluble vitamin metabolic process	3/188	45/18903	0.0101123	0.172346	0.156988	LRAT/CYP11A1/GC	3	0.0666667
GO:0048738	BP	GO:0048738	cardiac muscle tissue development	7/188	241/18903	0.0105581	0.1748	0.159223	COL11A1/FGF8/DKK1/SOX6/ANKRD1/PI16/MESP1	7	0.0290456
GO:0021517	BP	GO:0021517	ventral spinal cord development	3/188	46/18903	0.01074	0.1748	0.159223	NKX2-2/LBX1/LHX1	3	0.0652174
GO:0048806	BP	GO:0048806	genitalia development	3/188	46/18903	0.01074	0.1748	0.159223	FGF8/LHX1/SRD5A2	3	0.0652174
GO:0034375	BP	GO:0034375	high-density lipoprotein particle remodeling	2/188	16/18903	0.0107728	0.1748	0.159223	APOA1/APOA2	2	0.125
GO:0060911	BP	GO:0060911	cardiac cell fate commitment	2/188	16/18903	0.0107728	0.1748	0.159223	DKK1/MESP1	2	0.125
GO:0072044	BP	GO:0072044	collecting duct development	2/188	16/18903	0.0107728	0.1748	0.159223	CALB1/PAX8	2	0.125
GO:2000696	BP	GO:2000696	regulation of epithelial cell differentiation involved in kidney development	2/188	16/18903	0.0107728	0.1748	0.159223	PAX8/LHX1	2	0.125
GO:0022412	BP	GO:0022412	cellular process involved in reproduction in multicellular organism	10/188	430/18903	0.011092	0.178755	0.162826	ROPN1/PAEP/CTCFL/PIWIL1/LIN28A/CGA/STRA8/PTX3/BNC1/TDRD12	10	0.0232558
GO:0002701	BP	GO:0002701	negative regulation of production of molecular mediator of immune response	3/188	47/18903	0.0113897	0.181089	0.164952	APOA1/APOA2/FCRL3	3	0.0638298
GO:0051180	BP	GO:0051180	vitamin transport	3/188	47/18903	0.0113897	0.181089	0.164952	APOA1/TCN1/GC	3	0.0638298
GO:0032370	BP	GO:0032370	positive regulation of lipid transport	4/188	88/18903	0.0115538	0.182473	0.166212	APOA1/LRAT/GALR1/ABCA13	4	0.0454545
GO:0010470	BP	GO:0010470	regulation of gastrulation	2/188	17/18903	0.01213	0.186597	0.169969	OTX2/LHX1	2	0.117647
GO:0042481	BP	GO:0042481	regulation of odontogenesis	2/188	17/18903	0.01213	0.186597	0.169969	FGF8/TNFRSF11B	2	0.117647
GO:0051412	BP	GO:0051412	response to corticosterone	2/188	17/18903	0.01213	0.186597	0.169969	HSD3B1/NEFL	2	0.117647
GO:0090399	BP	GO:0090399	replicative senescence	2/188	17/18903	0.01213	0.186597	0.169969	WNT16/TERT	2	0.117647
GO:0031099	BP	GO:0031099	regeneration	6/188	192/18903	0.0125568	0.191917	0.174815	LGR6/BAAT/APOA2/TM4SF4/RGMA/NEFL	6	0.03125
GO:2000117	BP	GO:2000117	negative regulation of cysteine-type endopeptidase activity	4/188	91/18903	0.0129433	0.195843	0.178391	CST4/VIL1/FABP1/CST5	4	0.043956
GO:0001656	BP	GO:0001656	metanephros development	4/188	92/18903	0.013429	0.195843	0.178391	CALB1/FGF8/PAX8/LHX1	4	0.0434783
GO:0034754	BP	GO:0034754	cellular hormone metabolic process	5/188	141/18903	0.0134593	0.195843	0.178391	LRAT/CYP11A1/UGT2B4/HSD3B1/SRD5A2	5	0.035461
GO:0090102	BP	GO:0090102	cochlea development	3/188	50/18903	0.0134727	0.195843	0.178391	MYO3A/CALB1/KCNK3	3	0.06
GO:0001710	BP	GO:0001710	mesodermal cell fate commitment	2/188	18/18903	0.0135578	0.195843	0.178391	DKK1/MESP1	2	0.111111
GO:0003128	BP	GO:0003128	heart field specification	2/188	18/18903	0.0135578	0.195843	0.178391	DKK1/MESP1	2	0.111111
GO:0030540	BP	GO:0030540	female genitalia development	2/188	18/18903	0.0135578	0.195843	0.178391	LHX1/SRD5A2	2	0.111111
GO:0072077	BP	GO:0072077	renal vesicle morphogenesis	2/188	18/18903	0.0135578	0.195843	0.178391	PAX8/LHX1	2	0.111111
GO:0090190	BP	GO:0090190	positive regulation of branching involved in ureteric bud morphogenesis	2/188	18/18903	0.0135578	0.195843	0.178391	PAX8/LHX1	2	0.111111
GO:0045666	BP	GO:0045666	positive regulation of neuron differentiation	4/188	93/18903	0.0139263	0.199948	0.18213	DKK1/NKX2-2/FEZF1/LIN28A	4	0.0430108
GO:0021537	BP	GO:0021537	telencephalon development	7/188	255/18903	0.014049	0.200495	0.182628	FGF8/FEZF1/CNTNAP2/HSD3B1/LHX1/NEFL/SRD5A2	7	0.027451
GO:0048704	BP	GO:0048704	embryonic skeletal system morphogenesis	4/188	94/18903	0.0144351	0.204101	0.185913	COL11A1/FGF8/COL2A1/LHX1	4	0.0425532
GO:0030198	BP	GO:0030198	extracellular matrix organization	8/188	318/18903	0.014474	0.204101	0.185913	COL11A1/LAMA1/COL10A1/ADAMTS14/COL2A1/PTX3/TNFRSF11B/C6orf15	8	0.0251572
GO:0014706	BP	GO:0014706	striated muscle tissue development	7/188	257/18903	0.0146078	0.204769	0.186522	COL11A1/FGF8/DKK1/SOX6/ANKRD1/PI16/MESP1	7	0.0272374
GO:0043062	BP	GO:0043062	extracellular structure organization	8/188	319/18903	0.0147241	0.205185	0.186901	COL11A1/LAMA1/COL10A1/ADAMTS14/COL2A1/PTX3/TNFRSF11B/C6orf15	8	0.0250784
GO:0006959	BP	GO:0006959	humoral immune response	8/188	320/18903	0.0149774	0.206153	0.187782	PGC/PI3/IL36RN/KLK3/IFNK/CXCL5/RNASE7/WFDC12	8	0.025
GO:0030299	BP	GO:0030299	intestinal cholesterol absorption	2/188	19/18903	0.0150546	0.206153	0.187782	APOA1/APOA2	2	0.105263
GO:0072087	BP	GO:0072087	renal vesicle development	2/188	19/18903	0.0150546	0.206153	0.187782	PAX8/LHX1	2	0.105263
GO:0009798	BP	GO:0009798	axis specification	4/188	96/18903	0.0154877	0.208467	0.18989	OTX2/MESP1/MESP2/LHX1	4	0.0416667
GO:0051153	BP	GO:0051153	regulation of striated muscle cell differentiation	4/188	96/18903	0.0154877	0.208467	0.18989	DKK1/SOX6/PI16/MESP1	4	0.0416667
GO:0072080	BP	GO:0072080	nephron tubule development	4/188	96/18903	0.0154877	0.208467	0.18989	CALB1/FGF8/PAX8/LHX1	4	0.0416667
GO:0001657	BP	GO:0001657	ureteric bud development	4/188	97/18903	0.0160316	0.213364	0.194351	CALB1/FGF8/PAX8/LHX1	4	0.0412371
GO:0060993	BP	GO:0060993	kidney morphogenesis	4/188	97/18903	0.0160316	0.213364	0.194351	CALB1/FGF8/PAX8/LHX1	4	0.0412371
GO:0072163	BP	GO:0072163	mesonephric epithelium development	4/188	98/18903	0.0165874	0.213971	0.194904	CALB1/FGF8/PAX8/LHX1	4	0.0408163
GO:0072164	BP	GO:0072164	mesonephric tubule development	4/188	98/18903	0.0165874	0.213971	0.194904	CALB1/FGF8/PAX8/LHX1	4	0.0408163
GO:0042359	BP	GO:0042359	vitamin D metabolic process	2/188	20/18903	0.0166191	0.213971	0.194904	CYP11A1/GC	2	0.1
GO:0043046	BP	GO:0043046	DNA methylation involved in gamete generation	2/188	20/18903	0.0166191	0.213971	0.194904	CTCFL/TDRD12	2	0.1
GO:0043691	BP	GO:0043691	reverse cholesterol transport	2/188	20/18903	0.0166191	0.213971	0.194904	APOA1/APOA2	2	0.1
GO:0072234	BP	GO:0072234	metanephric nephron tubule development	2/188	20/18903	0.0166191	0.213971	0.194904	CALB1/PAX8	2	0.1
GO:0061326	BP	GO:0061326	renal tubule development	4/188	99/18903	0.0171551	0.219678	0.200102	CALB1/FGF8/PAX8/LHX1	4	0.040404
GO:0055078	BP	GO:0055078	sodium ion homeostasis	3/188	55/18903	0.0173961	0.220382	0.200744	ATP12A/CORIN/TMPRSS3	3	0.0545455
GO:2000648	BP	GO:2000648	positive regulation of stem cell proliferation	3/188	55/18903	0.0173961	0.220382	0.200744	FGF8/HMGA2/TERT	3	0.0545455
GO:0046718	BP	GO:0046718	viral entry into host cell	5/188	151/18903	0.0176114	0.220579	0.200923	SLC10A1/HAVCR1/PTX3/TRIML2/CLDN6	5	0.0331126
GO:0042908	BP	GO:0042908	xenobiotic transport	3/188	56/18903	0.0182492	0.220579	0.200923	SLC28A2/PDZK1/SLC47A2	3	0.0535714
GO:0045761	BP	GO:0045761	regulation of adenylate cyclase activity	3/188	56/18903	0.0182492	0.220579	0.200923	ADCYAP1/GALR1/GRM3	3	0.0535714
GO:0006590	BP	GO:0006590	thyroid hormone generation	2/188	21/18903	0.0182497	0.220579	0.200923	PAX8/CGA	2	0.0952381
GO:0007194	BP	GO:0007194	negative regulation of adenylate cyclase activity	2/188	21/18903	0.0182497	0.220579	0.200923	GALR1/GRM3	2	0.0952381
GO:0060445	BP	GO:0060445	branching involved in salivary gland morphogenesis	2/188	21/18903	0.0182497	0.220579	0.200923	LAMA1/FGF8	2	0.0952381
GO:0090189	BP	GO:0090189	regulation of branching involved in ureteric bud morphogenesis	2/188	21/18903	0.0182497	0.220579	0.200923	PAX8/LHX1	2	0.0952381
GO:1903429	BP	GO:1903429	regulation of cell maturation	2/188	21/18903	0.0182497	0.220579	0.200923	PAEP/BNC1	2	0.0952381
GO:2000725	BP	GO:2000725	regulation of cardiac muscle cell differentiation	2/188	21/18903	0.0182497	0.220579	0.200923	DKK1/SOX6	2	0.0952381
GO:0001823	BP	GO:0001823	mesonephros development	4/188	102/18903	0.0189307	0.227649	0.207363	CALB1/FGF8/PAX8/LHX1	4	0.0392157
GO:0016052	BP	GO:0016052	carbohydrate catabolic process	5/188	155/18903	0.0194855	0.231533	0.210901	MIOX/GAPDHS/CHIA/ALDOB/HKDC1	5	0.0322581
GO:0032368	BP	GO:0032368	regulation of lipid transport	5/188	155/18903	0.0194855	0.231533	0.210901	APOA1/LRAT/APOA2/GALR1/ABCA13	5	0.0322581
GO:0050764	BP	GO:0050764	regulation of phagocytosis	4/188	103/18903	0.0195469	0.231533	0.210901	APOA1/AHSG/APOA2/PTX3	4	0.038835
GO:0006883	BP	GO:0006883	cellular sodium ion homeostasis	2/188	22/18903	0.019945	0.231949	0.21128	ATP12A/TMPRSS3	2	0.0909091
GO:0007398	BP	GO:0007398	ectoderm development	2/188	22/18903	0.019945	0.231949	0.21128	KRT6B/LHX1	2	0.0909091
GO:1900424	BP	GO:1900424	regulation of defense response to bacterium	2/188	22/18903	0.019945	0.231949	0.21128	PGC/KLK3	2	0.0909091
GO:0008643	BP	GO:0008643	carbohydrate transport	5/188	156/18903	0.0199736	0.231949	0.21128	VIL1/FGF19/TERT/ITLN1/OSTN	5	0.0320513
GO:0015914	BP	GO:0015914	phospholipid transport	4/188	104/18903	0.0201754	0.233148	0.212372	APOA1/APOA2/ABCA4/XKR7	4	0.0384615
GO:0002090	BP	GO:0002090	regulation of receptor internalization	3/188	59/18903	0.020946	0.240034	0.218645	DKK1/LRRTM1/APLN	3	0.0508475
GO:0044409	BP	GO:0044409	entry into host	5/188	158/18903	0.0209739	0.240034	0.218645	SLC10A1/HAVCR1/PTX3/TRIML2/CLDN6	5	0.0316456
GO:0040019	BP	GO:0040019	positive regulation of embryonic development	2/188	23/18903	0.0217035	0.242526	0.220914	OTX2/LHX1	2	0.0869565
GO:0044241	BP	GO:0044241	lipid digestion	2/188	23/18903	0.0217035	0.242526	0.220914	APOA1/APOA2	2	0.0869565
GO:0072170	BP	GO:0072170	metanephric tubule development	2/188	23/18903	0.0217035	0.242526	0.220914	CALB1/PAX8	2	0.0869565
GO:0072243	BP	GO:0072243	metanephric nephron epithelium development	2/188	23/18903	0.0217035	0.242526	0.220914	CALB1/PAX8	2	0.0869565
GO:0098856	BP	GO:0098856	intestinal lipid absorption	2/188	23/18903	0.0217035	0.242526	0.220914	APOA1/APOA2	2	0.0869565
GO:0001658	BP	GO:0001658	branching involved in ureteric bud morphogenesis	3/188	60/18903	0.0218909	0.243472	0.221776	FGF8/PAX8/LHX1	3	0.05
GO:0051147	BP	GO:0051147	regulation of muscle cell differentiation	5/188	160/18903	0.0220063	0.243612	0.221903	LAMA1/DKK1/SOX6/PI16/MESP1	5	0.03125
GO:0007601	BP	GO:0007601	visual perception	6/188	220/18903	0.0229328	0.252138	0.229669	COL11A1/MYO3A/LRAT/COL2A1/CRYBA2/ABCA4	6	0.0272727
GO:0045165	BP	GO:0045165	cell fate commitment	7/188	282/18903	0.0229893	0.252138	0.229669	WNT16/FGF8/DKK1/SOX6/NKX2-2/LBX1/MESP1	7	0.0248227
GO:0002922	BP	GO:0002922	positive regulation of humoral immune response	2/188	24/18903	0.0235238	0.253309	0.230736	PGC/KLK3	2	0.0833333
GO:0030539	BP	GO:0030539	male genitalia development	2/188	24/18903	0.0235238	0.253309	0.230736	FGF8/SRD5A2	2	0.0833333
GO:0031280	BP	GO:0031280	negative regulation of cyclase activity	2/188	24/18903	0.0235238	0.253309	0.230736	GALR1/GRM3	2	0.0833333
GO:1990961	BP	GO:1990961	xenobiotic detoxification by transmembrane export across the plasma membrane	2/188	24/18903	0.0235238	0.253309	0.230736	PDZK1/SLC47A2	2	0.0833333
GO:0071222	BP	GO:0071222	cellular response to lipopolysaccharide	6/188	222/18903	0.0238431	0.255585	0.23281	CSF3/IL36G/IL36RN/ANKRD1/CXCL5/NLRP7	6	0.027027
GO:0050953	BP	GO:0050953	sensory perception of light stimulus	6/188	224/18903	0.0247775	0.264132	0.240595	COL11A1/MYO3A/LRAT/COL2A1/CRYBA2/ABCA4	6	0.0267857
GO:0050994	BP	GO:0050994	regulation of lipid catabolic process	3/188	63/18903	0.0248634	0.264132	0.240595	APOA1/APOA2/FABP1	3	0.047619
GO:0008211	BP	GO:0008211	glucocorticoid metabolic process	2/188	25/18903	0.0254045	0.266298	0.242568	APOA1/CYP11A1	2	0.08
GO:0042659	BP	GO:0042659	regulation of cell fate specification	2/188	25/18903	0.0254045	0.266298	0.242568	DKK1/MESP1	2	0.08
GO:0072273	BP	GO:0072273	metanephric nephron morphogenesis	2/188	25/18903	0.0254045	0.266298	0.242568	PAX8/LHX1	2	0.08
GO:0030509	BP	GO:0030509	BMP signaling pathway	5/188	167/18903	0.025878	0.267937	0.244061	DKK1/SLC39A5/SOST/DSG4/RGMA	5	0.0299401
GO:0001947	BP	GO:0001947	heart looping	3/188	64/18903	0.0259002	0.267937	0.244061	FGF8/LBX1/MESP1	3	0.046875
GO:0030199	BP	GO:0030199	collagen fibril organization	3/188	64/18903	0.0259002	0.267937	0.244061	COL11A1/ADAMTS14/COL2A1	3	0.046875
GO:1904659	BP	GO:1904659	glucose transmembrane transport	4/188	113/18903	0.0263929	0.27067	0.246551	FGF19/TERT/ITLN1/OSTN	4	0.0353982
GO:1905954	BP	GO:1905954	positive regulation of lipid localization	4/188	113/18903	0.0263929	0.27067	0.246551	APOA1/LRAT/GALR1/ABCA13	4	0.0353982
GO:0002062	BP	GO:0002062	chondrocyte differentiation	4/188	114/18903	0.027147	0.27218	0.247925	COL11A1/SOX6/COL2A1/HMGA2	4	0.0350877
GO:0010842	BP	GO:0010842	retina layer formation	2/188	26/18903	0.0273444	0.27218	0.247925	CALB1/LHX1	2	0.0769231
GO:0034377	BP	GO:0034377	plasma lipoprotein particle assembly	2/188	26/18903	0.0273444	0.27218	0.247925	APOA1/APOA2	2	0.0769231
GO:0046339	BP	GO:0046339	diacylglycerol metabolic process	2/188	26/18903	0.0273444	0.27218	0.247925	APOA2/DGKK	2	0.0769231
GO:0051016	BP	GO:0051016	barbed-end actin filament capping	2/188	26/18903	0.0273444	0.27218	0.247925	ADD2/VIL1	2	0.0769231
GO:1903798	BP	GO:1903798	regulation of miRNA maturation	2/188	26/18903	0.0273444	0.27218	0.247925	LIN28A/TERT	2	0.0769231
GO:2000773	BP	GO:2000773	negative regulation of cellular senescence	2/188	26/18903	0.0273444	0.27218	0.247925	HMGA2/TERT	2	0.0769231
GO:0035637	BP	GO:0035637	multicellular organismal signaling	5/188	170/18903	0.0276625	0.274195	0.249761	DSC2/CORIN/SCN11A/KCNH6/CNTNAP2	5	0.0294118
GO:0060675	BP	GO:0060675	ureteric bud morphogenesis	3/188	66/18903	0.0280425	0.276803	0.252137	FGF8/PAX8/LHX1	3	0.0454545
GO:0008645	BP	GO:0008645	hexose transmembrane transport	4/188	116/18903	0.0286936	0.27916	0.254284	FGF19/TERT/ITLN1/OSTN	4	0.0344828
GO:0072009	BP	GO:0072009	nephron epithelium development	4/188	116/18903	0.0286936	0.27916	0.254284	CALB1/FGF8/PAX8/LHX1	4	0.0344828
GO:0009620	BP	GO:0009620	response to fungus	3/188	67/18903	0.029148	0.27916	0.254284	IL36RN/PTX3/RNASE7	3	0.0447761
GO:0072171	BP	GO:0072171	mesonephric tubule morphogenesis	3/188	67/18903	0.029148	0.27916	0.254284	FGF8/PAX8/LHX1	3	0.0447761
GO:0021544	BP	GO:0021544	subpallium development	2/188	27/18903	0.0293419	0.27916	0.254284	FGF8/CNTNAP2	2	0.0740741
GO:0042403	BP	GO:0042403	thyroid hormone metabolic process	2/188	27/18903	0.0293419	0.27916	0.254284	PAX8/CGA	2	0.0740741
GO:0046618	BP	GO:0046618	xenobiotic export from cell	2/188	27/18903	0.0293419	0.27916	0.254284	PDZK1/SLC47A2	2	0.0740741
GO:0051350	BP	GO:0051350	negative regulation of lyase activity	2/188	27/18903	0.0293419	0.27916	0.254284	GALR1/GRM3	2	0.0740741
GO:0072207	BP	GO:0072207	metanephric epithelium development	2/188	27/18903	0.0293419	0.27916	0.254284	CALB1/PAX8	2	0.0740741
GO:0071219	BP	GO:0071219	cellular response to molecule of bacterial origin	6/188	234/18903	0.0298165	0.282541	0.257363	CSF3/IL36G/IL36RN/ANKRD1/CXCL5/NLRP7	6	0.025641
GO:0021543	BP	GO:0021543	pallium development	5/188	174/18903	0.0301611	0.283496	0.258234	FGF8/CNTNAP2/HSD3B1/NEFL/SRD5A2	5	0.0287356
GO:0021953	BP	GO:0021953	central nervous system neuron differentiation	5/188	174/18903	0.0301611	0.283496	0.258234	NKX2-2/LBX1/OTP/NHLH2/LHX1	5	0.0287356
GO:0042446	BP	GO:0042446	hormone biosynthetic process	3/188	68/18903	0.0302763	0.283496	0.258234	CYP11A1/HSD3B1/SRD5A2	3	0.0441176
GO:0007411	BP	GO:0007411	axon guidance	6/188	236/18903	0.0308992	0.286559	0.261024	LAMA1/FEZF1/LGR6/MYPN/OTX2/LHX1	6	0.0254237
GO:0015749	BP	GO:0015749	monosaccharide transmembrane transport	4/188	119/18903	0.03111	0.286559	0.261024	FGF19/TERT/ITLN1/OSTN	4	0.0336134
GO:0001702	BP	GO:0001702	gastrulation with mouth forming second	2/188	28/18903	0.0313958	0.286559	0.261024	OTX2/LHX1	2	0.0714286
GO:0070920	BP	GO:0070920	regulation of production of small RNA involved in gene silencing by RNA	2/188	28/18903	0.0313958	0.286559	0.261024	LIN28A/TERT	2	0.0714286
GO:0051148	BP	GO:0051148	negative regulation of muscle cell differentiation	3/188	69/18903	0.0314274	0.286559	0.261024	DKK1/SOX6/PI16	3	0.0434783
GO:0061371	BP	GO:0061371	determination of heart left/right asymmetry	3/188	69/18903	0.0314274	0.286559	0.261024	FGF8/LBX1/MESP1	3	0.0434783
GO:0097485	BP	GO:0097485	neuron projection guidance	6/188	237/18903	0.0314502	0.286559	0.261024	LAMA1/FEZF1/LGR6/MYPN/OTX2/LHX1	6	0.0253165
GO:0003143	BP	GO:0003143	embryonic heart tube morphogenesis	3/188	70/18903	0.0326012	0.294342	0.268112	FGF8/LBX1/MESP1	3	0.0428571
GO:0061512	BP	GO:0061512	protein localization to cilium	3/188	70/18903	0.0326012	0.294342	0.268112	ZMYND10/ROPN1/GFY	3	0.0428571
GO:0048732	BP	GO:0048732	gland development	9/188	441/18903	0.032677	0.294342	0.268112	LAMA1/FGF8/APOA1/PAX8/CGA/BAAT/MESP1/APLN/OTP	9	0.0204082
GO:0006656	BP	GO:0006656	phosphatidylcholine biosynthetic process	2/188	29/18903	0.0335048	0.298394	0.271804	APOA1/APOA2	2	0.0689655
GO:0034698	BP	GO:0034698	response to gonadotropin	2/188	29/18903	0.0335048	0.298394	0.271804	PAX8/SRD5A2	2	0.0689655
GO:0065005	BP	GO:0065005	protein-lipid complex assembly	2/188	29/18903	0.0335048	0.298394	0.271804	APOA1/APOA2	2	0.0689655
GO:0035265	BP	GO:0035265	organ growth	5/188	180/18903	0.0341682	0.303162	0.276147	FGF8/CGA/PI16/MESP1/OSTN	5	0.0277778
GO:0042698	BP	GO:0042698	ovulation cycle	3/188	72/18903	0.0350167	0.30726	0.27988	CGA/PTX3/NHLH2	3	0.0416667
GO:0046660	BP	GO:0046660	female sex differentiation	4/188	124/18903	0.0353964	0.30726	0.27988	CGA/PTX3/LHX1/SRD5A2	4	0.0322581
GO:0055007	BP	GO:0055007	cardiac muscle cell differentiation	4/188	124/18903	0.0353964	0.30726	0.27988	DKK1/SOX6/PI16/MESP1	4	0.0322581
GO:0008209	BP	GO:0008209	androgen metabolic process	2/188	30/18903	0.0356676	0.30726	0.27988	HSD3B1/SRD5A2	2	0.0666667
GO:0021522	BP	GO:0021522	spinal cord motor neuron differentiation	2/188	30/18903	0.0356676	0.30726	0.27988	NKX2-2/LBX1	2	0.0666667
GO:0034368	BP	GO:0034368	protein-lipid complex remodeling	2/188	30/18903	0.0356676	0.30726	0.27988	APOA1/APOA2	2	0.0666667
GO:0034369	BP	GO:0034369	plasma lipoprotein particle remodeling	2/188	30/18903	0.0356676	0.30726	0.27988	APOA1/APOA2	2	0.0666667
GO:0045940	BP	GO:0045940	positive regulation of steroid metabolic process	2/188	30/18903	0.0356676	0.30726	0.27988	APOA1/CGA	2	0.0666667
GO:0048568	BP	GO:0048568	embryonic organ development	9/188	449/18903	0.0360062	0.309053	0.281513	WNT16/COL11A1/MYO3A/FGF8/PAX8/LBX1/COL2A1/MESP1/LHX1	9	0.0200445
GO:0044000	BP	GO:0044000	movement in host	5/188	183/18903	0.0362899	0.310364	0.282707	SLC10A1/HAVCR1/PTX3/TRIML2/CLDN6	5	0.0273224
GO:1905952	BP	GO:1905952	regulation of lipid localization	5/188	185/18903	0.0377486	0.319376	0.290916	APOA1/LRAT/APOA2/GALR1/ABCA13	5	0.027027
GO:0033561	BP	GO:0033561	regulation of water loss via skin	2/188	31/18903	0.0378829	0.319376	0.290916	KRT16/TMPRSS11F	2	0.0645161
GO:0051491	BP	GO:0051491	positive regulation of filopodium assembly	2/188	31/18903	0.0378829	0.319376	0.290916	MYO3A/TENM2	2	0.0645161
GO:0061311	BP	GO:0061311	cell surface receptor signaling pathway involved in heart development	2/188	31/18903	0.0378829	0.319376	0.290916	DKK1/MESP1	2	0.0645161
GO:0072078	BP	GO:0072078	nephron tubule morphogenesis	3/188	75/18903	0.0388085	0.32582	0.296786	FGF8/PAX8/LHX1	3	0.04
GO:0007281	BP	GO:0007281	germ cell development	7/188	316/18903	0.0390315	0.32582	0.296786	ROPN1/PAEP/PIWIL1/LIN28A/STRA8/PTX3/BNC1	7	0.0221519
GO:0048706	BP	GO:0048706	embryonic skeletal system development	4/188	128/18903	0.0390599	0.32582	0.296786	COL11A1/FGF8/COL2A1/LHX1	4	0.03125
GO:0002700	BP	GO:0002700	regulation of production of molecular mediator of immune response	5/188	187/18903	0.0392428	0.326197	0.297129	PGC/APOA1/KLK3/APOA2/FCRL3	5	0.026738
GO:0009880	BP	GO:0009880	embryonic pattern specification	3/188	76/18903	0.0401171	0.326853	0.297726	MESP1/MESP2/LHX1	3	0.0394737
GO:0051339	BP	GO:0051339	regulation of lyase activity	3/188	76/18903	0.0401171	0.326853	0.297726	ADCYAP1/GALR1/GRM3	3	0.0394737
GO:0007435	BP	GO:0007435	salivary gland morphogenesis	2/188	32/18903	0.0401495	0.326853	0.297726	LAMA1/FGF8	2	0.0625
GO:0034367	BP	GO:0034367	protein-containing complex remodeling	2/188	32/18903	0.0401495	0.326853	0.297726	APOA1/APOA2	2	0.0625
GO:0046685	BP	GO:0046685	response to arsenic-containing substance	2/188	32/18903	0.0401495	0.326853	0.297726	TNFRSF11B/NEFL	2	0.0625
GO:0048240	BP	GO:0048240	sperm capacitation	2/188	32/18903	0.0401495	0.326853	0.297726	ROPN1/PAEP	2	0.0625
GO:0031279	BP	GO:0031279	regulation of cyclase activity	3/188	77/18903	0.0414478	0.335119	0.305256	ADCYAP1/GALR1/GRM3	3	0.038961
GO:0072088	BP	GO:0072088	nephron epithelium morphogenesis	3/188	77/18903	0.0414478	0.335119	0.305256	FGF8/PAX8/LHX1	3	0.038961
GO:0060795	BP	GO:0060795	cell fate commitment involved in formation of primary germ layer	2/188	33/18903	0.0424661	0.341025	0.310635	DKK1/MESP1	2	0.0606061
GO:0090183	BP	GO:0090183	regulation of kidney development	2/188	33/18903	0.0424661	0.341025	0.310635	PAX8/LHX1	2	0.0606061
GO:0140115	BP	GO:0140115	export across plasma membrane	3/188	78/18903	0.0428006	0.341298	0.310885	ATP12A/PDZK1/SLC47A2	3	0.0384615
GO:0006639	BP	GO:0006639	acylglycerol metabolic process	4/188	132/18903	0.0429324	0.341298	0.310885	APOA1/THRSP/APOA2/DGKK	4	0.030303
GO:0034219	BP	GO:0034219	carbohydrate transmembrane transport	4/188	132/18903	0.0429324	0.341298	0.310885	FGF19/TERT/ITLN1/OSTN	4	0.030303
GO:0006638	BP	GO:0006638	neutral lipid metabolic process	4/188	133/18903	0.0439332	0.348086	0.317068	APOA1/THRSP/APOA2/DGKK	4	0.0300752
GO:0061333	BP	GO:0061333	renal tubule morphogenesis	3/188	79/18903	0.0441754	0.348838	0.317753	FGF8/PAX8/LHX1	3	0.0379747
GO:0007431	BP	GO:0007431	salivary gland development	2/188	34/18903	0.0448316	0.350515	0.31928	LAMA1/FGF8	2	0.0588235
GO:0060317	BP	GO:0060317	cardiac epithelial to mesenchymal transition	2/188	34/18903	0.0448316	0.350515	0.31928	WNT16/FGF8	2	0.0588235
GO:1905207	BP	GO:1905207	regulation of cardiocyte differentiation	2/188	34/18903	0.0448316	0.350515	0.31928	DKK1/SOX6	2	0.0588235
GO:0001895	BP	GO:0001895	retina homeostasis	3/188	80/18903	0.045572	0.353967	0.322425	CST4/SLC28A2/ABCA4	3	0.0375
GO:0072028	BP	GO:0072028	nephron morphogenesis	3/188	80/18903	0.045572	0.353967	0.322425	FGF8/PAX8/LHX1	3	0.0375
GO:0045664	BP	GO:0045664	regulation of neuron differentiation	5/188	196/18903	0.0464098	0.357581	0.325717	DKK1/NKX2-2/FEZF1/LIN28A/LBX1	5	0.0255102
GO:0071216	BP	GO:0071216	cellular response to biotic stimulus	6/188	261/18903	0.0466339	0.357581	0.325717	CSF3/IL36G/IL36RN/ANKRD1/CXCL5/NLRP7	6	0.0229885
GO:0032371	BP	GO:0032371	regulation of sterol transport	3/188	81/18903	0.0469903	0.357581	0.325717	APOA1/APOA2/ABCA13	3	0.037037
GO:0032374	BP	GO:0032374	regulation of cholesterol transport	3/188	81/18903	0.0469903	0.357581	0.325717	APOA1/APOA2/ABCA13	3	0.037037
GO:0002719	BP	GO:0002719	negative regulation of cytokine production involved in immune response	2/188	35/18903	0.0472448	0.357581	0.325717	APOA1/APOA2	2	0.0571429
GO:0060914	BP	GO:0060914	heart formation	2/188	35/18903	0.0472448	0.357581	0.325717	DKK1/MESP1	2	0.0571429
GO:1901099	BP	GO:1901099	negative regulation of signal transduction in absence of ligand	2/188	35/18903	0.0472448	0.357581	0.325717	COL2A1/TERT	2	0.0571429
GO:2001240	BP	GO:2001240	negative regulation of extrinsic apoptotic signaling pathway in absence of ligand	2/188	35/18903	0.0472448	0.357581	0.325717	COL2A1/TERT	2	0.0571429
GO:0021766	BP	GO:0021766	hippocampus development	3/188	82/18903	0.0484302	0.365386	0.332826	HSD3B1/NEFL/SRD5A2	3	0.0365854
GO:0060249	BP	GO:0060249	anatomical structure homeostasis	7/188	333/18903	0.0492756	0.370512	0.337495	CST4/CALB1/SLC28A2/COL2A1/TNFRSF11B/MUC13/ABCA4	7	0.021021
GO:0006699	BP	GO:0006699	bile acid biosynthetic process	2/188	36/18903	0.0497044	0.370512	0.337495	BAAT/FGF19	2	0.0555556
GO:1905332	BP	GO:1905332	positive regulation of morphogenesis of an epithelium	2/188	36/18903	0.0497044	0.370512	0.337495	PAX8/LHX1	2	0.0555556
GO:0043393	BP	GO:0043393	regulation of protein binding	5/188	200/18903	0.0498294	0.370512	0.337495	ADD2/DKK1/CSF3/TERT/RGMA	5	0.025
GO:0006096	BP	GO:0006096	glycolytic process	3/188	83/18903	0.0498917	0.370512	0.337495	GAPDHS/ALDOB/HKDC1	3	0.0361446
GO:0001533	CC	GO:0001533	cornified envelope	12/199	59/19869	5.41383e-13	1.2939e-10	1.14545e-10	TGM1/CNFN/PI3/DSC2/DSG1/DSC1/SPRR2G/SPRR2D/SPRR1B/DSG4/KRT16/SPRR2F	12	0.20339
GO:0030057	CC	GO:0030057	desmosome	4/199	25/19869	0.000104729	0.0125151	0.0110792	DSC2/DSG1/DSC1/DSG4	4	0.16
GO:0005796	CC	GO:0005796	Golgi lumen	6/199	106/19869	0.000696053	0.0554522	0.04909	NCAN/CGA/MUC17/MUCL1/MUC13/MUC21	6	0.0566038
GO:0098862	CC	GO:0098862	cluster of actin-based cell projections	7/199	159/19869	0.00112639	0.0633054	0.0560423	MYO3A/CALB1/VIL1/SLC28A2/PDZK1/ITLN1/CEACAM16	7	0.0440252
GO:0098644	CC	GO:0098644	complex of collagen trimers	3/199	22/19869	0.00132438	0.0633054	0.0560423	COL11A1/COL10A1/COL2A1	3	0.136364
GO:0034364	CC	GO:0034364	high-density lipoprotein particle	3/199	27/19869	0.00242465	0.0965819	0.0855008	APOA1/SAA2/APOA2	3	0.111111
GO:0072562	CC	GO:0072562	blood microparticle	6/199	145/19869	0.00344313	0.101783	0.0901047	KNG1/SERPINC1/APOA1/AHSG/GC/APOA2	6	0.0413793
GO:0099569	CC	GO:0099569	presynaptic cytoskeleton	2/199	10/19869	0.00426011	0.101783	0.0901047	RIMS3/NEFL	2	0.2
GO:0005788	CC	GO:0005788	endoplasmic reticulum lumen	9/199	312/19869	0.00432632	0.101783	0.0901047	COL11A1/KNG1/SERPINC1/APOA1/COL10A1/COL2A1/AHSG/APOA2/IL27	9	0.0288462
GO:0034358	CC	GO:0034358	plasma lipoprotein particle	3/199	36/19869	0.00554082	0.101783	0.0901047	APOA1/SAA2/APOA2	3	0.0833333
GO:1990777	CC	GO:1990777	lipoprotein particle	3/199	36/19869	0.00554082	0.101783	0.0901047	APOA1/SAA2/APOA2	3	0.0833333
GO:0005882	CC	GO:0005882	intermediate filament	7/199	215/19869	0.00605226	0.101783	0.0901047	KRT34/KRT6C/KRT6B/KRT16/KRT14/KRT81/NEFL	7	0.0325581
GO:0005583	CC	GO:0005583	fibrillar collagen trimer	2/199	12/19869	0.00616639	0.101783	0.0901047	COL11A1/COL2A1	2	0.166667
GO:0098643	CC	GO:0098643	banded collagen fibril	2/199	12/19869	0.00616639	0.101783	0.0901047	COL11A1/COL2A1	2	0.166667
GO:0032994	CC	GO:0032994	protein-lipid complex	3/199	39/19869	0.00693832	0.101783	0.0901047	APOA1/SAA2/APOA2	3	0.0769231
GO:0150034	CC	GO:0150034	distal axon	8/199	278/19869	0.00709558	0.101783	0.0901047	SNCB/CALB1/NTS/CPLX2/TENM2/LRRTM1/OTX2/NEFL	8	0.028777
GO:0042627	CC	GO:0042627	chylomicron	2/199	13/19869	0.00723976	0.101783	0.0901047	APOA1/APOA2	2	0.153846
GO:0062023	CC	GO:0062023	collagen-containing extracellular matrix	10/199	433/19869	0.012193	0.15467	0.136924	COL11A1/LAMA1/KNG1/SERPINC1/APOA1/COL10A1/COL2A1/AHSG/SOST/MUC17	10	0.0230947
GO:0042599	CC	GO:0042599	lamellar body	2/199	17/19869	0.012296	0.15467	0.136924	SFTPB/KRTDAP	2	0.117647
GO:0045111	CC	GO:0045111	intermediate filament cytoskeleton	7/199	253/19869	0.0140225	0.166359	0.147272	KRT34/KRT6C/KRT6B/KRT16/KRT14/KRT81/NEFL	7	0.027668
GO:0032433	CC	GO:0032433	filopodium tip	2/199	19/19869	0.0152592	0.166359	0.147272	MYO3A/VIL1	2	0.105263
GO:0034361	CC	GO:0034361	very-low-density lipoprotein particle	2/199	20/19869	0.0168441	0.166359	0.147272	APOA1/APOA2	2	0.1
GO:0034385	CC	GO:0034385	triglyceride-rich plasma lipoprotein particle	2/199	20/19869	0.0168441	0.166359	0.147272	APOA1/APOA2	2	0.1
GO:0032426	CC	GO:0032426	stereocilium tip	2/199	21/19869	0.0184958	0.166359	0.147272	MYO3A/CEACAM16	2	0.0952381
GO:0032420	CC	GO:0032420	stereocilium	3/199	56/19869	0.0185981	0.166359	0.147272	MYO3A/CALB1/CEACAM16	3	0.0535714
GO:0045095	CC	GO:0045095	keratin filament	4/199	101/19869	0.0187693	0.166359	0.147272	KRT6C/KRT6B/KRT14/KRT81	4	0.039604
GO:0005903	CC	GO:0005903	brush border	4/199	102/19869	0.0193867	0.166359	0.147272	VIL1/SLC28A2/PDZK1/ITLN1	4	0.0392157
GO:0031526	CC	GO:0031526	brush border membrane	3/199	57/19869	0.0194898	0.166359	0.147272	SLC28A2/PDZK1/ITLN1	3	0.0526316
GO:0071682	CC	GO:0071682	endocytic vesicle lumen	2/199	23/19869	0.021994	0.181261	0.160465	CSF3/APOA1	2	0.0869565
GO:0098858	CC	GO:0098858	actin-based cell projection	6/199	223/19869	0.0250887	0.189177	0.167472	MYO3A/CALB1/VIL1/TENM2/PDZK1/CEACAM16	6	0.0269058
GO:0005771	CC	GO:0005771	multivesicular body	3/199	63/19869	0.0253291	0.189177	0.167472	LRAT/CD300LG/SFTPB	3	0.047619
GO:0032421	CC	GO:0032421	stereocilium bundle	3/199	63/19869	0.0253291	0.189177	0.167472	MYO3A/CALB1/CEACAM16	3	0.047619
GO:0016323	CC	GO:0016323	basolateral plasma membrane	6/199	229/19869	0.028084	0.200792	0.177755	ATP12A/SLC10A1/SLC39A5/CD300LG/CDH16/SLCO4C1	6	0.0262009
GO:0043679	CC	GO:0043679	axon terminus	4/199	115/19869	0.0285646	0.200792	0.177755	SNCB/CALB1/NTS/CPLX2	4	0.0347826
GO:0045177	CC	GO:0045177	apical part of cell	9/199	435/19869	0.031602	0.215218	0.190525	ZMYND10/ATP12A/DSG1/CD300LG/FABP1/SLC22A11/MUC17/MUC13/PDZK1	9	0.0206897
GO:0016324	CC	GO:0016324	apical plasma membrane	8/199	368/19869	0.0324178	0.215218	0.190525	ZMYND10/ATP12A/DSG1/CD300LG/SLC22A11/MUC17/MUC13/PDZK1	8	0.0217391
GO:0044306	CC	GO:0044306	neuron projection terminus	4/199	131/19869	0.0428831	0.270889	0.239809	SNCB/CALB1/NTS/CPLX2	4	0.0305344
GO:0009925	CC	GO:0009925	basal plasma membrane	6/199	254/19869	0.0430701	0.270889	0.239809	ATP12A/SLC10A1/SLC39A5/CD300LG/CDH16/SLCO4C1	6	0.023622
GO:0048018	MF	GO:0048018	receptor ligand activity	21/188	491/18432	3.23042e-08	7.93949e-06	7.03663e-06	WNT16/FGF8/DKK1/CSF3/PPY/APOA1/INSL4/NTS/CGA/IL36G/IL36RN/FGF5/ADCYAP1/IFNK/FGF19/CXCL5/TNFRSF11B/APLN/CALCB/OSTN/IL27	21	0.0427699
GO:0030546	MF	GO:0030546	signaling receptor activator activity	21/188	498/18432	4.11372e-08	7.93949e-06	7.03663e-06	WNT16/FGF8/DKK1/CSF3/PPY/APOA1/INSL4/NTS/CGA/IL36G/IL36RN/FGF5/ADCYAP1/IFNK/FGF19/CXCL5/TNFRSF11B/APLN/CALCB/OSTN/IL27	21	0.0421687
GO:0030414	MF	GO:0030414	peptidase inhibitor activity	13/188	187/18432	6.51219e-08	8.37902e-06	7.42618e-06	SERPINA4/CST4/KNG1/SERPINC1/PI3/VIL1/AHSG/SPINK7/PI16/NLRP7/WFDC12/CST5/SPINK6	13	0.0695187
GO:0004866	MF	GO:0004866	endopeptidase inhibitor activity	12/188	180/18432	3.33495e-07	3.21823e-05	2.85226e-05	SERPINA4/CST4/KNG1/SERPINC1/PI3/VIL1/AHSG/SPINK7/NLRP7/WFDC12/CST5/SPINK6	12	0.0666667
GO:0061135	MF	GO:0061135	endopeptidase regulator activity	12/188	194/18432	7.4413e-07	5.04701e-05	4.47308e-05	SERPINA4/CST4/KNG1/SERPINC1/PI3/VIL1/AHSG/SPINK7/NLRP7/WFDC12/CST5/SPINK6	12	0.0618557
GO:0061134	MF	GO:0061134	peptidase regulator activity	13/188	232/18432	7.8451e-07	5.04701e-05	4.47308e-05	SERPINA4/CST4/KNG1/SERPINC1/PI3/VIL1/AHSG/SPINK7/PI16/NLRP7/WFDC12/CST5/SPINK6	13	0.0560345
GO:0004857	MF	GO:0004857	enzyme inhibitor activity	16/188	395/18432	3.08039e-06	0.000169862	0.000150545	SNCB/GCKR/SERPINA4/CST4/KNG1/SERPINC1/PI3/VIL1/AHSG/SPINK7/APOA2/PI16/NLRP7/WFDC12/CST5/SPINK6	16	0.0405063
GO:0005179	MF	GO:0005179	hormone activity	8/188	122/18432	3.6073e-05	0.00174052	0.0015426	PPY/INSL4/NTS/CGA/ADCYAP1/APLN/CALCB/OSTN	8	0.0655738
GO:0005184	MF	GO:0005184	neuropeptide hormone activity	4/188	30/18432	0.000233423	0.0100112	0.0088728	PPY/NTS/ADCYAP1/CALCB	4	0.133333
GO:0004869	MF	GO:0004869	cysteine-type endopeptidase inhibitor activity	5/188	56/18432	0.000262285	0.0101242	0.00897291	CST4/KNG1/VIL1/AHSG/CST5	5	0.0892857
GO:0071855	MF	GO:0071855	neuropeptide receptor binding	4/188	36/18432	0.000478351	0.015799	0.0140024	PPY/NTS/ADCYAP1/APLN	4	0.111111
GO:0004867	MF	GO:0004867	serine-type endopeptidase inhibitor activity	6/188	98/18432	0.000503051	0.015799	0.0140024	SERPINA4/SERPINC1/PI3/SPINK7/WFDC12/SPINK6	6	0.0612245
GO:0030280	MF	GO:0030280	structural constituent of skin epidermis	4/188	37/18432	0.00053209	0.015799	0.0140024	PI3/KRT6C/KRT6B/KRT81	4	0.108108
GO:0005319	MF	GO:0005319	lipid transporter activity	7/188	161/18432	0.00133844	0.0369026	0.0327061	SLC10A1/APOA1/SLC10A4/APOA2/FABP1/ABCA13/ABCA4	7	0.0434783
GO:0005104	MF	GO:0005104	fibroblast growth factor receptor binding	3/188	25/18432	0.00203584	0.0523889	0.0464314	FGF8/FGF5/FGF19	3	0.12
GO:0005125	MF	GO:0005125	cytokine activity	8/188	237/18432	0.00305096	0.0676827	0.059986	WNT16/CSF3/IL36G/IL36RN/IFNK/CXCL5/TNFRSF11B/IL27	8	0.0337553
GO:0070325	MF	GO:0070325	lipoprotein particle receptor binding	3/188	29/18432	0.00313908	0.0676827	0.059986	DKK1/APOA1/APOA2	3	0.103448
GO:0070851	MF	GO:0070851	growth factor receptor binding	6/188	140/18432	0.00315619	0.0676827	0.059986	FGF8/CSF3/IL36G/IL36RN/FGF5/FGF19	6	0.0428571
GO:0005343	MF	GO:0005343	organic acid:sodium symporter activity	3/188	32/18432	0.00416673	0.0846505	0.0750243	SLC10A1/SLC13A5/SLC10A4	3	0.09375
GO:0005200	MF	GO:0005200	structural constituent of cytoskeleton	5/188	107/18432	0.00481047	0.0928422	0.0822844	ADD2/KRT6B/KRT16/KRT14/NEFL	5	0.046729
GO:0015081	MF	GO:0015081	sodium ion transmembrane transporter activity	6/188	156/18432	0.00534881	0.0983162	0.087136	ATP12A/SLC10A1/SLC28A2/SLC13A5/SLC10A4/SCN11A	6	0.0384615
GO:0008035	MF	GO:0008035	high-density lipoprotein particle binding	2/188	12/18432	0.00638573	0.107169	0.0949822	APOA1/APOA2	2	0.166667
GO:0140161	MF	GO:0140161	monocarboxylate:sodium symporter activity	2/188	12/18432	0.00638573	0.107169	0.0949822	SLC10A1/SLC10A4	2	0.166667
GO:0015370	MF	GO:0015370	solute:sodium symporter activity	4/188	76/18432	0.00759821	0.12112	0.107346	SLC10A1/SLC28A2/SLC13A5/SLC10A4	4	0.0526316
GO:0022853	MF	GO:0022853	active ion transmembrane transporter activity	8/188	278/18432	0.00784455	0.12112	0.107346	ATP12A/SLC10A1/SLC28A2/SLC13A5/SLC10A4/SLC22A11/SLCO4C1/SLC47A2	8	0.028777
GO:0030020	MF	GO:0030020	extracellular matrix structural constituent conferring tensile strength	3/188	41/18432	0.00837529	0.124341	0.110201	COL11A1/COL10A1/COL2A1	3	0.0731707
GO:0004252	MF	GO:0004252	serine-type endopeptidase activity	6/188	174/18432	0.00896256	0.128131	0.113561	KLK10/KLK3/CORIN/TMPRSS3/TMPRSS11F/PRSS56	6	0.0344828
GO:0015355	MF	GO:0015355	secondary active monocarboxylate transmembrane transporter activity	2/188	15/18432	0.00995724	0.137268	0.121658	SLC10A1/SLC10A4	2	0.133333
GO:0022804	MF	GO:0022804	active transmembrane transporter activity	10/188	417/18432	0.010695	0.140752	0.124746	ATP12A/SLC10A1/SLC28A2/SLC13A5/SLC10A4/SLC22A11/SLCO4C1/ABCA13/SLC47A2/ABCA4	10	0.0239808
GO:0005539	MF	GO:0005539	glycosaminoglycan binding	7/188	237/18432	0.0110155	0.140752	0.124746	COL11A1/KNG1/SERPINC1/NCAN/LGR6/RNASE7/SOST	7	0.0295359
GO:0015347	MF	GO:0015347	sodium-independent organic anion transmembrane transporter activity	2/188	16/18432	0.011304	0.140752	0.124746	SLC22A11/SLCO4C1	2	0.125
GO:0005149	MF	GO:0005149	interleukin-1 receptor binding	2/188	17/18432	0.0127259	0.148855	0.131928	IL36G/IL36RN	2	0.117647
GO:0055102	MF	GO:0055102	lipase inhibitor activity	2/188	17/18432	0.0127259	0.148855	0.131928	SNCB/APOA2	2	0.117647
GO:0015291	MF	GO:0015291	secondary active transmembrane transporter activity	7/188	246/18432	0.0133034	0.151033	0.133858	SLC10A1/SLC28A2/SLC13A5/SLC10A4/SLC22A11/SLCO4C1/SLC47A2	7	0.0284553
GO:0008236	MF	GO:0008236	serine-type peptidase activity	6/188	192/18432	0.0140594	0.155055	0.137422	KLK10/KLK3/CORIN/TMPRSS3/TMPRSS11F/PRSS56	6	0.03125
GO:0017171	MF	GO:0017171	serine hydrolase activity	6/188	196/18432	0.01542	0.165337	0.146536	KLK10/KLK3/CORIN/TMPRSS3/TMPRSS11F/PRSS56	6	0.0306122
GO:1901618	MF	GO:1901618	organic hydroxy compound transmembrane transporter activity	3/188	53/18432	0.0168417	0.1757	0.15572	SLC10A1/SLC10A4/ABCA4	3	0.0566038
GO:0016500	MF	GO:0016500	protein-hormone receptor activity	2/188	20/18432	0.017427	0.177022	0.156892	PAX8/LGR6	2	0.1
GO:0019842	MF	GO:0019842	vitamin binding	5/188	149/18432	0.0184277	0.182387	0.161646	CALB1/LRAT/TCN1/GC/ABCA4	5	0.033557
GO:0015125	MF	GO:0015125	bile acid transmembrane transporter activity	2/188	21/18432	0.0191338	0.184641	0.163644	SLC10A1/SLC10A4	2	0.0952381
GO:0005496	MF	GO:0005496	steroid binding	4/188	101/18432	0.0198943	0.187297	0.165999	CALB1/APOA1/GC/APOA2	4	0.039604
GO:0120020	MF	GO:0120020	cholesterol transfer activity	2/188	22/18432	0.0209078	0.192152	0.170301	APOA1/APOA2	2	0.0909091
GO:0004497	MF	GO:0004497	monooxygenase activity	4/188	104/18432	0.0218888	0.19649	0.174146	FMO3/CYP3A43/MIOX/CYP11A1	4	0.0384615
GO:0120015	MF	GO:0120015	sterol transfer activity	2/188	23/18432	0.0227474	0.197149	0.17473	APOA1/APOA2	2	0.0869565
GO:0030246	MF	GO:0030246	carbohydrate binding	7/188	275/18432	0.0229837	0.197149	0.17473	GCKR/NCAN/ALDOB/HKDC1/PTX3/SOST/ITLN1	7	0.0254545
GO:0008083	MF	GO:0008083	growth factor activity	5/188	162/18432	0.0253626	0.209229	0.185436	FGF8/DKK1/CSF3/FGF5/FGF19	5	0.0308642
GO:0015294	MF	GO:0015294	solute:cation symporter activity	4/188	109/18432	0.0254761	0.209229	0.185436	SLC10A1/SLC28A2/SLC13A5/SLC10A4	4	0.0366972
GO:0001664	MF	GO:0001664	G protein-coupled receptor binding	7/188	289/18432	0.0290644	0.233726	0.207148	WNT16/PPY/NTS/ADCYAP1/CXCL5/APLN/CALCB	7	0.0242215
GO:0008201	MF	GO:0008201	heparin binding	5/188	171/18432	0.031029	0.244433	0.216637	COL11A1/KNG1/SERPINC1/LGR6/SOST	5	0.0292398
GO:0005201	MF	GO:0005201	extracellular matrix structural constituent	5/188	173/18432	0.0323876	0.250033	0.2216	COL11A1/LAMA1/COL10A1/COL2A1/MUC17	5	0.0289017
GO:0046873	MF	GO:0046873	metal ion transmembrane transporter activity	9/188	436/18432	0.0351931	0.266364	0.236074	ATP12A/SLC10A1/SLC28A2/SLC39A5/SLC13A5/SLC10A4/SCN11A/KCNK3/KCNH6	9	0.0206422
GO:0071813	MF	GO:0071813	lipoprotein particle binding	2/188	30/18432	0.0373408	0.271954	0.241028	APOA1/APOA2	2	0.0666667
GO:0071814	MF	GO:0071814	protein-lipid complex binding	2/188	30/18432	0.0373408	0.271954	0.241028	APOA1/APOA2	2	0.0666667
GO:0031210	MF	GO:0031210	phosphatidylcholine binding	2/188	31/18432	0.0396537	0.278297	0.24665	APOA1/APOA2	2	0.0645161
GO:0033764	MF	GO:0033764	steroid dehydrogenase activity, acting on the CH-OH group of donors, NAD or NADP as acceptor	2/188	31/18432	0.0396537	0.278297	0.24665	HSD3B1/SRD5A2	2	0.0645161
GO:0031369	MF	GO:0031369	translation initiation factor binding	2/188	32/18432	0.0420194	0.279647	0.247846	LIN28A/OTX2	2	0.0625
GO:0048019	MF	GO:0048019	receptor antagonist activity	2/188	32/18432	0.0420194	0.279647	0.247846	DKK1/IL36RN	2	0.0625
GO:0090482	MF	GO:0090482	vitamin transmembrane transporter activity	2/188	32/18432	0.0420194	0.279647	0.247846	GC/ABCA4	2	0.0625
GO:0001618	MF	GO:0001618	virus receptor activity	3/188	77/18432	0.0441085	0.288574	0.255758	SLC10A1/HAVCR1/CLDN6	3	0.038961
GO:0140272	MF	GO:0140272	exogenous protein binding	3/188	78/18432	0.0455402	0.292975	0.259659	SLC10A1/HAVCR1/CLDN6	3	0.0384615
GO:0033293	MF	GO:0033293	monocarboxylic acid binding	3/188	81/18432	0.0499719	0.316216	0.280257	LRAT/FABP1/FABP7	3	0.037037

## Sheet: KEGG
	ID	Description	GeneRatio	BgRatio	pvalue	p.adjust	qvalue	geneID	Count
hsa00140	hsa00140	Steroid hormone biosynthesis	4/89	62/8840	0.00343271	0.281382	0.262623	CYP11A1/UGT2B4/HSD3B1/SRD5A2	4
hsa04080	hsa04080	Neuroactive ligand-receptor interaction	10/89	368/8840	0.00375176	0.281382	0.262623	PPY/KNG1/NTS/CGA/ADCYAP1/GALR1/APLN/CALCB/QRFPR/GRM3	10
hsa03320	hsa03320	PPAR signaling pathway	4/89	76/8840	0.00709795	0.301581	0.281475	APOA1/APOA2/FABP1/FABP7	4
hsa04060	hsa04060	Cytokine-cytokine receptor interaction	8/89	298/8840	0.0100776	0.301581	0.281475	IL12RB2/CSF3/IL36G/IL36RN/IFNK/CXCL5/TNFRSF11B/IL27	8
hsa00430	hsa00430	Taurine and hypotaurine metabolism	2/89	16/8840	0.0109739	0.301581	0.281475	FMO3/BAAT	2
hsa04913	hsa04913	Ovarian steroidogenesis	3/89	51/8840	0.0145062	0.301581	0.281475	CGA/CYP11A1/HSD3B1	3
hsa05224	hsa05224	Breast cancer	5/89	148/8840	0.0165747	0.301581	0.281475	WNT16/DLL3/FGF8/FGF5/FGF19	5
hsa05226	hsa05226	Gastric cancer	5/89	150/8840	0.0174683	0.301581	0.281475	WNT16/FGF8/FGF5/FGF19/TERT	5
hsa05150	hsa05150	Staphylococcus aureus infection	4/89	100/8840	0.0180949	0.301581	0.281475	KRT34/DSG1/KRT16/KRT14	4
hsa04927	hsa04927	Cortisol synthesis and secretion	3/89	65/8840	0.0275264	0.343404	0.32051	CYP11A1/KCNK3/HSD3B1	3
hsa04977	hsa04977	Vitamin digestion and absorption	2/89	26/8840	0.0278527	0.343404	0.32051	APOA1/LRAT	2
hsa04820	hsa04820	Cytoskeleton in muscle cells	6/89	232/8840	0.0292404	0.343404	0.32051	COL11A1/LAMA1/CKM/DSC2/MYPN/ANKRD1	6
hsa00010	hsa00010	Glycolysis / Gluconeogenesis	3/89	67/8840	0.0297617	0.343404	0.32051	GAPDHS/ALDOB/HKDC1	3
hsa00053	hsa00053	Ascorbate and aldarate metabolism	2/89	30/8840	0.0363294	0.370256	0.345572	MIOX/UGT2B4	2
hsa05218	hsa05218	Melanoma	3/89	73/8840	0.0370256	0.370256	0.345572	FGF8/FGF5/FGF19	3
hsa05202	hsa05202	Transcriptional misregulation in cancer	5/89	193/8840	0.0448637	0.402896	0.376037	WNT16/PAX8/SSX1/HMGA2/TSPAN7	5
hsa00051	hsa00051	Fructose and mannose metabolism	2/89	34/8840	0.0456616	0.402896	0.376037	ALDOB/HKDC1	2
hsa01250	hsa01250	Biosynthesis of nucleotide sugars	2/89	37/8840	0.0531742	0.419796	0.39181	MIOX/HKDC1	2
hsa05143	hsa05143	African trypanosomiasis	2/89	37/8840	0.0531742	0.419796	0.39181	KNG1/APOA1	2
hsa04976	hsa04976	Bile secretion	3/89	90/8840	0.0620123	0.465092	0.434086	SLC10A1/BAAT/UGT2B4	3
hsa04975	hsa04975	Fat digestion and absorption	2/89	43/8840	0.0693828	0.47434	0.442717	APOA1/FABP1	2
hsa04934	hsa04934	Cushing syndrome	4/89	155/8840	0.0707952	0.47434	0.442717	WNT16/CYP11A1/KCNK3/HSD3B1	4
hsa02010	hsa02010	ABC transporters	2/89	45/8840	0.0751041	0.47434	0.442717	ABCA13/ABCA4	2
hsa04925	hsa04925	Aldosterone synthesis and secretion	3/89	98/8840	0.0758944	0.47434	0.442717	CYP11A1/KCNK3/HSD3B1	3
hsa04630	hsa04630	JAK-STAT signaling pathway	4/89	168/8840	0.0890389	0.498792	0.465539	IL12RB2/CSF3/IFNK/IL27	4
hsa04974	hsa04974	Protein digestion and absorption	3/89	105/8840	0.0890665	0.498792	0.465539	COL11A1/COL10A1/COL2A1	3
hsa00520	hsa00520	Amino sugar and nucleotide sugar metabolism	2/89	50/8840	0.0900254	0.498792	0.465539	CHIA/HKDC1	2
hsa04979	hsa04979	Cholesterol metabolism	2/89	51/8840	0.0931078	0.498792	0.465539	APOA1/APOA2	2
hsa04310	hsa04310	Wnt signaling pathway	4/89	174/8840	0.0981575	0.507711	0.473864	WNT16/DKK1/LGR6/SOST	4
hsa00830	hsa00830	Retinol metabolism	2/89	68/8840	0.149481	0.670494	0.625794	LRAT/UGT2B4	2
hsa04151	hsa04151	PI3K-Akt signaling pathway	6/89	362/8840	0.157055	0.670494	0.625794	LAMA1/FGF8/CSF3/FGF5/COL2A1/FGF19	6
hsa00120	hsa00120	Primary bile acid biosynthesis	1/89	17/8840	0.158171	0.670494	0.625794	BAAT	1
hsa05204	hsa05204	Chemical carcinogenesis - DNA adducts	2/89	71/8840	0.160041	0.670494	0.625794	CYP3A43/UGT2B4	2
hsa04915	hsa04915	Estrogen signaling pathway	3/89	139/8840	0.164445	0.670494	0.625794	KRT34/KRT16/KRT14	3
hsa04980	hsa04980	Cobalamin transport and metabolism	1/89	18/8840	0.166662	0.670494	0.625794	TCN1	1
hsa00982	hsa00982	Drug metabolism - cytochrome P450	2/89	73/8840	0.167158	0.670494	0.625794	FMO3/UGT2B4	2
hsa05207	hsa05207	Chemical carcinogenesis - receptor activation	4/89	215/8840	0.170861	0.670494	0.625794	DLL3/FGF8/FGF5/UGT2B4	4
hsa01230	hsa01230	Biosynthesis of amino acids	2/89	75/8840	0.174328	0.670494	0.625794	ALDOB/MAT1A	2
hsa04918	hsa04918	Thyroid hormone synthesis	2/89	75/8840	0.174328	0.670494	0.625794	PAX8/CGA	2
hsa04810	hsa04810	Regulation of actin cytoskeleton	4/89	230/8840	0.201223	0.744369	0.694744	FGF8/KNG1/FGF5/FGF19	4
hsa04146	hsa04146	Peroxisome	2/89	83/8840	0.203461	0.744369	0.694744	PEX5L/BAAT	2
hsa04514	hsa04514	Cell adhesion molecules	3/89	157/8840	0.2101	0.748047	0.698177	LRRC4/CNTNAP2/CLDN6	3
hsa05412	hsa05412	Arrhythmogenic right ventricular cardiomyopathy	2/89	86/8840	0.21453	0.748047	0.698177	LAMA1/DSC2	2
hsa04610	hsa04610	Complement and coagulation cascades	2/89	88/8840	0.221943	0.748047	0.698177	KNG1/SERPINC1	2
hsa04512	hsa04512	ECM-receptor interaction	2/89	89/8840	0.225657	0.748047	0.698177	LAMA1/COL2A1	2
hsa04950	hsa04950	Maturity onset diabetes of the young	1/89	26/8840	0.231616	0.748047	0.698177	NKX2-2	1
hsa04658	hsa04658	Th1 and Th2 cell differentiation	2/89	92/8840	0.236827	0.748047	0.698177	IL12RB2/DLL3	2
hsa01040	hsa01040	Biosynthesis of unsaturated fatty acids	1/89	27/8840	0.239375	0.748047	0.698177	BAAT	1
hsa04657	hsa04657	IL-17 signaling pathway	2/89	95/8840	0.248029	0.759272	0.708654	CSF3/CXCL5	2
hsa04970	hsa04970	Salivary secretion	2/89	97/8840	0.255508	0.762501	0.711668	CST4/CST5	2
hsa05215	hsa05215	Prostate cancer	2/89	98/8840	0.25925	0.762501	0.711668	KLK3/SRD5A2	2
hsa00030	hsa00030	Pentose phosphate pathway	1/89	31/8840	0.269643	0.777817	0.725962	ALDOB	1
hsa00052	hsa00052	Galactose metabolism	1/89	32/8840	0.277022	0.784025	0.731757	HKDC1	1
hsa04066	hsa04066	HIF-1 signaling pathway	2/89	109/8840	0.300392	0.834022	0.778421	ALDOB/HKDC1	2
hsa00040	hsa00040	Pentose and glucuronate interconversions	1/89	36/8840	0.305808	0.834022	0.778421	UGT2B4	1
hsa05216	hsa05216	Thyroid cancer	1/89	37/8840	0.312826	0.837926	0.782065	PAX8	1
hsa01200	hsa01200	Carbon metabolism	2/89	116/8840	0.326415	0.858988	0.801722	ALDOB/HKDC1	2
hsa00500	hsa00500	Starch and sucrose metabolism	1/89	40/8840	0.333461	0.862398	0.804905	HKDC1	1
hsa04015	hsa04015	Rap1 signaling pathway	3/89	212/8840	0.360226	0.864791	0.807138	FGF8/FGF5/FGF19	3
hsa00860	hsa00860	Porphyrin metabolism	1/89	46/8840	0.372909	0.864791	0.807138	UGT2B4	1
hsa04930	hsa04930	Type II diabetes mellitus	1/89	47/8840	0.379256	0.864791	0.807138	HKDC1	1
hsa05030	hsa05030	Cocaine addiction	1/89	49/8840	0.391759	0.864791	0.807138	GRM3	1
hsa00330	hsa00330	Arginine and proline metabolism	1/89	50/8840	0.397917	0.864791	0.807138	CKM	1
hsa05144	hsa05144	Malaria	1/89	50/8840	0.397917	0.864791	0.807138	CSF3	1
hsa00270	hsa00270	Cysteine and methionine metabolism	1/89	52/8840	0.410048	0.864791	0.807138	MAT1A	1
hsa04973	hsa04973	Carbohydrate digestion and absorption	1/89	52/8840	0.410048	0.864791	0.807138	HKDC1	1
hsa04961	hsa04961	Endocrine and other factor-regulated calcium reabsorption	1/89	53/8840	0.416023	0.864791	0.807138	CALB1	1
hsa05320	hsa05320	Autoimmune thyroid disease	1/89	53/8840	0.416023	0.864791	0.807138	CGA	1
hsa04014	hsa04014	Ras signaling pathway	3/89	238/8840	0.431189	0.864791	0.807138	FGF8/FGF5/FGF19	3
hsa05165	hsa05165	Human papillomavirus infection	4/89	333/8840	0.433087	0.864791	0.807138	WNT16/LAMA1/COL2A1/TERT	4
hsa04072	hsa04072	Phospholipase D signaling pathway	2/89	149/8840	0.44446	0.864791	0.807138	GRM3/DGKK	2
hsa00480	hsa00480	Glutathione metabolism	1/89	58/8840	0.445011	0.864791	0.807138	NAT8	1
hsa04923	hsa04923	Regulation of lipolysis in adipocytes	1/89	59/8840	0.450635	0.864791	0.807138	CGA	1
hsa01240	hsa01240	Biosynthesis of cofactors	2/89	153/8840	0.458038	0.864791	0.807138	MAT1A/UGT2B4	2
hsa04330	hsa04330	Notch signaling pathway	1/89	62/8840	0.467172	0.864791	0.807138	DLL3	1
hsa04148	hsa04148	Efferocytosis	2/89	156/8840	0.468097	0.864791	0.807138	HAVCR1/XKR7	2
hsa05217	hsa05217	Basal cell carcinoma	1/89	63/8840	0.472575	0.864791	0.807138	WNT16	1
hsa04020	hsa04020	Calcium signaling pathway	3/89	254/8840	0.473529	0.864791	0.807138	FGF8/FGF5/FGF19	3
hsa00561	hsa00561	Glycerolipid metabolism	1/89	65/8840	0.483217	0.864791	0.807138	DGKK	1
hsa04929	hsa04929	GnRH secretion	1/89	65/8840	0.483217	0.864791	0.807138	CGA	1
hsa05321	hsa05321	Inflammatory bowel disease	1/89	65/8840	0.483217	0.864791	0.807138	IL12RB2	1
hsa04924	hsa04924	Renin secretion	1/89	69/8840	0.50387	0.864791	0.807138	ADCYAP1	1
hsa05416	hsa05416	Viral myocarditis	1/89	69/8840	0.50387	0.864791	0.807138	LAMA1	1
hsa05225	hsa05225	Hepatocellular carcinoma	2/89	170/8840	0.513559	0.864791	0.807138	WNT16/TERT	2
hsa04917	hsa04917	Prolactin signaling pathway	1/89	71/8840	0.513888	0.864791	0.807138	CGA	1
hsa05230	hsa05230	Central carbon metabolism in cancer	1/89	71/8840	0.513888	0.864791	0.807138	HKDC1	1
hsa04622	hsa04622	RIG-I-like receptor signaling pathway	1/89	72/8840	0.518822	0.864791	0.807138	IFNK	1
hsa00562	hsa00562	Inositol phosphate metabolism	1/89	73/8840	0.523706	0.864791	0.807138	MIOX	1
hsa03018	hsa03018	RNA degradation	1/89	78/8840	0.547401	0.864791	0.807138	PNLDC1	1
hsa05133	hsa05133	Pertussis	1/89	78/8840	0.547401	0.864791	0.807138	CXCL5	1
hsa00980	hsa00980	Metabolism of xenobiotics by cytochrome P450	1/89	79/8840	0.551999	0.864791	0.807138	UGT2B4	1
hsa04721	hsa04721	Synaptic vesicle cycle	1/89	79/8840	0.551999	0.864791	0.807138	CPLX2	1
hsa04360	hsa04360	Axon guidance	2/89	184/8840	0.55644	0.864791	0.807138	LRRC4/RGMA	2
hsa00983	hsa00983	Drug metabolism - other enzymes	1/89	81/8840	0.561055	0.864791	0.807138	UGT2B4	1
hsa04911	hsa04911	Insulin secretion	1/89	86/8840	0.582912	0.864791	0.807138	ADCYAP1	1
hsa04010	hsa04010	MAPK signaling pathway	3/89	300/8840	0.58641	0.864791	0.807138	FGF8/FGF5/FGF19	3
hsa04510	hsa04510	Focal adhesion	2/89	203/8840	0.610306	0.864791	0.807138	LAMA1/COL2A1	2
hsa04912	hsa04912	GnRH signaling pathway	1/89	93/8840	0.611714	0.864791	0.807138	CGA	1
hsa05222	hsa05222	Small cell lung cancer	1/89	93/8840	0.611714	0.864791	0.807138	LAMA1	1
hsa05323	hsa05323	Rheumatoid arthritis	1/89	94/8840	0.615665	0.864791	0.807138	CXCL5	1
hsa04713	hsa04713	Circadian entrainment	1/89	97/8840	0.627281	0.864791	0.807138	ADCYAP1	1
hsa04070	hsa04070	Phosphatidylinositol signaling system	1/89	98/8840	0.631075	0.864791	0.807138	DGKK	1
hsa01522	hsa01522	Endocrine resistance	1/89	99/8840	0.634831	0.864791	0.807138	DLL3	1
hsa04640	hsa04640	Hematopoietic cell lineage	1/89	99/8840	0.634831	0.864791	0.807138	CSF3	1
hsa04750	hsa04750	Inflammatory mediator regulation of TRP channels	1/89	99/8840	0.634831	0.864791	0.807138	KNG1	1
hsa05231	hsa05231	Choline metabolism in cancer	1/89	99/8840	0.634831	0.864791	0.807138	DGKK	1
hsa05410	hsa05410	Hypertrophic cardiomyopathy	1/89	99/8840	0.634831	0.864791	0.807138	LAMA1	1
hsa00564	hsa00564	Glycerophospholipid metabolism	1/89	100/8840	0.638549	0.864791	0.807138	DGKK	1
hsa04061	hsa04061	Viral protein interaction with cytokine and cytokine receptor	1/89	100/8840	0.638549	0.864791	0.807138	CXCL5	1
hsa04916	hsa04916	Melanogenesis	1/89	101/8840	0.642229	0.864791	0.807138	WNT16	1
hsa05142	hsa05142	Chagas disease	1/89	103/8840	0.64948	0.864791	0.807138	KNG1	1
hsa05146	hsa05146	Amoebiasis	1/89	103/8840	0.64948	0.864791	0.807138	LAMA1	1
hsa05414	hsa05414	Dilated cardiomyopathy	1/89	105/8840	0.656585	0.864791	0.807138	LAMA1	1
hsa04350	hsa04350	TGF-beta signaling pathway	1/89	108/8840	0.666977	0.864791	0.807138	RGMA	1
hsa04659	hsa04659	Th17 cell differentiation	1/89	108/8840	0.666977	0.864791	0.807138	IL27	1
hsa04024	hsa04024	cAMP signaling pathway	2/89	226/8840	0.668772	0.864791	0.807138	CGA/ADCYAP1	2
hsa05145	hsa05145	Toxoplasmosis	1/89	111/8840	0.677057	0.86649	0.808724	LAMA1	1
hsa04724	hsa04724	Glutamatergic synapse	1/89	115/8840	0.69003	0.86649	0.808724	GRM3	1
hsa04928	hsa04928	Parathyroid hormone synthesis, secretion and action	1/89	115/8840	0.69003	0.86649	0.808724	SOST	1
hsa04670	hsa04670	Leukocyte transendothelial migration	1/89	116/8840	0.693192	0.86649	0.808724	CLDN6	1
hsa04668	hsa04668	TNF signaling pathway	1/89	119/8840	0.702488	0.870852	0.812796	CXCL5	1
hsa04071	hsa04071	Sphingolipid signaling pathway	1/89	122/8840	0.711505	0.874801	0.816481	KNG1	1
hsa04270	hsa04270	Vascular smooth muscle contraction	1/89	134/8840	0.744948	0.881527	0.822758	CALCB	1
hsa04210	hsa04210	Apoptosis	1/89	136/8840	0.750137	0.881527	0.822758	HRK	1
hsa00190	hsa00190	Oxidative phosphorylation	1/89	138/8840	0.755221	0.881527	0.822758	ATP12A	1
hsa04910	hsa04910	Insulin signaling pathway	1/89	138/8840	0.755221	0.881527	0.822758	HKDC1	1
hsa04371	hsa04371	Apelin signaling pathway	1/89	140/8840	0.760202	0.881527	0.822758	APLN	1
hsa05010	hsa05010	Alzheimer disease	3/89	391/8840	0.760515	0.881527	0.822758	WNT16/DKK1/SLC39A5	3
hsa04380	hsa04380	Osteoclast differentiation	1/89	142/8840	0.765084	0.881527	0.822758	TNFRSF11B	1
hsa04550	hsa04550	Signaling pathways regulating pluripotency of stem cells	1/89	144/8840	0.769867	0.881527	0.822758	WNT16	1
hsa04936	hsa04936	Alcoholic liver disease	1/89	144/8840	0.769867	0.881527	0.822758	FABP1	1
hsa04390	hsa04390	Hippo signaling pathway	1/89	157/8840	0.798693	0.898656	0.838745	WNT16	1
hsa04150	hsa04150	mTOR signaling pathway	1/89	158/8840	0.800757	0.898656	0.838745	WNT16	1
hsa05160	hsa05160	Hepatitis C	1/89	159/8840	0.802799	0.898656	0.838745	CLDN6	1
hsa05161	hsa05161	Hepatitis B	1/89	163/8840	0.810764	0.900582	0.840544	SLC10A1	1
hsa04022	hsa04022	cGMP-PKG signaling pathway	1/89	166/8840	0.816528	0.900582	0.840544	KNG1	1
hsa04530	hsa04530	Tight junction	1/89	170/8840	0.823944	0.902129	0.841987	CLDN6	1
hsa04621	hsa04621	NOD-like receptor signaling pathway	1/89	189/8840	0.855317	0.919008	0.857741	NLRP7	1
hsa04062	hsa04062	Chemokine signaling pathway	1/89	193/8840	0.86118	0.919008	0.857741	CXCL5	1
hsa04814	hsa04814	Motor proteins	1/89	197/8840	0.866809	0.919008	0.857741	MYO3A	1
hsa05022	hsa05022	Pathways of neurodegeneration - multiple diseases	3/89	483/8840	0.871843	0.919008	0.857741	WNT16/DKK1/NEFL	3
hsa05130	hsa05130	Pathogenic Escherichia coli infection	1/89	203/8840	0.874831	0.919008	0.857741	CLDN6	1
hsa05205	hsa05205	Proteoglycans in cancer	1/89	204/8840	0.876121	0.919008	0.857741	WNT16	1
hsa05417	hsa05417	Lipid and atherosclerosis	1/89	216/8840	0.890611	0.927719	0.865871	APOA1	1
hsa05166	hsa05166	Human T-cell leukemia virus 1 infection	1/89	223/8840	0.898275	0.92925	0.8673	TERT	1
hsa05171	hsa05171	Coronavirus disease - COVID-19	1/89	238/8840	0.912956	0.937968	0.875437	CSF3	1
hsa05131	hsa05131	Shigellosis	1/89	249/8840	0.922371	0.941195	0.878448	HKDC1	1
hsa05012	hsa05012	Parkinson disease	1/89	271/8840	0.938283	0.950962	0.887565	SLC39A5	1
hsa05206	hsa05206	MicroRNAs in cancer	1/89	312/8840	0.959815	0.966257	0.90184	HMGA2	1
hsa05014	hsa05014	Amyotrophic lateral sclerosis	1/89	371/8840	0.978407	0.978407	0.913179	NEFL	1
