# Supplementary material
Source: Research Square preprint supplement (doi:10.21203/rs.3.rs-9388494/v1)
Supplement: Supplementary file 4 [file e05a67fb090822da5a038988.xlsx]

## Sheet: GO
	ONTOLOGY	ID	Description	GeneRatio	BgRatio	pvalue	p.adjust	qvalue	geneID	Count	richFactor
GO:0030198	BP	GO:0030198	extracellular matrix organization	170/6492	318/18903	1.46313e-12	3.36068e-09	2.53245e-09	PHLDB1/IBSP/GPM6B/ELN/COL11A1/TIE1/BCL3/CLASP1/FSCN1/FBLN1/ITGA8/FAP/COL5A3/CPB2/COL4A4/COL19A1/COL16A1/MMP2/CCDC80/CMA1/TLL2/ABL1/MMP11/CTSG/MMP9/FERMT1/LAMA1/RGCC/MMP15/HAS3/CRISPLD2/FOXF1/ERCC2/HAS1/COMP/HPN/CAV1/PLOD3/ECM2/COL12A1/NR2E1/SMOC2/IMPG1/NID1/MMP8/TGFBI/FMOD/RECK/P4HA1/PRDX4/LRP1/COL10A1/SOX9/BMP2/TCF15/COLGALT1/PXDN/RAMP2/MATN3/MATN2/HAPLN2/POSTN/MYH11/SPINK5/LOXL2/IER3IP1/PDGFRA/…	170	0.534591
GO:0045229	BP	GO:0045229	external encapsulating structure organization	171/6492	321/18903	1.86925e-12	3.36068e-09	2.53245e-09	PHLDB1/IBSP/GPM6B/ELN/COL11A1/TIE1/BCL3/CLASP1/FSCN1/FBLN1/ITGA8/FAP/COL5A3/CPB2/COL4A4/COL19A1/COL16A1/MMP2/CCDC80/CMA1/TGM1/TLL2/ABL1/MMP11/CTSG/MMP9/FERMT1/LAMA1/RGCC/MMP15/HAS3/CRISPLD2/FOXF1/ERCC2/HAS1/COMP/HPN/CAV1/PLOD3/ECM2/COL12A1/NR2E1/SMOC2/IMPG1/NID1/MMP8/TGFBI/FMOD/RECK/P4HA1/PRDX4/LRP1/COL10A1/SOX9/BMP2/TCF15/COLGALT1/PXDN/RAMP2/MATN3/MATN2/HAPLN2/POSTN/MYH11/SPINK5/LOXL2/IER3IP1/PD…	171	0.53271
GO:0003012	BP	GO:0003012	muscle system process	228/6492	455/18903	1.89939e-12	3.36068e-09	2.53245e-09	ABCC8/GTF2IRD1/JARID2/PIK3C2A/EHD3/IGF1/ATP1A2/MAP2K3/MYOC/MYOM2/DSG2/PTGER3/CYBA/KCNH2/PKP2/CAMK2B/ATP2B4/MYLK/CACNB1/ROCK1/HDAC4/MEF2A/ABCC9/LMCD1/PTGS2/ENO1/TACR2/PPP1R12B/KCNN2/ARG2/GNAO1/SMPX/MYL6/HMOX1/SLC8A3/PABPN1/MYLK2/MYL9/SNTA1/MYOM1/SMAD7/HTR2A/PPP1R13L/DMPK/TNNT1/COMP/SCN1B/CAV1/EZH2/ACTA2/P2RX1/CAMTA2/SGCA/CACNG1/MYH3/CRYAB/KCNA1/SRF/PDE4D/NUP155/TNNC1/FOXP1/TACR1/IGFBP5/ERRFI1/RGS2…	228	0.501099
GO:0043062	BP	GO:0043062	extracellular structure organization	170/6492	319/18903	2.07802e-12	3.36068e-09	2.53245e-09	PHLDB1/IBSP/GPM6B/ELN/COL11A1/TIE1/BCL3/CLASP1/FSCN1/FBLN1/ITGA8/FAP/COL5A3/CPB2/COL4A4/COL19A1/COL16A1/MMP2/CCDC80/CMA1/TLL2/ABL1/MMP11/CTSG/MMP9/FERMT1/LAMA1/RGCC/MMP15/HAS3/CRISPLD2/FOXF1/ERCC2/HAS1/COMP/HPN/CAV1/PLOD3/ECM2/COL12A1/NR2E1/SMOC2/IMPG1/NID1/MMP8/TGFBI/FMOD/RECK/P4HA1/PRDX4/LRP1/COL10A1/SOX9/BMP2/TCF15/COLGALT1/PXDN/RAMP2/MATN3/MATN2/HAPLN2/POSTN/MYH11/SPINK5/LOXL2/IER3IP1/PDGFRA/…	170	0.532915
GO:0006936	BP	GO:0006936	muscle contraction	182/6492	351/18903	8.23428e-12	1.06535e-08	8.02798e-09	PIK3C2A/EHD3/ATP1A2/MAP2K3/MYOM2/DSG2/PTGER3/KCNH2/PKP2/ATP2B4/MYLK/CACNB1/ROCK1/ABCC9/PTGS2/ENO1/TACR2/PPP1R12B/KCNN2/ARG2/GNAO1/SMPX/MYL6/SLC8A3/PABPN1/MYLK2/MYL9/SNTA1/MYOM1/SMAD7/HTR2A/PPP1R13L/DMPK/TNNT1/COMP/SCN1B/CAV1/ACTA2/P2RX1/SGCA/CACNG1/MYH3/CRYAB/KCNA1/SRF/PDE4D/NUP155/TNNC1/TACR1/RGS2/TNNI3K/TNNT2/CASQ2/MYOT/ADRA1A/TBX2/KCNJ8/CXCR4/CALD1/SSPN/NR4A1/BBS2/MYH2/TMOD2/FGF13/TNNI3/KCNA5/…	182	0.518519
GO:0010959	BP	GO:0010959	regulation of metal ion transport	209/6492	423/18903	8.18559e-11	8.82543e-08	6.65043e-08	HECW1/CALCR/ABCC8/CX3CL1/FYN/EHD3/CNTN1/ATP1A2/FHL1/KCNG1/BAK1/HOMER3/CYBA/PRSS8/KCNH2/PKP2/CAMK2B/ATP2B4/WNK1/SPHK2/ATP2C2/MYLK/CACNB1/ABCC9/GAL/GNB5/CAMK2A/PTGS2/ACTN2/ADCYAP1R1/KCNN2/NKAIN1/BAX/REM1/FKBP1A/P2RX7/SLC8B1/JPH4/TREM2/ABL1/PDGFB/BDKRB1/NKAIN4/SNTA1/EPPIN/HTR2A/CEMIP/DMPK/SCN1B/CAV1/CXCL12/PPP3CB/P2RX1/CCL2/CACNG1/RCVRN/WFS1/KCNA1/IFNG/PTPN6/PDE4D/HES1/KCNIP3/GRIN3B/OPRD1/CASQ2/PKD2…	209	0.49409
GO:0060537	BP	GO:0060537	muscle tissue development	208/6492	422/18903	1.19568e-10	1.08836e-07	8.20139e-08	SOX8/LUC7L/JARID2/TFAP2B/IGF1/DSG2/ELN/PKP2/COL11A1/CDON/HMG20B/ERBB3/MYLK/MEF2A/PITX1/TGFBR3/RARB/SIRT6/ACTN2/ITGA8/TP73/MEF2C/LRP2/COL19A1/KCNK2/FKBP1A/TBX5/MYL6/TLL2/ABL1/SIX4/ASB2/MYLK2/SMAD7/FGF9/SGCG/EYA1/PPP1R13L/CAV1/WNT2/MEOX2/ZFAND5/PPP3CB/BMPR1A/FGF8/NEURL1/DKK1/KAT2A/CNTNAP1/HLF/PRKAR1A/IFT20/PPARGC1A/SOX6/GLI1/BMP5/RBM24/BVES/SRF/TBX18/HAND1/TNNC1/FOXP1/IGFBP5/ID2/MEF2D/RGS2/ACADM/PR…	208	0.492891
GO:0072001	BP	GO:0072001	renal system development	164/6492	318/18903	1.5109e-10	1.08836e-07	8.20139e-08	SOX8/ITGA3/TFAP2B/PKD1/WWTR1/CC2D2A/PRDM1/SEC61A1/FGF10/NLE1/GLI2/NOTCH3/ACAT1/PAX2/RARB/ITGA8/TP73/COL4A4/ARG2/MEF2C/LRP2/HSPB11/AKR1B1/BAX/CYP26A1/PCSK5/AP1B1/PDGFB/SIX4/MMP9/SMAD7/FOXF1/SALL1/EYA1/CALB1/SFRP1/GATA3/ACTA2/FGF8/IFT20/WFS1/ZBTB16/TNS2/NUP107/SIM1/PTK7/TBX18/HES1/ACVR2B/STAT1/WNT6/ODC1/EPHA4/NID1/APH1A/PROX1/CENPF/TCF21/PKD2/EPCAM/HELLS/TEK/EGR1/KCNJ8/CAT/HOXC11/SOX4/SOX9/NUP85/PA…	164	0.515723
GO:1904062	BP	GO:1904062	regulation of cation transmembrane transport	196/6492	394/18903	1.51418e-10	1.08836e-07	8.20139e-08	HECW1/CALCR/ABCC8/CX3CL1/MAPK8IP2/FYN/EHD3/ATP1A2/FHL1/KCNG1/BAK1/CYBA/KCNH2/RASGRF1/ATP2B4/WNK1/SPHK2/CACNB1/ABCC9/GAL/GNB5/CACNG4/ACTN2/ADCYAP1R1/KCNN2/MEF2C/BAX/REM1/FKBP1A/P2RX7/JPH4/TREM2/ABL1/HCN2/BDKRB1/MMP9/SNTA1/CEMIP/GRIN2D/SCN1B/CAV1/PPP3CB/PPIF/P2RX1/CCL2/CACNG1/TCIRG1/KCNA1/SLC38A1/IFNG/PTPN6/PDE4D/KCNIP3/RGS2/CASQ2/PKD2/PPP3CC/RAMP3/PLP1/KCNS1/AHNAK/OPRL1/WNK4/HSPA2/ATP1B2/FGF13/DPP…	196	0.497462
GO:0007548	BP	GO:0007548	sex differentiation	151/6492	288/18903	1.70771e-10	1.10472e-07	8.32465e-08	FKBP4/SOX8/PKD1/CSDE1/BAK1/ARID4A/HSPA5/KITLG/PTPRN/DMRT3/ASB1/ASPM/FGF10/TP63/ADCYAP1R1/LRP2/PGR/ATRX/BAX/MMP2/TFAP2C/ESR1/TYRO3/MSH2/SIRT1/SIX4/HNF4A/GATA1/CENPI/FGF9/SALL1/ACSBG1/SFRP1/LHB/AMH/TFPT/LFNG/HOXA13/CASP2/NUDT1/GATA3/BMPR1A/FGF8/CCND1/NUP107/BMP5/IL1A/DHCR24/TCF21/FOXO3/KIF18A/INHBA/PRDX4/TNFAIP6/INHA/MEA1/EREG/SOX9/EIF2S2/KDR/VGF/BCL2L2/MAS1/TAF4/HSD17B3/RARA/NASP/WNT2B/PDGFRA/CGA/…	151	0.524306
GO:0001655	BP	GO:0001655	urogenital system development	181/6492	360/18903	2.56649e-10	1.50933e-07	1.13736e-07	FKBP4/SOX8/ITGA3/TFAP2B/PKD1/WWTR1/CC2D2A/PRDM1/SEC61A1/FGF10/TP63/NLE1/GLI2/NOTCH3/ACAT1/PAX2/RARB/ITGA8/TP73/COL4A4/ARG2/MEF2C/LRP2/HSPB11/AKR1B1/BAX/MMP2/ESR1/CYP26A1/PCSK5/AP1B1/PDGFB/SIX4/MMP9/SMAD7/FOXF1/SALL1/EYA1/CALB1/SFRP1/AMH/HOXA13/GATA3/ACTA2/FGF8/IFT20/WFS1/ZBTB16/TNS2/GLI1/NUP107/SIM1/PTK7/TBX18/HES1/ACVR2B/STAT1/WNT6/ODC1/EPHA4/NID1/APH1A/PROX1/CENPF/TCF21/PKD2/EPCAM/HELLS/TEK/EGR…	181	0.502778
GO:0001822	BP	GO:0001822	kidney development	159/6492	309/18903	3.56106e-10	1.91971e-07	1.4466e-07	SOX8/ITGA3/TFAP2B/PKD1/WWTR1/CC2D2A/PRDM1/SEC61A1/FGF10/NLE1/GLI2/NOTCH3/ACAT1/PAX2/RARB/ITGA8/TP73/COL4A4/ARG2/MEF2C/LRP2/HSPB11/AKR1B1/BAX/CYP26A1/PCSK5/AP1B1/PDGFB/SIX4/MMP9/SMAD7/SALL1/EYA1/CALB1/SFRP1/GATA3/ACTA2/FGF8/IFT20/WFS1/ZBTB16/TNS2/NUP107/SIM1/PTK7/HES1/ACVR2B/STAT1/WNT6/ODC1/EPHA4/NID1/APH1A/PROX1/CENPF/TCF21/PKD2/EPCAM/HELLS/TEK/EGR1/KCNJ8/CAT/HOXC11/SOX4/SOX9/NUP85/PAX8/BMP2/WNK4…	159	0.514563
GO:0030900	BP	GO:0030900	forebrain development	189/6492	383/18903	7.41609e-10	3.69036e-07	2.78088e-07	KDM1A/ARX/PAFAH1B1/FYN/TACC3/ATP1A2/UBA6/CDH1/PHLPP2/RTN4R/ATP2B4/CDON/ASPM/PITX1/FGF10/GLI2/NOTCH3/SEMA3A/WDR62/RARB/PCM1/OPHN1/DCT/LRP2/ATRX/BAX/LHX5/TYRO3/EFNA2/E2F1/SALL1/NUMBL/ATP1A3/DLX5/OGDH/GHRHR/EZH2/LHX2/LHX6/AKNA/LHX3/CXCL12/BMPR1A/FGF8/DKK1/KAT2A/EZH1/MDK/GLI1/KCNA1/PHACTR1/NR2E1/SRF/HES1/PLXNA1/FOXP1/OTX1/ID2/RAB3GAP1/DLX2/VAX2/CHD5/PROX1/KIF14/NRP2/CXCR4/INHBA/STIL/BBS2/MBOAT7/BMP2/…	189	0.493473
GO:0042692	BP	GO:0042692	muscle cell differentiation	199/6492	409/18903	1.18778e-09	5.4884e-07	4.1358e-07	KDM1A/SPAG9/PTBP1/IGF1/PLEKHO1/EHD2/MYOM2/PRDM6/CDON/HDAC4/MEF2A/ATP11A/RORA/FGF10/ACTN1/SPEG/NFATC3/RARB/SIRT6/ACTN2/ITGA8/MEF2C/SMARCD3/TBX5/SIRT1/PDGFB/SIX4/ASB2/NFATC4/NFATC2/MYL9/LAMA1/FGF9/FOXF1/DMPK/TNNT1/OLFM2/DYRK1B/CEACAM5/COMP/ZNHIT1/EZH2/PPP3CB/BMPR1A/DKK1/KAT2A/CNTNAP1/HDAC5/PRKAR1A/MYH3/IFT20/CD81/SOX6/SOD2/RBM24/BVES/QKI/SRF/TBX18/HES1/FOXP1/TANC1/IGFBP5/ID2/RGS2/NID1/ACADM/PROX1/T…	199	0.486553
GO:0046660	BP	GO:0046660	female sex differentiation	75/6492	124/18903	2.2688e-09	9.78456e-07	7.37319e-07	BAK1/HSPA5/KITLG/PTPRN/FGF10/TP63/ADCYAP1R1/LRP2/PGR/BAX/MMP2/ESR1/TYRO3/SIRT1/ACSBG1/SFRP1/AMH/LFNG/CASP2/NUP107/FOXO3/INHBA/TNFAIP6/INHA/EREG/KDR/VGF/TAF4/PDGFRA/CGA/AMHR2/NR5A1/STRA6/LHCGR/BMPR1B/BRCA2/SCAPER/SMAD4/LHX9/SLIT2/SRD5A1/GNRH1/ATM/ARID5B/ADAMTS1/MMP14/KIT/INHBB/TIPARP/PTX3/NOS3/SGPL1/AXL/ZFPM2/FSHR/CHD7/BCL2L1/BCL2/STAT5B/FZD4/GPR149/A2M/UMODL1/ZFP42/FOXL2/SLIT3/WT1/FANCA/ZP3/SRC/A…	75	0.604839
GO:0007088	BP	GO:0007088	regulation of mitotic nuclear division	72/6492	118/18903	2.74516e-09	1.04864e-06	7.90206e-07	MAD1L1/IGF1/CUL3/SPDL1/CUL7/TRIP13/NDC80/AURKA/BIRC5/PDGFB/RGCC/HOXA13/FGF8/FBXO5/TTK/IL1A/MAD2L2/CDC20/NEK2/CENPF/DUSP1/ZWINT/EREG/XRCC3/DLGAP5/PKMYT1/CCNB1/CDCA8/APC/ESPL1/BORA/DMRT1/NUSAP1/KIF20B/TOM1L1/ANAPC11/NUF2/MKI67/ATM/INCENP/CHEK1/SPC25/BUB3/FBXO43/BUB1B/CDC25C/SPC24/TGFA/MAD2L1/PRAP1/PLK1/IGF2/CDT1/BUB1/NME6/MTBP/ZWILCH/BTC/TOM1L2/AURKAIP1/SPHK1/GEN1/CD28/AURKB/RCC1/KNTC1/CDCA2/L3MBTL…	72	0.610169
GO:0007411	BP	GO:0007411	axon guidance	125/6492	236/18903	2.75574e-09	1.04864e-06	7.90206e-07	SEMA3F/ARX/MYCBP2/SEMA3G/FYN/LYPLA2/CNTN1/EPHA3/LAMA3/LAMC2/NTN1/NEO1/EPHA8/GLI2/NOTCH3/SEMA3A/PLXNA2/OPHN1/EPHA6/IGSF9/NRCAM/DPYSL2/SEMA4G/EFNA2/RPS6KA5/LAMA1/MEGF8/SCN1B/DLX5/LHX2/LHX3/GATA3/CXCL12/UNC5B/LGI1/WNT3/PLXNA1/EPHA4/ARTN/NRP2/KLF7/MYOT/LHX4/EGR2/FEZF1/PALLD/PLXNA3/VSTM2L/LGR6/EPHB2/NOTCH2/EPHA7/SEMA4F/NKX2-1/TBR1/SEMA6D/MYPN/BMPR1B/SMAD4/ERBB2/EPHA2/LHX9/EFNA3/CNTN4/BOC/SLIT2/EPHA5/G…	125	0.529661
GO:0044703	BP	GO:0044703	multi-organism reproductive process	113/6492	209/18903	3.3603e-09	1.20765e-06	9.10031e-07	FKBP4/ITGA3/ABCC8/TEAD3/PRDM1/SPHK2/EPN1/DAZAP1/PTGS2/FBLN1/PGR/EPYC/COL16A1/TMED2/MMP2/PTHLH/ESR1/PCSK5/MMP9/TLE6/SYDE1/PLA2G4C/KLF1/AMBP/RLN2/RLN1/P2RX1/CYP27B1/SLC38A1/UMPS/TACR1/IGFBP2/IGFBP5/ASH1L/RGS2/SPP1/PGF/TGFB3/PRLHR/ADCY7/PTGFR/RECK/SEMG1/POLR1B/FOSB/APOL2/LIF/KLK14/PARP2/EPO/TRIM28/IDO1/RARA/ITGB4/MEN1/SLC38A2/DSG1/CYP1A1/ADCYAP1/CORIN/CRHBP/PAM/CRH/A1CF/ADRA2A/DEDD/STC1/GIP/TPPP3/AG…	113	0.54067
GO:0097485	BP	GO:0097485	neuron projection guidance	125/6492	237/18903	3.87066e-09	1.29933e-06	9.79116e-07	SEMA3F/ARX/MYCBP2/SEMA3G/FYN/LYPLA2/CNTN1/EPHA3/LAMA3/LAMC2/NTN1/NEO1/EPHA8/GLI2/NOTCH3/SEMA3A/PLXNA2/OPHN1/EPHA6/IGSF9/NRCAM/DPYSL2/SEMA4G/EFNA2/RPS6KA5/LAMA1/MEGF8/SCN1B/DLX5/LHX2/LHX3/GATA3/CXCL12/UNC5B/LGI1/WNT3/PLXNA1/EPHA4/ARTN/NRP2/KLF7/MYOT/LHX4/EGR2/FEZF1/PALLD/PLXNA3/VSTM2L/LGR6/EPHB2/NOTCH2/EPHA7/SEMA4F/NKX2-1/TBR1/SEMA6D/MYPN/BMPR1B/SMAD4/ERBB2/EPHA2/LHX9/EFNA3/CNTN4/BOC/SLIT2/EPHA5/G…	125	0.527426
GO:0061458	BP	GO:0061458	reproductive system development	156/6492	310/18903	4.0171e-09	1.29933e-06	9.79116e-07	FKBP4/SOX8/PKD1/CSDE1/BAK1/ARID4A/HSPA5/KITLG/PTPRN/ASB1/ASPM/FGF10/TP63/LRP2/PGR/ATRX/BAX/MMP2/TFAP2C/ESR1/TYRO3/MSH2/SIRT1/SIX4/GATA1/FGF9/SALL1/ACSBG1/SFRP1/LHB/AMH/TFPT/LFNG/HOXA13/CASP2/NUDT1/GATA3/FGF8/CCND1/GLI1/NUP107/BMP5/IL1A/DHCR24/ASH1L/TCF21/FOXO3/KIF18A/INHBA/PRDX4/TNFAIP6/INHA/MEA1/EREG/SOX9/C3/EIF2S2/KDR/VGF/BCL2L2/MAS1/TAF4/HSD17B3/RARA/SERPINF1/NASP/WNT2B/PDGFRA/ANXA1/CGA/AMHR2/…	156	0.503226
GO:0051783	BP	GO:0051783	regulation of nuclear division	84/6492	145/18903	4.84422e-09	1.43518e-06	1.08149e-06	MAD1L1/IGF1/CUL3/SPDL1/CUL7/RPS6KA2/TRIP13/NDC80/AURKA/BIRC5/PDGFB/RGCC/HOXA13/FGF8/RAD51AP1/FBXO5/TTK/IL1A/MAD2L2/CDC20/NEK2/CENPF/DUSP1/ZWINT/EREG/XRCC3/DLGAP5/PRDM7/PKMYT1/LIF/CCNB1/CDCA8/APC/ESPL1/BORA/DMRT1/NUSAP1/KIF20B/TOM1L1/ANAPC11/NUF2/HORMAD1/STRA8/MKI67/ATM/INCENP/CHEK1/SPC25/BUB3/FBXO43/BUB1B/CDC25C/SPC24/MSX1/TGFA/MAD2L1/PRDM9/PRAP1/PLK1/IGF2/CDT1/BUB1/NME6/MTBP/PDE3A/ZWILCH/BTC/TOM…	84	0.57931
GO:0048608	BP	GO:0048608	reproductive structure development	154/6492	306/18903	5.00477e-09	1.43518e-06	1.08149e-06	FKBP4/SOX8/PKD1/CSDE1/BAK1/ARID4A/HSPA5/KITLG/PTPRN/ASB1/ASPM/FGF10/TP63/LRP2/PGR/ATRX/BAX/MMP2/TFAP2C/ESR1/TYRO3/MSH2/SIRT1/SIX4/GATA1/FGF9/SALL1/ACSBG1/SFRP1/LHB/AMH/TFPT/LFNG/HOXA13/CASP2/NUDT1/GATA3/FGF8/CCND1/GLI1/NUP107/BMP5/IL1A/DHCR24/ASH1L/TCF21/FOXO3/KIF18A/INHBA/PRDX4/TNFAIP6/INHA/MEA1/EREG/SOX9/C3/EIF2S2/KDR/VGF/BCL2L2/MAS1/TAF4/HSD17B3/RARA/SERPINF1/NASP/WNT2B/PDGFRA/ANXA1/CGA/AMHR2/…	154	0.503268
GO:0010948	BP	GO:0010948	negative regulation of cell cycle process	159/6492	318/18903	5.10267e-09	1.43518e-06	1.08149e-06	MAD1L1/CRY1/BRCA1/FHL1/NSUN2/SPDL1/RAD51/FOXN3/RPS6KA2/TRIP13/TIPIN/GTSE1/JADE1/THOC1/RBL1/NDC80/CDC14B/ATRX/ORC1/BIRC5/WDR76/CLSPN/CDC45/CDC6/MSH2/SUSD2/TELO2/TTI1/E2F1/NAA10/RGCC/FBXO31/RBL2/CASP2/EZH2/CDK5RAP3/CCL2/KAT2A/CCND1/MDM1/TIMELESS/FBXO5/TTK/CCNG1/BCL6/KAT2B/FBXO6/MAD2L2/MIIP/CDC20/NEK2/PROX1/CENPF/PKD2/DUSP1/INHBA/ZWINT/CDK2/CDKN1A/KIF25/XRCC3/LIF/E2F8/STK33/MEN1/CCNB1/CDCA8/CLOCK/AP…	159	0.5
GO:1901987	BP	GO:1901987	regulation of cell cycle phase transition	214/6492	453/18903	6.80215e-09	1.83346e-06	1.38161e-06	MAD1L1/KMT2E/DBF4/CRY1/PKD1/DPF1/ANLN/BRCA1/BID/FHL1/CUL3/NSUN2/SPDL1/RAD51/FOXN3/ATP2B4/SMARCD1/FGF10/TRIP13/TIPIN/GTSE1/ACTB/JADE1/THOC1/SMARCA2/RBL1/NDC80/CDC14B/SMARCD3/ORC1/AURKA/BIRC5/TFAP4/WDR76/CLSPN/CDC45/CDC6/MSH2/CDC7/SMARCB1/SUSD2/TELO2/PSME2/CDC25B/TTI1/E2F1/FAM83D/RGCC/FBXO31/RBL2/ERCC2/CASP2/EZH2/CDK5RAP3/SMARCD2/CCL2/CCND1/GLI1/TIMELESS/PTPN6/FBXO5/TTK/CCNG1/HYAL1/ID2/FBXO6/MAD2L2…	214	0.472406
GO:0044772	BP	GO:0044772	mitotic cell cycle phase transition	222/6492	473/18903	7.10734e-09	1.83909e-06	1.38586e-06	MAD1L1/KMT2E/FBXL3/DBF4/PKD1/DPF1/ANLN/BRCA1/TACC3/BID/FHL1/CUL3/SPDL1/FOXN3/CDK17/BCAT1/SMARCD1/FGF10/CAMK2A/TRIP13/CLASP1/GTSE1/ACTB/JADE1/SMARCA2/RBL1/NDC80/CDC14B/SMARCD3/ABCB1/ORC1/AURKA/BIRC5/TFAP4/CLSPN/CDC6/CDC7/CDC34/SMARCB1/CDKN3/PSME2/CDC25B/E2F1/CDK16/RGCC/FBXO31/RBL2/ERCC2/CCNE1/CASP2/EZH2/UBE2S/CDK5RAP3/SMARCD2/CCL2/CCND1/FOXM1/PTPN6/TPD52L1/FBXO5/E2F3/TTK/CCNG1/HYAL1/ID2/MAD2L2/MII…	222	0.469345
GO:0051784	BP	GO:0051784	negative regulation of nuclear division	44/6492	63/18903	9.41776e-09	2.30151e-06	1.73431e-06	MAD1L1/SPDL1/RPS6KA2/TRIP13/NDC80/BIRC5/FBXO5/TTK/MAD2L2/CDC20/CENPF/DUSP1/ZWINT/XRCC3/LIF/CCNB1/CDCA8/APC/DMRT1/TOM1L1/NUF2/HORMAD1/ATM/INCENP/CHEK1/SPC25/BUB3/FBXO43/BUB1B/SPC24/MAD2L1/PRAP1/PLK1/CDT1/BUB1/NME6/MTBP/ZWILCH/TOM1L2/AURKAIP1/GEN1/AURKB/KNTC1/LCMT1	44	0.698413
GO:0046661	BP	GO:0046661	male sex differentiation	95/6492	171/18903	9.60592e-09	2.30151e-06	1.73431e-06	FKBP4/SOX8/CSDE1/ARID4A/KITLG/DMRT3/ASB1/ASPM/FGF10/LRP2/ATRX/BAX/TFAP2C/ESR1/MSH2/SIX4/GATA1/FGF9/SFRP1/LHB/AMH/TFPT/HOXA13/NUDT1/GATA3/BMPR1A/FGF8/CCND1/BMP5/IL1A/DHCR24/TCF21/KIF18A/INHBA/PRDX4/INHA/MEA1/SOX9/EIF2S2/BCL2L2/MAS1/HSD17B3/RARA/NASP/WNT2B/PDGFRA/AMHR2/NKX2-1/BRIP1/NR5A1/RNF38/DMRT1/LHCGR/CYP1B1/DHH/ADAM21/SCAPER/GATA6/GREB1L/SMAD4/LHX9/ADAM15/SFRP2/SRD5A1/ARID5B/DHX37/FER/GFRA1/BC…	95	0.555556
GO:0007389	BP	GO:0007389	pattern specification process	220/6492	472/18903	1.69691e-08	3.92047e-06	2.95428e-06	SEMA3F/MEOX1/MKS1/HOXC8/CC2D2A/DMRT3/CDON/HES2/LRP6/FGF10/TP63/NLE1/GLI2/WNT8B/PAX2/PLXNA2/MEF2C/LRP2/HSPB11/SMARCD3/PALB2/TMED2/AURKA/TBX5/CHRD/DLL3/TLL2/PCSK5/MFNG/LRP5L/AP1B1/ASB2/CHRDL1/FOXF1/CLUAP1/EYA1/SFRP1/MEGF8/DNAH11/WNT2/LFNG/MEOX2/LHX2/LHX3/BMPR1A/FGF8/DKK1/WNT3/HOXB6/KAT2A/NKX3-2/ZBTB16/FOLR1/GLI1/BMP5/MDFI/SRF/TBX18/HAND1/IRX4/CDX1/HES1/ACVR2B/OTX1/WNT6/DLX2/VAX2/WLS/KMT2A/NRP2/PKD2…	220	0.466102
GO:1903522	BP	GO:1903522	regulation of blood circulation	134/6492	263/18903	1.86061e-08	4.15044e-06	3.12758e-06	EHD3/ATP1A2/DSG2/CELF2/KCNH2/PKP2/ATP2B4/ATP2B3/MEF2A/ABCC9/SREBF1/PTGS2/ATP2A3/KCNN2/MMP2/TBX5/JAK2/ABL1/HCN2/SLC8A3/SNTA1/SMAD7/HTR2A/DMPK/ATP1A3/SCN1B/CAV1/P2RX1/IL2/GLP1R/BVES/TBX18/HBEGF/PDE4D/NUP155/TACR1/RGS2/TNNI3K/FAAH/SLC8A2/TNNT2/CASQ2/ADRA1A/TBX2/POPDC2/THRA/AVPR2/ADM2/ATP1B2/FGF13/TNNI3/KCNA5/HRC/TRPM4/PER2/CHRM3/SPX/MTNR1B/CYP2J2/DSC2/P2RX4/HEY2/MDM2/EDNRB/BIN1/HCN4/PDE5A/FOXN4/TPM1…	134	0.509506
GO:0007517	BP	GO:0007517	muscle organ development	169/6492	348/18903	2.45427e-08	4.96418e-06	3.74078e-06	SOX8/LUC7L/IGF1/FHL1/USP2/ELN/PKP2/COL11A1/CDON/HMG20B/ERBB3/MYLK/MEF2A/PITX1/TGFBR3/SPEG/EVC/MEF2C/LRP2/COL19A1/FKBP1A/MYL6/TLL2/SIRT1/CHKB/SIX4/ASB2/MYLK2/SMAD7/SGCG/CAV1/WNT2/MEOX2/PPP3CB/BMPR1A/FGF8/NEURL1/CNTNAP1/SGCA/HLF/MYH3/CRYAB/SOX6/RBM24/BVES/HBEGF/HAND1/TNNC1/MEF2D/PROX1/CENPF/TNNT2/TCF21/EGR1/POPDC2/EGR2/NLN/NR4A1/GPCPD1/BMP2/TCF15/SIX1/SGCE/LIF/MYOD1/TNNI3/POPDC3/ITGA7/HEY2/CHRND/UQ…	169	0.485632
GO:0150063	BP	GO:0150063	visual system development	187/6492	392/18903	2.45543e-08	4.96418e-06	3.74078e-06	WNT16/ABCB5/SOX8/TFAP2B/VIM/BAK1/CC2D2A/RCN1/LAMC3/PRDM1/ATP2B4/CDON/FGF10/PAX2/RARB/CRYBG3/SMARCD3/GRHL2/BAX/DZANK1/RPGRIP1/CRYBB3/LRP5L/VSX1/BIRC7/CELF4/LAMA1/CHRDL1/RS1/FGF9/RP1/CALB1/PPP1R13L/SLC17A7/SIPA1L3/SMG9/WNT2/CASP2/LHX2/GATA3/PITX3/CRYBA1/B9D1/CRYAB/TCIRG1/MDM1/NR2E1/SRF/HES1/ACVR2B/CLCN2/EFEMP1/WNT6/RAB3GAP1/DLX2/VAX2/MFN2/MFAP2/PROX1/CRYGD/TBX2/INHBA/SOX9/C3/RHOJ/SMARCA4/GNGT1/KDR/…	187	0.477041
GO:0045137	BP	GO:0045137	development of primary sexual characteristics	123/6492	238/18903	2.45562e-08	4.96418e-06	3.74078e-06	SOX8/CSDE1/ARID4A/HSPA5/KITLG/PTPRN/ASPM/ADCYAP1R1/LRP2/PGR/ATRX/BAX/MMP2/TFAP2C/ESR1/MSH2/SIRT1/SIX4/GATA1/FGF9/SALL1/ACSBG1/SFRP1/LHB/AMH/TFPT/LFNG/CASP2/NUDT1/GATA3/FGF8/CCND1/NUP107/IL1A/TCF21/FOXO3/KIF18A/INHBA/PRDX4/TNFAIP6/INHA/MEA1/EREG/SOX9/EIF2S2/KDR/VGF/BCL2L2/MAS1/TAF4/RARA/NASP/WNT2B/PDGFRA/CGA/AMHR2/NKX2-1/BRIP1/NR5A1/RNF38/DMRT1/LHCGR/CYP1B1/BMPR1B/DHH/BRCA2/ADAM21/SCAPER/GATA6/SMA…	123	0.516807
GO:0045786	BP	GO:0045786	negative regulation of cell cycle	192/6492	405/18903	2.88879e-08	5.6629e-06	4.2673e-06	MAD1L1/CRY1/BRCA1/FHL1/NSUN2/SPDL1/RAD51/FOXN3/RPS6KA2/TRIP13/NLE1/PTGS2/TIPIN/GTSE1/JADE1/THOC1/RBL1/NDC80/CDC14B/ATRX/ORC1/PPP1R13B/BIRC5/TFAP4/WDR76/CLSPN/CDC45/CDC6/MSH2/SIRT1/ABL1/SUSD2/TELO2/CDK5RAP1/TTI1/E2F1/SUV39H1/NAA10/RGCC/FBXO31/RBL2/CASP2/EZH2/GATA3/CDK5RAP3/CCL2/KAT2A/CCND1/MDM1/TIMELESS/FBXO5/GMNN/TTK/CCNG1/BCL6/KAT2B/FBXO6/MAD2L2/MIIP/CDC20/NEK2/PROX1/CENPF/TNFAIP3/PKD2/DUSP1/INH…	192	0.474074
GO:0001654	BP	GO:0001654	eye development	185/6492	388/18903	3.04791e-08	5.79909e-06	4.36993e-06	WNT16/ABCB5/SOX8/TFAP2B/VIM/BAK1/CC2D2A/RCN1/LAMC3/PRDM1/ATP2B4/CDON/FGF10/PAX2/RARB/CRYBG3/SMARCD3/GRHL2/BAX/DZANK1/RPGRIP1/CRYBB3/LRP5L/VSX1/BIRC7/CELF4/LAMA1/CHRDL1/RS1/FGF9/RP1/CALB1/PPP1R13L/SLC17A7/SIPA1L3/SMG9/WNT2/CASP2/LHX2/GATA3/PITX3/CRYBA1/B9D1/CRYAB/TCIRG1/MDM1/NR2E1/SRF/HES1/ACVR2B/CLCN2/EFEMP1/WNT6/RAB3GAP1/DLX2/VAX2/MFN2/MFAP2/PROX1/CRYGD/TBX2/INHBA/SOX9/RHOJ/SMARCA4/GNGT1/KDR/SCO…	185	0.476804
GO:0048880	BP	GO:0048880	sensory system development	189/6492	398/18903	3.16407e-08	5.8481e-06	4.40686e-06	WNT16/ABCB5/SOX8/TFAP2B/VIM/BAK1/CC2D2A/RCN1/LAMC3/PRDM1/ATP2B4/CDON/FGF10/SEMA3A/PAX2/RARB/CRYBG3/SMARCD3/GRHL2/BAX/DZANK1/RPGRIP1/CRYBB3/LRP5L/VSX1/BIRC7/CELF4/LAMA1/CHRDL1/RS1/FGF9/RP1/CALB1/PPP1R13L/SLC17A7/SIPA1L3/SMG9/WNT2/CASP2/LHX2/GATA3/PITX3/CRYBA1/B9D1/CRYAB/TCIRG1/MDM1/NR2E1/SRF/HES1/ACVR2B/CLCN2/EFEMP1/WNT6/RAB3GAP1/DLX2/VAX2/MFN2/MFAP2/PROX1/CRYGD/TBX2/INHBA/SOX9/C3/RHOJ/SMARCA4/GNG…	189	0.474874
GO:0001666	BP	GO:0001666	response to hypoxia	147/6492	296/18903	3.32952e-08	5.97809e-06	4.50481e-06	NOS2/CYBA/RORA/TGFBR3/TFRC/PTGS2/ENO1/KCNK2/PLOD1/MMP2/TREM2/SIRT1/HMOX1/SLC8A3/TM9SF4/E2F1/AHCY/SUV39H1/PGK1/RGCC/SFRP1/CAV1/TBL2/CA9/CXCL12/SOD3/CRYAB/SOD2/SRF/SCAP/IL1A/NFE2L2/EPHA4/OPRD1/MPL/FOXO3/PGF/TGFB3/DNMT3A/EGR1/CAT/CXCR4/PLAU/WDR83/PTGIS/HIF3A/BMP2/GNGT1/AJUBA/CBFA2T3/KCNA5/EPO/JUND/LOXL2/VHL/ROCK2/HILPDA/MDM2/BRIP1/SLC2A8/MYC/CPEB2/TLR2/MGARP/THBS1/ACVRL1/PML/CYP1A1/MYOCD/GATA6/RPTOR…	147	0.496622
GO:0044706	BP	GO:0044706	multi-multicellular organism process	114/6492	218/18903	3.41922e-08	5.97809e-06	4.50481e-06	FKBP4/ITGA3/ABCC8/TEAD3/PRDM1/SPHK2/EPN1/DAZAP1/PTGS2/FBLN1/PGR/EPYC/COL16A1/TMED2/MMP2/PTHLH/ESR1/PCSK5/ACR/MMP9/TLE6/SYDE1/PLA2G4C/KLF1/AMBP/RLN2/RLN1/P2RX1/CYP27B1/SLC38A1/UMPS/TACR1/IGFBP2/IGFBP5/ASH1L/RGS2/SPP1/PGF/TGFB3/PRLHR/ADCY7/PTGFR/RECK/SEMG1/POLR1B/FOSB/APOL2/LIF/KLK14/PARP2/EPO/TRIM28/IDO1/RARA/ITGB4/MEN1/SLC38A2/DSG1/CYP1A1/ADCYAP1/CORIN/CRHBP/PAM/CRH/A1CF/ADRA2A/DEDD/STC1/GIP/TPPP…	114	0.522936
GO:0000075	BP	GO:0000075	cell cycle checkpoint signaling	100/6492	186/18903	3.83734e-08	6.53257e-06	4.92264e-06	MAD1L1/CRY1/BRCA1/NSUN2/SPDL1/RAD51/FOXN3/TRIP13/TIPIN/GTSE1/THOC1/NDC80/CDC14B/ORC1/BIRC5/WDR76/CLSPN/CDC45/CDC6/MSH2/TELO2/TTI1/E2F1/FBXO31/CASP2/CDK5RAP3/CCND1/TIMELESS/TTK/CCNG1/FBXO6/MAD2L2/CDC20/PROX1/CENPF/DUSP1/ZWINT/CDK2/CDKN1A/XRCC3/STK33/CCNB1/CDCA8/CLOCK/APC/MDM2/BRIP1/DNA2/NABP2/BRCA2/PML/TICRR/NUF2/HORMAD1/DTL/INTS7/FANCD2/ATM/INCENP/CHEK1/SPC25/BUB3/EME1/BUB1B/DONSON/SPC24/TOPBP1/A…	100	0.537634
GO:0003015	BP	GO:0003015	heart process	132/6492	261/18903	4.19426e-08	6.82023e-06	5.13941e-06	FYN/EHD3/WWTR1/ATP1A2/MAP2K3/DSG2/CELF2/KCNH2/PKP2/ATP2B4/ATP2B3/MEF2A/ABCC9/RPS6KA2/SREBF1/ATP2A3/KCNN2/TBX5/JAK2/HCN2/SLC8A3/MYLK2/SNTA1/SMAD7/SGCG/PPP1R13L/DMPK/ATP1A3/SCN1B/CAV1/IL2/GLP1R/BVES/TBX18/HBEGF/PDE4D/NUP155/TNNC1/RGS2/TNNI3K/SLC8A2/TNNT2/CASQ2/ADRA1A/TBX2/KCNJ8/POPDC2/CXCR4/RAMP3/THRA/ADM2/ATP1B2/FGF13/TNNI3/KCNA5/HRC/TRPM4/TNNI2/SPX/CYP2J2/DSC2/P2RX4/HEY2/MDM2/EDNRB/BIN1/YAP1/HCN4…	132	0.505747
GO:0003002	BP	GO:0003002	regionalization	173/6492	360/18903	4.28546e-08	6.82023e-06	5.13941e-06	SEMA3F/MEOX1/MKS1/HOXC8/DMRT3/CDON/HES2/LRP6/FGF10/TP63/NLE1/GLI2/WNT8B/PAX2/PLXNA2/MEF2C/LRP2/HSPB11/SMARCD3/PALB2/TMED2/AURKA/CHRD/DLL3/TLL2/PCSK5/LRP5L/FOXF1/CLUAP1/SFRP1/MEGF8/WNT2/LFNG/MEOX2/LHX2/LHX3/BMPR1A/FGF8/DKK1/WNT3/HOXB6/KAT2A/ZBTB16/GLI1/MDFI/SRF/TBX18/CDX1/HES1/ACVR2B/OTX1/DLX2/VAX2/WLS/KMT2A/NRP2/HOXB8/HOXB5/HOXB3/GORAB/EGR2/HOXC13/HOXC11/SNAI1/PAX8/C3/FOXA2/NKX2-2/BMP2/TCF15/SIX1…	173	0.480556
GO:0036293	BP	GO:0036293	response to decreased oxygen levels	152/6492	309/18903	4.32261e-08	6.82023e-06	5.13941e-06	NOS2/CYBA/RORA/TGFBR3/TFRC/PTGS2/ENO1/KCNK2/PLOD1/MMP2/TREM2/SIRT1/PICK1/HMOX1/SLC8A3/TM9SF4/E2F1/AHCY/SUV39H1/PGK1/RGCC/EEF2K/SFRP1/CAV1/TBL2/CA9/CXCL12/SOD3/CRYAB/SOD2/SRF/CPEB4/SCAP/IL1A/NFE2L2/EPHA4/OPRD1/MPL/FOXO3/PGF/TGFB3/DNMT3A/EGR1/CAT/CXCR4/PLAU/WDR83/PTGIS/HIF3A/BMP2/GNGT1/AJUBA/CBFA2T3/KCNA5/EPO/JUND/LOXL2/VHL/ROCK2/HILPDA/MDM2/BRIP1/SLC2A8/MYC/CPEB2/TLR2/MGARP/THBS1/ACVRL1/BNIP2/PML/…	152	0.491909
GO:0008406	BP	GO:0008406	gonad development	120/6492	233/18903	4.65787e-08	7.17423e-06	5.40616e-06	SOX8/CSDE1/ARID4A/HSPA5/KITLG/PTPRN/ASPM/LRP2/PGR/ATRX/BAX/MMP2/TFAP2C/ESR1/MSH2/SIRT1/SIX4/GATA1/FGF9/SALL1/ACSBG1/SFRP1/LHB/AMH/TFPT/LFNG/CASP2/NUDT1/GATA3/FGF8/CCND1/NUP107/IL1A/TCF21/FOXO3/KIF18A/INHBA/PRDX4/TNFAIP6/INHA/MEA1/EREG/SOX9/EIF2S2/KDR/VGF/BCL2L2/MAS1/TAF4/RARA/NASP/WNT2B/PDGFRA/CGA/AMHR2/NKX2-1/BRIP1/NR5A1/RNF38/DMRT1/LHCGR/CYP1B1/BMPR1B/DHH/BRCA2/ADAM21/SCAPER/GATA6/SMAD4/LHX9/AD…	120	0.515021
GO:0042060	BP	GO:0042060	wound healing	206/6492	442/18903	4.84428e-08	7.2526e-06	5.46522e-06	ENPP4/TFPI/ABCC8/CX3CL1/SYT7/PLAUR/IGF1/SLC11A1/VCL/ENTPD2/DGKG/CDH3/TSPAN32/ERBB3/MYLK/RAB27A/FGF10/SCARB1/FERMT2/CLASP1/ACTB/MCAM/FBLN1/FAP/CPB2/GP6/APOH/TYRO3/EPB41L4B/JAK2/HMOX1/PDGFB/CTSG/ITPK1/HNF4A/FERMT1/MYL9/GATA1/CD40LG/WFDC1/COMP/CAV1/KANK1/ACTA2/P2RX1/PF4V1/HGFAC/VWF/PTPN6/SMOC2/PTK7/SRF/HBEGF/KNG1/HRG/PDCD10/IL1A/ITGB6/CHMP3/PROC/NFE2L2/PLA2G4A/MPL/F3/SERPINC1/TNFAIP3/PPL/TGFB3/CXCR4…	206	0.466063
GO:0007565	BP	GO:0007565	female pregnancy	101/6492	189/18903	4.93298e-08	7.2526e-06	5.46522e-06	FKBP4/ITGA3/ABCC8/TEAD3/PRDM1/SPHK2/EPN1/DAZAP1/PTGS2/FBLN1/PGR/EPYC/COL16A1/TMED2/MMP2/PTHLH/ESR1/PCSK5/MMP9/TLE6/SYDE1/KLF1/AMBP/RLN2/RLN1/CYP27B1/SLC38A1/UMPS/IGFBP2/IGFBP5/ASH1L/RGS2/SPP1/PGF/TGFB3/PRLHR/ADCY7/RECK/POLR1B/FOSB/APOL2/LIF/PARP2/EPO/TRIM28/IDO1/RARA/ITGB4/MEN1/SLC38A2/DSG1/ADCYAP1/CORIN/CRHBP/PAM/CRH/A1CF/ADRA2A/DEDD/STC1/GIP/TPPP3/AGRP/CBS/UBE2Q1/ITGA5/IGFBP7/IHH/TGFBR2/TCF23/U…	101	0.534392
GO:0006816	BP	GO:0006816	calcium ion transport	205/6492	440/18903	5.38449e-08	7.74051e-06	5.83288e-06	CALCR/CX3CL1/PKD1/FYN/EHD3/ATP2C1/ATP1A2/BAK1/MCUR1/HOMER3/CYBA/MCOLN3/SEC61A1/CAMK2B/ATP2B4/SPHK2/ATP2C2/MYLK/CACNB1/ATP2B3/GNB5/CAMK2A/PTGS2/ATP2A3/CACNG4/ADCYAP1R1/TRPM3/BAX/REM1/FKBP1A/P2RX7/SLC8B1/JPH4/ITPR3/ABL1/PDGFB/CACNA1I/SLC8A3/BDKRB1/TRPC4AP/EPPIN/CACNA1F/NALCN/HTR2A/CEMIP/TRPA1/GRIN2D/CAV1/NCS1/CXCL12/PKD2L1/PPP3CB/P2RX1/CCL2/CACNG1/RCVRN/WFS1/CYP27B1/PTPN6/PDE4D/HES1/GRIN3B/OPRD1/SL…	205	0.465909
GO:0021537	BP	GO:0021537	telencephalon development	129/6492	255/18903	5.82973e-08	8.19838e-06	6.17792e-06	KDM1A/ARX/PAFAH1B1/TACC3/ATP1A2/UBA6/PHLPP2/RTN4R/ATP2B4/CDON/ASPM/SEMA3A/WDR62/RARB/BAX/LHX5/EFNA2/SALL1/NUMBL/ATP1A3/DLX5/OGDH/EZH2/LHX2/LHX6/CXCL12/FGF8/KAT2A/EZH1/MDK/KCNA1/PHACTR1/NR2E1/SRF/HES1/FOXP1/ID2/DLX2/PROX1/KIF14/CXCR4/INHBA/BBS2/MBOAT7/BMP2/AVPR2/FOXP2/FEZF1/ATP1B2/FGF13/NSUN5/MAS1/ZSWIM6/PLXNA3/RARA/BCAN/EPHB2/SLC38A2/EMX1/NKX2-1/TBR1/DAB2IP/ATAT1/MGARP/SIX3/TACC2/DMRTA2/DLX1/TMEM…	129	0.505882
GO:0070588	BP	GO:0070588	calcium ion transmembrane transport	166/6492	345/18903	7.18247e-08	9.82828e-06	7.40613e-06	CALCR/CX3CL1/PKD1/FYN/EHD3/ATP2C1/ATP1A2/BAK1/MCUR1/CYBA/MCOLN3/SEC61A1/ATP2B4/ATP2C2/CACNB1/ATP2B3/GNB5/ATP2A3/CACNG4/ADCYAP1R1/TRPM3/BAX/REM1/FKBP1A/P2RX7/SLC8B1/JPH4/ITPR3/ABL1/CACNA1I/SLC8A3/BDKRB1/TRPC4AP/CACNA1F/NALCN/HTR2A/CEMIP/TRPA1/GRIN2D/CAV1/NCS1/PKD2L1/PPP3CB/P2RX1/CACNG1/PTPN6/PDE4D/GRIN3B/SLC8A2/CASQ2/PKD2/TRPM6/ADRA1A/PPP3CC/RAMP3/PLP1/AHNAK/OPRL1/SLC25A23/HSPA2/TRPV5/EPO/HRC/TRPM…	166	0.481159
GO:0045839	BP	GO:0045839	negative regulation of mitotic nuclear division	39/6492	56/18903	7.41111e-08	9.82828e-06	7.40613e-06	MAD1L1/SPDL1/TRIP13/NDC80/BIRC5/FBXO5/TTK/MAD2L2/CDC20/CENPF/DUSP1/ZWINT/XRCC3/CCNB1/CDCA8/APC/TOM1L1/NUF2/ATM/INCENP/CHEK1/SPC25/BUB3/BUB1B/SPC24/MAD2L1/PRAP1/PLK1/CDT1/BUB1/NME6/MTBP/ZWILCH/TOM1L2/AURKAIP1/GEN1/AURKB/KNTC1/LCMT1	39	0.696429
GO:0048568	BP	GO:0048568	embryonic organ development	208/6492	449/18903	7.44452e-08	9.82828e-06	7.40613e-06	WNT16/DLX6/TEAD3/PKD1/MKS1/CC2D2A/KITLG/PRDM1/COL11A1/EPN1/NTN1/FGF10/GLI2/PAX2/RARB/ITGA8/MEF2C/PALB2/GRHL2/NCOA1/TMED2/MYO15A/TBX15/MYO3A/PCSK5/CCDC134/PDGFB/SIX4/ASB2/GATA1/FGF9/FOXF1/CLUAP1/SALL1/EYA1/PPP1R13L/MEGF8/HPN/DLX5/WNT2/GATA3/BMPR1A/FGF8/HOXB6/NKX3-2/FOLR1/GLI1/BMP5/SOBP/MDFI/TFEB/PTK7/SRF/TBX18/HAND1/HES1/HYAL1/EFEMP1/OTX1/TPO/ID2/DLX2/VAX2/ATP6V1B1/KCNQ4/MFAP2/PROX1/KMT2A/TCF21/PK…	208	0.463252
GO:0050878	BP	GO:0050878	regulation of body fluid levels	184/6492	390/18903	8.56997e-08	1.10878e-05	8.35527e-06	ENPP4/TFPI/TFAP2B/PLAUR/AKAP11/VCL/CYBA/ENTPD2/DGKG/WNK1/TSPAN32/RAB27A/FGF10/TP63/ACTB/FBLN1/FAP/CPB2/AKR1B1/GP6/APOH/TYRO3/JAK2/PDGFB/CTSG/ITPK1/HNF4A/MYL9/GATA1/CD40LG/FA2H/CORO2B/COMP/LSR/CAV1/MET/GHRHR/NEURL1/P2RX1/PF4V1/WFS1/HGFAC/CCND1/VWF/OAS2/PTPN6/SRF/NPR3/KNG1/HRG/UMPS/TACR1/PROC/ATP6V1B1/NFE2L2/PLA2G4A/MPL/F3/SERPINC1/STMN1/VAMP8/SOCS2/PLAU/F13A1/OPRL1/FOXA2/F10/PROZ/STAT5A/WNK4/AVPR2…	184	0.471795
GO:0072006	BP	GO:0072006	nephron development	84/6492	152/18903	9.2656e-08	1.17528e-05	8.85634e-06	SOX8/ITGA3/TFAP2B/PKD1/WWTR1/SEC61A1/NOTCH3/ACAT1/PAX2/COL4A4/MEF2C/PDGFB/SIX4/SALL1/EYA1/CALB1/GATA3/ACTA2/FGF8/NUP107/HES1/STAT1/WNT6/NID1/TCF21/PKD2/TEK/EGR1/SOX9/NUP85/PAX8/BMP2/WNK4/SIX1/LIF/FOXJ1/WNT2B/NOTCH2/PDGFRA/EDNRB/MYC/SULF1/YAP1/FGF2/IQGAP1/GREB1L/SMAD4/OSR1/ADAMTS16/KIRREL3/EDNRA/HS3ST3A1/ANGPT1/IL6R/KIF26B/KLF15/SHH/ILK/DCHS1/SERPINB7/GREM1/GDNF/MTSS1/PDGFD/BCL2/LAMB2/CD34/AQP11/C…	84	0.552632
GO:0060047	BP	GO:0060047	heart contraction	126/6492	250/18903	1.08465e-07	1.34935e-05	1.01681e-05	EHD3/ATP1A2/MAP2K3/DSG2/CELF2/KCNH2/PKP2/ATP2B4/ATP2B3/MEF2A/ABCC9/RPS6KA2/SREBF1/ATP2A3/KCNN2/TBX5/JAK2/HCN2/SLC8A3/MYLK2/SNTA1/SMAD7/SGCG/PPP1R13L/DMPK/ATP1A3/SCN1B/CAV1/IL2/GLP1R/BVES/TBX18/HBEGF/PDE4D/NUP155/TNNC1/RGS2/TNNI3K/SLC8A2/TNNT2/CASQ2/ADRA1A/TBX2/KCNJ8/POPDC2/CXCR4/THRA/ADM2/ATP1B2/FGF13/TNNI3/KCNA5/HRC/TRPM4/TNNI2/SPX/CYP2J2/DSC2/P2RX4/HEY2/MDM2/EDNRB/BIN1/HCN4/PDE5A/FOXN4/TPM1/GAT…	126	0.504
GO:0001763	BP	GO:0001763	morphogenesis of a branching structure	106/6492	203/18903	1.12411e-07	1.37205e-05	1.03391e-05	SOX8/PKD1/MKS1/HGF/PRDM1/TIE1/FGF10/TP63/GLI2/PAX2/SIRT6/PGR/GRHL2/TMED2/ESR1/ABL1/LRP5L/SIX4/NFATC4/CTSZ/LAMA1/ESRP2/FOXF1/SALL1/EYA1/SFRP1/MET/WNT2/HOXA13/FGF8/AREG/MDK/TIMELESS/SRF/PLXNA1/WNT6/DLX2/PROX1/TCF21/PKD2/TBX2/SOX9/PAX8/BMP2/SIX1/KDR/FGF13/WNT2B/EPHA7/SPRY2/NKX2-1/MYC/GCM1/SULF1/YAP1/FGF2/FGF7/PML/GREB1L/SMAD4/RERE/EPHA2/SLIT2/SFRP2/ADAMTS16/RSPO3/RSPO2/ST14/EDNRA/HS3ST3A1/MMP14/FZD5…	106	0.522167
GO:0060485	BP	GO:0060485	mesenchyme development	152/6492	313/18903	1.21993e-07	1.46143e-05	1.10127e-05	SEMA3F/WNT16/MEOX1/SOX8/SEMA3G/IGF1/WWTR1/PHLDB1/HGF/ZFP64/CUL7/EPHA3/KITLG/ERBB3/ROCK1/TGFBR3/LRP6/FGF10/TCOF1/FERMT2/CLASP1/SEMA3A/PAX2/FGFR1/MEF2C/TBX5/DLL3/SEMA4G/SIX4/FAM83D/SMAD7/FGF9/RGCC/FOXF1/SFRP1/AMH/HPN/WNT2/EZH2/AKNA/GATA3/BMPR1A/ACTA2/FGF8/FOLR1/MDK/CORO1C/BMP5/RBM24/PTK7/HAND1/FAM172A/HES1/STAT1/EPHA4/MAD2L2/NRP2/TCF21/PKD2/TGFB3/TBX2/GLIPR2/SNAI1/SOX9/POLR1B/FOXA2/BMP2/TCF15/SIX1/…	152	0.485623
GO:1901988	BP	GO:1901988	negative regulation of cell cycle phase transition	135/6492	272/18903	1.24483e-07	1.46414e-05	1.10331e-05	MAD1L1/CRY1/BRCA1/FHL1/NSUN2/SPDL1/RAD51/FOXN3/TRIP13/TIPIN/GTSE1/JADE1/THOC1/RBL1/NDC80/CDC14B/ORC1/BIRC5/WDR76/CLSPN/CDC45/CDC6/MSH2/SUSD2/TELO2/TTI1/E2F1/RGCC/FBXO31/RBL2/CASP2/EZH2/CDK5RAP3/CCL2/CCND1/TIMELESS/FBXO5/TTK/CCNG1/FBXO6/MAD2L2/MIIP/CDC20/PROX1/CENPF/PKD2/DUSP1/INHBA/ZWINT/CDK2/CDKN1A/XRCC3/STK33/MEN1/CCNB1/CDCA8/CLOCK/APC/MDM2/BRIP1/KLF4/DNA2/NABP2/BRCA2/PML/TICRR/NUF2/HORMAD1/DTL…	135	0.496324
GO:0046545	BP	GO:0046545	development of primary female sexual characteristics	64/6492	109/18903	1.60127e-07	1.84975e-05	1.39388e-05	HSPA5/KITLG/PTPRN/ADCYAP1R1/PGR/BAX/MMP2/ESR1/SIRT1/ACSBG1/SFRP1/AMH/LFNG/CASP2/NUP107/FOXO3/INHBA/TNFAIP6/INHA/EREG/KDR/VGF/TAF4/PDGFRA/CGA/AMHR2/NR5A1/LHCGR/BMPR1B/BRCA2/SCAPER/SMAD4/LHX9/SLIT2/GNRH1/ATM/ARID5B/ADAMTS1/MMP14/KIT/INHBB/TIPARP/PTX3/NOS3/SGPL1/ZFPM2/FSHR/BCL2L1/BCL2/STAT5B/FZD4/GPR149/A2M/UMODL1/ZFP42/FOXL2/SLIT3/WT1/FANCA/ZP3/SRC/ANG/FANCG/DACH1	64	0.587156
GO:0061351	BP	GO:0061351	neural precursor cell proliferation	82/6492	149/18903	1.66935e-07	1.88478e-05	1.42028e-05	KDM1A/ARX/CX3CL1/PAFAH1B1/TEAD3/CDON/ASPM/EML1/RORA/LIMS2/WDR62/PCM1/DCT/LRP2/SMARCD3/LHX5/RPGRIP1/NUMBL/WNT2/LHX2/AKNA/FGF8/PITX3/IFT20/MDK/GLI1/KCNA1/NR2E1/ID2/ARTN/PTBP2/PROX1/KIF14/FOXO3/FGF13/NES/SOX5/EMX1/SIX3/FGF2/SLC39A5/TARBP2/RERE/DMRTA2/SLC16A2/VAX1/ITGB1/DIXDC1/FOXO1/WNT7A/EPHB1/IGF2BP1/BTG2/RACGAP1/HHIP/DAGLB/SHH/FZD6/MELK/SPINT1/ILK/SPINT2/HOOK3/CX3CR1/GBX2/CEP120/ATF5/SHCBP1/OTP/ID…	82	0.550336
GO:0050804	BP	GO:0050804	modulation of chemical synaptic transmission	206/6492	448/18903	1.71069e-07	1.88478e-05	1.42028e-05	PRKAR2B/CX3CL1/MAPK8IP2/FYN/SYT7/ATP1A2/APBA2/CYP46A1/CDH1/HOMER3/RASGRF1/CAMK2B/PRKCZ/PFN2/CAMK2A/PTGS2/TACR2/CACNG4/SLC1A3/OPHN1/RIMS1/SCTR/MEF2C/ERC1/JPH4/ITPR3/JAK2/ABL1/PICK1/SLC8A3/NFATC4/CELF4/CHRDL1/NALCN/HTR2A/CBLN1/ZDHHC2/CA2/CALB1/DMPK/GRIN2D/GRIK5/STX1A/APBA1/PPP3CB/CPEB3/NEURL1/DKK1/LGI1/GIT1/P2RX1/CCL2/KAT2A/MPP2/SLC38A1/NR2E1/SRF/BCHE/CSPG5/TACR1/RAB3GAP1/PLCL1/EPHA4/RAP1A/DLGAP3/K…	206	0.459821
GO:0007409	BP	GO:0007409	axonogenesis	202/6492	438/18903	1.719e-07	1.88478e-05	1.42028e-05	SEMA3F/ARX/MYCBP2/PAFAH1B1/SEMA3G/FYN/LYPLA2/CNTN1/VCL/CDH1/RTN4R/EPHA3/LAMA3/LAMC2/NTN1/CTNNA2/NEO1/EPHA8/GLI2/NOTCH3/SEMA3A/ACTB/PAX2/PLXNA2/OPHN1/EPHA6/RAB21/ULK2/IGSF9/NRCAM/DPYSL2/SEMA4G/ABL1/EFNA2/RPS6KA5/LAMA1/NUMBL/PTPRS/MEGF8/MAG/SCN1B/DLX5/LIMK1/LHX2/LHX3/GATA3/CXCL12/UNC5B/PPP3CB/LGI1/WNT3/CNTNAP1/RND2/UST/NR2E1/SRF/PLXNA1/VAX2/EPHA4/ARTN/STMN1/NRP2/KLF7/SPP1/TNN/MYOT/LHX4/SLITRK3/EGR2…	202	0.461187
GO:0008585	BP	GO:0008585	female gonad development	62/6492	105/18903	1.87555e-07	1.99335e-05	1.5021e-05	HSPA5/KITLG/PTPRN/PGR/BAX/MMP2/ESR1/SIRT1/ACSBG1/SFRP1/AMH/LFNG/CASP2/NUP107/FOXO3/INHBA/TNFAIP6/INHA/EREG/KDR/VGF/TAF4/PDGFRA/CGA/AMHR2/NR5A1/LHCGR/BMPR1B/BRCA2/SCAPER/SMAD4/LHX9/SLIT2/GNRH1/ATM/ARID5B/ADAMTS1/MMP14/KIT/INHBB/TIPARP/PTX3/NOS3/SGPL1/ZFPM2/FSHR/BCL2L1/BCL2/STAT5B/FZD4/GPR149/A2M/UMODL1/ZFP42/FOXL2/SLIT3/WT1/FANCA/ZP3/SRC/ANG/FANCG	62	0.590476
GO:0048732	BP	GO:0048732	gland development	203/6492	441/18903	1.90375e-07	1.99335e-05	1.5021e-05	MAD1L1/FKBP4/JARID2/PKD1/HGF/CUL3/OTC/CDH1/DKK3/ATP2C2/NTN1/PITX1/TGFBR3/FGF10/POLB/LIMS2/TP63/GLI2/ACAT1/RAP1GAP/CPB2/PGR/BAX/MMP2/AURKA/ESR1/JAK2/ABL1/SMARCB1/LRP5L/RHBDD3/HMOX1/ACO2/SIX4/SRSF5/ARHGAP5/PCK2/HNF4A/LAMA1/ESRP2/FA2H/FOXF1/SALL1/SFRP1/FGL1/LSR/HPN/CAV1/MET/WNT2/HOXA13/GHRHR/EZH2/LHX3/GATA3/BMPR1A/FGF8/NEURL1/WNT3/CDK5RAP3/NFKB1/AREG/CCND1/MDK/GLI1/OAS2/SOD2/SRF/NR3C1/HES1/UMPS/PLXN…	203	0.460317
GO:0042391	BP	GO:0042391	regulation of membrane potential	199/6492	431/18903	1.91046e-07	1.99335e-05	1.5021e-05	ABCB5/MAPK8IP2/DCN/GABRA3/EHD3/BID/ATP1A2/FHL1/NDUFS1/GCLM/BAK1/MYOC/BEST2/DSG2/KCNH2/PKP2/PRKCZ/CNGB1/ACTN2/RIMS1/KCNN2/MEF2C/KCNK2/BAX/SLC4A11/P2RX7/SLC8B1/TBX5/KCNH4/NRCAM/SLC26A3/PPP2R3C/TREM2/ABL1/KCNK6/HCN2/CACNA1I/SLC8A3/TCL1A/SNTA1/CELF4/SMAD7/GABRE/NALCN/CBLN1/DMPK/SLC1A6/ATP1A3/GRIN2D/SCN1B/GRIK5/CAV1/STX1A/P2RX1/CNTNAP1/MPP2/GABRA4/KCNA1/SOD2/BVES/TBX18/GABRG2/NUP155/TACR1/RAB3GAP1/OPR…	199	0.461717
GO:0099177	BP	GO:0099177	regulation of trans-synaptic signaling	206/6492	449/18903	2.09699e-07	2.15324e-05	1.62258e-05	PRKAR2B/CX3CL1/MAPK8IP2/FYN/SYT7/ATP1A2/APBA2/CYP46A1/CDH1/HOMER3/RASGRF1/CAMK2B/PRKCZ/PFN2/CAMK2A/PTGS2/TACR2/CACNG4/SLC1A3/OPHN1/RIMS1/SCTR/MEF2C/ERC1/JPH4/ITPR3/JAK2/ABL1/PICK1/SLC8A3/NFATC4/CELF4/CHRDL1/NALCN/HTR2A/CBLN1/ZDHHC2/CA2/CALB1/DMPK/GRIN2D/GRIK5/STX1A/APBA1/PPP3CB/CPEB3/NEURL1/DKK1/LGI1/GIT1/P2RX1/CCL2/KAT2A/MPP2/SLC38A1/NR2E1/SRF/BCHE/CSPG5/TACR1/RAB3GAP1/PLCL1/EPHA4/RAP1A/DLGAP3/K…	206	0.458797
GO:0045787	BP	GO:0045787	positive regulation of cell cycle	171/6492	362/18903	2.18742e-07	2.211e-05	1.66611e-05	MAD1L1/KMT2E/DBF4/PAFAH1B1/PKD1/DDX11/IGF1/CUL3/USP2/LRP6/FGF10/ASNS/SPAG5/THOC1/NDC80/CDC14B/ATRX/AURKA/BIRC5/TGM1/CDC6/ABL1/CDC7/RANBP1/PDGFB/CDC25B/FAM83D/RGCC/AURKC/LFNG/HOXA13/EZH2/FGF8/DUSP3/NCAPG/CCND1/GLI1/RAD51AP1/FBXO5/NR2E1/SMOC2/SMC4/KAT2B/HES1/ECT2/HYAL1/IL1A/CHMP3/PROX1/KIF14/PKD2/CCND2/CPSF3/TBX2/NCAPH/GPSM2/CIT/GIPC1/STIL/CKS2/EREG/XRCC3/DLGAP5/HSPA2/PRDM7/E2F8/KCNA5/RARA/CCNB1/ME…	171	0.472376
GO:0097553	BP	GO:0097553	calcium ion transmembrane import into cytosol	96/6492	182/18903	2.36242e-07	2.35115e-05	1.77172e-05	CALCR/CX3CL1/FYN/ATP1A2/BAK1/CYBA/MCOLN3/ATP2B4/ADCYAP1R1/BAX/FKBP1A/P2RX7/SLC8B1/JPH4/ITPR3/ABL1/SLC8A3/BDKRB1/CACNA1F/HTR2A/CEMIP/TRPA1/GRIN2D/CAV1/PPP3CB/P2RX1/PTPN6/PDE4D/SLC8A2/CASQ2/PKD2/ADRA1A/PPP3CC/RAMP3/TRPV5/EPO/HRC/P2RX4/HTR2B/LHCGR/FGF2/TRPC3/CXCL9/METTL21C/SLC24A4/PML/CACNA1A/TRPM2/XCL1/TRPC1/SNCA/CAMK2D/ANK2/HTR2C/CACNA1B/JPH2/ITPR1/CACNA1C/AKAP6/CACNA2D1/JPH3/UBASH3B/SLC24A2/CLIC2…	96	0.527473
GO:0006261	BP	GO:0006261	DNA-templated DNA replication	89/6492	166/18903	2.47855e-07	2.42935e-05	1.83065e-05	DBF4/REV3L/BRCA1/DDX11/POLA2/PNKP/RFC2/RAD51/POLQ/POLD1/WDR18/MCM10/POLB/MCM2/TIPIN/MCM6/THOC1/ATRX/ORC1/ORC6/CDC45/CDC6/CDC7/CDC34/MCM5/POLE2/GINS1/SAMHD1/MCM4/CCNE1/LIG1/POLD2/RECQL5/RFC5/TIMELESS/FBXO5/MCM3/GMNN/BCL6/CDK2/WRNIP1/MGME1/MCM8/CHTF18/E2F8/GINS2/PCNA/RFC3/DSCC1/HMGA1/ZNF365/DNA2/ZGRF1/BRCA2/TICRR/PRIM2/MMS22L/GINS4/EME1/DONSON/TONSL/RECQL4/LRWD1/DBF4B/TOPBP1/RFC4/E2F7/MCM7/FAM111A/…	89	0.536145
GO:0003018	BP	GO:0003018	vascular process in circulatory system	133/6492	270/18903	2.66464e-07	2.57277e-05	1.93872e-05	ABCC8/SLC6A13/PIK3C2A/SLC38A5/ATP1A2/GCLM/ATP2B4/SLC2A3/ROCK1/ABCC9/TFRC/FERMT2/PTGS2/ATP2A3/TACR2/SLC1A3/LRP2/ABCB1/MMP2/ABL1/SLC5A1/SNTA1/HTR2A/TJP1/SLC5A5/COMP/CAV1/PLOD3/ACTA2/P2RX1/SOD3/SLC38A1/SOD2/NPR3/KNG1/TACR1/SLC1A4/LEPR/RGS2/FAAH/SLC8A2/SLC16A7/TEK/ADRA1A/KCNJ8/LRP1/BBS2/ABCC4/AVPR2/KLF2/ATP1B2/KCNA5/TRPM4/AKAP12/SLC6A6/RAMP2/PER2/CRP/CHRM3/NTS/SLC38A2/ROCK2/MTNR1B/HTR1B/HTR2B/EDNRB/S…	133	0.492593
GO:0042698	BP	GO:0042698	ovulation cycle	46/6492	72/18903	2.88804e-07	2.74746e-05	2.07036e-05	HSPA5/PTPRN/PGR/MMP2/ESR1/TYRO3/SIRT1/AMH/CASP2/MDK/FOXO3/TGFB3/EGR1/INHBA/TNFAIP6/EREG/OPRL1/SERPINF1/PCNA/PDGFRA/CGA/NR5A1/LHCGR/CYP1B1/BMPR1B/SCAPER/TRPM2/SLIT2/PAM/ADAMTS1/PTX3/NOS3/SGPL1/AXL/KISS1/FSHR/STAT5B/FZD4/GPR149/A2M/NHLH2/OXTR/SLIT3/ZP3/SRC/GDF10	46	0.638889
GO:0009612	BP	GO:0009612	response to mechanical stimulus	108/6492	211/18903	3.20216e-07	3.00214e-05	2.26227e-05	MAP3K14/PKD1/FYN/ATP1A2/BAK1/CYBA/COL11A1/PTGS2/SLC1A3/KCNK2/MMP2/P2RX7/MAP3K1/BDKRB1/NFKBIA/ABHD12/HTR2A/TRPA1/MAG/HPN/CASP2/CXCL12/PKD2L1/NFKB1/NRXN2/MDK/KCNA1/LTBR/TACR1/STAT1/IGFBP2/GADD45A/PKD2/PPL/LRP11/CXCR4/SOX9/FOSB/KCNA5/JUND/HABP4/MAP1B/CHI3L1/MEIS2/SLC38A2/ANO3/TLR4/IL33/KIAA0319/CASP5/THBS1/STRA6/FGF2/BCL10/ACTA1/USP53/PSPH/GSN/ANKRD1/TMC2/CHEK1/BAG3/PIEZO2/MMP14/KIT/PKD1L1/F11R/BTG2…	108	0.511848
GO:0061138	BP	GO:0061138	morphogenesis of a branching epithelium	98/6492	188/18903	3.69703e-07	3.36846e-05	2.53832e-05	SOX8/PKD1/MKS1/HGF/TIE1/FGF10/TP63/GLI2/PAX2/SIRT6/PGR/GRHL2/TMED2/ESR1/ABL1/LRP5L/SIX4/NFATC4/CTSZ/LAMA1/ESRP2/FOXF1/SALL1/EYA1/SFRP1/MET/WNT2/HOXA13/FGF8/AREG/MDK/TIMELESS/SRF/PLXNA1/WNT6/PROX1/TCF21/PKD2/TBX2/SOX9/PAX8/BMP2/SIX1/KDR/WNT2B/SPRY2/NKX2-1/MYC/GCM1/SULF1/YAP1/FGF2/FGF7/PML/GREB1L/SMAD4/EPHA2/SLIT2/SFRP2/ADAMTS16/RSPO3/RSPO2/ST14/EDNRA/HS3ST3A1/MMP14/FZD5/IHH/TGFBR2/SPRY1/HHIP/TBX20…	98	0.521277
GO:1903169	BP	GO:1903169	regulation of calcium ion transmembrane transport	98/6492	188/18903	3.69703e-07	3.36846e-05	2.53832e-05	CALCR/CX3CL1/FYN/EHD3/ATP1A2/BAK1/CYBA/CACNB1/GNB5/ADCYAP1R1/BAX/REM1/FKBP1A/P2RX7/JPH4/ABL1/BDKRB1/CEMIP/CAV1/PPP3CB/P2RX1/CACNG1/PTPN6/PDE4D/CASQ2/PKD2/PPP3CC/RAMP3/PLP1/AHNAK/OPRL1/HSPA2/EPO/HRC/RGN/P2RX4/BIN1/LHCGR/TRPC3/CXCL9/METTL21C/PML/XCL1/UBR3/STAC/TRPC1/SNCA/CAMK2D/ANK2/TMC2/JPH2/ADRA2A/CACNA1C/AKAP6/CACNA2D1/JPH3/UBASH3B/CLIC2/CABP1/G6PD/C4orf3/GPER1/CDK5/GEM/CACNB2/STIM1/JSRP1/CACNB3…	98	0.521277
GO:0061564	BP	GO:0061564	axon development	221/6492	490/18903	3.88063e-07	3.44397e-05	2.59522e-05	SEMA3F/ARX/MYCBP2/PAFAH1B1/SEMA3G/FYN/LYPLA2/CNTN1/VCL/CDH1/RTN4R/EPHA3/LAMA3/LAMC2/NTN1/CTNNA2/NEO1/EPHA8/GLI2/NOTCH3/SCARF1/SEMA3A/ACTB/PAX2/PLXNA2/OPHN1/EPHA6/RAB21/ULK2/IGSF9/MMP2/NRCAM/DPYSL2/SEMA4G/JAK2/ABL1/EFNA2/RPS6KA5/LAMA1/NUMBL/PTPRS/MEGF8/MAG/SCN1B/DLX5/LIMK1/LHX2/LHX3/GATA3/CXCL12/UNC5B/PPP3CB/LGI1/WNT3/CNTNAP1/RND2/FOLR1/UST/NR2E1/SRF/PLXNA1/CSPG5/VAX2/EPHA4/MTR/ARTN/STMN1/NRP2/KLF…	221	0.45102
GO:0008016	BP	GO:0008016	regulation of heart contraction	109/6492	214/18903	3.88638e-07	3.44397e-05	2.59522e-05	EHD3/ATP1A2/DSG2/CELF2/KCNH2/PKP2/ATP2B4/ATP2B3/MEF2A/ABCC9/SREBF1/ATP2A3/KCNN2/TBX5/JAK2/HCN2/SLC8A3/SNTA1/SMAD7/DMPK/ATP1A3/SCN1B/CAV1/IL2/GLP1R/BVES/TBX18/HBEGF/PDE4D/NUP155/RGS2/TNNI3K/SLC8A2/TNNT2/CASQ2/ADRA1A/TBX2/POPDC2/THRA/ADM2/ATP1B2/FGF13/TNNI3/KCNA5/HRC/TRPM4/SPX/CYP2J2/DSC2/P2RX4/HEY2/MDM2/EDNRB/BIN1/HCN4/PDE5A/FOXN4/TPM1/HCN3/TRPC1/CORIN/CAMK2D/ANK2/SCN2B/CACNA1C/EDNRA/KCNE4/GPD1L/C…	109	0.509346
GO:0008584	BP	GO:0008584	male gonad development	80/6492	147/18903	4.37636e-07	3.82576e-05	2.88292e-05	SOX8/CSDE1/ARID4A/KITLG/ASPM/LRP2/ATRX/BAX/TFAP2C/ESR1/MSH2/SIX4/GATA1/FGF9/SFRP1/LHB/AMH/TFPT/NUDT1/GATA3/CCND1/IL1A/TCF21/KIF18A/INHBA/PRDX4/INHA/MEA1/SOX9/EIF2S2/BCL2L2/MAS1/RARA/NASP/WNT2B/PDGFRA/AMHR2/NKX2-1/BRIP1/NR5A1/RNF38/DMRT1/LHCGR/CYP1B1/DHH/ADAM21/SCAPER/GATA6/SMAD4/LHX9/ADAM15/SFRP2/SRD5A1/ARID5B/DHX37/FER/GFRA1/BCL2L11/MMP14/KIT/KLHL10/INHBB/HMGB2/TLR3/CITED2/SGPL1/AR/ZFPM2/FSHR/BC…	80	0.544218
GO:0051924	BP	GO:0051924	regulation of calcium ion transport	131/6492	268/18903	5.61952e-07	4.84703e-05	3.65249e-05	CALCR/CX3CL1/FYN/EHD3/ATP1A2/BAK1/HOMER3/CYBA/CAMK2B/SPHK2/ATP2C2/MYLK/CACNB1/GNB5/CAMK2A/PTGS2/ADCYAP1R1/BAX/REM1/FKBP1A/P2RX7/SLC8B1/JPH4/ABL1/PDGFB/BDKRB1/EPPIN/CEMIP/CAV1/CXCL12/PPP3CB/P2RX1/CCL2/CACNG1/RCVRN/WFS1/PTPN6/PDE4D/HES1/GRIN3B/OPRD1/CASQ2/PKD2/PPP3CC/CXCR4/RAMP3/PLP1/SEMG1/AHNAK/OPRL1/HSPA2/MCHR1/EPO/HRC/RGN/SARAF/P2RX4/BIN1/TRPC6/LHCGR/TRPC3/CXCL9/METTL21C/PML/XCL1/UBR3/STAC/TRPC1…	131	0.488806
GO:0007093	BP	GO:0007093	mitotic cell cycle checkpoint signaling	77/6492	141/18903	5.94524e-07	5.06049e-05	3.81335e-05	MAD1L1/BRCA1/SPDL1/FOXN3/TRIP13/TIPIN/GTSE1/NDC80/CDC14B/ORC1/BIRC5/CLSPN/CDC6/MSH2/FBXO31/CASP2/CDK5RAP3/CCND1/TTK/CCNG1/MAD2L2/CDC20/CENPF/DUSP1/ZWINT/CDK2/CDKN1A/XRCC3/STK33/CCNB1/CDCA8/APC/MDM2/NABP2/PML/TICRR/NUF2/DTL/FANCD2/ATM/INCENP/CHEK1/SPC25/BUB3/EME1/BUB1B/DONSON/SPC24/TOPBP1/MAD2L1/CHMP4C/PRAP1/ZFYVE19/PLK1/CDT1/PBK/RFWD3/CRADD/BUB1/CDK1/TRIAP1/RAD9A/PLK3/ZWILCH/PIDD1/GEN1/AURKB/CHEK…	77	0.546099
GO:0090329	BP	GO:0090329	regulation of DNA-templated DNA replication	38/6492	57/18903	6.33488e-07	5.25529e-05	3.96015e-05	DBF4/RFC2/MCM2/TIPIN/MCM6/ATRX/CDC7/MCM5/GINS1/MCM4/RFC5/TIMELESS/FBXO5/MCM3/GMNN/BCL6/CDK2/WRNIP1/CHTF18/E2F8/GINS2/PCNA/RFC3/DSCC1/BRCA2/TICRR/GINS4/DONSON/DBF4B/RFC4/E2F7/MCM7/CDT1/GINS3/BLM/MCIDAS/POLG2/DACH1	38	0.666667
GO:0046546	BP	GO:0046546	development of primary male sexual characteristics	80/6492	148/18903	6.33657e-07	5.25529e-05	3.96015e-05	SOX8/CSDE1/ARID4A/KITLG/ASPM/LRP2/ATRX/BAX/TFAP2C/ESR1/MSH2/SIX4/GATA1/FGF9/SFRP1/LHB/AMH/TFPT/NUDT1/GATA3/CCND1/IL1A/TCF21/KIF18A/INHBA/PRDX4/INHA/MEA1/SOX9/EIF2S2/BCL2L2/MAS1/RARA/NASP/WNT2B/PDGFRA/AMHR2/NKX2-1/BRIP1/NR5A1/RNF38/DMRT1/LHCGR/CYP1B1/DHH/ADAM21/SCAPER/GATA6/SMAD4/LHX9/ADAM15/SFRP2/SRD5A1/ARID5B/DHX37/FER/GFRA1/BCL2L11/MMP14/KIT/KLHL10/INHBB/HMGB2/TLR3/CITED2/SGPL1/AR/ZFPM2/FSHR/BC…	80	0.540541
GO:0042063	BP	GO:0042063	gliogenesis	148/6492	310/18903	6.43191e-07	5.26684e-05	3.96884e-05	SOX8/ABCC8/CX3CL1/PAFAH1B1/CNTN1/VIM/MYOC/LAMC3/NTN1/ERBB3/FGF10/PAX2/TP73/LRP2/TREM2/ABL1/PICK1/SLC8A3/E2F1/FA2H/ARHGEF10/ERCC2/PRX/MAG/EZH2/PITX3/ASPA/CCL2/CNTNAP1/AREG/MDK/SOX6/IFNG/NR2E1/HES1/CSPG5/ID2/DLX2/EPHA4/LEPR/CLU/CXCR4/EGR2/LRP1/PLP1/SOX4/MYRF/SOX9/MBOAT7/NKX2-2/BMP2/RRAS/PTPRB/LIF/RNF112/ATP1B2/LDLR/NSUN5/ANO1/LIN28A/ITGB4/WASF3/TRPC4/TSPAN2/IL6ST/CRB1/ANXA1/P2RX4/EMX1/IL6/NKX2-1/BI…	148	0.477419
GO:0023061	BP	GO:0023061	signal release	212/6492	470/18903	6.59666e-07	5.33422e-05	4.01962e-05	ABCC8/NOS2/TFAP2B/CRY1/SYT7/SYT13/APBA2/PTPRN/GAL/MAOB/PFN2/CAMK2A/SREBF1/PTGS2/TACR2/STXBP2/SIRT6/RIMS1/MEF2C/AACS/C1QTNF3/P2RX7/SLC8B1/LTBP4/RAPGEF4/JAK2/PCSK5/LRP5L/PICK1/PCK2/HNF4A/HRH3/SNPH/CDK16/HTR2A/SFRP1/LIN7B/GRIK5/STX1A/GHRHR/TFR2/APBA1/GATA3/RAB11FIP2/CXCL12/PPP3CB/GIT1/P2RX1/CPE/NRXN2/TCIRG1/STX2/IFNG/GLP1R/SLC16A10/SNX4/CSPG5/ACVR2B/IL1A/OTOF/TACR1/PASK/RAB3GAP1/RAP1A/PLA2G4A/WLS/KM…	212	0.451064
GO:0072073	BP	GO:0072073	kidney epithelium development	79/6492	146/18903	7.02837e-07	5.61315e-05	4.22981e-05	SOX8/TFAP2B/PKD1/WWTR1/ACAT1/PAX2/RARB/ARG2/MEF2C/SIX4/SMAD7/SALL1/EYA1/CALB1/SFRP1/GATA3/FGF8/SIM1/HES1/STAT1/WNT6/EPHA4/TCF21/PKD2/EPCAM/CAT/SOX9/PAX8/BMP2/WNK4/SIX1/LIF/FOXJ1/RARA/WNT2B/NOTCH2/EPHA7/EDNRB/MYC/YAP1/FGF2/IQGAP1/GREB1L/SMAD4/OSR1/SLIT2/ADAMTS16/EDNRA/HS3ST3A1/KIF26B/KLF15/SPRY1/BMPER/SHH/ILK/DCHS1/GREM1/GDNF/MTSS1/BCL2/LAMB2/CD34/AQP11/CTNNBIP1/MAGED1/CXCR2/WT1/PBX1/PTCH1/MAGI2/K…	79	0.541096
GO:0051279	BP	GO:0051279	regulation of release of sequestered calcium ion into cytosol	50/6492	82/18903	7.29206e-07	5.75272e-05	4.33498e-05	CX3CL1/ATP1A2/CYBA/BAX/FKBP1A/JPH4/ABL1/BDKRB1/CEMIP/PTPN6/PDE4D/CASQ2/PKD2/HRC/LHCGR/CXCL9/METTL21C/XCL1/TRPC1/SNCA/CAMK2D/ANK2/JPH2/CACNA1C/AKAP6/JPH3/UBASH3B/CLIC2/GPER1/JSRP1/IL13/CXCL10/CXCL11/PRKCE/CHD7/P2RY6/HAP1/CD19/F2/F2R/SLC8A1/PRKD1/PLN/RYR2/CALM1/DMD/LIME1/GSTM2/LYN/ITGB3	50	0.609756
GO:0060348	BP	GO:0060348	bone development	116/6492	233/18903	7.63017e-07	5.94694e-05	4.48133e-05	PAFAH1B1/IGF1/MYOC/FOXN3/CLDN18/IFT80/ATP6AP1/EVC/RARB/MEF2C/EPYC/SNX10/LRP5L/PHEX/ACP5/XYLT1/MEGF8/COMP/DLX5/OGN/FGF8/KAT2A/HSD17B1/ZBTB16/PTPN6/RAB23/SRF/GHR/CDX1/BBX/FOXP1/ITGB6/MEF2D/LEPR/P3H1/TGFB3/TNN/TNFSF11/RUNX2/SOX9/BMP2/SBDS/KDR/RGN/RARA/CHSY1/NOTCH2/TRIM45/ADAMTS7/CHAD/TFAP2A/SULF1/MMP13/BMPR1B/COL2A1/DYM/ECM1/MEIS1/PDGFC/SRD5A1/EBP/SERPINH1/PIP4K2A/ADAMTS12/FLI1/MMP16/FGF18/MMP14/KIT…	116	0.497854
GO:0048738	BP	GO:0048738	cardiac muscle tissue development	119/6492	241/18903	9.48246e-07	7.30263e-05	5.50292e-05	JARID2/IGF1/DSG2/PKP2/COL11A1/ERBB3/MEF2A/TGFBR3/RARB/SIRT6/ACTN2/TP73/MEF2C/LRP2/KCNK2/FKBP1A/TBX5/ABL1/ASB2/MYLK2/SMAD7/FGF9/SGCG/PPP1R13L/WNT2/BMPR1A/FGF8/DKK1/KAT2A/PRKAR1A/IFT20/SOX6/GLI1/BMP5/BVES/SRF/TBX18/HAND1/TNNC1/FOXP1/ID2/RGS2/ACADM/PROX1/TNNT2/ADRA1A/TBX2/BMP2/PRMT1/PARP2/TNNI3/GATA5/RARA/KDM6B/MYH11/MYO18B/NOTCH2/FHOD3/PDGFRA/HEY2/ALPK3/PIM1/YAP1/HCN4/FGF2/TPM1/MYOCD/GATA6/SMAD4/SI…	119	0.493776
GO:0008630	BP	GO:0008630	intrinsic apoptotic signaling pathway in response to DNA damage	59/6492	102/18903	9.69993e-07	7.38221e-05	5.56289e-05	KDM1A/BRCA1/BID/BAK1/FNIP2/TMEM161A/BCL3/POLB/TP63/TP73/BAX/CDIP1/MSH2/SIRT1/ABL1/HMOX1/NFATC4/E2F1/PYCARD/CASP2/CXCL12/SOD2/CLU/SNAI1/CDKN1A/DYRK2/BCL2L2/CASP9/TPT1/CIDEB/BRCA2/PML/EPHA2/MCL1/ACKR3/SFRP2/PIK3R1/NACC2/ATM/BCL2L11/HIPK1/SHISA5/DDIAS/MOAP1/DDIT4/USP47/TRIAP1/BCL2L1/BCL2/RAD9A/PHLDA3/ATAD5/BOK/HIC1/CHEK2/MUC1/MIF/PRKDC/IKBKE	59	0.578431
GO:1901990	BP	GO:1901990	regulation of mitotic cell cycle phase transition	165/6492	354/18903	1.00746e-06	7.57817e-05	5.71056e-05	MAD1L1/KMT2E/PKD1/DPF1/ANLN/BRCA1/BID/FHL1/CUL3/SPDL1/FOXN3/SMARCD1/FGF10/TRIP13/GTSE1/ACTB/JADE1/SMARCA2/RBL1/NDC80/CDC14B/SMARCD3/ORC1/AURKA/BIRC5/TFAP4/CLSPN/CDC6/CDC7/SMARCB1/PSME2/CDC25B/E2F1/RGCC/FBXO31/RBL2/ERCC2/CASP2/EZH2/CDK5RAP3/SMARCD2/CCL2/CCND1/PTPN6/FBXO5/TTK/CCNG1/HYAL1/ID2/MAD2L2/MIIP/CDC20/CENPF/KIF14/PKD2/CCND2/CPSF3/DUSP1/INHBA/ZWINT/CDK2/STIL/CDKN1A/XRCC3/DLGAP5/HSPA2/SMARCA4…	165	0.466102
GO:0050808	BP	GO:0050808	synapse organization	196/6492	432/18903	1.06097e-06	7.88901e-05	5.94479e-05	SEMA3F/MYCBP2/ITGA3/CX3CL1/PAFAH1B1/FYN/MUSK/CDH1/CAMK2B/NTN1/CTNNA2/CACNB1/PFN2/ACTN1/SNCB/ADD2/ACTB/CTTNBP2/OPHN1/MEF2C/PCDHB4/ERC1/IGSF9/NRCAM/TREM2/ABL1/PALM/PICK1/SIX4/SLC8A3/NFATC4/SNTA1/CHRDL1/ZDHHC15/DRP2/CBLN1/EEF2K/ZDHHC2/DMPK/PTPRS/NEURL1/DKK1/CNTNAP1/NRXN2/NEDD9/WASF1/PCDHB2/GABRG2/TANC1/EPHA4/DLGAP3/TNNI3K/IGSF21/CDC20/SLC8A2/NRP2/MYOT/PDZRN3/SLITRK3/RAB17/C3/LRFN3/SIX1/LRRC4/KLK8/FG…	196	0.453704
GO:0007611	BP	GO:0007611	learning or memory	132/6492	273/18903	1.08148e-06	7.95012e-05	5.99084e-05	PRKAR2B/ITGA3/ABCC8/PAFAH1B1/MAPK8IP2/FYN/ATP1A2/MUSK/UBA6/RASGRF1/ABCA7/PRKCZ/PTGS2/TACR2/ITGA8/RAPGEF3/MEF2C/KCNK2/JPH4/TREM2/ITPR3/ABL1/SLC8A3/NFATC4/HTR2A/CALB1/ADAM2/DNAH11/PPP3CB/CPEB3/DKK1/GIT1/KAT2A/IFT20/NRXN2/MDK/NEDD9/GLP1R/SRF/BCHE/TANC1/TACR1/KMT2A/SLC8A2/SGK1/CCND2/EGR2/SLC12A5/ATXN1/OPRL1/LRRN4/THRA/GALR3/SPECC1/TMOD2/KLK8/FGF13/LDLR/SERPINF1/SYT11/EPHB2/MEIS2/NGF/TACO1/TBR1/TLR2/S…	132	0.483516
GO:0070482	BP	GO:0070482	response to oxygen levels	158/6492	337/18903	1.09681e-06	7.97219e-05	6.00747e-05	NOS2/CYBA/RORA/TGFBR3/POLB/ATP6AP1/TFRC/PTGS2/ENO1/KCNK2/PLOD1/MMP2/TREM2/SIRT1/PICK1/HMOX1/SLC8A3/TM9SF4/E2F1/AHCY/SUV39H1/PGK1/RGCC/EEF2K/SFRP1/CAV1/TBL2/CA9/CXCL12/SOD3/CRYAB/SOD2/SRF/CPEB4/SCAP/IL1A/NFE2L2/EPHA4/OPRD1/MPL/FOXO3/PGF/TGFB3/DNMT3A/EGR1/CAT/CXCR4/PLAU/WDR83/PTGIS/HIF3A/BMP2/GNGT1/MYOD1/AJUBA/CBFA2T3/KCNA5/EPO/JUND/LOXL2/VHL/ROCK2/HILPDA/MDM2/BRIP1/SLC2A8/MYC/CPEB2/TLR2/MGARP/THBS…	158	0.468843
GO:0007094	BP	GO:0007094	mitotic spindle assembly checkpoint signaling	32/6492	46/18903	1.15256e-06	8.10427e-05	6.107e-05	MAD1L1/SPDL1/TRIP13/NDC80/BIRC5/TTK/MAD2L2/CDC20/CENPF/DUSP1/ZWINT/XRCC3/CCNB1/CDCA8/APC/NUF2/ATM/INCENP/SPC25/BUB3/BUB1B/SPC24/MAD2L1/PRAP1/PLK1/CDT1/BUB1/ZWILCH/GEN1/AURKB/KNTC1/LCMT1	32	0.695652
GO:0071173	BP	GO:0071173	spindle assembly checkpoint signaling	32/6492	46/18903	1.15256e-06	8.10427e-05	6.107e-05	MAD1L1/SPDL1/TRIP13/NDC80/BIRC5/TTK/MAD2L2/CDC20/CENPF/DUSP1/ZWINT/XRCC3/CCNB1/CDCA8/APC/NUF2/ATM/INCENP/SPC25/BUB3/BUB1B/SPC24/MAD2L1/PRAP1/PLK1/CDT1/BUB1/ZWILCH/GEN1/AURKB/KNTC1/LCMT1	32	0.695652
GO:0071174	BP	GO:0071174	mitotic spindle checkpoint signaling	32/6492	46/18903	1.15256e-06	8.10427e-05	6.107e-05	MAD1L1/SPDL1/TRIP13/NDC80/BIRC5/TTK/MAD2L2/CDC20/CENPF/DUSP1/ZWINT/XRCC3/CCNB1/CDCA8/APC/NUF2/ATM/INCENP/SPC25/BUB3/BUB1B/SPC24/MAD2L1/PRAP1/PLK1/CDT1/BUB1/ZWILCH/GEN1/AURKB/KNTC1/LCMT1	32	0.695652
GO:0034329	BP	GO:0034329	cell junction assembly	195/6492	430/18903	1.1746e-06	8.1704e-05	6.15683e-05	MYCBP2/MUSK/MYOC/VCL/CDH1/EPHA3/GPM6B/ARHGAP6/LAMA3/PKP2/NTN1/SLK/CLDN18/MYO9A/ROCK1/CDH19/ACTN1/FERMT2/CLASP1/ADD2/FSCN1/ACTB/CAMSAP3/ACTN2/OPHN1/MEF2C/PKP1/PCDHB4/EPB41L3/GRHL2/COL16A1/TBX5/NRCAM/SORBS1/ABL1/OCEL1/ARVCF/SH3BP1/SIX4/SMAD7/CBLN1/EEF2K/CORO2B/TJP1/SFRP1/LSR/CAV1/MPDZ/DKK1/CNTNAP1/DUSP3/NRXN2/CORO1C/IL17A/SRF/DUSP22/PCDHB2/GABRG2/CDH6/HRG/ECT2/RAP1A/TEK/SLITRK3/PARD6B/SNAI1/RAB17/L…	195	0.453488
GO:0045841	BP	GO:0045841	negative regulation of mitotic metaphase/anaphase transition	33/6492	48/18903	1.19625e-06	8.23246e-05	6.2036e-05	MAD1L1/SPDL1/TRIP13/NDC80/BIRC5/FBXO5/TTK/MAD2L2/CDC20/CENPF/DUSP1/ZWINT/XRCC3/CCNB1/CDCA8/APC/NUF2/ATM/INCENP/SPC25/BUB3/BUB1B/SPC24/MAD2L1/PRAP1/PLK1/CDT1/BUB1/ZWILCH/GEN1/AURKB/KNTC1/LCMT1	33	0.6875
GO:0000280	BP	GO:0000280	nuclear division	215/6492	481/18903	1.23145e-06	8.38552e-05	6.31894e-05	MAD1L1/NCAPD2/DPF1/ANLN/TACC3/IGF1/CUL3/SPDL1/CUL7/RAD51/NDC1/FOXJ2/SMARCD1/ASPM/RPS6KA2/TRIP13/MOV10L1/CLASP1/ACTB/SPAG5/ZCWPW1/KIF22/SMARCA2/NDC80/CDC14B/SMARCD3/ATRX/RAD54L/AURKA/TPX2/BIRC5/KIF4A/CDC6/RANBP1/SMARCB1/PDGFB/MYBL2/CDC25B/NAA10/RGCC/ARHGEF10/AURKC/CCNE1/HOXA13/FGF8/UBE2S/SMARCD2/NCAPG/RAD51AP1/FBXO5/TTK/SMC4/KAT2B/IL1A/CHMP3/WRAP73/MAD2L2/CDC20/NEK2/CENPF/KIF14/DUSP1/MASTL/NCAPH/M…	215	0.446985
GO:0010038	BP	GO:0010038	response to metal ion	167/6492	360/18903	1.25285e-06	8.44239e-05	6.36179e-05	AOC1/SLC25A13/ABCC8/SYT7/PPP5C/DPEP1/SYT13/OTC/CDH1/HSPA5/GUCA1A/MEF2A/RASGRP2/MAOB/CYBRD1/TFRC/PTGS2/CPOX/MEF2C/ITPKC/ADD1/P2RX7/ITPR3/HMOX1/CPNE6/NFATC4/GSS/MMP9/EEF2K/SLC30A4/PPP2CB/RASA4/CAV1/NUDT1/TFR2/PPIF/HSD17B1/SOD3/CCND1/TCIRG1/KCNA1/SOD2/ECT2/TNNC1/IL1A/SLC30A3/IGFBP2/SLC25A12/NFE2L2/KMT2A/TNNT2/CASQ2/PKD2/DNMT3A/ADCY7/CAT/ACO1/MT1G/SLC25A23/FOSB/SYT5/JUND/SERPINF1/PCNA/SYT11/CASP9/LOX…	167	0.463889
GO:0051960	BP	GO:0051960	regulation of nervous system development	205/6492	456/18903	1.33334e-06	8.89213e-05	6.7007e-05	SEMA3F/KDM1A/SOX8/ABCC8/CX3CL1/PAFAH1B1/SS18L2/SEMA3G/HGF/TYMP/CDH1/RTN4R/CUL7/CAMK2B/NTN1/ASPM/HES2/SEMA3A/WDR62/PLXNA2/CST7/PCM1/TP73/DCT/RAB21/LRP2/SMARCD3/ULK2/DNAJB11/DLL3/SEMA4G/TREM2/NFATC4/E2F1/CBLN1/FBXO31/EEF2K/NUMBL/PTPRS/MEGF8/MAG/WNT2/EZH2/LIMK1/LHX2/CXCL12/BMPR1A/PITX3/NEURL1/DKK1/WNT3/ASPA/RND2/CTSC/MDK/IFNG/NR2E1/SRF/HES1/PLXNA1/TLX2/ID2/SLC25A12/DLX2/EPHA4/PROX1/KIF14/SPP1/HOXB3/…	205	0.449561
GO:0031032	BP	GO:0031032	actomyosin structure organization	103/6492	204/18903	1.35892e-06	8.97028e-05	6.75959e-05	ANLN/MYOC/CUL3/MYOM2/ARHGAP6/ELN/ROCK1/MEF2A/PFN2/FERMT2/CLASP1/ACTN2/RAPGEF3/EPB41L2/EPB41L3/ARHGAP28/EPB41L4B/SORBS1/ABL1/SIX4/MYL9/RGCC/CORO2B/TJP1/SFRP1/ARHGEF10/TNNT1/PIK3R2/MET/LIMK1/PRKAR1A/MYH3/PHACTR1/SRF/ECT2/RTKN/TACR1/CNN3/STMN1/PROX1/APOA1/TNNT2/TGFB3/SORBS3/LDB3/CIT/FLNC/CGNL1/TMOD2/EPB41L4A/CNN1/MYH11/MYO18B/ROCK2/FHOD3/PDGFRA/FHOD1/TMOD1/FHDC1/ARRB1/MYPN/FRMD6/TPM1/SMAD4/ACTA1/CDC…	103	0.504902
GO:0061448	BP	GO:0061448	connective tissue development	132/6492	274/18903	1.38579e-06	9.0552e-05	6.82358e-05	SOX8/PKD1/COL11A1/DGAT2/IFT80/PITX1/EVC/ACAT1/RARB/MEF2C/EPYC/NCOA1/PTHLH/SIRT1/LRP5L/PDGFB/ZNF516/SMAD7/FGF9/TRPS1/SLC39A14/DYRK1B/COMP/OGN/BMPR1A/ACTA2/KAT2A/NKX3-2/PPARGC1A/ZBTB16/MDK/SOX6/FGF6/MGP/BMP5/SRF/GHR/HAND1/ARRDC3/HYAL1/EFEMP1/DLX2/MEF2D/BMP8B/KLF7/HOXB3/SNX19/TGFBI/EGR1/SNAI1/RUNX2/BBS2/SOX9/BMP2/THRA/TRPM4/RARA/CHSY1/MATN3/CHI3L1/LOXL2/WNT2B/SOX5/CDK4/ADAMTS7/SULF1/MMP13/FGF2/BMPR1…	132	0.481752
GO:0001656	BP	GO:0001656	metanephros development	54/6492	92/18903	1.47531e-06	9.54379e-05	7.19176e-05	SOX8/TFAP2B/PKD1/WWTR1/FGF10/ACAT1/PAX2/ITGA8/AKR1B1/PDGFB/SIX4/SALL1/EYA1/CALB1/GATA3/FGF8/HES1/STAT1/APH1A/TCF21/PKD2/EGR1/HOXC11/SOX9/PAX8/SIX1/LIF/FOXJ1/PDGFRA/MYC/YAP1/FRAS1/GREB1L/SMAD4/OSR1/KIF26B/SPRY1/SHH/SOX17/FBN1/GREM1/AQP2/GDNF/BCL2/LAMB2/CD34/CXCR2/WT1/PTCH1/HES5/POU3F3/AQP1/FOXD1/LHX1	54	0.586957
GO:0043270	BP	GO:0043270	positive regulation of ion transport	138/6492	289/18903	1.49445e-06	9.57187e-05	7.21292e-05	CALCR/ABCC8/CX3CL1/EHD3/CNTN1/FHL1/BAK1/PRSS8/KCNH2/PKP2/WNK1/SPHK2/ATP2C2/MYLK/GAL/CAMK2A/TACR2/CACNG4/ACTB/ACTN2/ADCYAP1R1/ABCB1/BAX/P2RX7/TREM2/ABL1/PDGFB/BDKRB1/CEMIP/SCN1B/CAV1/STX1A/CXCL12/PPP3CB/P2RX1/CCL2/WFS1/KCNA1/SLC38A1/IFNG/SNX4/IL1A/RAB3GAP1/PLA2G4A/KMO/VAMP8/PKD2/TNFSF11/PPP3CC/RAMP3/PLP1/WNK4/HSPA2/MCHR1/ATP1B2/RGN/EPHB2/P2RX4/STXBP1/TRPC6/LHCGR/COX17/TRPC3/CXCL9/XCL1/STAC/TRPC1/S…	138	0.477509
GO:0090068	BP	GO:0090068	positive regulation of cell cycle process	126/6492	260/18903	1.61969e-06	0.000102723	7.74073e-05	MAD1L1/KMT2E/DBF4/DDX11/IGF1/CUL3/FGF10/SPAG5/THOC1/NDC80/CDC14B/ATRX/AURKA/BIRC5/CDC6/CDC7/RANBP1/PDGFB/CDC25B/FAM83D/RGCC/AURKC/HOXA13/EZH2/FGF8/NCAPG/CCND1/GLI1/RAD51AP1/FBXO5/SMC4/KAT2B/ECT2/HYAL1/IL1A/CHMP3/KIF14/CCND2/CPSF3/TBX2/NCAPH/GPSM2/CIT/GIPC1/STIL/EREG/XRCC3/DLGAP5/HSPA2/PRDM7/E2F8/KCNA5/CCNB1/ROCK2/CDCA8/ANXA1/CDK4/ESPL1/MDM2/SMC2/DMRT1/NUSAP1/KIF23/KIF20B/CYP1A1/ANAPC11/RPTOR/PLK4…	126	0.484615
GO:0007599	BP	GO:0007599	hemostasis	114/6492	231/18903	1.64301e-06	0.000102809	7.74718e-05	ENPP4/TFPI/PLAUR/VCL/ENTPD2/DGKG/TSPAN32/RAB27A/ACTB/FBLN1/FAP/CPB2/GP6/APOH/TYRO3/JAK2/PDGFB/CTSG/ITPK1/HNF4A/MYL9/GATA1/CD40LG/COMP/CAV1/P2RX1/PF4V1/HGFAC/VWF/PTPN6/SRF/KNG1/HRG/PROC/NFE2L2/PLA2G4A/MPL/F3/SERPINC1/PLAU/F13A1/FOXA2/F10/PROZ/AVPR2/TPH1/F12/EPHB2/VAV3/IL6ST/PDGFRA/IL6/DGKB/BLK/STXBP1/TLR4/TLN1/THBS1/EMILIN1/ENTPD1/MMRN1/SERPINA10/DGKZ/ADRA2A/SLC7A11/FLI1/UBASH3B/PRKCA/GNAQ/DGKI/F1…	114	0.493506
GO:0006941	BP	GO:0006941	striated muscle contraction	93/6492	181/18903	1.65282e-06	0.000102809	7.74718e-05	EHD3/ATP1A2/MAP2K3/DSG2/KCNH2/PKP2/ABCC9/KCNN2/ARG2/SMPX/SLC8A3/MYLK2/SNTA1/SMAD7/PPP1R13L/DMPK/TNNT1/SCN1B/CAV1/MYH3/PDE4D/NUP155/TNNC1/RGS2/TNNI3K/TNNT2/CASQ2/ADRA1A/KCNJ8/CXCR4/NR4A1/FGF13/TNNI3/KCNA5/HRC/TRPM4/TNNI2/MYBPH/DSC2/DTNA/P2RX4/CHRND/BIN1/CHRNA1/HCN4/PDE5A/TPM1/STAC/CAMK2D/ANK2/GSN/SCN2B/CACNA1C/KCNE4/GPD1L/CACNA2D1/CLIC2/RNF207/STC1/TNNI1/MYL3/CCDC78/KCNJ3/LMOD3/ADORA1/UCN/CACNB2/S…	93	0.513812
GO:0045930	BP	GO:0045930	negative regulation of mitotic cell cycle	120/6492	246/18903	1.87503e-06	0.00011552	8.70503e-05	MAD1L1/BRCA1/FHL1/SPDL1/FOXN3/TRIP13/NLE1/TIPIN/GTSE1/JADE1/RBL1/NDC80/CDC14B/ORC1/BIRC5/CLSPN/CDC6/MSH2/ABL1/RGCC/FBXO31/RBL2/CASP2/EZH2/CDK5RAP3/CCL2/CCND1/FBXO5/TTK/CCNG1/BCL6/MAD2L2/MIIP/CDC20/CENPF/PKD2/DUSP1/INHBA/ZWINT/CDK2/CDKN1A/XRCC3/STK33/BTG1/CCNB1/CDCA8/APC/MDM2/KLF4/BTG4/NABP2/PML/TICRR/TOM1L1/NUF2/DTL/FANCD2/CTDSPL/NACC2/ATM/INCENP/CHEK1/SPC25/ZFP36L2/BUB3/EME1/BUB1B/DONSON/BTG2/SP…	120	0.487805
GO:0060562	BP	GO:0060562	epithelial tube morphogenesis	156/6492	335/18903	2.09916e-06	0.000127421	9.60187e-05	SOX8/PKD1/MKS1/CC2D2A/NTN1/TIE1/FGF10/GLI2/PAX2/SIRT6/MEF2C/LRP2/PGR/GRHL2/TMED2/ESR1/ABL1/LRP5L/SIX4/ASB2/NFATC4/SALL4/CTSZ/LAMA1/ESRP2/FOXF1/CLUAP1/SALL1/EYA1/SFRP1/MEGF8/MET/WNT2/LHX2/GATA3/FGF8/KAT2A/AREG/FOLR1/MDK/TIMELESS/BMP5/PTK7/SRF/HAND1/NR3C1/HES1/FOXP1/WNT6/EPHA4/PROX1/TCF21/PKD2/MTHFD1L/TBX2/CXCR4/STIL/SOX4/SOX9/PAX8/BMP2/WNK4/SIX1/KDR/RARA/STARD13/WNT2B/NOTCH2/EPHA7/SPRY2/NKX2-1/MYC…	156	0.465672
GO:0043010	BP	GO:0043010	camera-type eye development	158/6492	340/18903	2.1076e-06	0.000127421	9.60187e-05	WNT16/SOX8/TFAP2B/VIM/BAK1/CC2D2A/RCN1/LAMC3/ATP2B4/CDON/FGF10/PAX2/CRYBG3/SMARCD3/GRHL2/BAX/RPGRIP1/CRYBB3/LRP5L/VSX1/BIRC7/CELF4/LAMA1/RS1/RP1/CALB1/PPP1R13L/SLC17A7/WNT2/CASP2/LHX2/GATA3/PITX3/CRYBA1/B9D1/CRYAB/TCIRG1/MDM1/NR2E1/SRF/HES1/ACVR2B/CLCN2/EFEMP1/WNT6/RAB3GAP1/DLX2/VAX2/MFN2/PROX1/CRYGD/TBX2/INHBA/SOX9/RHOJ/SMARCA4/KDR/NPHP4/RARA/SERPINF1/NES/EPHB2/WNT2B/NOTCH2/CRB1/RAX/MTNR1B/PDGFR…	158	0.464706
GO:0007596	BP	GO:0007596	blood coagulation	111/6492	225/18903	2.28522e-06	0.00013688	0.000103147	ENPP4/TFPI/PLAUR/VCL/ENTPD2/DGKG/TSPAN32/RAB27A/ACTB/FBLN1/FAP/CPB2/GP6/APOH/TYRO3/JAK2/PDGFB/CTSG/ITPK1/HNF4A/MYL9/GATA1/CD40LG/COMP/CAV1/P2RX1/PF4V1/HGFAC/VWF/PTPN6/SRF/KNG1/HRG/PROC/NFE2L2/PLA2G4A/MPL/F3/SERPINC1/PLAU/F13A1/FOXA2/F10/PROZ/F12/EPHB2/VAV3/IL6ST/PDGFRA/IL6/DGKB/BLK/STXBP1/TLR4/TLN1/THBS1/EMILIN1/ENTPD1/MMRN1/SERPINA10/DGKZ/ADRA2A/SLC7A11/UBASH3B/PRKCA/GNAQ/DGKI/F11R/USF1/CSRP1/SC…	111	0.493333
GO:1901991	BP	GO:1901991	negative regulation of mitotic cell cycle phase transition	98/6492	194/18903	2.35612e-06	0.000137437	0.000103566	MAD1L1/BRCA1/FHL1/SPDL1/FOXN3/TRIP13/GTSE1/JADE1/RBL1/NDC80/CDC14B/ORC1/BIRC5/CLSPN/CDC6/RGCC/FBXO31/RBL2/CASP2/EZH2/CDK5RAP3/CCL2/CCND1/FBXO5/TTK/CCNG1/MAD2L2/MIIP/CDC20/CENPF/PKD2/DUSP1/INHBA/ZWINT/CDK2/CDKN1A/XRCC3/CCNB1/CDCA8/APC/MDM2/KLF4/NABP2/PML/TICRR/NUF2/DTL/CTDSPL/NACC2/ATM/INCENP/CHEK1/SPC25/ZFP36L2/BUB3/BUB1B/DONSON/SPC24/TOPBP1/TPRA1/MAD2L1/CHMP4C/DACT1/PRAP1/E2F7/ZFYVE19/WEE1/PLK1/…	98	0.505155
GO:0050817	BP	GO:0050817	coagulation	113/6492	230/18903	2.39558e-06	0.000137437	0.000103566	ENPP4/TFPI/PLAUR/VCL/ENTPD2/DGKG/TSPAN32/RAB27A/ACTB/FBLN1/FAP/CPB2/GP6/APOH/TYRO3/JAK2/PDGFB/CTSG/ITPK1/HNF4A/MYL9/GATA1/CD40LG/COMP/CAV1/P2RX1/PF4V1/HGFAC/VWF/PTPN6/SRF/KNG1/HRG/PROC/NFE2L2/PLA2G4A/MPL/F3/SERPINC1/PLAU/SEMG2/SEMG1/F13A1/FOXA2/F10/PROZ/F12/EPHB2/VAV3/IL6ST/PDGFRA/IL6/DGKB/BLK/STXBP1/TLR4/TLN1/THBS1/EMILIN1/ENTPD1/MMRN1/SERPINA10/DGKZ/ADRA2A/SLC7A11/UBASH3B/PRKCA/GNAQ/DGKI/F11R/U…	113	0.491304
GO:0031577	BP	GO:0031577	spindle checkpoint signaling	32/6492	47/18903	2.42099e-06	0.000137437	0.000103566	MAD1L1/SPDL1/TRIP13/NDC80/BIRC5/TTK/MAD2L2/CDC20/CENPF/DUSP1/ZWINT/XRCC3/CCNB1/CDCA8/APC/NUF2/ATM/INCENP/SPC25/BUB3/BUB1B/SPC24/MAD2L1/PRAP1/PLK1/CDT1/BUB1/ZWILCH/GEN1/AURKB/KNTC1/LCMT1	32	0.680851
GO:0032970	BP	GO:0032970	regulation of actin filament-based process	184/6492	406/18903	2.44326e-06	0.000137437	0.000103566	CX3CL1/ATP1A2/TMSB10/MYOC/CAPG/EPHA3/DSG2/GPM6B/ARHGAP6/ELN/CYFIP2/PKP2/NCKAP1/CTNNA2/ROCK1/PFN2/SPTB/FERMT2/CLASP1/ADD2/FSCN1/ACTN2/RAPGEF3/ADD1/ARHGAP28/MYO3A/ABL1/SH3BP1/PICK1/MYLK2/RGCC/PYCARD/CORO2B/TJP1/SFRP1/ARHGEF10/PIK3R2/CAV1/MET/LIMK1/KANK1/CXCL12/ACTA2/CSF3/RND2/MDK/ARPC3/NEDD9/WASF1/PDE4D/HRG/ECT2/TNNC1/IL1A/SPTBN1/TACR1/RND3/STMN1/PROX1/APOA1/TNNT2/TGFB3/RHOQ/TEK/SORBS3/CIT/NCKAP1L/…	184	0.453202
GO:0022602	BP	GO:0022602	ovulation cycle process	34/6492	51/18903	2.46448e-06	0.000137437	0.000103566	HSPA5/PTPRN/PGR/MMP2/ESR1/SIRT1/AMH/CASP2/FOXO3/TGFB3/INHBA/TNFAIP6/EREG/PDGFRA/CGA/NR5A1/LHCGR/BMPR1B/SCAPER/SLIT2/PAM/ADAMTS1/PTX3/NOS3/SGPL1/KISS1/FSHR/STAT5B/FZD4/GPR149/A2M/SLIT3/ZP3/SRC	34	0.666667
GO:0033046	BP	GO:0033046	negative regulation of sister chromatid segregation	34/6492	51/18903	2.46448e-06	0.000137437	0.000103566	MAD1L1/SPDL1/TRIP13/NDC80/BIRC5/FBXO5/TTK/MAD2L2/CDC20/CENPF/DUSP1/ZWINT/XRCC3/CCNB1/CDCA8/APC/NUF2/ATM/INCENP/SPC25/BUB3/BUB1B/SPC24/MAD2L1/PTTG1/PRAP1/PLK1/CDT1/BUB1/ZWILCH/GEN1/AURKB/KNTC1/LCMT1	34	0.666667
GO:0033048	BP	GO:0033048	negative regulation of mitotic sister chromatid segregation	34/6492	51/18903	2.46448e-06	0.000137437	0.000103566	MAD1L1/SPDL1/TRIP13/NDC80/BIRC5/FBXO5/TTK/MAD2L2/CDC20/CENPF/DUSP1/ZWINT/XRCC3/CCNB1/CDCA8/APC/NUF2/ATM/INCENP/SPC25/BUB3/BUB1B/SPC24/MAD2L1/PTTG1/PRAP1/PLK1/CDT1/BUB1/ZWILCH/GEN1/AURKB/KNTC1/LCMT1	34	0.666667
GO:2000816	BP	GO:2000816	negative regulation of mitotic sister chromatid separation	34/6492	51/18903	2.46448e-06	0.000137437	0.000103566	MAD1L1/SPDL1/TRIP13/NDC80/BIRC5/FBXO5/TTK/MAD2L2/CDC20/CENPF/DUSP1/ZWINT/XRCC3/CCNB1/CDCA8/APC/NUF2/ATM/INCENP/SPC25/BUB3/BUB1B/SPC24/MAD2L1/PTTG1/PRAP1/PLK1/CDT1/BUB1/ZWILCH/GEN1/AURKB/KNTC1/LCMT1	34	0.666667
GO:0014706	BP	GO:0014706	striated muscle tissue development	124/6492	257/18903	2.58636e-06	0.000143002	0.000107759	LUC7L/JARID2/IGF1/DSG2/PKP2/COL11A1/ERBB3/MEF2A/TGFBR3/RARB/SIRT6/ACTN2/TP73/MEF2C/LRP2/KCNK2/FKBP1A/TBX5/ABL1/ASB2/MYLK2/SMAD7/FGF9/SGCG/EYA1/PPP1R13L/WNT2/BMPR1A/FGF8/DKK1/KAT2A/PRKAR1A/IFT20/SOX6/GLI1/BMP5/BVES/SRF/TBX18/HAND1/TNNC1/FOXP1/ID2/RGS2/ACADM/PROX1/CENPF/TNNT2/ADRA1A/TBX2/BMP2/PRMT1/PARP2/TNNI3/GATA5/RARA/KDM6B/MYH11/MYO18B/NOTCH2/FHOD3/PDGFRA/HEY2/ALPK3/PIM1/YAP1/HCN4/FGF2/TPM1/MYO…	124	0.48249
GO:0048736	BP	GO:0048736	appendage development	91/6492	178/18903	2.79933e-06	0.000152175	0.000114672	DLX6/TFAP2B/MKS1/BAK1/IFT80/PITX1/FGF10/TP63/FERMT2/PLXNA2/RARB/GRHL2/ATRX/BAX/TBX5/PCSK5/SALL4/RSPO4/FGF9/SALL1/MEGF8/COMP/DLX5/HOXA13/MEOX2/BMPR1A/FGF8/DKK1/WNT3/B9D1/KAT2A/MYH3/ZBTB16/KAT2B/TBX2/TBX4/RECK/HOXC13/HOXC11/SOX4/RUNX2/SOX9/KREMEN2/RARA/ITGB4/NOTCH2/RAX/LRP4/TFAP2A/FRAS1/FBN2/COL2A1/SMAD4/SLC39A3/SLC39A1/OSR1/AFF3/SFRP2/PAM/RSPO2/FREM2/SLC7A11/CACNA1C/MBNL1/BCL2L11/WNT7A/SKI/FLVCR1/…	91	0.511236
GO:0060173	BP	GO:0060173	limb development	91/6492	178/18903	2.79933e-06	0.000152175	0.000114672	DLX6/TFAP2B/MKS1/BAK1/IFT80/PITX1/FGF10/TP63/FERMT2/PLXNA2/RARB/GRHL2/ATRX/BAX/TBX5/PCSK5/SALL4/RSPO4/FGF9/SALL1/MEGF8/COMP/DLX5/HOXA13/MEOX2/BMPR1A/FGF8/DKK1/WNT3/B9D1/KAT2A/MYH3/ZBTB16/KAT2B/TBX2/TBX4/RECK/HOXC13/HOXC11/SOX4/RUNX2/SOX9/KREMEN2/RARA/ITGB4/NOTCH2/RAX/LRP4/TFAP2A/FRAS1/FBN2/COL2A1/SMAD4/SLC39A3/SLC39A1/OSR1/AFF3/SFRP2/PAM/RSPO2/FREM2/SLC7A11/CACNA1C/MBNL1/BCL2L11/WNT7A/SKI/FLVCR1/…	91	0.511236
GO:0050890	BP	GO:0050890	cognition	147/6492	314/18903	2.82959e-06	0.000152538	0.000114946	PRKAR2B/ITGA3/ABCC8/PAFAH1B1/MAPK8IP2/FYN/ATP1A2/MUSK/UBA6/RASGRF1/ABCA7/PRKCZ/PTGS2/TACR2/ITGA8/RAPGEF3/MEF2C/KCNK2/TMPRSS11E/JPH4/TREM2/ITPR3/ABL1/SLC8A3/NFATC4/HRH3/HTR2A/CALB1/TUSC3/ADAM2/DNAH11/PPP3CB/CPEB3/DKK1/GIT1/KAT2A/IFT20/NRXN2/MDK/NEDD9/GLP1R/SOBP/SRF/BCHE/TANC1/TACR1/SLC1A4/KMT2A/SLC8A2/SGK1/CCND2/EGR2/SLC12A5/ATXN1/OPRL1/LRRN4/THRA/GALR3/SPECC1/TMOD2/KLK8/FGF13/LDLR/NSUN5/SERPINF1/…	147	0.468153
GO:0007051	BP	GO:0007051	spindle organization	98/6492	195/18903	3.14919e-06	0.000168365	0.000126872	PKD1/TACC3/MAP4/ASPM/EML1/CLASP1/WDR62/SPAG5/NDC80/ATRX/AURKA/TPX2/KIZ/BIRC5/KIF4A/EZR/MYBL2/RAE1/DCTN6/ARHGEF10/AURKC/FSD1/FBXO5/TTK/CEP72/CHMP3/WRAP73/CDC20/STMN1/NEK2/GPSM2/STIL/FAM110A/SBDS/DLGAP5/AUNIP/GNAI1/KNSTRN/HAUS8/TUBG1/CCNB1/PSRC1/CDCA8/ESPL1/BORA/KIF23/KIF11/TACC2/CENPE/NCOR1/NUF2/ANKRD53/CHMP7/TACC1/HAUS6/INCENP/NEK7/HAUS1/SPC25/TRIM36/CENPH/CCSAP/SASS6/CCNB2/STARD9/RACGAP1/SPICE1/…	98	0.502564
GO:0072009	BP	GO:0072009	nephron epithelium development	64/6492	116/18903	3.24868e-06	0.00017226	0.000129807	SOX8/TFAP2B/PKD1/WWTR1/ACAT1/PAX2/MEF2C/SIX4/SALL1/EYA1/CALB1/GATA3/FGF8/HES1/STAT1/WNT6/TCF21/PKD2/SOX9/PAX8/BMP2/WNK4/SIX1/LIF/FOXJ1/WNT2B/NOTCH2/EDNRB/MYC/YAP1/FGF2/IQGAP1/GREB1L/SMAD4/OSR1/ADAMTS16/EDNRA/HS3ST3A1/KIF26B/KLF15/SHH/ILK/DCHS1/GREM1/GDNF/MTSS1/BCL2/LAMB2/CD34/AQP11/CTNNBIP1/MAGED1/WT1/PBX1/PTCH1/MAGI2/HES5/POU3F3/AQP1/FOXD1/HOXB7/PECAM1/CD24/LHX1	64	0.551724
GO:0072080	BP	GO:0072080	nephron tubule development	55/6492	96/18903	3.36403e-06	0.000176926	0.000133323	SOX8/TFAP2B/PKD1/WWTR1/ACAT1/PAX2/MEF2C/SIX4/SALL1/EYA1/CALB1/GATA3/FGF8/HES1/STAT1/WNT6/TCF21/PKD2/SOX9/PAX8/BMP2/WNK4/SIX1/LIF/WNT2B/NOTCH2/MYC/YAP1/FGF2/GREB1L/SMAD4/OSR1/ADAMTS16/HS3ST3A1/KIF26B/SHH/ILK/DCHS1/GREM1/GDNF/MTSS1/BCL2/AQP11/CTNNBIP1/MAGED1/WT1/PBX1/PTCH1/HES5/POU3F3/AQP1/FOXD1/HOXB7/CD24/LHX1	55	0.572917
GO:0048536	BP	GO:0048536	spleen development	26/6492	36/18903	3.90172e-06	0.000203183	0.000153109	JARID2/BCL3/FGF10/POLB/CDH17/PPP2R3C/ABL1/NKX3-2/KMT2A/TCF21/NKX2-3/BARX1/RC3H1/ADAM17/BCL2L11/FLVCR1/PITX2/CITED2/FADD/ONECUT1/BCL2/CTC1/CACNB4/HOXB4/NKX2-5/PBX1	26	0.722222
GO:0055001	BP	GO:0055001	muscle cell development	96/6492	191/18903	3.92609e-06	0.000203183	0.000153109	KDM1A/IGF1/MYOM2/MEF2A/ACTN1/ACTN2/TBX5/SIX4/ASB2/NFATC4/NFATC2/MYL9/TNNT1/COMP/PPP3CB/BMPR1A/CNTNAP1/PRKAR1A/MYH3/BVES/SRF/TBX18/HES1/FOXP1/RGS2/PROX1/TNNT2/ADRA1A/LDB3/SIX1/WFIKKN1/FLNC/TMOD2/MYOD1/PARP2/RAMP2/MYH11/MYO18B/FHOD3/PDGFRA/HEY2/DYSF/ALPK3/BIN1/TMOD1/MYOF/MYPN/TPM1/SMAD4/SYPL2/ACTA1/ANK2/ANKRD1/ITGB1/AKAP6/EDNRA/PGM5/SORBS2/CXADR/KLHL40/SKI/CSRP1/RCAN1/ACTC1/G6PD/LMNA/SGCB/PDLIM5/AN…	96	0.502618
GO:0022617	BP	GO:0022617	extracellular matrix disassembly	39/6492	62/18903	4.03596e-06	0.000207211	0.000156145	CLASP1/FSCN1/FAP/MMP2/CMA1/MMP11/CTSG/MMP9/MMP15/HPN/MMP8/LRP1/LAMC1/IL6/CTSV/MMP7/MMP20/MMP13/ADAM10/ADAM15/ADAM8/ADAMTS5/MMP14/ADAMTS4/DDR2/PBXIP1/ADAMTS15/WDR72/MMP10/KLK4/KLK5/KLK7/TPSAB1/SH3PXD2B/TMPRSS6/MMP1/ELANE/DDR1/PRSS1	39	0.629032
GO:0006260	BP	GO:0006260	DNA replication	135/6492	286/18903	4.1527e-06	0.000211526	0.000159396	DBF4/NFIX/REV3L/BRCA1/DDX11/POLA2/PNKP/JADE2/RFC2/RAD51/POLQ/POLD1/WDR18/MCM10/POLB/MCM2/GLI2/TIPIN/MCM6/JADE1/THOC1/ATRX/ORC1/ORC6/CDC45/CDC6/CDC7/CDC34/MCM5/POLE2/GINS1/SAMHD1/ACTR5/MCM4/RNASEH2A/CCNE1/LIG1/TFPT/DNAJC2/RPA3/POLD2/RECQL5/GLI1/RFC5/TIMELESS/FBXO5/MCM3/GMNN/BCL6/INO80B/POLK/CDK2/WRNIP1/EREG/DTD1/MGME1/MCM8/CHTF18/E2F8/MAS1/GINS2/PCNA/NASP/RFC3/LPIN1/ACTL6A/DSCC1/HMGA1/ZNF365/DNA2/…	135	0.472028
GO:0022898	BP	GO:0022898	regulation of transmembrane transporter activity	137/6492	291/18903	4.20591e-06	0.000211604	0.000159455	HECW1/ABCC8/MAPK8IP2/EHD3/ATP1A2/FHL1/KCNG1/RASGRF1/WNK1/SPHK2/CACNB1/ABCC9/GAL/GNB5/CACNG4/ACTB/ACTN2/MEF2C/ABCB1/REM1/FKBP1A/JPH4/TREM2/HCN2/MMP9/SCN1B/CAV1/PPP3CB/PPIF/CCL2/KCNA1/IFNG/PDE4D/CASQ2/PKD2/PPP3CC/KCNS1/AHNAK/OPRL1/WNK4/HSPA2/ATP1B2/FGF13/EPO/HRC/RGN/CHRM3/EPHB2/GRP/MTNR1B/TACO1/PIM1/TRPC6/FXYD6/COX17/HCN4/HCN3/OSR1/STAC/SNCA/CAMK2D/ANK2/CRHBP/CRH/STOM/SCN2B/JPH2/ITGB1/FXYD4/ADRA2A/…	137	0.47079
GO:0006270	BP	GO:0006270	DNA replication initiation	27/6492	38/18903	4.22018e-06	0.000211604	0.000159455	POLA2/MCM10/MCM2/MCM6/ORC1/ORC6/CDC45/CDC6/CDC34/MCM5/MCM4/CCNE1/MCM3/GMNN/CDK2/WRNIP1/TICRR/PRIM2/LRWD1/TOPBP1/MCM7/CDT1/CCNE2/GINS3/PURA/PRIM1/MCIDAS	27	0.710526
GO:0044262	BP	GO:0044262	cellular carbohydrate metabolic process	139/6492	296/18903	4.25237e-06	0.000211604	0.000159455	PDK4/PDK2/CRY1/IGF1/PHKA2/DGAT2/HDAC4/INPP5A/PYGM/RORA/ACACB/SIRT6/SYNJ2/ADCYAP1R1/DUSP12/C1QTNF3/GCKR/XYLB/SORBS1/SIRT1/MIOX/ITPK1/PCK2/PYGB/PHKB/HAS3/MLYCD/HAS1/ISYNA1/MOGAT3/PRKAG2/GIT1/GALK1/KAT2A/INPP4B/PPARGC1A/TPI1/GYS2/NR3C1/KAT2B/PFKFB4/PASK/SLC25A12/LCT/LEPR/PLA2G4A/ACADM/TREH/OCRL/NLN/FOXA2/DYRK2/IDUA/CBFA2T3/MAS1/RGN/ENOSF1/PER2/ANGPTL3/IL6ST/PPP1R1A/ITPKA/LHCGR/GABARAPL1/NCOR1/IMPA2/…	139	0.469595
GO:0035637	BP	GO:0035637	multicellular organismal signaling	87/6492	170/18903	4.34317e-06	0.000214473	0.000161617	PAFAH1B1/EHD3/ATP1A2/TYMP/DSG2/KCNH2/PKP2/ATP2B4/DMRT3/ATP2B3/MEF2A/ABCC9/ATP2A3/CACNG4/KCNN2/TBX5/NRCAM/HCN2/CACNA1I/SLC8A3/ATP1A3/MAG/SCN1B/CAV1/P2RX1/CNTNAP1/KCNA1/TBX18/PDE4D/NUP155/TNNI3K/SLC8A2/CASQ2/ATP1B2/KCNA5/HRC/TRPM4/MTNR1B/DSC2/P2RX4/SCN7A/BIN1/CHRNA1/HCN4/HCN3/TRPC1/CORIN/CAMK2D/ANK2/SCN2B/CACNA1C/KCNE4/CACNA2D1/CXADR/RNF207/SPTBN4/KCNJ3/NFASC/GRIK2/GPER1/CACNB2/JAM3/AVPR1A/SCN3B/SC…	87	0.511765
GO:0072234	BP	GO:0072234	metanephric nephron tubule development	17/6492	20/18903	4.48199e-06	0.000219651	0.000165519	SOX8/PKD1/WWTR1/ACAT1/PAX2/CALB1/HES1/STAT1/PKD2/SOX9/PAX8/LIF/YAP1/OSR1/HES5/POU3F3/AQP1	17	0.85
GO:0061326	BP	GO:0061326	renal tubule development	56/6492	99/18903	4.71953e-06	0.000227916	0.000171747	SOX8/TFAP2B/PKD1/WWTR1/ACAT1/PAX2/MEF2C/SIX4/SALL1/EYA1/CALB1/GATA3/FGF8/HES1/STAT1/WNT6/TCF21/PKD2/SOX9/PAX8/BMP2/WNK4/SIX1/LIF/WNT2B/NOTCH2/MYC/YAP1/FGF2/LGR5/GREB1L/SMAD4/OSR1/ADAMTS16/HS3ST3A1/KIF26B/SHH/ILK/DCHS1/GREM1/GDNF/MTSS1/BCL2/AQP11/CTNNBIP1/MAGED1/WT1/PBX1/PTCH1/HES5/POU3F3/AQP1/FOXD1/HOXB7/CD24/LHX1	56	0.565657
GO:0031589	BP	GO:0031589	cell-substrate adhesion	168/6492	369/18903	4.72109e-06	0.000227916	0.000171747	ITGA3/ITGA2B/CX3CL1/PKD1/MYOC/VCL/EPHA3/GPM6B/ARHGAP6/LAMC3/PKP2/SLK/PRKCZ/ROCK1/ACTN1/LIMS2/FERMT2/CLASP1/CAMSAP3/ACTN2/FBLN1/ITGA8/COL5A3/COL16A1/EPDR1/CCDC80/TYRO3/UNC13D/SORBS1/JAK2/ABL1/MADCAM1/PDGFB/FERMT1/MSLN/FOXF1/CORO2B/SFRP1/MEGF9/ECM2/KANK1/ATRNL1/DUSP3/TECTA/MDK/VWF/CORO1C/NEDD9/BVES/SRF/DUSP22/HRG/BCL6/CSPG5/ITGB6/NID1/APOA1/KIF14/ONECUT2/TEK/TNN/SORBS3/PLAU/RRAS/MACF1/SGCE/KDR/ATP1…	168	0.455285
GO:0021700	BP	GO:0021700	developmental maturation	142/6492	304/18903	4.80919e-06	0.000230243	0.000173501	KDM1A/SOX8/CX3CL1/IGF1/MYOC/NSUN2/PTPRN/CAMK2B/CDH3/ROPN1/CBFB/IFT80/GAL/CNGB1/EPHA8/RPS6KA2/TRIP13/SCARF1/PAX2/PGR/AKR1B1/SNX10/MMP2/AURKA/NRCAM/SLC26A3/PALM/PICK1/NFATC4/VSX1/TRPC4AP/CDC25B/FERMT1/CHRDL1/ZDHHC15/XYLT1/ZDHHC2/ERCC2/GHRHR/LHX6/GATA3/NEURL1/ZBTB16/FBXO5/CCR6/HES1/PCSK4/IGSF21/CDC20/KIF14/FOXO3/SNX19/PAEP/RECK/SEMG2/SEMG1/RUNX2/EREG/C3/BMP2/KLF2/KDR/EPO/UNC13A/MAP1B/BCAN/SPINK5/EDN…	142	0.467105
GO:1902100	BP	GO:1902100	negative regulation of metaphase/anaphase transition of cell cycle	33/6492	50/18903	4.84049e-06	0.000230243	0.000173501	MAD1L1/SPDL1/TRIP13/NDC80/BIRC5/FBXO5/TTK/MAD2L2/CDC20/CENPF/DUSP1/ZWINT/XRCC3/CCNB1/CDCA8/APC/NUF2/ATM/INCENP/SPC25/BUB3/BUB1B/SPC24/MAD2L1/PRAP1/PLK1/CDT1/BUB1/ZWILCH/GEN1/AURKB/KNTC1/LCMT1	33	0.66
GO:0051899	BP	GO:0051899	membrane depolarization	49/6492	84/18903	5.68057e-06	0.000268231	0.000202126	DCN/ATP1A2/FHL1/GCLM/MYOC/BEST2/KCNH2/PRKCZ/CNGB1/P2RX7/TBX5/PPP2R3C/ABL1/HCN2/CACNA1I/SMAD7/SCN1B/CAV1/KMT2A/IFI6/KDR/TRPM4/P2RX4/SCN7A/HCN4/HCN3/CAMK2D/ANK2/CHRNA6/SCN2B/CACNA1C/GPD1L/CACNA2D1/CHRNB2/SLMAP/CACNB2/SCN3B/SCN11A/BCL2/CHRNA9/BOK/SCN4B/SLC8A1/FZD9/LRRK2/CACNA1H/SCN8A/SRC/MLLT11	49	0.583333
GO:0003007	BP	GO:0003007	heart morphogenesis	123/6492	258/18903	5.96634e-06	0.000279683	0.000210756	WNT16/MKS1/ELN/PKP2/COL11A1/TGFBR3/MEF2C/LRP2/SMARCD3/GRHL2/TMED2/FKBP1A/TBX5/ASB2/MYLK2/CCM2L/SMAD7/FOXF1/CLUAP1/EYA1/PPP1R13L/MEGF8/DNAH11/WNT2/GATA3/BMPR1A/FGF8/DKK1/CPE/FOLR1/BMP5/SRF/HAND1/HES1/TNNC1/PROX1/TNNT2/NRP2/PKD2/TEK/TBX2/STIL/SNAI1/SOX4/SOX9/BMP2/SIX1/TNNI3/OLFM1/GATA5/NOTCH2/HEY2/MDM2/HTR2B/PIM1/YAP1/LBX1/COL2A1/FOXN4/ACVRL1/TPM1/GATA6/SMAD4/TBX19/ADAM15/SLIT2/SFRP2/ANKRD1/PDCD4/E…	123	0.476744
GO:0140014	BP	GO:0140014	mitotic nuclear division	150/6492	325/18903	6.02242e-06	0.000280281	0.000211206	MAD1L1/NCAPD2/DPF1/ANLN/TACC3/IGF1/CUL3/SPDL1/CUL7/SMARCD1/TRIP13/CLASP1/ACTB/SPAG5/KIF22/SMARCA2/NDC80/CDC14B/SMARCD3/ATRX/AURKA/TPX2/BIRC5/KIF4A/CDC6/RANBP1/SMARCB1/PDGFB/MYBL2/NAA10/RGCC/ARHGEF10/AURKC/HOXA13/FGF8/UBE2S/SMARCD2/NCAPG/FBXO5/TTK/SMC4/KAT2B/IL1A/CHMP3/WRAP73/MAD2L2/CDC20/NEK2/CENPF/KIF14/DUSP1/NCAPH/KIF18A/ZWINT/CENPK/EREG/KIF25/XRCC3/DLGAP5/PKMYT1/SMARCA4/KNSTRN/PHF10/CEP85/TUBG…	150	0.461538
GO:0042445	BP	GO:0042445	hormone metabolic process	116/6492	241/18903	6.18284e-06	0.000285692	0.000215284	IYD/HSD17B6/CYP46A1/DKK3/DGAT2/GAL/CYP2W1/DHRS9/RDH8/AKR1B1/ESR1/CMA1/CYP26A1/PCSK5/CYP2D6/CTSG/CTSZ/PCSK1N/CRYM/CPQ/LHB/IL4I1/SLC5A5/HPN/GHRHR/GATA3/HSD17B1/SULT1E1/NFKB1/CPE/CYP27B1/BMP5/SLC16A10/MEP1A/GHR/NR3C1/BCHE/CLCN2/PCSK4/TPO/TTR/SPP1/PRLHR/EGR1/LRAT/AKR1D1/CHST8/PAX8/BMP2/PCSK2/SRD5A3/HSD17B3/STARD3/HSD17B7/PDGFRA/CGA/RDH5/EDNRB/NR5A1/ADAM10/LHCGR/CYP1B1/CYP2C9/CYP2C8/SLCO1C1/RDH16/RDH1…	116	0.481328
GO:0033674	BP	GO:0033674	positive regulation of kinase activity	217/6492	496/18903	6.77634e-06	0.000310895	0.000234276	CAMKK1/DBF4/PKD1/GPRC5A/IGF1/SLC11A1/MUSK/MAP2K3/EPHA3/ROS1/KITLG/TAB2/ATP2B4/WNK1/LTK/ERBB3/TIE1/PRKCZ/EPHA8/FERMT2/TRAF4/FGFR1/EPHA6/MEF2C/DUSP12/TPX2/P2RX7/PPP2R3C/TYRO3/CLSPN/CDC6/TREM2/SIRT1/JAK2/ABL1/PDGFB/TCL1A/TELO2/EEF1A2/CDC25B/RASSF2/CD40LG/HTR2A/RGCC/VAC14/CEMIP/PIH1D1/MET/EZH2/PRKAG2/BMPR1A/NEURL1/DKK1/UNC119/AREG/IL2/CCND1/CD81/IL23A/IFNG/NEDD9/TPD52L1/SASH1/GHR/HBEGF/PDCD10/ECT2/AC…	217	0.4375
GO:0007204	BP	GO:0007204	positive regulation of cytosolic calcium ion concentration	101/6492	205/18903	6.86979e-06	0.000312962	0.000235834	CALCR/PKD1/BAK1/PTGER3/LPAR2/LRP6/ADCYAP1R1/P2RY10/BAX/P2RX7/ESR1/JPH4/ITPR3/JAK2/ABL1/BDKRB1/GATA1/HTR2A/CAV1/IL2/GLP1R/CCR6/KNG1/TACR1/PKD2/ADRA1A/CXCR4/PTGFR/OPRL1/S1PR4/MCHR1/ACKR4/EPO/TRPM4/SWAP70/HRH4/PDGFRA/P2RX4/GPR55/EDNRB/TRPC6/LHCGR/TRPC3/PML/ADCYAP1/CACNA1A/GPR17/ACKR3/ACKR2/AGTR1/HTR2C/JPH2/CACNA1C/EDNRA/CCL28/CACNA2D1/JPH3/CXCL13/NPTN/GNG3/CXCR1/GPER1/CDK5/CACNB2/AVPR1A/RIC3/GALR1/C…	101	0.492683
GO:0009410	BP	GO:0009410	response to xenobiotic stimulus	192/6492	432/18903	6.95815e-06	0.000314771	0.000237197	ITGA3/ABCC8/NOS2/TFAP2B/DPEP1/GCLM/BAK1/OTC/CYP46A1/CDH1/HSPA5/RAD51/CYBA/KCNH2/PPP1R12A/CDH3/AHRR/GSTO2/GAL/MAOB/RORA/TFRC/SREBF1/CYP2W1/PTGS2/ACACB/ADCYAP1R1/TP73/SLC1A3/CPB2/MEF2C/ABCB1/RAD54L/MMP2/P2RX7/FMO2/CYP26A1/ABL1/CYP2D6/RHBDD3/HMOX1/CBX7/SLC10A1/HNF4A/NFATC2/E2F1/HTR2A/SLC6A2/TRPA1/SFRP1/AMH/FGF21/CA9/GATA3/RECQL5/EFTUD2/CCND1/MDK/CD69/SLCO1B3/SOD2/BCHE/UMPS/AADAC/STAT1/IGFBP2/NFE2L2/…	192	0.444444
GO:0010001	BP	GO:0010001	glial cell differentiation	110/6492	227/18903	7.23319e-06	0.000324941	0.00024486	SOX8/CNTN1/VIM/MYOC/LAMC3/ERBB3/FGF10/PAX2/TP73/TREM2/ABL1/PICK1/SLC8A3/FA2H/ARHGEF10/ERCC2/PRX/MAG/ASPA/CNTNAP1/MDK/SOX6/IFNG/NR2E1/HES1/CSPG5/ID2/DLX2/EPHA4/CLU/CXCR4/EGR2/LRP1/PLP1/SOX4/MYRF/SOX9/NKX2-2/BMP2/LIF/RNF112/LDLR/NSUN5/ANO1/LIN28A/ITGB4/WASF3/TRPC4/TSPAN2/IL6ST/CRB1/EMX1/IL6/NKX2-1/BIN1/TLR4/IL33/GCM1/TLR2/ZNF365/FGF5/FGF2/NTRK3/ERBB2/S100A8/GPR17/DLX1/DAAM2/TTBK1/NFIB/PARD3/VAX1/TE…	110	0.484581
GO:0034764	BP	GO:0034764	positive regulation of transmembrane transport	114/6492	237/18903	7.68761e-06	0.000342973	0.000258449	CALCR/ABCC8/CX3CL1/EHD3/IGF1/BAK1/OPN3/KCNH2/WNK1/MEF2A/GAL/CACNG4/ACTN2/ADCYAP1R1/ABCB1/BAX/P2RX7/SORBS1/TREM2/ABL1/BDKRB1/CEMIP/CA2/CLIP3/FGF21/CAV1/PPP3CB/P2RX1/CCL2/KCNA1/CREBL2/SLC38A1/IFNG/NFE2L2/PKD2/NR4A3/RHOQ/PPP3CC/RAMP3/PLP1/C3/WNK4/HSPA2/ATP1B2/RGN/EPHB2/P2RX4/TRPC6/LHCGR/COX17/TRPC3/CXCL9/XCL1/STAC/TRPC1/SNCA/ANK2/PIK3R1/KCNMB1/JPH2/ITGB1/AKAP6/EDNRA/CNKSR3/CACNA2D1/RNF207/PINK1/IFNG…	114	0.481013
GO:0003207	BP	GO:0003207	cardiac chamber formation	13/6492	14/18903	8.75376e-06	0.000387863	0.000292276	MEF2C/SMARCD3/TBX5/HAND1/TBX2/SOX4/BMP2/EDNRA/HAND2/TBX20/MESP1/SOX11/NKX2-5	13	0.928571
GO:0051985	BP	GO:0051985	negative regulation of chromosome segregation	34/6492	53/18903	8.92095e-06	0.00038993	0.000293833	MAD1L1/SPDL1/TRIP13/NDC80/BIRC5/FBXO5/TTK/MAD2L2/CDC20/CENPF/DUSP1/ZWINT/XRCC3/CCNB1/CDCA8/APC/NUF2/ATM/INCENP/SPC25/BUB3/BUB1B/SPC24/MAD2L1/PTTG1/PRAP1/PLK1/CDT1/BUB1/ZWILCH/GEN1/AURKB/KNTC1/LCMT1	34	0.641509
GO:1905819	BP	GO:1905819	negative regulation of chromosome separation	34/6492	53/18903	8.92095e-06	0.00038993	0.000293833	MAD1L1/SPDL1/TRIP13/NDC80/BIRC5/FBXO5/TTK/MAD2L2/CDC20/CENPF/DUSP1/ZWINT/XRCC3/CCNB1/CDCA8/APC/NUF2/ATM/INCENP/SPC25/BUB3/BUB1B/SPC24/MAD2L1/PTTG1/PRAP1/PLK1/CDT1/BUB1/ZWILCH/GEN1/AURKB/KNTC1/LCMT1	34	0.641509
GO:0010720	BP	GO:0010720	positive regulation of cell development	142/6492	307/18903	9.15019e-06	0.000396515	0.000298795	KDM1A/SOX8/CX3CL1/PAFAH1B1/SS18L2/MYOC/CUL7/CAMK2B/NTN1/ASPM/LIMS2/FERMT2/WDR62/PLXNA2/TP73/DCT/RAB21/LRP2/SMARCD3/ADD1/AURKA/UNC13D/ABL1/E2F1/SMAD7/FBXO31/EEF2K/NUMBL/MEGF8/MAG/WNT2/LIMK1/CXCL12/NEURL1/WNT3/ASPA/RND2/MDK/IFNG/NEDD9/NR2E1/SRF/HES1/PLXNA1/CSPG5/PROC/ID2/EPHA4/MPL/APOA1/TNFSF11/CXCR4/EGR2/NKX2-2/BMP2/MACF1/LIF/RNF112/MYOD1/PLXNA3/MAP1B/SERPINF1/EPHB2/NGF/IL6ST/IL6/BIN1/IL33/TLR2/IT…	142	0.462541
GO:0000082	BP	GO:0000082	G1/S transition of mitotic cell cycle	119/6492	250/18903	9.19419e-06	0.000396515	0.000298795	KMT2E/DBF4/PKD1/DPF1/BID/FHL1/CUL3/CDK17/BCAT1/SMARCD1/FGF10/CAMK2A/GTSE1/ACTB/JADE1/SMARCA2/RBL1/SMARCD3/CDC6/CDC7/CDC34/SMARCB1/CDKN3/PSME2/E2F1/CDK16/RGCC/FBXO31/RBL2/CCNE1/CASP2/EZH2/SMARCD2/CCL2/CCND1/PTPN6/E2F3/HYAL1/ID2/CDK18/KIF14/PKD2/CCND2/CPSF3/INHBA/CDK2/STIL/CDKN1A/SMARCA4/PHF10/KCNA5/NASP/CDK7/APC/ANXA1/CDK4/MDM2/ACTL6A/KLF4/MYC/CDK15/PML/CYP1A1/RPTOR/TM4SF5/CTDSPL/SKP2/CDKN2A/NACC2…	119	0.476
GO:0044843	BP	GO:0044843	cell cycle G1/S phase transition	131/6492	280/18903	9.96257e-06	0.000426807	0.000321622	KMT2E/DBF4/PKD1/DPF1/BID/FHL1/CUL3/ATP2B4/CDK17/BCAT1/SMARCD1/FGF10/CAMK2A/GTSE1/ACTB/JADE1/SMARCA2/RBL1/SMARCD3/CDC6/CDC7/CDC34/SMARCB1/SUSD2/CDKN3/PSME2/E2F1/FAM83D/CDK16/RGCC/FBXO31/RBL2/CCNE1/CASP2/EZH2/SMARCD2/CCL2/CCND1/GLI1/PTPN6/E2F3/HYAL1/ID2/CDK18/KIF14/PKD2/CCND2/CPSF3/TBX2/INHBA/CDK2/STIL/CDKN1A/SMARCA4/PHF10/KCNA5/NASP/MEN1/CDK7/APC/ANXA1/CDK4/MDM2/ACTL6A/KLF4/MYC/CDK15/PML/CYP1A1/RP…	131	0.467857
GO:0030168	BP	GO:0030168	platelet activation	70/6492	133/18903	1.06248e-05	0.000449483	0.000338709	VCL/ENTPD2/DGKG/TSPAN32/ACTB/GP6/TYRO3/JAK2/PDGFB/CTSG/MYL9/GATA1/CD40LG/COMP/P2RX1/PF4V1/VWF/PTPN6/SRF/HRG/PLA2G4A/MPL/VAV3/IL6ST/PDGFRA/IL6/DGKB/BLK/STXBP1/TLR4/TLN1/MMRN1/DGKZ/ADRA2A/SLC7A11/UBASH3B/PRKCA/GNAQ/DGKI/F11R/CSRP1/VAV2/NOS3/FZD6/FUNDC2/ILK/AXL/P2RY12/P2RY1/FGG/FGA/FGB/FIBP/SAA1/SELP/F2/F2R/PRKG1/BLOC1S4/PEAR1/BLOC1S3/PPIA/FLNA/SRC/MFSD2B/HBB/LYN/ITGB3/ADRA2B/DGKK	70	0.526316
GO:0051592	BP	GO:0051592	response to calcium ion	76/6492	147/18903	1.06308e-05	0.000449483	0.000338709	SLC25A13/SYT7/DPEP1/SYT13/HSPA5/GUCA1A/MEF2A/RASGRP2/MEF2C/ITPKC/ADD1/P2RX7/ITPR3/CPNE6/EEF2K/RASA4/CAV1/PPIF/CCND1/ECT2/SLC25A12/TNNT2/CASQ2/PKD2/SLC25A23/FOSB/SYT5/JUND/SYT11/TSHB/THBS1/ITPKA/CARF/TRPC3/MTTP/IQGAP1/TRPM2/ITPKB/CPNE9/TRPC1/CAMK2D/CRHBP/KCNMB1/KCNMA1/KCNB1/ALOX15/PRKAA2/NCSTN/INHBB/TRPV6/AQP3/STIM1/CLIC4/NLGN1/FOS/KCNMB3/JUNB/NEUROD2/FGG/FGA/FGB/SYT12/JUN/CPNE7/PENK/CPNE4/ENTPD6/…	76	0.517007
GO:0061337	BP	GO:0061337	cardiac conduction	56/6492	101/18903	1.07178e-05	0.000450218	0.000339264	EHD3/ATP1A2/DSG2/KCNH2/PKP2/ATP2B4/ATP2B3/MEF2A/ABCC9/ATP2A3/KCNN2/TBX5/HCN2/SLC8A3/ATP1A3/SCN1B/CAV1/TBX18/PDE4D/NUP155/TNNI3K/SLC8A2/CASQ2/ATP1B2/KCNA5/HRC/TRPM4/DSC2/BIN1/HCN4/HCN3/TRPC1/CORIN/CAMK2D/ANK2/SCN2B/CACNA1C/KCNE4/CACNA2D1/CXADR/RNF207/SPTBN4/KCNJ3/CACNB2/SCN3B/KCND3/KCNH6/SCN4B/GJC1/SLC8A1/NKX2-5/CTNNA3/FLNA/PLN/RYR2/CALM1	56	0.554455
GO:0051146	BP	GO:0051146	striated muscle cell differentiation	136/6492	293/18903	1.12495e-05	0.000469503	0.000353795	SPAG9/IGF1/PLEKHO1/EHD2/MYOM2/CDON/HDAC4/MEF2A/ATP11A/RARB/SIRT6/ACTN2/MEF2C/TBX5/SIX4/ASB2/NFATC2/MYL9/DMPK/TNNT1/DYRK1B/CEACAM5/EZH2/PPP3CB/BMPR1A/DKK1/KAT2A/CNTNAP1/HDAC5/PRKAR1A/MYH3/IFT20/CD81/SOX6/RBM24/BVES/SRF/TBX18/FOXP1/TANC1/IGFBP5/RGS2/ACADM/PROX1/TNNT2/ADRA1A/POPDC2/LDB3/NLN/BMP2/SIX1/FLNC/TMOD2/MYOD1/PARP2/RARA/POPDC3/KDM6B/RBM38/MYH11/MYO18B/SORT1/FHOD3/PDGFRA/HEY2/ALPK3/TMOD1/MYOF…	136	0.464164
GO:0051260	BP	GO:0051260	protein homooligomerization	94/6492	190/18903	1.13447e-05	0.00047044	0.000354501	EHD3/KCNG1/POLQ/ME1/ACACB/NLRP1/SAMHD1/RS1/PYCARD/TRPA1/GSDMD/KCTD9/KCNA7/COMP/PKD2L1/MPP2/KCTD10/PRMT8/KCNA1/SOD2/ACOT13/C9/ECT2/PKD2/IKZF4/KCNS1/CLYBL/KIF25/PRMT1/TRPV5/STEAP4/RNF112/KCNA5/PXDN/TRPM4/KCNC3/MIP/KCTD3/PNPT1/CRTC3/SAMD1/TRPM2/BCL10/ALDH9A1/AQP10/GLRA3/SIGMAR1/ALAD/NACC2/ROM1/MAT1A/KCTD14/TDO2/KCTD15/GBP5/KCTD18/KCNS2/KCNB1/SHKBP1/CRTC2/KCNV1/HPRT1/AQP2/TK1/KCTD5/SCARA5/KCNS3/KCNG3…	94	0.494737
GO:0045103	BP	GO:0045103	intermediate filament-based process	51/6492	90/18903	1.15425e-05	0.000475595	0.000358386	KRT33A/VIM/PKP2/PKP1/KRT31/KRT23/KRT37/KRT18/CSNK1A1/PPL/MACF1/KRT34/KRT33B/NES/PRPH/KRT85/KRT7/KRT71/INA/DST/TCHH/SYNC/SHH/NDEL1/KRT8/KRT78/KRT86/KRT75/KRT6C/KRT74/KRT83/KRT38/KRT13/KRT9/KRT20/DES/FAM83H/SYNM/CLN8/KRT6B/KRT79/KRT3/KRT16/KRT14/KRT77/KRT39/KRT40/KRT6A/KRT81/EPPK1/NEFL	51	0.566667
GO:0072507	BP	GO:0072507	divalent inorganic cation homeostasis	161/6492	356/18903	1.16912e-05	0.000478672	0.000360705	CX3CL1/TFAP2B/ATP2C1/SLC11A1/ATP1A2/BAK1/MCUR1/CYBA/MCOLN3/ATP2B4/ATP2C2/ATP2B3/ATP2A3/SNX10/BAX/FKBP1A/P2RX7/SLC8B1/JPH4/ITPR3/ABL1/SLC8A3/BDKRB1/HTR2A/CEMIP/SLC30A4/TRPA1/CALB1/SLC39A14/DMPK/ATP13A1/CAV1/ZNHIT1/CXCL12/P2RX1/CCL7/WFS1/TCIRG1/CYP27B1/KCNA1/PTPN6/SLC39A7/PDE4D/SLC30A3/ATP6V1B1/SLC8A2/CASQ2/PKD2/CNNM1/TNFSF11/TRIM24/MT1G/SLC25A23/WNK4/ATP13A4/TRPV5/KDR/TNNI3/HRC/RGN/TRPC4/TPT1/TMEM…	161	0.452247
GO:0051208	BP	GO:0051208	sequestering of calcium ion	69/6492	131/18903	1.18372e-05	0.000481605	0.000362915	CX3CL1/ATP1A2/CYBA/MCOLN3/BAX/FKBP1A/P2RX7/SLC8B1/JPH4/ITPR3/ABL1/BDKRB1/HTR2A/CEMIP/TRPA1/PTPN6/PDE4D/CASQ2/PKD2/SLC25A23/HRC/HTR2B/LHCGR/FGF2/CXCL9/METTL21C/TRPM2/XCL1/TRPC1/SNCA/CAMK2D/ANK2/HTR2C/JPH2/ITPR1/CACNA1C/AKAP6/JPH3/UBASH3B/CLIC2/GPER1/HSP90B1/JSRP1/IL13/CXCL10/CXCL11/PRKCE/CHD7/P2RY6/CCL19/HAP1/CD19/CALR/F2/F2R/SLC8A1/PRKD1/RASA3/FLNA/ANXA6/PLN/RYR2/CALM1/RYR3/DMD/LIME1/GSTM2/LYN/IT…	69	0.526718
GO:0032412	BP	GO:0032412	regulation of ion transmembrane transporter activity	131/6492	281/18903	1.23987e-05	0.000501295	0.000377753	HECW1/ABCC8/MAPK8IP2/EHD3/ATP1A2/FHL1/KCNG1/RASGRF1/WNK1/SPHK2/CACNB1/ABCC9/GAL/GNB5/CACNG4/ACTN2/MEF2C/ABCB1/REM1/FKBP1A/JPH4/TREM2/HCN2/MMP9/SCN1B/CAV1/PPP3CB/PPIF/CCL2/KCNA1/IFNG/PDE4D/CASQ2/PKD2/PPP3CC/KCNS1/AHNAK/OPRL1/WNK4/HSPA2/ATP1B2/FGF13/EPO/HRC/RGN/CHRM3/EPHB2/GRP/MTNR1B/TACO1/TRPC6/FXYD6/COX17/HCN4/HCN3/OSR1/STAC/CAMK2D/ANK2/CRHBP/CRH/STOM/SCN2B/JPH2/ITGB1/FXYD4/ADRA2A/AKAP6/EDNRA/KCN…	131	0.466192
GO:0016055	BP	GO:0016055	Wnt signaling pathway	200/6492	456/18903	1.26574e-05	0.000508104	0.000382884	WNT16/HECW1/ITGA3/CELSR3/PKD1/MKS1/CALCOCO1/WWTR1/ZRANB1/MYOC/DEPDC1B/CUL3/DKK3/WNK1/PTPRU/CDH3/DLX3/ASPM/IFT80/LRP6/FGF10/FBXW11/NLE1/FERMT2/WNT8B/JADE1/CYLD/NLK/ABL1/DAAM1/NFATC4/GID8/SPEF1/RSPO4/FERMT1/TBL1X/FGF9/SALL1/SFRP1/TLE6/CCNE1/PLEKHA4/HBP1/DLX5/CAV1/WNT2/GRB10/TLE4/KANK1/GATA3/DKK1/WNT3/IFT20/NFKB1/CPE/CCND1/FOLR1/MDK/GLI1/MDFI/PTK7/TBX18/CSNK1A1/AMOTL2/IGFBP2/USP34/WNT6/VAX2/MAD2L2/W…	200	0.438596
GO:0048754	BP	GO:0048754	branching morphogenesis of an epithelial tube	80/6492	157/18903	1.27242e-05	0.000508104	0.000382884	SOX8/PKD1/MKS1/TIE1/FGF10/GLI2/PAX2/SIRT6/PGR/ESR1/ABL1/LRP5L/SIX4/NFATC4/CTSZ/LAMA1/ESRP2/FOXF1/SALL1/EYA1/MET/WNT2/FGF8/AREG/MDK/TIMELESS/SRF/WNT6/TCF21/PKD2/TBX2/SOX9/PAX8/BMP2/SIX1/KDR/WNT2B/SPRY2/NKX2-1/MYC/YAP1/FGF2/PML/GREB1L/SMAD4/EPHA2/SLIT2/SFRP2/ADAMTS16/RSPO2/EDNRA/HS3ST3A1/MMP14/IHH/TGFBR2/SPRY1/HHIP/TBX20/SHH/ILK/DCHS1/GREM1/GBX2/GDNF/AR/CLIC4/SEMA3E/BCL2/PPP1CA/CTNNBIP1/MAGED1/WT1/…	80	0.509554
GO:0071103	BP	GO:0071103	DNA conformation change	58/6492	106/18903	1.2929e-05	0.000513115	0.000386659	DDX11/HMGB3/RFC2/RAD51/POLQ/MCM2/MCM6/ATRX/RAD54L/CDC45/ABL1/TOP3B/MCM5/ASCC2/GINS1/MCM4/ERCC2/SETX/RECQL5/RFC5/MCM3/CHD5/WRNIP1/DTD1/MCM8/CHTF18/MTERF1/GINS2/TOP2A/RFC3/ANXA1/BRIP1/DSCC1/HMGA1/DNA2/PIF1/DQX1/GINS4/CHD1/RECQL4/HFM1/RFC4/HMGB2/MCM7/CHD7/CHD2/RUVBL1/CHD9/TOP3A/MCMDC2/GINS3/RUVBL2/TOP1MT/PURA/ERCC6L/RAD54B/BLM/DDX3X	58	0.54717
GO:0055074	BP	GO:0055074	calcium ion homeostasis	142/6492	309/18903	1.38571e-05	0.000546595	0.000411889	CX3CL1/TFAP2B/ATP2C1/ATP1A2/BAK1/MCUR1/CYBA/MCOLN3/ATP2B4/ATP2C2/ATP2B3/ATP2A3/SNX10/BAX/FKBP1A/P2RX7/SLC8B1/JPH4/ITPR3/ABL1/SLC8A3/BDKRB1/HTR2A/CEMIP/TRPA1/CALB1/DMPK/ATP13A1/CAV1/ZNHIT1/CXCL12/P2RX1/CCL7/WFS1/TCIRG1/CYP27B1/PTPN6/PDE4D/ATP6V1B1/SLC8A2/CASQ2/PKD2/TNFSF11/TRIM24/SLC25A23/WNK4/ATP13A4/TRPV5/KDR/TNNI3/HRC/RGN/TRPC4/TPT1/TMEM165/HTR1B/HTR2B/TRPC6/LHCGR/FGF2/TRPC3/CXCL9/METTL21C/SLC2…	142	0.459547
GO:0021953	BP	GO:0021953	central nervous system neuron differentiation	87/6492	174/18903	1.41124e-05	0.000553293	0.000416936	ARX/MYCBP2/PAFAH1B1/DMRT3/RORA/GLI2/OPHN1/LHX5/CBLN1/HERC1/SCN1B/OGDH/LHX6/LHX3/BMPR1A/NR2E1/HES1/PLXNA1/DLX2/EPHA4/CHD5/PROX1/NRP2/LHX4/INHBA/SOX4/NKX2-2/ZSWIM6/MNX1/PLXNA3/DCLK1/EPHB2/FAIM2/EMX1/NKX2-1/TBR1/LBX1/BMPR1B/FOXN4/DLX1/SLIT2/ABT1/NFIB/POU4F1/NR4A2/WNT7A/EPHB1/B4GALT5/BTG2/ISL2/ARHGAP35/SPTBN4/CHRNB2/DRAXIN/LMX1A/NKX6-1/TBX20/SHH/CDK5/GBX1/ATP7A/HPRT1/NDEL1/GBX2/RAC3/SEMA3E/DCLK2/OTP/…	87	0.5
GO:0070252	BP	GO:0070252	actin-mediated cell contraction	57/6492	104/18903	1.43221e-05	0.000558132	0.000420582	ATP1A2/DSG2/KCNH2/PKP2/ROCK1/ABCC9/KCNN2/EPDR1/MYL6/MYLK2/SNTA1/SCN1B/CAV1/ACTA2/MYH3/PDE4D/NUP155/TNNC1/TNNT2/KCNJ8/MYH2/VIL1/FGF13/KCNA5/TRPM4/DSC2/BIN1/HCN4/FRMD6/TPM1/CAMK2D/ANK2/GSN/SCN2B/CACNA1C/KCNE4/GPD1L/CACNA2D1/RNF207/STC1/ACTC1/KCNJ3/ADORA1/CACNB2/SCN3B/SGCD/KCND3/SCN4B/GJC1/CTNNA3/PDE4B/MYL6B/FLNA/PARVA/PLN/RYR2/MYH4	57	0.548077
GO:0048762	BP	GO:0048762	mesenchymal cell differentiation	119/6492	252/18903	1.46301e-05	0.00056236	0.000423768	SEMA3F/WNT16/SOX8/SEMA3G/IGF1/WWTR1/PHLDB1/HGF/ZFP64/CUL7/EPHA3/KITLG/ROCK1/TGFBR3/LRP6/FGF10/TCOF1/FERMT2/CLASP1/SEMA3A/PAX2/FGFR1/MEF2C/TBX5/SEMA4G/FAM83D/SMAD7/RGCC/SFRP1/HPN/WNT2/EZH2/AKNA/GATA3/BMPR1A/FGF8/FOLR1/MDK/CORO1C/BMP5/FAM172A/HES1/STAT1/EPHA4/MAD2L2/NRP2/TCF21/TGFB3/GLIPR2/SNAI1/SOX9/POLR1B/FOXA2/BMP2/SIX1/OLFM1/GATA5/TRIM28/LOXL2/ROCK2/HEY2/SEMA4F/HTR2B/SPRY2/EDNRB/IL6/NKX2-1/DAB2…	119	0.472222
GO:0051235	BP	GO:0051235	maintenance of location	155/6492	342/18903	1.46377e-05	0.00056236	0.000423768	CIAPIN1/CX3CL1/PAFAH1B1/CRY1/PKD1/ATP1A2/TMSB10/HSPA5/VPS13D/LTBP1/CYBA/MCOLN3/DGAT2/ASPM/SREBF1/SCARB1/ACACB/BAX/FKBP1A/P2RX7/SLC8B1/JPH4/TREM2/ITPR3/SIRT1/ABL1/KDELR3/RANGAP1/BDKRB1/NFKBIA/CDS2/HTR2A/ARL2BP/CEMIP/SLC30A4/TRPA1/SQLE/NFKBIB/KDELR1/PLA2G4C/GRIK5/CAV1/PLOD3/NFKB1/PTPN6/MDFI/PDE4D/SLC30A3/AUP1/APOA1/CASQ2/PKD2/CRY2/GPSM2/SRGN/SLC25A23/C3/VPS13C/HRC/SYNE1/FTHL17/CRP/ANGPTL3/DZIP1/ANX…	155	0.453216
GO:0051282	BP	GO:0051282	regulation of sequestering of calcium ion	67/6492	127/18903	1.46914e-05	0.00056236	0.000423768	CX3CL1/ATP1A2/CYBA/MCOLN3/BAX/FKBP1A/P2RX7/SLC8B1/JPH4/ITPR3/ABL1/BDKRB1/HTR2A/CEMIP/TRPA1/PTPN6/PDE4D/CASQ2/PKD2/SLC25A23/HRC/HTR2B/LHCGR/FGF2/CXCL9/METTL21C/TRPM2/XCL1/TRPC1/SNCA/CAMK2D/ANK2/HTR2C/JPH2/ITPR1/CACNA1C/AKAP6/JPH3/UBASH3B/CLIC2/GPER1/JSRP1/IL13/CXCL10/CXCL11/PRKCE/CHD7/P2RY6/CCL19/HAP1/CD19/F2/F2R/SLC8A1/PRKD1/RASA3/FLNA/ANXA6/PLN/RYR2/CALM1/RYR3/DMD/LIME1/GSTM2/LYN/ITGB3	67	0.527559
GO:0001701	BP	GO:0001701	in utero embryonic development	175/6492	393/18903	1.52161e-05	0.000573123	0.000431879	SOX8/PKD1/APBA3/PSMC4/IGF1/APBA2/CUL3/NSUN2/C6/RCN1/PRDM1/EPN1/TIE1/ATP11A/POLB/NLE1/CAMSAP3/PALB2/GRHL2/NCOA1/TMED2/CNOT3/MSH2/SMARCB1/MFNG/PDGFB/GINS1/SALL4/HM13/CELF4/GATA1/FOXF1/ERCC2/ASF1B/ELL/SMG9/WNT2/PLOD3/C5/APBA1/ZFAND5/GATA3/BMPR1A/SH3PXD2A/B9D1/KAT2A/BMP5/MDFI/TFEB/BYSL/SRF/HAND1/HES1/MFN2/NEK2/PKD2/PPP4R4/TGFB3/OCRL/NECAB1/STIL/SNAI1/BMP2/EIF2S2/PRMT1/SBDS/EMG1/KLF2/LIF/SPECC1/E2F8/S…	175	0.445293
GO:0021761	BP	GO:0021761	limbic system development	60/6492	111/18903	1.52843e-05	0.000573123	0.000431879	PAFAH1B1/ATP1A2/UBA6/PHLPP2/ATP2B4/BAX/LHX5/OGDH/EZH2/EZH1/MDK/KCNA1/NR2E1/SRF/PLXNA1/RAB3GAP1/DLX2/PROX1/KIF14/NRP2/BBS2/FGF13/MAS1/PLXNA3/RARA/BCAN/RAX/NKX2-1/TBR1/ATAT1/DLX1/TMEM108/EPHA5/SRD5A1/FEZ1/KIRREL3/ZIC1/LRP8/BTG2/ARPC5/LMX1A/CDK5/SEMA6B/SEMA3E/DCLK2/CDK5R2/OTP/PTEN/FOXB1/ID4/NDNF/HAP1/CNTNAP2/CDK5R1/NHLH2/ALDH1A3/RELN/HSD3B1/NEFL/SRD5A2	60	0.540541
GO:0009314	BP	GO:0009314	response to radiation	198/6492	452/18903	1.53141e-05	0.000573123	0.000431879	KDM1A/FBXL3/ABCC8/CRY1/BRCA1/ATP1A2/BAK1/USP2/PNKP/HSPA5/GUCA1A/PER3/RAD51/CYBA/OPN3/PRDM1/POLD1/TMEM161A/ABCA7/BCL3/GNB5/POLB/CNGB1/PTGS2/TIPIN/SIRT6/SLC1A3/DCT/RAD54L/BAX/MMP2/MYO15A/MSH2/SIRT1/CIRBP/NFATC4/MMP9/ACTR5/CACNA1F/RS1/BMF/RP1/EYA1/SFRP1/ADAM2/ERCC2/BRAT1/GATA3/CXCL12/RGS9/CCL7/RCVRN/IFT20/UNC119/MAPK10/CRYAB/CCND1/RAD51AP1/SOD2/ECT2/HYAL1/IL1A/TANC1/ITGB6/REEP6/ID2/GADD45A/KMT2A/CCN…	198	0.438053
GO:0033047	BP	GO:0033047	regulation of mitotic sister chromatid segregation	35/6492	56/18903	1.53761e-05	0.000573123	0.000431879	MAD1L1/SPDL1/TRIP13/NDC80/BIRC5/FBXO5/TTK/KAT2B/MAD2L2/CDC20/CENPF/DUSP1/ZWINT/XRCC3/CCNB1/CDCA8/APC/NUF2/ATM/INCENP/SPC25/BUB3/BUB1B/SPC24/MAD2L1/PTTG1/PRAP1/PLK1/CDT1/BUB1/ZWILCH/GEN1/AURKB/KNTC1/LCMT1	35	0.625
GO:0048511	BP	GO:0048511	rhythmic process	139/6492	302/18903	1.54156e-05	0.000573123	0.000431879	MYCBP2/FBXL3/NOS2/CRY1/USP2/HSPA5/PER3/OPN3/PTPRN/RORA/SREBF1/FBXW11/SIRT6/PGR/MMP2/ESR1/TYRO3/CREM/SIRT1/HNF4A/AHCY/SUV39H1/AMH/NAMPT/GHRHR/CASP2/EZH2/SETX/PTGDS/HLF/MAPK10/PPARGC1A/MDK/TIMELESS/KAT2B/ID2/PROX1/KMT2A/FOXO3/KLF9/TGFB3/ENOX1/EGR1/CRY2/CBX3/INHBA/TNFAIP6/EREG/OPRL1/TPH1/JUND/TOP2A/NR0B2/PER2/MYBBP1A/SERPINF1/PCNA/BHLHE40/ROCK2/MTNR1B/CLOCK/PDGFRA/CGA/FBXL8/NKX2-1/NR5A1/LHCGR/CYP1B1…	139	0.460265
GO:1904427	BP	GO:1904427	positive regulation of calcium ion transmembrane transport	52/6492	93/18903	1.59088e-05	0.00058808	0.000443149	CALCR/CX3CL1/EHD3/BAK1/ADCYAP1R1/BAX/P2RX7/ABL1/BDKRB1/CEMIP/CAV1/PPP3CB/P2RX1/PKD2/PPP3CC/RAMP3/PLP1/HSPA2/RGN/P2RX4/LHCGR/TRPC3/CXCL9/XCL1/STAC/TRPC1/SNCA/ANK2/JPH2/AKAP6/CACNA2D1/G6PD/GPER1/CDK5/CACNB2/STIM1/CACNB3/IL13/CXCL10/CXCL11/P2RY6/HAP1/GRIN1/CD19/F2/F2R/CACNB4/STAC3/RYR2/CALM1/GJC2/GSTM2	52	0.55914
GO:0043523	BP	GO:0043523	regulation of neuron apoptotic process	105/6492	218/18903	1.60352e-05	0.000589386	0.000444134	CX3CL1/TFAP2B/GCLM/ERBB3/ROCK1/SNCB/MEF2C/BAX/TYRO3/MSH2/TREM2/JAK2/ABL1/CDC34/HMOX1/SIX4/NFATC4/MYBL2/TOX3/MAG/GRIK5/CASP2/GATA3/UNC5B/FGF8/PITX3/CCL2/WFS1/TRIM2/PPARGC1A/CCND1/MDK/SOD2/NR3C1/CPEB4/LANCL1/KIF14/FOXO3/TGFB3/GRM4/SIX1/KDR/NES/VSTM2L/CASP9/NGF/IL6ST/MTNR1B/EPHA7/AGAP2/FAIM2/STXBP1/TFAP2A/HDGF/MCL1/DLX1/SNCA/SIGMAR1/ATM/HYOU1/ADAM8/POU4F1/BCL2L11/NR4A2/ANGPT1/KCNB1/PINK1/BTG2/G6PD/D…	105	0.481651
GO:0051216	BP	GO:0051216	cartilage development	98/6492	201/18903	1.61843e-05	0.000591505	0.00044573	PKD1/COL11A1/IFT80/PITX1/EVC/RARB/MEF2C/EPYC/PTHLH/SMAD7/FGF9/TRPS1/SLC39A14/COMP/OGN/BMPR1A/KAT2A/NKX3-2/ZBTB16/MDK/SOX6/FGF6/MGP/BMP5/SRF/GHR/HAND1/HYAL1/EFEMP1/DLX2/MEF2D/BMP8B/HOXB3/SNX19/TGFBI/SNAI1/RUNX2/BBS2/SOX9/BMP2/THRA/RARA/CHSY1/MATN3/CHI3L1/LOXL2/WNT2B/SOX5/ADAMTS7/SULF1/MMP13/FGF2/BMPR1B/COL2A1/ACVRL1/ECM1/WNT9A/OSR1/SFRP2/RSPO2/NFIB/ZEB1/SERPINH1/HMGA2/ADAMTS12/WNT7A/FGF18/STC1/CBS…	98	0.487562
GO:0051283	BP	GO:0051283	negative regulation of sequestering of calcium ion	66/6492	125/18903	1.6366e-05	0.000594785	0.000448203	CX3CL1/ATP1A2/CYBA/MCOLN3/BAX/FKBP1A/P2RX7/SLC8B1/JPH4/ITPR3/ABL1/BDKRB1/HTR2A/CEMIP/TRPA1/PTPN6/PDE4D/CASQ2/PKD2/HRC/HTR2B/LHCGR/FGF2/CXCL9/METTL21C/TRPM2/XCL1/TRPC1/SNCA/CAMK2D/ANK2/HTR2C/JPH2/ITPR1/CACNA1C/AKAP6/JPH3/UBASH3B/CLIC2/GPER1/JSRP1/IL13/CXCL10/CXCL11/PRKCE/CHD7/P2RY6/CCL19/HAP1/CD19/F2/F2R/SLC8A1/PRKD1/RASA3/FLNA/ANXA6/PLN/RYR2/CALM1/RYR3/DMD/LIME1/GSTM2/LYN/ITGB3	66	0.528
GO:0003158	BP	GO:0003158	endothelium development	72/6492	139/18903	1.64784e-05	0.000595522	0.000448758	VCL/FOXJ2/TIE1/ROCK1/RAPGEF3/ADD1/EZR/PPP1R16B/TJP1/MET/HOXA13/PLOD3/PDE4D/PDCD10/ACVR2B/ARHGEF26/FOXP1/PROC/RAP1A/PROX1/HOXB5/CXCR4/KDR/BARX1/KDM6B/HAPLN2/STARD13/BTG1/ROCK2/HEY2/EDNRB/VEZF1/ACVRL1/SMAD4/RHOB/ZEB1/ADAMTS12/EDNRA/ROBO4/XDH/F11R/STC1/SCUBE1/CLDN1/FSTL1/HEY1/SOX17/CLDN3/TMEM100/MESP1/CXCL10/COL22A1/CLIC4/FASN/S1PR1/HEG1/CD34/APOLD1/CDH5/MYADM/FZD2/PLCB1/COL18A1/CLDN5/PDE2A/GJA4/BMP…	72	0.517986
GO:0048645	BP	GO:0048645	animal organ formation	41/6492	69/18903	1.74915e-05	0.000628624	0.000473702	MKS1/FGF10/TP63/PAX2/MEF2C/LRP2/SMARCD3/TBX5/EYA1/WNT2/BMPR1A/FGF8/DKK1/NKX3-2/FOLR1/HES1/HOXC11/PAX8/BMP2/SIX1/GATA5/WNT2B/TBR1/PIM1/SULF1/FGF2/GATA6/FOXH1/LEMD2/TGFBR2/SPRY1/HAND2/CITED2/SHH/SOX17/MESP1/GDNF/AR/GNG5/WT1/RBM20	41	0.594203
GO:0198738	BP	GO:0198738	cell-cell signaling by wnt	200/6492	458/18903	1.7597e-05	0.000628924	0.000473928	WNT16/HECW1/ITGA3/CELSR3/PKD1/MKS1/CALCOCO1/WWTR1/ZRANB1/MYOC/DEPDC1B/CUL3/DKK3/WNK1/PTPRU/CDH3/DLX3/ASPM/IFT80/LRP6/FGF10/FBXW11/NLE1/FERMT2/WNT8B/JADE1/CYLD/NLK/ABL1/DAAM1/NFATC4/GID8/SPEF1/RSPO4/FERMT1/TBL1X/FGF9/SALL1/SFRP1/TLE6/CCNE1/PLEKHA4/HBP1/DLX5/CAV1/WNT2/GRB10/TLE4/KANK1/GATA3/DKK1/WNT3/IFT20/NFKB1/CPE/CCND1/FOLR1/MDK/GLI1/MDFI/PTK7/TBX18/CSNK1A1/AMOTL2/IGFBP2/USP34/WNT6/VAX2/MAD2L2/W…	200	0.436681
GO:0010639	BP	GO:0010639	negative regulation of organelle organization	164/6492	366/18903	1.83017e-05	0.000650515	0.000490198	MAD1L1/FKBP4/BRCA1/IGF1/HGF/BAK1/TMSB10/MYOC/SPDL1/CAPG/ARHGAP6/MAP4/CTNNA2/NAV3/PFN2/SPTB/SMG6/RPS6KA2/TRIP13/TFRC/MCM2/CLASP1/ADD2/CAMSAP3/NDC80/ATRX/ADD1/TPX2/ARHGAP28/BIRC5/PICK1/SPEF1/NAA10/CORO2B/TJP1/CLIP3/MET/KANK1/PPIF/KAT2A/MDM1/FBXO5/TTK/KAT2B/SPTBN1/MAD2L2/CDC20/STMN1/CENPF/DUSP1/CLU/ODF2L/ZWINT/XRCC3/VIL1/STYXL1/LIF/CGNL1/TMOD2/TTBK2/BCL2L2/FGF13/HIP1R/MAP1B/TOP2A/SLX1A/KANK4/SWAP70/…	164	0.448087
GO:0048806	BP	GO:0048806	genitalia development	30/6492	46/18903	1.86138e-05	0.000657991	0.000495831	PKD1/BAK1/ASB1/FGF10/TP63/LRP2/BAX/ESR1/TYRO3/HOXA13/FGF8/BMP5/DHCR24/HSD17B3/PDGFRA/STRA6/LHCGR/GREB1L/SRD5A1/KLHL10/SHH/AXL/ROR2/AR/CHD7/PTPN11/WT1/SYCP2/LHX1/SRD5A2	30	0.652174
GO:0044786	BP	GO:0044786	cell cycle DNA replication	28/6492	42/18903	1.9116e-05	0.000672074	0.000506443	DBF4/RAD51/MCM2/TIPIN/MCM6/ATRX/CDC45/CDC7/GINS1/MCM4/LIG1/FBXO5/MCM3/GMNN/BCL6/E2F8/PCNA/DNA2/BRCA2/DONSON/DBF4B/E2F7/CDT1/FEN1/ATAD5/GINS3/BLM/DACH1	28	0.666667
GO:0045104	BP	GO:0045104	intermediate filament cytoskeleton organization	50/6492	89/18903	1.93254e-05	0.000675763	0.000509223	KRT33A/VIM/PKP2/PKP1/KRT31/KRT23/KRT37/KRT18/CSNK1A1/PPL/MACF1/KRT34/KRT33B/NES/PRPH/KRT85/KRT7/KRT71/INA/DST/TCHH/SHH/NDEL1/KRT8/KRT78/KRT86/KRT75/KRT6C/KRT74/KRT83/KRT38/KRT13/KRT9/KRT20/DES/FAM83H/SYNM/CLN8/KRT6B/KRT79/KRT3/KRT16/KRT14/KRT77/KRT39/KRT40/KRT6A/KRT81/EPPK1/NEFL	50	0.561798
GO:0051304	BP	GO:0051304	chromosome separation	70/6492	135/18903	2.0517e-05	0.000711626	0.000536249	MAD1L1/DPF1/TACC3/CUL3/SPDL1/SMARCD1/TRIP13/ACTB/SMARCA2/NDC80/SMARCD3/BIRC5/CDC6/SMARCB1/RECQL5/SMARCD2/NCAPG/FBXO5/TTK/SMC4/MAD2L2/CDC20/CENPF/DUSP1/NCAPH/ZWINT/XRCC3/DLGAP5/SMARCA4/PHF10/TOP2A/CCNB1/CDCA8/APC/ESPL1/ACTL6A/SMC2/CENPE/ANAPC11/NUF2/NCAPG2/ATM/INCENP/SPC25/BUB3/EME1/BUB1B/M1AP/ANKLE1/SPC24/MEIOB/HFM1/MAD2L1/PTTG1/PRAP1/PLK1/CDT1/BUB1/ZWILCH/UBE2C/TOP3A/GEN1/RMI1/AURKB/MAPK15/KNTC1…	70	0.518519
GO:0072170	BP	GO:0072170	metanephric tubule development	18/6492	23/18903	2.06811e-05	0.000711626	0.000536249	SOX8/PKD1/WWTR1/ACAT1/PAX2/CALB1/HES1/STAT1/PKD2/SOX9/PAX8/LIF/YAP1/OSR1/CXCR2/HES5/POU3F3/AQP1	18	0.782609
GO:0072243	BP	GO:0072243	metanephric nephron epithelium development	18/6492	23/18903	2.06811e-05	0.000711626	0.000536249	SOX8/PKD1/WWTR1/ACAT1/PAX2/CALB1/HES1/STAT1/PKD2/SOX9/PAX8/LIF/YAP1/OSR1/LAMB2/HES5/POU3F3/AQP1	18	0.782609
GO:0044089	BP	GO:0044089	positive regulation of cellular component biogenesis	215/6492	498/18903	2.1243e-05	0.000723525	0.000545215	ZMYND10/DHX33/CX3CL1/ANLN/BID/PHLDB1/BAK1/MYOC/FNIP2/NCKAP1/NAV3/ROCK1/PFN2/TFRC/FERMT2/CLASP1/FSCN1/SPAG5/CDH17/RAPGEF3/COL16A1/BAX/P2RX7/TBX5/ESR1/MYO3A/ABL1/CDC34/PALM/PLEK2/TCL1A/FERMT1/RGCC/CBLN1/HAS3/EEF2K/PYCARD/BMF/RP1/SFRP1/ARHGEF10/PIH1D1/MED25/CAV1/MET/LIMK1/NEURL1/GIT1/CSF3/IFT20/SLAIN2/IFNG/IL17A/SRF/DPYSL3/HRG/HYAL1/SNX4/TACR1/RAB3GAP1/WRAP73/APOA1/TGFB3/RHOQ/TEK/CLU/SORBS3/SLITRK3/…	215	0.431727
GO:0007015	BP	GO:0007015	actin filament organization	198/6492	454/18903	2.12505e-05	0.000723525	0.000545215	CX3CL1/GAS7/TMSB10/MYOC/CUL3/CAPG/ARHGAP6/ELN/CYFIP2/NCKAP1/CTNNA2/ROCK1/PFN2/SPTB/ACTN1/FERMT2/CLASP1/ADD2/FSCN1/ACTN2/RAPGEF3/ADD1/ARHGAP28/MYO15A/EZR/SORBS1/JAK2/ABL1/SH3BP1/PICK1/RGCC/ELMO3/PYCARD/CORO2B/TJP1/SFRP1/ARHGEF10/TLE6/PIK3R2/MET/FSCN3/LIMK1/KANK1/CXCL12/CSF3/RND2/CORO1C/ARPC3/NEDD9/PHACTR1/WASF1/SRF/DPYSL3/SPTBN1/TACR1/WIPF1/RND3/MAD2L2/STMN1/PROX1/APOA1/KPTN/TNNT2/TGFB3/SORBS3/CAL…	198	0.436123
GO:0019932	BP	GO:0019932	second-messenger-mediated signaling	143/6492	314/18903	2.28426e-05	0.000772031	0.000581767	PDK2/NOS2/SELE/PTBP1/CD22/IGF1/ATP1A2/GUCA2B/GUCA1A/HOMER3/ATP2B4/ERBB3/INPP5A/GAL/LMCD1/NFATC3/ADCY2/ADCYAP1R1/RAPGEF3/SCTR/P2RX7/TREM2/ITPR3/CDC34/RASD2/NFATC4/NFATC2/NCALD/DMPK/GRIN2D/GHRHR/PPP3CB/RUNDC3A/RASD1/GLP1R/CAP2/CCR6/PDE4D/PEX5L/CCL20/ZAP70/NR5A2/RCAN3/SLC8A2/CASQ2/TNFSF11/PPP3CC/CXCR4/PTGFR/SOX9/OPRL1/DYRK2/GNAI1/KDR/ACKR4/TNNI3/HRC/TRPM4/RGN/NFATC1/GUCY2D/CHRM3/MTNR1B/P2RX4/HTR2B/E…	143	0.455414
GO:0003206	BP	GO:0003206	cardiac chamber morphogenesis	66/6492	126/18903	2.29139e-05	0.000772031	0.000581767	MKS1/PKP2/COL11A1/TGFBR3/MEF2C/LRP2/SMARCD3/GRHL2/FKBP1A/TBX5/SMAD7/FOXF1/PPP1R13L/DNAH11/WNT2/GATA3/BMPR1A/FGF8/CPE/BMP5/SRF/HAND1/HES1/TNNC1/PROX1/TNNT2/NRP2/TEK/TBX2/SOX4/BMP2/TNNI3/NOTCH2/HEY2/MDM2/TPM1/GATA6/SMAD4/SLIT2/SFRP2/EDNRA/POU4F1/ADAMTS1/TNNI1/MYL3/FOXH1/TGFBR2/HAND2/CITED2/TBX20/HEY1/NOS3/MESP1/SHOX2/ZFPM2/CHD7/HEG1/SOX11/ZFPM1/FZD2/NKX2-5/TBX1/SLIT3/PARVA/RYR2/BMPR2	66	0.52381
GO:0043410	BP	GO:0043410	positive regulation of MAPK cascade	214/6492	496/18903	2.32854e-05	0.000773663	0.000582997	WNT16/CALCR/DHX33/CX3CL1/SPAG9/MAPK8IP2/IGF1/HGF/MAP2K3/KITLG/TRAF1/CDON/ABCA7/PRKCZ/ROCK1/FGF10/EPHA8/FERMT2/MYDGF/SEMA3A/TRAF4/FGFR1/TP73/MEF2C/TRAF5/P2RX7/TREM2/JAK2/ABL1/GADD45B/PDGFB/BIRC7/RASSF2/HTR2A/PYCARD/RIPK2/FGF21/EZH2/ACTA2/FGF8/DKK1/CCL7/CCL2/CD81/LTBR/IL26/TPD52L1/SASH1/DUSP22/GHR/WWC1/PDCD10/IL1A/CCL20/DNAJC27/EPHA4/RAP1A/LAMTOR2/GADD45A/SLAMF1/MMP8/TGFB3/AVPI1/TEK/TNFSF11/SORBS3/…	214	0.431452
GO:1904064	BP	GO:1904064	positive regulation of cation transmembrane transport	85/6492	171/18903	2.33067e-05	0.000773663	0.000582997	CALCR/ABCC8/CX3CL1/EHD3/BAK1/KCNH2/WNK1/GAL/CACNG4/ACTN2/ADCYAP1R1/BAX/P2RX7/TREM2/ABL1/BDKRB1/CEMIP/CAV1/PPP3CB/P2RX1/CCL2/KCNA1/SLC38A1/IFNG/PKD2/PPP3CC/RAMP3/PLP1/WNK4/HSPA2/ATP1B2/RGN/EPHB2/P2RX4/LHCGR/TRPC3/CXCL9/XCL1/STAC/TRPC1/SNCA/ANK2/KCNMB1/JPH2/AKAP6/EDNRA/CNKSR3/CACNA2D1/RNF207/PINK1/IFNGR2/G6PD/GPER1/CDK5/CACNB2/STIM1/CACNB3/IL13/CXCL10/CXCL11/ADRB2/KCNK3/P2RY6/HAP1/PDZK1/GRIN1/ANO6/…	85	0.497076
GO:0048562	BP	GO:0048562	embryonic organ morphogenesis	135/6492	294/18903	2.33691e-05	0.000773663	0.000582997	WNT16/DLX6/COL11A1/NTN1/FGF10/PAX2/RARB/ITGA8/MEF2C/GRHL2/TMED2/MYO15A/TBX15/MYO3A/SIX4/ASB2/FGF9/FOXF1/CLUAP1/EYA1/MEGF8/HPN/DLX5/GATA3/FGF8/HOXB6/NKX3-2/FOLR1/GLI1/SOBP/MDFI/PTK7/SRF/TBX18/HAND1/HES1/HYAL1/EFEMP1/OTX1/ID2/DLX2/VAX2/ATP6V1B1/KCNQ4/MFAP2/PROX1/TCF21/PKD2/TGFB3/HOXB8/HOXB5/HOXB3/MTHFD1L/TBX2/HOXC11/STIL/RUNX2/SOX9/PAX8/SIX1/EPHB2/NOTCH2/PDGFRA/SPRY2/TFAP2A/MYO7A/YAP1/STRA6/SIX3/LB…	135	0.459184
GO:0086065	BP	GO:0086065	cell communication involved in cardiac conduction	37/6492	61/18903	2.34407e-05	0.000773663	0.000582997	ATP1A2/DSG2/PKP2/KCNN2/TBX5/HCN2/ATP1A3/SCN1B/CAV1/TBX18/PDE4D/NUP155/TNNI3K/CASQ2/ATP1B2/KCNA5/HRC/TRPM4/DSC2/HCN4/HCN3/CAMK2D/ANK2/CACNA1C/CACNA2D1/CXADR/RNF207/KCNJ3/CACNB2/SCN3B/SCN4B/GJC1/SLC8A1/CTNNA3/FLNA/RYR2/CALM1	37	0.606557
GO:1900262	BP	GO:1900262	regulation of DNA-directed DNA polymerase activity	12/6492	13/18903	2.37612e-05	0.000775852	0.000584646	RFC2/GINS1/RFC5/CHTF18/GINS2/PCNA/RFC3/DSCC1/GINS4/RFC4/GINS3/POLG2	12	0.923077
GO:1900264	BP	GO:1900264	positive regulation of DNA-directed DNA polymerase activity	12/6492	13/18903	2.37612e-05	0.000775852	0.000584646	RFC2/GINS1/RFC5/CHTF18/GINS2/PCNA/RFC3/DSCC1/GINS4/RFC4/GINS3/POLG2	12	0.923077
GO:0048705	BP	GO:0048705	skeletal system morphogenesis	108/6492	227/18903	2.38668e-05	0.000775852	0.000584646	PKD1/HOXC8/FOXN3/COL11A1/IFT80/NLE1/RARB/FGFR1/MEF2C/GRHL2/MMP2/P2RX7/TBX15/LRP5L/SIX4/ACP5/EYA1/SFRP1/MEGF8/COMP/DLX5/ZFAND5/FGF8/HOXB6/NKX3-2/SOX6/FGF6/MGP/RAB23/MDFI/GHR/CDX1/HYAL1/ACVR2B/DLX2/MEF2D/TGFB3/HOXB8/HOXB5/HOXB3/MTHFD1L/TBX4/HOXC11/RUNX2/SOX9/TCF15/THRA/SIX1/RARA/CHSY1/SOX5/PDGFRA/CHAD/TFAP2A/MMP13/BMPR1B/FBN2/COL2A1/SLC39A3/SLC39A1/OSR1/CSRNP1/ZEB1/SERPINH1/ARID5B/WNT7A/PPARGC1B/MM…	108	0.475771
GO:0001503	BP	GO:0001503	ossification	188/6492	429/18903	2.41337e-05	0.000780605	0.000588227	SOX8/IGF1/WWTR1/HGF/IBSP/MYOC/GPM6B/COL11A1/CBFB/IFT80/TP63/FERMT2/PTGS2/GLI2/TP53INP2/MEF2C/SNX10/MMP2/PTHLH/P2RX7/CHRD/LRP5L/MMP9/RASSF2/SMAD7/CHRDL1/GATA1/PHEX/FGF9/XYLT1/SFRP1/ERCC2/COMP/DLX5/ATP6V0A4/BMPR1A/MINPP1/DKK1/GIT1/WNT3/AREG/ZBTB16/MDK/TCIRG1/CYP27B1/GLI1/MGP/FBXO5/BMP5/ACVR2B/TACR1/IGFBP5/HSPE1/ATP6V1B1/MEF2D/BMP8B/SPP1/TGFB3/TNN/TNFSF11/CAT/SRGN/EGR2/TNFAIP6/SNAI1/RUNX2/SOX9/BMP2/…	188	0.438228
GO:0030003	BP	GO:0030003	cellular cation homeostasis	215/6492	499/18903	2.47683e-05	0.000797144	0.000600691	CX3CL1/TFAP2B/CYB561/ATP2C1/SLC11A1/ATP1A2/BAK1/CP/MCUR1/CYBA/MCOLN3/ATP2B4/ATP2C2/SLC9A7/ATP2B3/ATP6AP1/CYBRD1/TFRC/ATP2A3/ATP12A/SLC46A1/SLC1A3/BAX/FKBP1A/SLC4A11/P2RX7/SLC8B1/HEPH/SLC26A3/JPH4/SLC22A17/ITPR3/ABL1/HMOX1/SLC8A3/BDKRB1/TM9SF4/HTR2A/CEMIP/SLC30A4/CA2/TRPA1/CALB1/SLC39A14/DMPK/ATP1A3/ATP4A/ATP13A1/ATP6V0A4/CAV1/TFR2/CXCL12/P2RX1/CCL7/WFS1/TCIRG1/IFNG/PTPN6/SLC39A7/SLC4A9/PDE4D/IL1A…	215	0.430862
GO:0032886	BP	GO:0032886	regulation of microtubule-based process	118/6492	252/18903	2.55403e-05	0.000814169	0.00061352	FKBP4/PAFAH1B1/PKD1/BRCA1/TACC3/PHLDB1/EPHA3/NAV3/ROCK1/CLASP1/TACR2/WDR62/SPAG5/CAMSAP3/CYLD/KLHL42/AURKA/TPX2/SIRT1/ABL1/RASSF7/RAE1/SPEF1/EPPIN/CEP76/FSD1/CLIP3/DNAH11/MET/MPDZ/GIT1/KAT2A/SLAIN2/MDM1/CCR6/KAT2B/TACR1/CHMP3/STMN1/KIF18A/GPSM2/STIL/SEMG2/SEMG1/BBS2/XRCC3/MACF1/GNAI1/TTBK2/FGF13/CLIP1/RGN/TEX101/MAP1B/PSRC1/ROCK2/APC/NAT10/CKAP2/BORA/ATAT1/TRIM54/KATNB1/CEP131/ERBB2/PLK4/ANKRD53/…	118	0.468254
GO:0051209	BP	GO:0051209	release of sequestered calcium ion into cytosol	65/6492	124/18903	2.5549e-05	0.000814169	0.00061352	CX3CL1/ATP1A2/CYBA/MCOLN3/BAX/FKBP1A/P2RX7/SLC8B1/JPH4/ITPR3/ABL1/BDKRB1/HTR2A/CEMIP/TRPA1/PTPN6/PDE4D/CASQ2/PKD2/HRC/HTR2B/LHCGR/FGF2/CXCL9/METTL21C/TRPM2/XCL1/TRPC1/SNCA/CAMK2D/ANK2/HTR2C/JPH2/ITPR1/CACNA1C/AKAP6/JPH3/UBASH3B/CLIC2/GPER1/JSRP1/IL13/CXCL10/CXCL11/PRKCE/CHD7/P2RY6/CCL19/HAP1/CD19/F2/F2R/SLC8A1/PRKD1/RASA3/FLNA/PLN/RYR2/CALM1/RYR3/DMD/LIME1/GSTM2/LYN/ITGB3	65	0.524194
GO:1901653	BP	GO:1901653	cellular response to peptide	166/6492	373/18903	2.5836e-05	0.000819279	0.00061737	PDK4/PDK2/FYN/PIK3C2A/DDX11/IGF1/VIM/CYBA/GLP2R/CACNB1/PKM/PRKCZ/ROCK1/CAMK2A/SREBF1/ACTN2/NCOA1/SNX5/CDC6/SORBS1/TREM2/SIRT1/JAK2/PNPLA3/RANGAP1/SRSF5/PCK2/TRIB3/EEF2K/ZNF106/CA2/RIPK2/SLC39A14/TYK2/ATP1A3/FGF21/KLF1/PIK3R2/CAV1/GRB10/GHRHR/KANK1/HDAC5/NFKB1/GAB1/KLF3/TNS2/TIMELESS/GLP1R/GHR/KAT2B/GRB14/STAT1/NFE2L2/EPHA4/ERRFI1/FOXO3/NR4A3/RHOQ/SOCS2/INHBA/DNAI1/NR4A1/LRP1/STAT5A/KLF2/BCL2L2/MA…	166	0.44504
GO:0098742	BP	GO:0098742	cell-cell adhesion via plasma-membrane adhesion molecules	130/6492	282/18903	2.60553e-05	0.000822203	0.000619574	CX3CL1/SELE/CELSR3/PKD1/CD6/ATP2C1/CDH1/DSG2/WNK1/CDH3/CLDN18/CDH19/PVR/CDHR2/CDH17/PCDHB4/PCDHA6/PCDHGA2/IGSF9/CDHR5/ARVCF/CBLN1/CEACAM5/PTPRS/MAG/PCDHB2/PCDHB15/CDH6/IGSF21/APOA1/PCDHB8/MYOT/SLITRK3/CDH26/BMP2/LRFN3/CDHR3/LRRC4/PALLD/AJUBA/CDH15/GATA5/LRRC4B/VSTM2L/CRB1/DSC2/DSG1/DSC1/IL1RN/KLF4/MYPN/PCDH10/CLSTN3/AMIGO2/CDH24/CNTN4/IGSF11/TENM2/CRB2/TENM4/KIRREL3/ITGB1/SPARCL1/PTPRD/ROBO4/CXAD…	130	0.460993
GO:0030071	BP	GO:0030071	regulation of mitotic metaphase/anaphase transition	51/6492	92/18903	2.6291e-05	0.000825615	0.000622145	MAD1L1/DPF1/CUL3/SPDL1/SMARCD1/TRIP13/ACTB/SMARCA2/NDC80/SMARCD3/BIRC5/CDC6/SMARCB1/SMARCD2/FBXO5/TTK/MAD2L2/CDC20/CENPF/DUSP1/ZWINT/XRCC3/DLGAP5/SMARCA4/PHF10/CCNB1/CDCA8/APC/ESPL1/ACTL6A/CENPE/ANAPC11/NUF2/ATM/INCENP/SPC25/BUB3/BUB1B/SPC24/MAD2L1/PRAP1/PLK1/CDT1/BUB1/ZWILCH/UBE2C/GEN1/AURKB/KNTC1/LCMT1/DPF3	51	0.554348
GO:0140694	BP	GO:0140694	non-membrane-bounded organelle assembly	171/6492	386/18903	2.68709e-05	0.000838551	0.000631893	CSDE1/ANLN/BRCA1/MYOM2/MRTO4/ASPM/MEF2A/NLE1/CLASP1/FSCN1/WDR62/SPAG5/ACTN2/NDC80/AURKA/TPX2/BIRC5/KIF4A/EZR/CIRBP/SIX4/ASB2/MYBL2/CDS2/MYL9/CEP76/CENPT/CEP152/SQLE/ARHGEF10/TNNT1/AURKC/PLA2G4C/KAT2A/PRKAR1A/MYH3/MDM1/NOP2/FBXO5/SRF/CEP72/BRIX1/KAT2B/CENPA/AUP1/CHMP3/TIA1/WRAP73/CDC20/NEK2/PROX1/CENPF/TNNT2/GPSM2/LDB3/RPL5/CENPK/CDK2/STIL/SBDS/DLGAP5/VIL1/STYXL1/FLNC/TMOD2/LSM4/HAUS8/ERAL1/MYH11/…	171	0.443005
GO:0034767	BP	GO:0034767	positive regulation of ion transmembrane transport	91/6492	186/18903	2.69622e-05	0.000838551	0.000631893	CALCR/ABCC8/CX3CL1/EHD3/BAK1/KCNH2/WNK1/GAL/CACNG4/ACTN2/ADCYAP1R1/ABCB1/BAX/P2RX7/TREM2/ABL1/BDKRB1/CEMIP/CAV1/PPP3CB/P2RX1/CCL2/KCNA1/SLC38A1/IFNG/PKD2/PPP3CC/RAMP3/PLP1/WNK4/HSPA2/ATP1B2/RGN/EPHB2/P2RX4/TRPC6/LHCGR/COX17/TRPC3/CXCL9/XCL1/STAC/TRPC1/SNCA/ANK2/KCNMB1/JPH2/ITGB1/AKAP6/EDNRA/CNKSR3/CACNA2D1/RNF207/PINK1/IFNGR2/G6PD/GPER1/CDK5/CACNB2/STIM1/CACNB3/IL13/CXCL10/CXCL11/ADRB2/ARL6IP1/KC…	91	0.489247
GO:1901214	BP	GO:1901214	regulation of neuron death	147/6492	325/18903	2.72176e-05	0.000842442	0.000634825	CX3CL1/TFAP2B/FYN/GCLM/ERBB3/ROCK1/INPP5A/SNCB/MEF2C/BAX/CD200/TYRO3/MSH2/TREM2/SIRT1/JAK2/ABL1/CDC34/HMOX1/SIX4/NFATC4/MYBL2/CTSZ/TOX3/FGF21/MAG/GRIK5/CASP2/AIMP2/GATA3/UNC5B/FGF8/PITX3/DKK1/CSF3/CCL2/WFS1/TRIM2/PPARGC1A/CCND1/MDK/IFNG/NCOA7/SOD2/GHR/NR3C1/CPEB4/LANCL1/DHCR24/KMO/KIF14/FOXO3/NR4A3/TGFB3/EGR1/CLU/GRM4/SIX1/TRAF2/KDR/PARP2/EPO/SERPINF1/NES/VSTM2L/CASP9/NGF/IL6ST/MTNR1B/EPHA7/AGAP2…	147	0.452308
GO:0003179	BP	GO:0003179	heart valve morphogenesis	34/6492	55/18903	2.83719e-05	0.000871193	0.00065649	ELN/TIE1/ROCK1/MEF2C/TBX5/GATA3/BMPR1A/SNAI1/SOX4/SOX9/BMP2/OLFM1/GATA5/NFATC1/NOTCH2/ROCK2/HEY2/MDM2/STRA6/EMILIN1/SMAD4/SLIT2/TGFBR2/ADAMTS9/TBX20/HEY1/NOS3/DCHS1/EFNA1/ZFPM1/NKX2-5/SLIT3/BMPR2/SCX	34	0.618182
GO:2000027	BP	GO:2000027	regulation of animal organ morphogenesis	67/6492	129/18903	2.85068e-05	0.000871193	0.00065649	SOX8/CELSR3/MKS1/HGF/DMRT3/FGF10/PAX2/ABL1/DAAM1/SIX4/SPEF1/SFRP1/PLEKHA4/WNT2/GATA3/BMPR1A/FGF8/DKK1/PTK7/HOXC11/RUNX2/SOX9/PAX8/BMP2/SIX1/GATA5/WNT2B/ANKRD6/SULF1/FGF2/PRICKLE1/FGF7/NKD1/ARHGEF19/SFRP2/RSPO3/RSPO2/WNT7A/APCDD1/FZD7/MSX1/PRICKLE2/SPRY1/CITED2/SHH/TNFRSF11B/FZD6/CTHRC1/DACT1/MESP1/GREM1/GDNF/ROR2/AR/CD34/MAGED1/FZD2/GPC6/TBX1/WT1/ROR1/SAPCD2/MAGI2/SP6/AJAP1/HOXB7/LHX1	67	0.51938
GO:0032392	BP	GO:0032392	DNA geometric change	54/6492	99/18903	2.85504e-05	0.000871193	0.00065649	DDX11/HMGB3/RFC2/RAD51/POLQ/MCM2/MCM6/ATRX/RAD54L/CDC45/MCM5/ASCC2/GINS1/MCM4/ERCC2/SETX/RECQL5/RFC5/MCM3/CHD5/WRNIP1/DTD1/MCM8/CHTF18/MTERF1/GINS2/TOP2A/RFC3/ANXA1/BRIP1/DSCC1/HMGA1/DNA2/PIF1/DQX1/GINS4/CHD1/RECQL4/HFM1/RFC4/HMGB2/MCM7/CHD7/CHD2/RUVBL1/CHD9/MCMDC2/GINS3/RUVBL2/PURA/ERCC6L/RAD54B/BLM/DDX3X	54	0.545455
GO:0072207	BP	GO:0072207	metanephric epithelium development	20/6492	27/18903	2.88885e-05	0.000877371	0.000661146	SOX8/PKD1/WWTR1/ACAT1/PAX2/CALB1/HES1/STAT1/PKD2/SOX9/PAX8/LIF/YAP1/OSR1/LAMB2/CXCR2/WT1/HES5/POU3F3/AQP1	20	0.740741
GO:0071805	BP	GO:0071805	potassium ion transmembrane transport	106/6492	223/18903	2.96351e-05	0.000895838	0.000675062	ABCC8/ATP1A2/FHL1/KCNG1/KCNH2/WNK1/SLC9A7/ABCC9/GAL/ATP12A/ACTN2/SLC1A3/KCNN2/KCNK2/KCNH4/TREM2/KCNK6/HCN2/NALCN/KCNA7/SLC17A7/ATP1A3/ATP4A/HPN/CAV1/PKD2L1/KCNA1/SLC12A7/KCNIP3/KCNJ13/KCNQ4/CASQ2/PKD2/KCNJ8/KCNS1/SLC12A5/KCNK17/WNK4/ATP1B2/KCNA5/DPP6/KCNC3/GRP/MTNR1B/SLC9A5/BIN1/HCN4/SLC24A4/KCNN3/HCN3/ANK2/KCNMB1/SLC12A9/ITGB1/FXYD4/AKAP6/KCNE4/KCNK13/SLC24A2/KCNMA1/KCNS2/KCNJ6/KCNJ15/RNF207/KCN…	106	0.475336
GO:0006875	BP	GO:0006875	cellular metal ion homeostasis	184/6492	420/18903	2.99253e-05	0.000899078	0.000677503	CX3CL1/CYB561/ATP2C1/SLC11A1/ATP1A2/BAK1/CP/MCUR1/CYBA/MCOLN3/ATP2B4/ATP2C2/ATP2B3/ATP6AP1/CYBRD1/TFRC/ATP2A3/ATP12A/SLC46A1/SLC1A3/BAX/FKBP1A/P2RX7/SLC8B1/HEPH/JPH4/SLC22A17/ITPR3/ABL1/HMOX1/SLC8A3/BDKRB1/HTR2A/CEMIP/SLC30A4/TRPA1/CALB1/SLC39A14/DMPK/ATP1A3/ATP4A/ATP13A1/CAV1/TFR2/CXCL12/P2RX1/CCL7/WFS1/TCIRG1/IFNG/PTPN6/SLC39A7/PDE4D/IL1A/SLC30A3/SLC8A2/CASQ2/PKD2/ACO1/MT1G/SLC25A23/ATP13A4/STE…	184	0.438095
GO:0048146	BP	GO:0048146	positive regulation of fibroblast proliferation	33/6492	53/18903	3.00202e-05	0.000899078	0.000677503	IGF1/FGF10/FOSL2/SIRT6/ESR1/CDC6/ABL1/PDGFB/E2F1/WNT2/CDKN1A/EREG/LIF/CCNB1/PDGFRA/CDK4/MYC/PML/CCNA2/PDGFC/DDR2/IL13/PDGFD/HRAS/CD248/SPHK1/JUN/CTC1/GAS6/S100A6/AQP1/MIF/ITGB3	33	0.622642
GO:0060402	BP	GO:0060402	calcium ion transport into cytosol	21/6492	29/18903	3.20496e-05	0.000955434	0.00071997	BAK1/ADCYAP1R1/BAX/P2RX7/JPH4/CAV1/ADRA1A/EPO/P2RX4/LHCGR/TRPC3/PML/JPH2/CACNA1C/CACNA2D1/JPH3/CACNB3/BCL2/GRIN1/SLC8A1/RYR2	21	0.724138
GO:1901888	BP	GO:1901888	regulation of cell junction assembly	98/6492	204/18903	3.44349e-05	0.00101448	0.000764462	MYCBP2/MUSK/MYOC/VCL/EPHA3/GPM6B/ARHGAP6/NTN1/SLK/ROCK1/FERMT2/CLASP1/CAMSAP3/MEF2C/COL16A1/TBX5/ABL1/SIX4/CBLN1/EEF2K/TJP1/SFRP1/CAV1/DKK1/DUSP3/CORO1C/IL17A/DUSP22/HRG/RAP1A/TEK/SLITRK3/SNAI1/RAB17/LRFN3/SIX1/MACF1/KDR/LRRC4B/NPHP4/EPHB2/ROCK2/EPHA7/TLN1/TLR2/THBS1/CLSTN3/AMIGO2/ACVRL1/NTRK3/ST8SIA2/EPHA2/NPHP1/PHLDB2/SNCA/LRRTM2/PTPRD/WNT7A/EPHB1/MMP14/CLSTN2/F11R/CHRNB2/LRRTM1/PDLIM5/FZD5/CLD…	98	0.480392
GO:0061647	BP	GO:0061647	histone H3-K9 modification	30/6492	47/18903	3.4574e-05	0.00101448	0.000764462	KDM1A/JARID2/BRCA1/ARID4A/SPHK2/ATRX/DNMT3B/SIRT1/SMARCB1/SUV39H1/PIH1D1/GATA3/KAT2B/KMT2A/MYB/PRDM12/DNMT1/PRDM5/SMAD4/SETDB1/SETD7/CHEK1/SUV39H2/CRTC2/LMNA/PRDM9/MECP2/PWWP2B/BEND3/NAP1L2	30	0.638298
GO:1905818	BP	GO:1905818	regulation of chromosome separation	59/6492	111/18903	3.47921e-05	0.00101448	0.000764462	MAD1L1/DPF1/TACC3/CUL3/SPDL1/SMARCD1/TRIP13/ACTB/SMARCA2/NDC80/SMARCD3/BIRC5/CDC6/SMARCB1/SMARCD2/NCAPG/FBXO5/TTK/SMC4/MAD2L2/CDC20/CENPF/DUSP1/NCAPH/ZWINT/XRCC3/DLGAP5/SMARCA4/PHF10/CCNB1/CDCA8/APC/ESPL1/ACTL6A/SMC2/CENPE/ANAPC11/NUF2/NCAPG2/ATM/INCENP/SPC25/BUB3/BUB1B/SPC24/MAD2L1/PTTG1/PRAP1/PLK1/CDT1/BUB1/ZWILCH/UBE2C/GEN1/AURKB/MAPK15/KNTC1/LCMT1/DPF3	59	0.531532
GO:0007091	BP	GO:0007091	metaphase/anaphase transition of mitotic cell cycle	52/6492	95/18903	3.50975e-05	0.00101448	0.000764462	MAD1L1/DPF1/TACC3/CUL3/SPDL1/SMARCD1/TRIP13/ACTB/SMARCA2/NDC80/SMARCD3/BIRC5/CDC6/SMARCB1/SMARCD2/FBXO5/TTK/MAD2L2/CDC20/CENPF/DUSP1/ZWINT/XRCC3/DLGAP5/SMARCA4/PHF10/CCNB1/CDCA8/APC/ESPL1/ACTL6A/CENPE/ANAPC11/NUF2/ATM/INCENP/SPC25/BUB3/BUB1B/SPC24/MAD2L1/PRAP1/PLK1/CDT1/BUB1/ZWILCH/UBE2C/GEN1/AURKB/KNTC1/LCMT1/DPF3	52	0.547368
GO:0034109	BP	GO:0034109	homotypic cell-cell adhesion	52/6492	95/18903	3.50975e-05	0.00101448	0.000764462	PLAUR/VCL/DSG2/PKP2/PTPRU/TSPAN32/CDHR2/ACTB/GP6/TYRO3/JAK2/CDHR5/CTSG/MYL9/GATA1/CEACAM5/COMP/PTPN6/MPL/TNFSF11/IL6ST/DSC2/PDGFRA/IL6/BLK/STXBP1/TLN1/MMRN1/SLC7A11/UBASH3B/PRKCA/CXADR/MEGF11/F11R/CSRP1/JAK1/ILK/P2RY12/FGG/FGA/FGB/FIBP/CTNNA3/PRKG1/BLOC1S4/PEAR1/PPIA/FLNA/MFSD2B/HBB/LYN/ITGB3	52	0.547368
GO:1902099	BP	GO:1902099	regulation of metaphase/anaphase transition of cell cycle	52/6492	95/18903	3.50975e-05	0.00101448	0.000764462	MAD1L1/DPF1/CUL3/SPDL1/SMARCD1/TRIP13/ACTB/SMARCA2/NDC80/SMARCD3/BIRC5/CDC6/SMARCB1/SMARCD2/FBXO5/TTK/MAD2L2/CDC20/CENPF/DUSP1/ZWINT/XRCC3/DLGAP5/SMARCA4/PHF10/CCNB1/CDCA8/APC/ESPL1/ACTL6A/CENPE/ANAPC11/NUF2/ATM/INCENP/SPC25/BUB3/BUB1B/SPC24/MAD2L1/PRAP1/PLK1/CDT1/BUB1/ZWILCH/UBE2C/GEN1/AURKB/MAPK15/KNTC1/LCMT1/DPF3	52	0.547368
GO:0051983	BP	GO:0051983	regulation of chromosome segregation	68/6492	132/18903	3.51279e-05	0.00101448	0.000764462	MAD1L1/DPF1/TACC3/CUL3/SPDL1/SMARCD1/RAD18/TRIP13/ACTB/SMARCA2/NDC80/SMARCD3/BIRC5/CDC6/SMARCB1/SMARCD2/NCAPG/FBXO5/TTK/SMC4/KAT2B/MAD2L2/CDC20/CENPF/DUSP1/NCAPH/ZWINT/XRCC3/DLGAP5/SMARCA4/PHF10/CCNB1/CDCA8/APC/ESPL1/ACTL6A/SMC2/CENPE/ANAPC11/KIF2C/NUF2/HORMAD1/NCAPG2/MKI67/ATM/INCENP/SPC25/BUB3/BUB1B/SPC24/SMC6/MAD2L1/PTTG1/PRAP1/PLK1/CDT1/BUB1/ZWILCH/UBE2C/RMI2/GEN1/AURKB/RCC2/MAPK15/KNTC1/CDCA…	68	0.515152
GO:0014003	BP	GO:0014003	oligodendrocyte development	28/6492	43/18903	3.68513e-05	0.00105952	0.000798401	CNTN1/FA2H/ERCC2/MAG/ASPA/CNTNAP1/CLU/PLP1/MYRF/NKX2-2/NSUN5/WASF3/TLR2/TENM4/PRDM8/B4GALT5/NCSTN/SHH/TPPP/PTEN/ID4/SOX11/KCNJ10/CNTN2/HES5/LPAR1/LYN/ZNF488	28	0.651163
GO:0050673	BP	GO:0050673	epithelial cell proliferation	207/6492	481/18903	3.79011e-05	0.00108488	0.000817512	WNT16/ARX/DLX6/NME2/BID/IGF1/HGF/BAK1/CYBA/PTPRN/RASGRF1/CDH3/TIE1/IFT80/TGFBR3/FGF10/LIMS2/SCARB1/TP63/MYDGF/PAX2/RAP1GAP/SIRT6/FGFR1/FAP/CPB2/MEF2C/PGR/BAX/APOH/ESR1/TGM1/SIRT1/HMOX1/PDGFB/SIX4/FERMT1/PPP1R16B/FGF9/RGCC/ESRP2/FA2H/EYA1/SFRP1/FGL1/HPN/DLX5/CAV1/WNT2/GATA3/CXCL12/BMPR1A/CCL2/AREG/CCND1/MDK/GLI1/IL26/ST8SIA1/BMP5/PDCD10/HES1/HYAL1/TACR1/STAT1/IGFBP5/ID2/ERRFI1/AKT3/F3/RPS6KA1/PROX…	207	0.430353
GO:0032508	BP	GO:0032508	DNA duplex unwinding	51/6492	93/18903	3.8898e-05	0.00110851	0.00083532	DDX11/RFC2/RAD51/POLQ/MCM2/MCM6/ATRX/RAD54L/CDC45/MCM5/ASCC2/GINS1/MCM4/ERCC2/SETX/RECQL5/RFC5/MCM3/CHD5/WRNIP1/DTD1/MCM8/CHTF18/GINS2/TOP2A/RFC3/ANXA1/BRIP1/DSCC1/HMGA1/DNA2/PIF1/DQX1/GINS4/CHD1/RECQL4/HFM1/RFC4/MCM7/CHD7/CHD2/RUVBL1/CHD9/MCMDC2/GINS3/RUVBL2/PURA/ERCC6L/RAD54B/BLM/DDX3X	51	0.548387
GO:0051384	BP	GO:0051384	response to glucocorticoid	72/6492	142/18903	4.16219e-05	0.00118093	0.000889894	CALCR/PTPRU/MAOB/PTGS2/TFAP4/JAK2/PCK2/ACSBG1/GHRHR/PTGDS/AREG/CCND1/MDK/GHR/NR3C1/BCHE/IGFBP2/ERRFI1/FOXO3/KLF9/FLT3/FOSB/ZFP36/MYOD1/CDO1/EPO/SERPINF1/PCNA/CASP9/ANXA1/IL6/IL1RN/CYP1B1/PDX1/METTL21C/NTRK3/SLIT2/SRD5A1/PAM/ALAD/ZFP36L2/BCL2L11/PPARGC1B/FBXO32/TRIM63/PFKFB1/APOA2/STC1/AGL/CLDN1/IGFBP7/UCN/GJB2/AVPR1A/DDIT4/FAM107A/GLB1/FOS/BCL2/NPAS4/FOSL1/A2M/HSD11B2/TYMS/TH/SLIT3/SMYD3/ZFP36L1/…	72	0.507042
GO:0045446	BP	GO:0045446	endothelial cell differentiation	63/6492	121/18903	4.42037e-05	0.00124871	0.000940967	VCL/FOXJ2/TIE1/ROCK1/RAPGEF3/ADD1/EZR/PPP1R16B/TJP1/MET/HOXA13/PLOD3/PDE4D/ACVR2B/ARHGEF26/PROC/RAP1A/PROX1/HOXB5/CXCR4/KDR/BARX1/KDM6B/HAPLN2/BTG1/ROCK2/HEY2/EDNRB/VEZF1/ACVRL1/SMAD4/ZEB1/EDNRA/ROBO4/XDH/F11R/STC1/SCUBE1/CLDN1/FSTL1/HEY1/SOX17/CLDN3/TMEM100/MESP1/COL22A1/CLIC4/FASN/S1PR1/HEG1/APOLD1/CDH5/MYADM/FZD2/PLCB1/COL18A1/CLDN5/PDE2A/BMPR2/S1PR3/GPX1/PECAM1/S1PR2	63	0.520661
GO:0003208	BP	GO:0003208	cardiac ventricle morphogenesis	41/6492	71/18903	4.47858e-05	0.00125965	0.000949213	PKP2/COL11A1/TGFBR3/MEF2C/LRP2/SMARCD3/GRHL2/FKBP1A/TBX5/SMAD7/FOXF1/PPP1R13L/GATA3/BMPR1A/CPE/HAND1/TNNC1/PROX1/TNNT2/SOX4/TNNI3/HEY2/TPM1/SMAD4/SFRP2/EDNRA/POU4F1/TNNI1/MYL3/FOXH1/TGFBR2/HAND2/TBX20/HEY1/MESP1/ZFPM2/CHD7/HEG1/SOX11/NKX2-5/RYR2	41	0.577465
GO:0001541	BP	GO:0001541	ovarian follicle development	35/6492	58/18903	4.51778e-05	0.00126517	0.000953377	KITLG/BAX/MMP2/ESR1/AMH/LFNG/FOXO3/INHBA/TNFAIP6/INHA/EREG/KDR/VGF/TAF4/CGA/LHCGR/BMPR1B/SCAPER/SMAD4/GNRH1/ATM/MMP14/KIT/INHBB/PTX3/FSHR/BCL2L1/BCL2/GPR149/UMODL1/FOXL2/ZP3/SRC/ANG/FANCG	35	0.603448
GO:0010965	BP	GO:0010965	regulation of mitotic sister chromatid separation	53/6492	98/18903	4.60575e-05	0.00127874	0.000963597	MAD1L1/DPF1/TACC3/CUL3/SPDL1/SMARCD1/TRIP13/ACTB/SMARCA2/NDC80/SMARCD3/BIRC5/CDC6/SMARCB1/SMARCD2/FBXO5/TTK/MAD2L2/CDC20/CENPF/DUSP1/ZWINT/XRCC3/DLGAP5/SMARCA4/PHF10/CCNB1/CDCA8/APC/ESPL1/ACTL6A/CENPE/ANAPC11/NUF2/ATM/INCENP/SPC25/BUB3/BUB1B/SPC24/MAD2L1/PTTG1/PRAP1/PLK1/CDT1/BUB1/ZWILCH/UBE2C/GEN1/AURKB/KNTC1/LCMT1/DPF3	53	0.540816
GO:0044784	BP	GO:0044784	metaphase/anaphase transition of cell cycle	53/6492	98/18903	4.60575e-05	0.00127874	0.000963597	MAD1L1/DPF1/TACC3/CUL3/SPDL1/SMARCD1/TRIP13/ACTB/SMARCA2/NDC80/SMARCD3/BIRC5/CDC6/SMARCB1/SMARCD2/FBXO5/TTK/MAD2L2/CDC20/CENPF/DUSP1/ZWINT/XRCC3/DLGAP5/SMARCA4/PHF10/CCNB1/CDCA8/APC/ESPL1/ACTL6A/CENPE/ANAPC11/NUF2/ATM/INCENP/SPC25/BUB3/BUB1B/SPC24/MAD2L1/PRAP1/PLK1/CDT1/BUB1/ZWILCH/UBE2C/GEN1/AURKB/MAPK15/KNTC1/LCMT1/DPF3	53	0.540816
GO:0060048	BP	GO:0060048	cardiac muscle contraction	71/6492	140/18903	4.65054e-05	0.00128566	0.000968811	EHD3/ATP1A2/MAP2K3/DSG2/KCNH2/PKP2/ABCC9/KCNN2/MYLK2/SNTA1/SMAD7/PPP1R13L/SCN1B/CAV1/PDE4D/NUP155/TNNC1/RGS2/TNNI3K/TNNT2/CASQ2/ADRA1A/KCNJ8/CXCR4/FGF13/TNNI3/KCNA5/HRC/TRPM4/TNNI2/DSC2/P2RX4/BIN1/HCN4/PDE5A/TPM1/CAMK2D/ANK2/GSN/SCN2B/CACNA1C/KCNE4/GPD1L/CACNA2D1/CLIC2/RNF207/STC1/TNNI1/MYL3/KCNJ3/ADORA1/UCN/CACNB2/SCN3B/SGCD/GAA/KCND3/VEGFB/TCAP/SCN4B/GJC1/SLC8A1/NKX2-5/CTNNA3/PDE4B/FLNA/PLN/RYR…	71	0.507143
GO:0006268	BP	GO:0006268	DNA unwinding involved in DNA replication	17/6492	22/18903	4.75821e-05	0.00130982	0.000987023	RAD51/MCM2/MCM6/CDC45/MCM5/GINS1/MCM4/RECQL5/MCM3/GINS2/HMGA1/GINS4/RECQL4/MCM7/GINS3/PURA/BLM	17	0.772727
GO:0072503	BP	GO:0072503	cellular divalent inorganic cation homeostasis	145/6492	323/18903	4.85606e-05	0.00133002	0.00100224	CX3CL1/ATP2C1/SLC11A1/ATP1A2/BAK1/MCUR1/CYBA/MCOLN3/ATP2B4/ATP2C2/ATP2B3/ATP2A3/BAX/FKBP1A/P2RX7/SLC8B1/JPH4/ITPR3/ABL1/SLC8A3/BDKRB1/HTR2A/CEMIP/SLC30A4/TRPA1/CALB1/SLC39A14/DMPK/ATP13A1/CAV1/CXCL12/P2RX1/CCL7/WFS1/TCIRG1/PTPN6/SLC39A7/PDE4D/SLC30A3/SLC8A2/CASQ2/PKD2/MT1G/SLC25A23/ATP13A4/TNNI3/HRC/RGN/TRPC4/TPT1/TMEM165/HTR1B/HTR2B/TRPC6/LHCGR/FGF2/TRPC3/CXCL9/SLC39A8/SLC39A5/METTL21C/SLC24A4/P…	145	0.448916
GO:0045109	BP	GO:0045109	intermediate filament organization	40/6492	69/18903	4.89327e-05	0.00133002	0.00100224	KRT33A/VIM/PKP2/PKP1/KRT31/KRT23/KRT37/KRT34/KRT33B/PRPH/KRT85/KRT7/KRT71/INA/TCHH/SHH/KRT8/KRT78/KRT86/KRT75/KRT6C/KRT74/KRT83/KRT38/KRT13/KRT9/KRT20/DES/KRT6B/KRT79/KRT3/KRT16/KRT14/KRT77/KRT39/KRT40/KRT6A/KRT81/EPPK1/NEFL	40	0.57971
GO:0051148	BP	GO:0051148	negative regulation of muscle cell differentiation	40/6492	69/18903	4.89327e-05	0.00133002	0.00100224	PTBP1/PRDM6/HDAC4/NFATC3/PDGFB/NFATC2/FGF9/CEACAM5/EZH2/BMPR1A/DKK1/HDAC5/SOX6/FOXP1/ID2/RGS2/EREG/BMP2/DNMT1/NFATC1/HEY2/MYOCD/SMAD4/PDCD4/FZD7/G6PD/MSX1/TCF23/PI16/SHH/RBPMS2/IGF2/MECP2/BDNF/TRIM72/NKX2-5/TMEM119/FOXO4/PPARA/BMPR2	40	0.57971
GO:0002064	BP	GO:0002064	epithelial cell development	101/6492	213/18903	5.09022e-05	0.00137777	0.00103822	SOX8/VIM/ARID4A/VCL/ROS1/PRDM1/ROCK1/TP63/FOSL2/RARB/RAPGEF3/PGR/GRHL2/ATRX/AKR1B1/ADD1/ESR1/EZR/PDGFB/HNF4A/PPP1R16B/VSIG1/GATA1/TJP1/SIPA1L3/MET/HOXA13/PLOD3/ACTA2/NKX3-2/BMP5/PDE4D/ARHGEF26/IL1A/PROC/RAP1A/PROX1/ONECUT2/CXCR4/SOX9/NKX2-2/KDR/PALLD/FOXJ1/RARA/HAPLN2/NOTCH2/ROCK2/IL6ST/CLOCK/EDNRB/VEZF1/TMOD1/DMRT1/YAP1/SIX3/ABI2/SHROOM3/FRMD6/IQGAP1/EPHA2/ABCA12/ST14/SIDT2/FER/EDNRA/ROBO4/WNT7A…	101	0.474178
GO:0021543	BP	GO:0021543	pallium development	85/6492	174/18903	5.22754e-05	0.00140904	0.00106179	KDM1A/ARX/PAFAH1B1/TACC3/UBA6/PHLPP2/ATP2B4/CDON/ASPM/WDR62/BAX/LHX5/ATP1A3/OGDH/EZH2/LHX2/LHX6/FGF8/EZH1/MDK/KCNA1/PHACTR1/NR2E1/SRF/DLX2/PROX1/KIF14/BBS2/MBOAT7/FOXP2/FGF13/NSUN5/MAS1/PLXNA3/RARA/BCAN/SLC38A2/EMX1/NKX2-1/TBR1/DAB2IP/ATAT1/MGARP/TACC2/DMRTA2/DLX1/TMEM108/SLIT2/EPHA5/SRD5A1/TACC1/FEZ1/KIRREL3/DIXDC1/ZIC1/LRP8/GART/IGF2BP1/BTG2/LMX1A/CCDC141/CDK5/NDEL1/SEMA6B/CEP120/P2RY12/DCLK2/C…	85	0.488506
GO:0045664	BP	GO:0045664	regulation of neuron differentiation	94/6492	196/18903	5.32984e-05	0.00143065	0.00107807	SOX8/SPAG9/LTK/CDON/HMG20B/ASPM/ROCK1/TCF3/NOTCH3/WDR62/RAP1GAP/FGFR1/TP73/MEF2C/NCOA1/NRCAM/DPYSL2/CDK5RAP1/EYA1/SFRP1/ESRP1/MAG/CXCL12/DKK1/CDK5RAP3/NR2E1/BCL6/HES1/ECT2/ID2/DLX2/MYCL/PROX1/FOXO3/SOCS2/SOX9/NKX2-2/BMP2/SIX1/RNF112/FEZF1/EPO/CASZ1/MAP1B/RARA/LIN28A/NGF/HEY2/EDNRB/BIN1/SIX3/LBX1/FGF2/SH3GL3/EFNA3/MEIS1/DLX1/CNTN4/SFRP2/ZEB1/FEZ1/ITGB1/DIXDC1/ISL2/LMX1A/NKX6-1/HEY1/SHH/RAC3/NLGN1/…	94	0.479592
GO:0043434	BP	GO:0043434	response to peptide hormone	183/6492	421/18903	5.35934e-05	0.00143202	0.0010791	PDK4/PDK2/ABCC8/CRY1/PIK3C2A/OTC/CYBA/GLP2R/PKM/PRKCZ/ROCK1/GAL/TGFBR3/LRP6/CAMK2A/SREBF1/PTGS2/ACTN2/NCOA1/SNX5/CDC6/SORBS1/SIRT1/JAK2/PNPLA3/RANGAP1/SRSF5/PCK2/TRIB3/PHEX/EEF2K/ZNF106/CA2/SLC39A14/TYK2/FGF21/PIK3R2/CAV1/GRB10/GHRHR/KANK1/CXCL12/HDAC5/NFKB1/AREG/GAB1/TNS2/GLP1R/GHR/KAT2B/SCAP/GRB14/REG1A/STAT1/IGFBP5/NFE2L2/ERRFI1/NR4A3/RHOQ/EGR1/SOCS2/CRY2/CAT/INHBA/DNAI1/EGR2/NR4A1/EREG/STAT5A…	183	0.434679
GO:0007160	BP	GO:0007160	cell-matrix adhesion	111/6492	238/18903	5.37921e-05	0.00143202	0.0010791	ITGA3/ITGA2B/CX3CL1/PKD1/MYOC/VCL/EPHA3/GPM6B/ARHGAP6/SLK/PRKCZ/ROCK1/ACTN1/FERMT2/CLASP1/CAMSAP3/ACTN2/ITGA8/COL5A3/COL16A1/EPDR1/SORBS1/ABL1/MADCAM1/FERMT1/MSLN/CORO2B/SFRP1/ECM2/DUSP3/TECTA/CORO1C/SRF/DUSP22/HRG/BCL6/ITGB6/NID1/ONECUT2/TEK/TNN/PLAU/RRAS/MACF1/SGCE/KDR/AJUBA/TIMM10B/ITGB4/ANGPTL3/LYVE1/ROCK2/ITGA7/TLN1/TMEM8B/THBS1/EMILIN1/PPFIA2/ACVRL1/FBLN5/ITGA10/ADAM15/ITGA9/PHLDB2/PIK3R1/C…	111	0.466387
GO:0022010	BP	GO:0022010	central nervous system myelination	18/6492	24/18903	5.60469e-05	0.00147385	0.00111063	CNTN1/FA2H/ERCC2/MAG/ASPA/CNTNAP1/CLU/PLP1/MYRF/TLR2/TENM4/B4GALT5/NCSTN/PTEN/ID4/KCNJ10/CNTN2/HES5	18	0.75
GO:0030539	BP	GO:0030539	male genitalia development	18/6492	24/18903	5.60469e-05	0.00147385	0.00111063	ASB1/FGF10/HOXA13/FGF8/BMP5/DHCR24/HSD17B3/PDGFRA/LHCGR/GREB1L/SRD5A1/KLHL10/SHH/ROR2/AR/WT1/SYCP2/SRD5A2	18	0.75
GO:0032291	BP	GO:0032291	axon ensheathment in central nervous system	18/6492	24/18903	5.60469e-05	0.00147385	0.00111063	CNTN1/FA2H/ERCC2/MAG/ASPA/CNTNAP1/CLU/PLP1/MYRF/TLR2/TENM4/B4GALT5/NCSTN/PTEN/ID4/KCNJ10/CNTN2/HES5	18	0.75
GO:0042886	BP	GO:0042886	amide transport	134/6492	296/18903	5.72964e-05	0.00150061	0.00113079	ABCC8/NOS2/TFAP2B/SYT7/SLC25A39/SLC38A5/PTPRN/GAL/SREBF1/TACR2/SLC46A1/SIRT6/CDH17/LRP2/AACS/ABCB1/SLC15A1/SLC8B1/RAPGEF4/JAK2/LRP5L/PICK1/PCK2/HNF4A/CDK16/AQP9/CA2/SFRP1/PLEKHA8/STX1A/GHRHR/TFR2/RAB11FIP2/PPP3CB/CPE/FOLR1/TCIRG1/IFNG/SLC16A10/ACVR2B/PASK/PLEKHA3/SLC19A2/KLF7/SNX19/TNFSF11/SOX4/ABCC4/PAX8/FOXA2/VGF/KCNA5/TRPM4/ANO1/NR0B2/PER2/GRP/MTNR1B/CLOCK/ANXA1/GLUL/IL6/BLK/IL1RN/UQCC2/SLC5A6…	134	0.452703
GO:0021536	BP	GO:0021536	diencephalon development	43/6492	76/18903	5.7633e-05	0.00150334	0.00113285	ARX/CDH1/PITX1/FGF10/GLI2/BAX/SALL1/OGDH/GHRHR/LHX3/BMPR1A/FGF8/GLI1/HES1/PLXNA1/OTX1/RAB3GAP1/NRP2/BMP2/PLXNA3/RAX/NKX2-1/SIX3/FGF2/TBX19/SRD5A1/POU4F1/NR4A2/CHRNB2/INHBB/HESX1/PITX2/SHH/GBX2/SEMA3E/OTP/FOXB1/NDNF/HAP1/CNTNAP2/NHLH2/TAL2/SRD5A2	43	0.565789
GO:0001885	BP	GO:0001885	endothelial cell development	38/6492	65/18903	5.81799e-05	0.00151151	0.001139	VCL/ROCK1/RAPGEF3/ADD1/EZR/PPP1R16B/TJP1/MET/HOXA13/PLOD3/PDE4D/ARHGEF26/PROC/RAP1A/HAPLN2/ROCK2/EDNRB/VEZF1/EDNRA/ROBO4/F11R/STC1/CLDN1/CLDN3/COL22A1/CLIC4/FASN/HEG1/CDH5/MYADM/PLCB1/COL18A1/CLDN5/PDE2A/S1PR3/GPX1/PECAM1/S1PR2	38	0.584615
GO:0051651	BP	GO:0051651	maintenance of location in cell	106/6492	226/18903	5.89449e-05	0.00152526	0.00114936	CX3CL1/PAFAH1B1/ATP1A2/TMSB10/HSPA5/VPS13D/CYBA/MCOLN3/ASPM/BAX/FKBP1A/P2RX7/SLC8B1/JPH4/ITPR3/ABL1/KDELR3/RANGAP1/BDKRB1/HTR2A/ARL2BP/CEMIP/SLC30A4/TRPA1/KDELR1/GRIK5/CAV1/PTPN6/PDE4D/SLC30A3/CASQ2/PKD2/GPSM2/SRGN/SLC25A23/VPS13C/HRC/SYNE1/FTHL17/DZIP1/HTR2B/KDELR2/NR5A1/LHCGR/FGF2/CXCL9/METTL21C/PML/TRPM2/XCL1/S100A8/TRPC1/SNCA/CAMK2D/ANK2/HTR2C/GSN/JPH2/ITPR1/CACNA1C/AKAP6/JPH3/UBASH3B/CLIC2/H…	106	0.469027
GO:0098656	BP	GO:0098656	anion transmembrane transport	122/6492	266/18903	5.99719e-05	0.00154565	0.00116473	SLC25A13/SLC6A13/GABRA3/SLC25A39/CLCA4/SLC38A5/SLC11A1/ATP1A2/BEST2/ANO2/MPC1/ANO8/SLC46A1/SLC1A3/SLC35C2/LRP2/ABCB1/SLC4A11/SLC26A3/SLC25A1/SLC16A8/APOL1/SLC25A17/SLC25A14/SLC35A2/GABRE/SLC25A15/SLC38A7/SLC17A7/SLC1A6/SLC5A5/GABRA4/MFSD10/FOLR1/SLC38A1/SLC4A9/GABRG2/SLC12A7/CLCN2/SLC25A12/SLC1A4/RGS2/SLC16A7/SLC25A2/SLC35B1/SLC12A5/ABCC4/SLC25A19/BEST3/SLC6A8/ANO1/PER2/SLC38A2/ANO3/ADAMTS8/TTYH3…	122	0.458647
GO:0010171	BP	GO:0010171	body morphogenesis	30/6492	48/18903	6.19662e-05	0.00159071	0.00119869	PHLDB1/CDON/CLASP1/MMP2/CRISPLD2/DLX5/DKK1/WNT3/MYH3/RAB3GAP1/TGFB3/RRAS/PDGFRA/STRA6/CSRNP1/PHLDB2/ARID5B/SSBP3/SKI/FLVCR1/MSX1/IHH/TIPARP/SGPL1/PTPN11/GREM2/MAB21L2/TBX1/CLDN5/SCX	30	0.625
GO:0009791	BP	GO:0009791	post-embryonic development	50/6492	92/18903	6.31042e-05	0.00160814	0.00121182	BAK1/PRDM1/ATRX/BAX/JAK2/ABL1/PPP1R13L/ERCC2/GATA3/SOD2/GABRG2/ACVR2B/EFEMP1/ASH1L/ACADM/MFAP2/KMT2A/NKX2-3/ACO1/PLAGL2/ASL/KDR/CRB1/EMX1/KLF4/MYO7A/CYP1A2/CSRNP1/ATM/ARID5B/ITPR1/BCL2L11/NR4A2/SCUBE1/FZD5/STK36/TIPARP/SLC18A2/FBN1/SGPL1/MECP2/ATF5/CHST11/BCL2/HEG1/NDN/TAL2/GIGYF2/HMGN1/LHX1	50	0.543478
GO:0050807	BP	GO:0050807	regulation of synapse organization	99/6492	209/18903	6.3193e-05	0.00160814	0.00121182	SEMA3F/MYCBP2/PAFAH1B1/FYN/MUSK/CAMK2B/NTN1/CTNNA2/CTTNBP2/MEF2C/IGSF9/NRCAM/TREM2/ABL1/SIX4/NFATC4/ZDHHC15/CBLN1/EEF2K/DMPK/NEURL1/DKK1/NEDD9/TANC1/EPHA4/TNNI3K/CDC20/NRP2/SLITRK3/RAB17/LRFN3/SIX1/KLK8/KIF1A/LRRC4B/EPHB2/CAMK1/LRP4/EPHA7/DAB2IP/TLR2/ITPKA/ABI2/CLSTN3/AMIGO2/PPFIA2/NTRK3/ST8SIA2/SNCA/LRRTM2/GPM6A/SLC7A11/PTPRD/WNT7A/EPHB1/LRFN2/LRP8/CLSTN2/CHRNB2/LRRTM1/PDLIM5/CAMKV/CDK5/LRFN5/TU…	99	0.473684
GO:0051145	BP	GO:0051145	smooth muscle cell differentiation	42/6492	74/18903	6.33909e-05	0.00160814	0.00121182	PRDM6/FGF10/NFATC3/ITGA8/MEF2C/SIRT1/PDGFB/NFATC4/NFATC2/FGF9/FOXF1/OLFM2/COMP/SOD2/QKI/SRF/TBX18/HES1/TBX2/EREG/SOX9/SIX1/DNMT1/NFATC1/RAMP2/HEY2/EDNRB/MYOCD/GATA6/ZEB1/PDCD4/EDNRA/KIT/SGCB/HEY1/SHH/GPER1/MESP1/RBPMS2/MECP2/EFEMP2/FOXO4	42	0.567568
GO:0000727	BP	GO:0000727	double-strand break repair via break-induced replication	11/6492	12/18903	6.41383e-05	0.00162074	0.00122132	MCM2/MCM6/CDC45/CDC7/MCM5/MCM4/MCM3/GINS2/GINS4/MCM7/MCMDC2	11	0.916667
GO:0001508	BP	GO:0001508	action potential	73/6492	146/18903	6.66601e-05	0.00167791	0.0012644	ATP1A2/DSG2/KCNH2/PKP2/KCNN2/NRCAM/HCN2/CACNA1I/SNTA1/SCN1B/CAV1/P2RX1/CNTNAP1/KCNA1/TBX18/NUP155/TACR1/SLC8A2/ADRA1A/KCNJ8/FGF13/KCNA5/TRPM4/MTNR1B/DSC2/P2RX4/SCN7A/BIN1/CHRNA1/HCN4/HCN3/CAMK2D/ANK2/SCN2B/CACNA1C/AKAP6/KCNE4/GPD1L/CACNA2D1/CXADR/GNA14/GNAQ/RNF207/KCNB1/CHRNB2/KCNJ3/SLMAP/GRIK2/GPER1/CACNB2/SCN3B/CACNB3/SCN11A/KCNMB3/KCND3/KCNH6/SCN4B/KCNA2/GPR35/CACNB4/GJC1/SLC8A1/CTNNA3/KCND2/K…	73	0.5
GO:2001257	BP	GO:2001257	regulation of cation channel activity	94/6492	197/18903	6.7851e-05	0.00170127	0.001282	ABCC8/MAPK8IP2/EHD3/KCNG1/RASGRF1/CACNB1/ABCC9/GAL/GNB5/CACNG4/ACTN2/MEF2C/REM1/FKBP1A/JPH4/TREM2/HCN2/MMP9/CAV1/PPP3CB/CCL2/KCNA1/IFNG/PDE4D/CASQ2/PKD2/PPP3CC/KCNS1/AHNAK/OPRL1/FGF13/EPO/HRC/EPHB2/GRP/MTNR1B/HCN4/HCN3/STAC/CAMK2D/ANK2/CRHBP/CRH/STOM/JPH2/ITGB1/AKAP6/EDNRA/KCNE4/CACNA2D1/JPH3/CLIC2/KCNS2/CABP1/RNF207/PINK1/IFNGR2/FGF11/SLMAP/CDK5/GEM/CACNB2/NETO1/STIM1/JSRP1/CACNB3/GSG1L/ADRB2/KC…	94	0.477157
GO:1902850	BP	GO:1902850	microtubule cytoskeleton organization involved in mitosis	80/6492	163/18903	6.98377e-05	0.00174432	0.00131444	PAFAH1B1/PKD1/TACC3/SPDL1/MAP4/EML1/FGF10/FBXW11/CLASP1/WDR62/NDC80/AURKA/TPX2/BIRC5/KIF4A/MYBL2/RAE1/DCTN6/ARHGEF10/AURKC/FSD1/TTK/CENPA/CHMP3/WRAP73/CDC20/STMN1/NEK2/GPSM2/STIL/FAM110A/SBDS/DLGAP5/GNAI1/TUBG1/CCNB1/PSRC1/CDCA8/ESPL1/BORA/SPRY2/NUSAP1/KIF23/KIF11/TACC2/CENPE/NUF2/ANKRD53/CHMP7/TACC1/INCENP/ITGB1/SPC25/CENPH/CCSAP/SASS6/RACGAP1/SPICE1/KIF15/SPRY1/MAD2L1/CHMP4C/NDEL1/PLK1/KIFC2/ME…	80	0.490798
GO:0048167	BP	GO:0048167	regulation of synaptic plasticity	98/6492	207/18903	7.04088e-05	0.00175182	0.00132009	CX3CL1/SYT7/CYP46A1/RASGRF1/CAMK2B/PRKCZ/CAMK2A/PTGS2/RIMS1/SCTR/MEF2C/ERC1/JPH4/ITPR3/ABL1/PICK1/SLC8A3/NFATC4/CHRDL1/CBLN1/ZDHHC2/CALB1/GRIN2D/PPP3CB/CPEB3/NEURL1/KAT2A/MPP2/SLC38A1/NR2E1/SRF/RAB3GAP1/EPHA4/RIMS3/CDC20/KMT2A/SLC8A2/TSHZ3/EGR2/GIPC1/VGF/MAP1B/RARA/EPHB2/STXBP1/UNC13C/ITPKA/CNTN4/IGSF11/SNCA/CPLX2/LRRTM2/EIF4EBP2/JPH3/GRIA1/SLC24A2/SORCS3/NPTN/KIT/KCNB1/GIP/S100B/SQSTM1/NCSTN/LRR…	98	0.47343
GO:0010463	BP	GO:0010463	mesenchymal cell proliferation	27/6492	42/18903	7.08569e-05	0.00175622	0.00132341	CHRD/FGF9/FOXF1/WNT2/BMPR1A/STAT1/TBX2/SOX9/BMP2/SIX1/KDR/MYC/FGF7/OSR1/NFIB/ZEB1/LMNA/MSX1/IHH/TGFBR2/HAND2/SHH/DCHS1/SHOX2/CTNNBIP1/TBX1/DCHS2	27	0.642857
GO:0001570	BP	GO:0001570	vasculogenesis	45/6492	81/18903	7.15642e-05	0.00176698	0.00133151	ASB4/CUL7/TIE1/TGFBR3/TBX5/FOXF1/CAV1/HOXA13/QKI/RAP1A/RRAS/KDR/TNNI3/RAMP2/MYO18B/HEY2/YAP1/MYOCD/EPHA2/ACKR3/WNT7A/PAXIP1/XDH/TGFBR2/TIPARP/CITED2/TBX20/HEY1/SHH/SOX17/SPRED1/SGPL1/TMEM100/ZFPM2/JUNB/EGFL7/HEG1/CD34/FZD4/GLMN/GJC1/NKX2-5/WT1/ZFP36L1/APELA	45	0.555556
GO:0051302	BP	GO:0051302	regulation of cell division	91/6492	190/18903	7.39659e-05	0.00181665	0.00136894	KLHL13/CUL3/ASPM/TP63/RBL1/CDC14B/AURKA/BIRC5/ORC6/CDC6/SUSD2/PDGFB/CDC25B/FGF9/RBL2/TLE6/AURKC/FSD1/FGF8/GIT1/KAT2A/MDK/FGF6/KIF20A/ECT2/IL1A/CHMP3/KIF14/PGF/TGFB3/CAT/CIT/GIPC1/EREG/E2F8/RAB11FIP4/CDCA8/SMYD5/HTR2B/MYC/KIF13A/KIF23/KIF20B/FGF5/FGF2/BRCA2/FGF7/PRDM15/PLK4/ANKRD53/SFRP2/PDGFC/INCENP/RACGAP1/TAL1/KLHL21/TGFA/YEATS2/SHH/CHMP4C/SOX17/E2F7/ZFYVE19/PLK1/IGF2/CDK2AP2/DCDC1/PDGFD/PRKCE/…	91	0.478947
GO:0006813	BP	GO:0006813	potassium ion transport	114/6492	247/18903	7.44183e-05	0.00181665	0.00136894	ABCC8/ATP1A2/FHL1/KCNG1/KCNH2/WNK1/SLC9A7/ABCC9/GAL/ATP12A/ACTN2/SLC1A3/KCNN2/KCNK2/KCNH4/TREM2/KCNK6/HCN2/NALCN/HTR2A/KCNA7/SLC17A7/ATP1A3/ATP4A/HPN/CAV1/PKD2L1/KCNA1/SLC12A7/KCNIP3/KCNJ13/KCNQ4/CASQ2/PKD2/KCNJ8/CDK2/KCNS1/SLC12A5/KCNK17/WNK4/ATP1B2/KCNA5/DPP6/KCNC3/GRP/MTNR1B/SLC9A5/BIN1/HCN4/SLC24A4/KCNN3/HCN3/ANK2/KCNMB1/VIP/SLC12A9/ITGB1/FXYD4/ADRA2A/AKAP6/KCNE4/KCNK13/SLC24A2/KCNMA1/KCNS2/K…	114	0.461538
GO:0051259	BP	GO:0051259	protein complex oligomerization	114/6492	247/18903	7.44183e-05	0.00181665	0.00136894	PKD1/EHD3/KCNG1/POLQ/ME1/TP63/ACACB/TP73/TRPM3/NLRP1/SAMHD1/RS1/PYCARD/TRPA1/GSDMD/KCTD9/KCNA7/COMP/PKD2L1/MPP2/KCTD10/PRMT8/KCNA1/CPSF6/SOD2/ACOT13/C9/ECT2/PKD2/TRPM6/CUTC/IKZF4/KCNS1/CLYBL/KIF25/PRMT1/TRPV5/STEAP4/RNF112/KCNA5/PXDN/TRPM4/KCNC3/MIP/KCTD3/PNPT1/CRTC3/SAMD1/TRPM2/BCL10/ALDH9A1/AQP10/SNCA/GLRA3/SIGMAR1/ALAD/NACC2/ROM1/MAT1A/KCTD14/TDO2/KCTD15/GBP5/KCTD18/KCNS2/KCNB1/SHKBP1/CRTC2/CL…	114	0.461538
GO:0033260	BP	GO:0033260	nuclear DNA replication	25/6492	38/18903	7.47474e-05	0.00181782	0.00136983	DBF4/RAD51/MCM2/TIPIN/MCM6/ATRX/CDC45/CDC7/GINS1/MCM4/LIG1/MCM3/GMNN/BCL6/PCNA/DNA2/BRCA2/DONSON/DBF4B/CDT1/FEN1/ATAD5/GINS3/BLM/DACH1	25	0.657895
GO:0060323	BP	GO:0060323	head morphogenesis	24/6492	36/18903	7.56611e-05	0.00183315	0.00138138	MMP2/CRISPLD2/DLX5/DKK1/WNT3/MYH3/RAB3GAP1/TGFB3/RRAS/PDGFRA/STRA6/CSRNP1/ARID5B/SSBP3/SKI/FLVCR1/MSX1/IHH/TIPARP/SGPL1/PTPN11/TBX1/CLDN5/SCX	24	0.666667
GO:0061333	BP	GO:0061333	renal tubule morphogenesis	44/6492	79/18903	7.91014e-05	0.00190935	0.0014388	SOX8/PKD1/PAX2/MEF2C/SIX4/SALL1/EYA1/GATA3/FGF8/HES1/WNT6/TCF21/PKD2/SOX9/PAX8/BMP2/WNK4/SIX1/WNT2B/MYC/FGF2/LGR5/GREB1L/SMAD4/OSR1/ADAMTS16/HS3ST3A1/KIF26B/SHH/ILK/DCHS1/GREM1/GDNF/MTSS1/BCL2/CTNNBIP1/MAGED1/WT1/PBX1/PTCH1/HES5/FOXD1/HOXB7/LHX1	44	0.556962
GO:0050767	BP	GO:0050767	regulation of neurogenesis	165/6492	377/18903	7.97798e-05	0.00191857	0.00144575	SEMA3F/KDM1A/SOX8/ABCC8/CX3CL1/PAFAH1B1/SS18L2/SEMA3G/CDH1/RTN4R/CUL7/CAMK2B/NTN1/ASPM/HES2/SEMA3A/WDR62/PLXNA2/PCM1/TP73/DCT/RAB21/LRP2/SMARCD3/ULK2/DNAJB11/DLL3/SEMA4G/TREM2/NFATC4/E2F1/FBXO31/EEF2K/NUMBL/PTPRS/MEGF8/MAG/WNT2/EZH2/LIMK1/LHX2/CXCL12/BMPR1A/PITX3/NEURL1/WNT3/ASPA/RND2/MDK/IFNG/NR2E1/SRF/HES1/PLXNA1/TLX2/ID2/DLX2/EPHA4/PROX1/SPP1/HOXB3/CXCR4/EGR2/NKX2-2/BMP2/MACF1/LIF/RNF112/FEZF1…	165	0.437666
GO:0050803	BP	GO:0050803	regulation of synapse structure or activity	101/6492	215/18903	8.04889e-05	0.00192846	0.00145319	SEMA3F/MYCBP2/PAFAH1B1/FYN/MUSK/CAMK2B/NTN1/CTNNA2/CTTNBP2/MEF2C/IGSF9/NRCAM/TREM2/ABL1/SIX4/NFATC4/ZDHHC15/CBLN1/EEF2K/SLC17A7/DMPK/NEURL1/DKK1/NEDD9/TANC1/EPHA4/TNNI3K/CDC20/NRP2/SLITRK3/RAB17/LRFN3/SIX1/KLK8/KIF1A/LRRC4B/EPHB2/CAMK1/LRP4/EPHA7/DAB2IP/TLR2/ITPKA/ABI2/CLSTN3/AMIGO2/PPFIA2/NTRK3/ST8SIA2/SNCA/LRRTM2/GPM6A/SLC7A11/PTPRD/WNT7A/EPHB1/LRFN2/LRP8/CLSTN2/CHRNB2/LRRTM1/PDLIM5/CAMKV/CDK5/…	101	0.469767
GO:0099173	BP	GO:0099173	postsynapse organization	81/6492	166/18903	8.1335e-05	0.00194154	0.00146305	SEMA3F/ITGA3/PAFAH1B1/FYN/MUSK/CAMK2B/ACTN1/ACTB/OPHN1/NRCAM/TREM2/PICK1/CHRDL1/ZDHHC15/CBLN1/EEF2K/ZDHHC2/CNTNAP1/NRXN2/NEDD9/TANC1/EPHA4/TNNI3K/NRP2/SLITRK3/LRRC4/KIF1A/ARHGEF9/LRRC4B/EPHB2/LRP4/EPHA7/ITPKA/ADAM10/ZNF365/ABI2/PPFIA2/NTRK3/TMEM108/LRRTM2/ARHGAP39/INA/CNKSR2/SLC7A11/PTPRD/WNT7A/EPHB1/LRFN2/LRP8/WASF2/ZDHHC12/PDLIM5/CDK5/RAPSN/GDNF/ACTBL2/EFNA1/IL1RAPL1/NLGN1/CHRNB1/TANC2/NPTX1/PT…	81	0.487952
GO:0051402	BP	GO:0051402	neuron apoptotic process	117/6492	255/18903	8.22556e-05	0.00195523	0.00147337	CX3CL1/TFAP2B/BID/GCLM/HSPA5/ERBB3/ROCK1/POLB/TP63/SNCB/MEF2C/BAX/NLRP1/TYRO3/MSH2/TREM2/JAK2/ABL1/CDC34/HMOX1/SIX4/NFATC4/MYBL2/TOX3/MAG/GRIK5/CASP2/GATA3/UNC5B/FGF8/PITX3/CCL2/WFS1/TRIM2/PPARGC1A/CCND1/MDK/GAPDH/SOD2/NR3C1/CPEB4/LANCL1/KIF14/FOXO3/TGFB3/CIT/GRM4/SIX1/KDR/NES/VSTM2L/CASP9/NGF/IL6ST/MTNR1B/EPHA7/AGAP2/FAIM2/STXBP1/TFAP2A/HDGF/MCL1/DLX1/SNCA/SIGMAR1/ATM/HYOU1/ADAM8/POU4F1/BCL2L11/…	117	0.458824
GO:0071695	BP	GO:0071695	anatomical structure maturation	115/6492	250/18903	8.2513e-05	0.00195523	0.00147337	KDM1A/SOX8/CX3CL1/IGF1/MYOC/NSUN2/CDH3/ROPN1/CBFB/IFT80/GAL/CNGB1/EPHA8/RPS6KA2/TRIP13/SCARF1/PAX2/PGR/AKR1B1/SNX10/MMP2/AURKA/NRCAM/SLC26A3/PICK1/VSX1/TRPC4AP/CDC25B/FERMT1/XYLT1/ERCC2/GHRHR/LHX6/GATA3/ZBTB16/FBXO5/CCR6/HES1/PCSK4/KIF14/FOXO3/PAEP/RECK/SEMG2/SEMG1/RUNX2/EREG/C3/BMP2/KLF2/KDR/EPO/SPINK5/EDNRB/ADAMTS7/SIX3/ACVRL1/BRCA2/SLC24A4/RERE/EBP/ADAMTS12/EDNRA/NR4A2/LGI4/KCNB1/B4GALT5/NPR2/…	115	0.46
GO:0035107	BP	GO:0035107	appendage morphogenesis	71/6492	142/18903	8.32795e-05	0.00195904	0.00147624	DLX6/TFAP2B/MKS1/BAK1/PITX1/FGF10/TP63/PLXNA2/RARB/GRHL2/ATRX/BAX/TBX5/PCSK5/SALL4/FGF9/SALL1/MEGF8/DLX5/HOXA13/BMPR1A/FGF8/DKK1/WNT3/B9D1/MYH3/ZBTB16/TBX2/TBX4/RECK/HOXC11/SOX4/RUNX2/SOX9/NOTCH2/LRP4/TFAP2A/FRAS1/FBN2/COL2A1/SMAD4/OSR1/AFF3/SFRP2/RSPO2/FREM2/CACNA1C/MBNL1/BCL2L11/WNT7A/SKI/FLVCR1/PKDCC/EN1/MSX1/IHH/HAND2/SP8/SHH/FZD6/GREM1/SHOX2/CHST11/CHD7/EVX2/SOX11/TMEM107/HOXC10/PBX1/PTCH1/D…	71	0.5
GO:0035108	BP	GO:0035108	limb morphogenesis	71/6492	142/18903	8.32795e-05	0.00195904	0.00147624	DLX6/TFAP2B/MKS1/BAK1/PITX1/FGF10/TP63/PLXNA2/RARB/GRHL2/ATRX/BAX/TBX5/PCSK5/SALL4/FGF9/SALL1/MEGF8/DLX5/HOXA13/BMPR1A/FGF8/DKK1/WNT3/B9D1/MYH3/ZBTB16/TBX2/TBX4/RECK/HOXC11/SOX4/RUNX2/SOX9/NOTCH2/LRP4/TFAP2A/FRAS1/FBN2/COL2A1/SMAD4/OSR1/AFF3/SFRP2/RSPO2/FREM2/CACNA1C/MBNL1/BCL2L11/WNT7A/SKI/FLVCR1/PKDCC/EN1/MSX1/IHH/HAND2/SP8/SHH/FZD6/GREM1/SHOX2/CHST11/CHD7/EVX2/SOX11/TMEM107/HOXC10/PBX1/PTCH1/D…	71	0.5
GO:0001823	BP	GO:0001823	mesonephros development	54/6492	102/18903	8.44828e-05	0.00198014	0.00149214	SOX8/PKD1/FGF10/PAX2/RARB/ARG2/SIX4/SMAD7/SALL1/EYA1/CALB1/SFRP1/GATA3/FGF8/ZBTB16/SIM1/HES1/WNT6/TCF21/PKD2/EPCAM/CAT/SOX9/PAX8/BMP2/SIX1/FOXJ1/RARA/WNT2B/MYC/FGF2/GREB1L/SMAD4/OSR1/SLIT2/ADAMTS16/HS3ST3A1/KIF26B/SPRY1/BMPER/SHH/ILK/DCHS1/GREM1/GDNF/BCL2/CTNNBIP1/MAGED1/WT1/PBX1/PTCH1/FOXD1/HOXB7/LHX1	54	0.529412
GO:0072088	BP	GO:0072088	nephron epithelium morphogenesis	43/6492	77/18903	8.73873e-05	0.00204082	0.00153787	SOX8/PKD1/PAX2/SIX4/SALL1/EYA1/GATA3/FGF8/HES1/STAT1/WNT6/TCF21/PKD2/SOX9/PAX8/BMP2/WNK4/SIX1/LIF/WNT2B/MYC/FGF2/GREB1L/SMAD4/OSR1/ADAMTS16/HS3ST3A1/KIF26B/SHH/ILK/DCHS1/GREM1/GDNF/BCL2/CTNNBIP1/MAGED1/WT1/PBX1/PTCH1/HES5/FOXD1/HOXB7/LHX1	43	0.558442
GO:0035296	BP	GO:0035296	regulation of tube diameter	73/6492	147/18903	8.82785e-05	0.00204686	0.00154242	PIK3C2A/ATP1A2/GCLM/ROCK1/PTGS2/MMP2/ABL1/SNTA1/HTR2A/COMP/CAV1/PLOD3/ACTA2/P2RX1/SOD3/SOD2/NPR3/KNG1/TACR1/RGS2/FAAH/ADRA1A/BBS2/AVPR2/KLF2/KCNA5/TRPM4/PER2/CRP/CHRM3/NTS/ROCK2/MTNR1B/HTR1B/HTR2B/EDNRB/AGTR1/KCNMB1/ADRA2A/EDNRA/KCNMA1/CBS/ADORA1/UCN/GPER1/NOS3/VSTM4/AVPR1A/BDKRB2/ADRB2/NPR1/DRD5/P2RY1/FGG/FGA/FGB/ADRA1D/CYSLTR1/HTR1D/OXTR/F2R/SLC8A1/PRKG1/SMTNL2/ADRB3/UTS2B/BMPR2/ITGA1/SMTNL1/GP…	73	0.496599
GO:0097746	BP	GO:0097746	blood vessel diameter maintenance	73/6492	147/18903	8.82785e-05	0.00204686	0.00154242	PIK3C2A/ATP1A2/GCLM/ROCK1/PTGS2/MMP2/ABL1/SNTA1/HTR2A/COMP/CAV1/PLOD3/ACTA2/P2RX1/SOD3/SOD2/NPR3/KNG1/TACR1/RGS2/FAAH/ADRA1A/BBS2/AVPR2/KLF2/KCNA5/TRPM4/PER2/CRP/CHRM3/NTS/ROCK2/MTNR1B/HTR1B/HTR2B/EDNRB/AGTR1/KCNMB1/ADRA2A/EDNRA/KCNMA1/CBS/ADORA1/UCN/GPER1/NOS3/VSTM4/AVPR1A/BDKRB2/ADRB2/NPR1/DRD5/P2RY1/FGG/FGA/FGB/ADRA1D/CYSLTR1/HTR1D/OXTR/F2R/SLC8A1/PRKG1/SMTNL2/ADRB3/UTS2B/BMPR2/ITGA1/SMTNL1/GP…	73	0.496599
GO:0071375	BP	GO:0071375	cellular response to peptide hormone stimulus	137/6492	306/18903	8.98798e-05	0.00207654	0.00156479	PDK4/PDK2/PIK3C2A/CYBA/GLP2R/PKM/PRKCZ/ROCK1/CAMK2A/SREBF1/ACTN2/NCOA1/SNX5/CDC6/SORBS1/SIRT1/JAK2/PNPLA3/RANGAP1/SRSF5/PCK2/TRIB3/EEF2K/ZNF106/CA2/SLC39A14/TYK2/FGF21/PIK3R2/CAV1/GRB10/GHRHR/KANK1/HDAC5/NFKB1/GAB1/TNS2/GLP1R/GHR/KAT2B/GRB14/STAT1/NFE2L2/ERRFI1/NR4A3/RHOQ/SOCS2/INHBA/DNAI1/NR4A1/STAT5A/MAS1/MAP1B/LPIN3/MEN1/ROCK2/LPIN1/APC/CDK4/BRIP1/SLC2A8/DENND4C/CPEB2/MGARP/LHCGR/CYP1B1/CYP11A…	137	0.447712
GO:0032956	BP	GO:0032956	regulation of actin cytoskeleton organization	160/6492	365/18903	9.21983e-05	0.00212253	0.00159944	CX3CL1/TMSB10/MYOC/CAPG/EPHA3/GPM6B/ARHGAP6/ELN/CYFIP2/NCKAP1/CTNNA2/ROCK1/PFN2/SPTB/FERMT2/CLASP1/ADD2/FSCN1/ACTN2/RAPGEF3/ADD1/ARHGAP28/MYO3A/ABL1/SH3BP1/PICK1/RGCC/PYCARD/CORO2B/TJP1/SFRP1/ARHGEF10/PIK3R2/MET/LIMK1/KANK1/CXCL12/CSF3/RND2/MDK/ARPC3/NEDD9/WASF1/HRG/ECT2/IL1A/SPTBN1/TACR1/RND3/STMN1/PROX1/APOA1/TGFB3/RHOQ/TEK/SORBS3/CIT/NCKAP1L/LRP1/ARHGAP40/DSTN/VIL1/BAIAP2L2/CGNL1/TMOD2/BST2/SN…	160	0.438356
GO:0033045	BP	GO:0033045	regulation of sister chromatid segregation	56/6492	107/18903	9.52841e-05	0.00218579	0.00164711	MAD1L1/DPF1/TACC3/CUL3/SPDL1/SMARCD1/TRIP13/ACTB/SMARCA2/NDC80/SMARCD3/BIRC5/CDC6/SMARCB1/SMARCD2/FBXO5/TTK/KAT2B/MAD2L2/CDC20/CENPF/DUSP1/ZWINT/XRCC3/DLGAP5/SMARCA4/PHF10/CCNB1/CDCA8/APC/ESPL1/ACTL6A/CENPE/ANAPC11/NUF2/ATM/INCENP/SPC25/BUB3/BUB1B/SPC24/MAD2L1/PTTG1/PRAP1/PLK1/CDT1/BUB1/ZWILCH/UBE2C/RMI2/GEN1/AURKB/MAPK15/KNTC1/LCMT1/DPF3	56	0.523364
GO:0007052	BP	GO:0007052	mitotic spindle organization	67/6492	133/18903	9.74858e-05	0.00222839	0.00167921	PKD1/TACC3/MAP4/EML1/CLASP1/WDR62/NDC80/AURKA/TPX2/BIRC5/KIF4A/MYBL2/RAE1/DCTN6/ARHGEF10/AURKC/FSD1/TTK/CHMP3/WRAP73/CDC20/STMN1/NEK2/GPSM2/STIL/FAM110A/SBDS/DLGAP5/GNAI1/TUBG1/CCNB1/PSRC1/CDCA8/BORA/KIF23/KIF11/TACC2/CENPE/NUF2/ANKRD53/CHMP7/TACC1/INCENP/SPC25/CENPH/CCSAP/SASS6/RACGAP1/SPICE1/KIF15/CHMP4C/PLK1/KIFC2/MECP2/AURKB/RCC1/EFHC2/CHEK2/FLNA/PRC1/HSPA1B/DCTN1/MZT1/NUP62/KIF4B/KIFC1/CHMP1B	67	0.503759
GO:0014065	BP	GO:0014065	phosphatidylinositol 3-kinase signaling	72/6492	145/18903	9.86734e-05	0.00223984	0.00168784	WNT16/PIK3C2A/DCN/IGF1/HGF/MYOC/PREX2/LTK/ERBB3/MYDGF/FGFR1/TYRO3/TREM2/SIRT1/JAK2/PDGFB/PPP1R16B/HTR2A/MAZ/PIK3R2/PIP5K1B/GATA3/UNC5B/CRYBA1/CSF3/PTPN6/CD160/TEK/CAT/FLT3/SOX9/KDR/PDGFRA/PRR5L/HTR2B/DAB2IP/CEP55/FGF2/PIK3C2G/NTRK3/ERBB2/NYAP2/PDGFC/PIK3R1/INPP5E/ANGPT1/KIT/PLXNB1/GPER1/SERPINA12/NLRC3/IRS1/ROR2/SEMA3E/FSHR/PDGFD/PTEN/SELP/CD28/F2/F2R/ROR1/ZFP36L1/PIP5K1C/PEAR1/RELN/SRC/FCGR3A/LI…	72	0.496552
GO:2000241	BP	GO:2000241	regulation of reproductive process	97/6492	206/18903	9.86789e-05	0.00223984	0.00168784	IGF1/ASPM/RPS6KA2/TRIP13/TACR2/BAX/AURKA/ESR1/CDC25B/EPPIN/FGF9/SFRP1/AMH/SYDE1/LFNG/PTGDS/RAD51AP1/FBXO5/CCR6/TTK/IL1A/TACR1/CDC20/DUSP1/PAEP/INHBA/PRDX4/SEMG2/SNAI1/SEMG1/SOX9/PRDM7/LIF/RGN/TEX101/SERPINF1/EDNRB/STXBP1/NR5A1/DMRT1/GCM1/SULF1/PDE5A/SPATA22/ANAPC11/HORMAD1/VIP/STRA8/GNRH1/ZP1/DHX37/FBXO43/KIT/CDC25C/NPR2/INHBB/HPGDS/MSX1/PLB1/CDC25A/PRDM9/CITED2/SHH/METTL3/AR/BNC1/TACR3/P2RY1/ZFP…	97	0.470874
GO:0072163	BP	GO:0072163	mesonephric epithelium development	52/6492	98/18903	0.000104958	0.00236576	0.00178272	SOX8/PKD1/PAX2/RARB/ARG2/SIX4/SMAD7/SALL1/EYA1/CALB1/SFRP1/GATA3/FGF8/SIM1/HES1/WNT6/TCF21/PKD2/EPCAM/CAT/SOX9/PAX8/BMP2/SIX1/FOXJ1/RARA/WNT2B/MYC/FGF2/GREB1L/SMAD4/OSR1/SLIT2/ADAMTS16/HS3ST3A1/KIF26B/SPRY1/BMPER/SHH/ILK/DCHS1/GREM1/GDNF/BCL2/CTNNBIP1/MAGED1/WT1/PBX1/PTCH1/FOXD1/HOXB7/LHX1	52	0.530612
GO:0072164	BP	GO:0072164	mesonephric tubule development	52/6492	98/18903	0.000104958	0.00236576	0.00178272	SOX8/PKD1/PAX2/RARB/ARG2/SIX4/SMAD7/SALL1/EYA1/CALB1/SFRP1/GATA3/FGF8/SIM1/HES1/WNT6/TCF21/PKD2/EPCAM/CAT/SOX9/PAX8/BMP2/SIX1/FOXJ1/RARA/WNT2B/MYC/FGF2/GREB1L/SMAD4/OSR1/SLIT2/ADAMTS16/HS3ST3A1/KIF26B/SPRY1/BMPER/SHH/ILK/DCHS1/GREM1/GDNF/BCL2/CTNNBIP1/MAGED1/WT1/PBX1/PTCH1/FOXD1/HOXB7/LHX1	52	0.530612
GO:0006874	BP	GO:0006874	cellular calcium ion homeostasis	128/6492	284/18903	0.000105327	0.00236583	0.00178278	CX3CL1/ATP2C1/ATP1A2/BAK1/MCUR1/CYBA/MCOLN3/ATP2B4/ATP2C2/ATP2B3/ATP2A3/BAX/FKBP1A/P2RX7/SLC8B1/JPH4/ITPR3/ABL1/SLC8A3/BDKRB1/HTR2A/CEMIP/TRPA1/CALB1/DMPK/ATP13A1/CAV1/CXCL12/P2RX1/CCL7/WFS1/TCIRG1/PTPN6/PDE4D/SLC8A2/CASQ2/PKD2/SLC25A23/ATP13A4/TNNI3/HRC/RGN/TRPC4/TPT1/TMEM165/HTR1B/HTR2B/TRPC6/LHCGR/FGF2/TRPC3/CXCL9/METTL21C/SLC24A4/PML/TRPM2/SYPL2/XCL1/TRPM8/TRPC1/SNCA/CAMK2D/ANK2/HTR2C/JPH2/IT…	128	0.450704
GO:0000070	BP	GO:0000070	mitotic sister chromatid segregation	96/6492	204/18903	0.000109895	0.0024599	0.00185367	MAD1L1/NCAPD2/DPF1/TACC3/CUL3/SPDL1/SMARCD1/TRIP13/ACTB/SPAG5/KIF22/SMARCA2/NDC80/SMARCD3/ATRX/BIRC5/KIF4A/CDC6/SMARCB1/NAA10/AURKC/SMARCD2/NCAPG/FBXO5/TTK/SMC4/KAT2B/CHMP3/WRAP73/MAD2L2/CDC20/NEK2/CENPF/KIF14/DUSP1/NCAPH/KIF18A/ZWINT/CENPK/KIF25/XRCC3/DLGAP5/SMARCA4/KNSTRN/PHF10/TUBG1/CCNB1/PSRC1/CDCA8/APC/ESPL1/ACTL6A/SMC2/DSCC1/NUSAP1/KIF23/KIF11/CENPE/KATNB1/ANAPC11/KIF2C/NUF2/ANKRD53/CDCA5/N…	96	0.470588
GO:0051017	BP	GO:0051017	actin filament bundle assembly	78/6492	160/18903	0.000113354	0.00252858	0.00190542	CX3CL1/MYOC/CUL3/ARHGAP6/ELN/ROCK1/PFN2/ACTN1/FERMT2/CLASP1/ADD2/FSCN1/RAPGEF3/ADD1/ARHGAP28/EZR/SORBS1/ABL1/RGCC/CORO2B/TJP1/SFRP1/ARHGEF10/PIK3R2/MET/FSCN3/LIMK1/NEDD9/PHACTR1/SRF/DPYSL3/TACR1/STMN1/APOA1/TGFB3/SORBS3/CALD1/AIF1L/VIL1/BAIAP2L2/MYO1B/CGNL1/SWAP70/SPIRE1/ROCK2/MICAL1/FHOD1/FHDC1/ARRB1/TPM1/TMEFF2/PHLDB2/PIK3R1/FAM171A1/EPS8/RHPN1/WASF2/F11R/ZYX/DLC1/HSP90B1/FAM107A/MTSS1/S1PR1/PT…	78	0.4875
GO:0072160	BP	GO:0072160	nephron tubule epithelial cell differentiation	12/6492	14/18903	0.000113806	0.00252993	0.00190644	WWTR1/PAX2/MEF2C/GATA3/STAT1/PAX8/LIF/YAP1/OSR1/MTSS1/CD24/LHX1	12	0.857143
GO:0035150	BP	GO:0035150	regulation of tube size	73/6492	148/18903	0.000116149	0.00256332	0.0019316	PIK3C2A/ATP1A2/GCLM/ROCK1/PTGS2/MMP2/ABL1/SNTA1/HTR2A/COMP/CAV1/PLOD3/ACTA2/P2RX1/SOD3/SOD2/NPR3/KNG1/TACR1/RGS2/FAAH/ADRA1A/BBS2/AVPR2/KLF2/KCNA5/TRPM4/PER2/CRP/CHRM3/NTS/ROCK2/MTNR1B/HTR1B/HTR2B/EDNRB/AGTR1/KCNMB1/ADRA2A/EDNRA/KCNMA1/CBS/ADORA1/UCN/GPER1/NOS3/VSTM4/AVPR1A/BDKRB2/ADRB2/NPR1/DRD5/P2RY1/FGG/FGA/FGB/ADRA1D/CYSLTR1/HTR1D/OXTR/F2R/SLC8A1/PRKG1/SMTNL2/ADRB3/UTS2B/BMPR2/ITGA1/SMTNL1/GP…	73	0.493243
GO:0021782	BP	GO:0021782	glial cell development	60/6492	117/18903	0.000116423	0.00256332	0.0019316	CNTN1/VIM/MYOC/LAMC3/TREM2/PICK1/FA2H/ARHGEF10/ERCC2/PRX/MAG/ASPA/CNTNAP1/MDK/IFNG/CSPG5/CLU/LRP1/PLP1/SOX4/MYRF/NKX2-2/LDLR/NSUN5/ANO1/ITGB4/WASF3/TSPAN2/IL6/TLR4/TLR2/S100A8/TTBK1/PARD3/TENM4/PRDM8/LGI4/SKI/B4GALT5/NCSTN/SHH/CDK5/ILK/ROR2/SH3TC2/TPPP/PTEN/LAMB2/ID4/NRROS/SOX11/KCNJ10/CNTN2/ROR1/MAPT/HES5/LPAR1/AGER/LYN/ZNF488	60	0.512821
GO:0045165	BP	GO:0045165	cell fate commitment	127/6492	282/18903	0.000116534	0.00256332	0.0019316	WNT16/ARX/SOX8/TEAD3/PRDM1/DMRT3/CDON/PITX1/FGF10/TCF3/GLI2/NOTCH3/WNT8B/PAX2/MEF2C/TBX5/TBX15/GATA1/EYA1/SFRP1/ESRP1/WNT2/HOXA13/LHX3/GATA3/BMPR1A/FGF8/DKK1/WNT3/SOX6/IL23A/NR2E1/TBX18/HES1/WNT6/ID2/DLX2/PTCH2/PROX1/ONECUT2/TBX2/TBX4/LY9/RUNX2/SOX9/FOXA2/NKX2-2/BMP2/SIX1/KDR/MYOD1/FGF13/MNX1/GATA5/RARA/KDM6B/WNT2B/NOTCH2/SOX5/APC/HEY2/SPRY2/IL6/NKX2-1/TBR1/KLF4/IRF4/GCM1/LBX1/FGF2/FOXN4/DHH/PML/…	127	0.450355
GO:0031960	BP	GO:0031960	response to corticosteroid	80/6492	165/18903	0.000117514	0.00256332	0.0019316	CALCR/CYBA/PTPRU/MAOB/PTGS2/TFAP4/JAK2/PCK2/ACSBG1/GHRHR/PTGDS/AREG/CCND1/MDK/GHR/NR3C1/BCHE/IGFBP2/ERRFI1/SGK1/FOXO3/KLF9/FLT3/FOSB/ZFP36/MYOD1/CDO1/EPO/SERPINF1/PCNA/CASP9/ANXA1/HTR1B/IL6/IL1RN/CYP1B1/PDX1/METTL21C/NTRK3/CNGA3/SLIT2/SRD5A1/PAM/ALAD/ZFP36L2/BCL2L11/PPARGC1B/FBXO32/TRIM63/PFKFB1/APOA2/STC1/AGL/CLDN1/IGFBP7/UCN/GPER1/GJB2/AVPR1A/SCNN1G/DDIT4/FAM107A/GLB1/FOS/BCL2/NPAS4/FOSL1/A2M/H…	80	0.484848
GO:0014068	BP	GO:0014068	positive regulation of phosphatidylinositol 3-kinase signaling	44/6492	80/18903	0.000117685	0.00256332	0.0019316	WNT16/DCN/IGF1/HGF/MYOC/ERBB3/MYDGF/FGFR1/TREM2/SIRT1/JAK2/PDGFB/MAZ/UNC5B/CSF3/PTPN6/TEK/CAT/FLT3/SOX9/KDR/PDGFRA/PRR5L/FGF2/NTRK3/PDGFC/ANGPT1/KIT/PLXNB1/GPER1/SERPINA12/ROR2/SEMA3E/FSHR/PDGFD/SELP/CD28/F2/F2R/ROR1/RELN/SRC/INS/GH1	44	0.55
GO:0048644	BP	GO:0048644	muscle organ morphogenesis	44/6492	80/18903	0.000117685	0.00256332	0.0019316	PKP2/COL11A1/MYLK/TGFBR3/LRP2/FKBP1A/MYLK2/SMAD7/WNT2/BMPR1A/HAND1/TNNC1/PROX1/TNNT2/BMP2/TCF15/LIF/TNNI3/HEY2/TPM1/SMAD4/ANKRD1/ARID5B/EDNRA/POU4F1/TNNI1/ACTC1/MYL3/FOXH1/TBX20/SHOX2/ZFPM2/S1PR1/CHD7/EFEMP2/HEG1/TCAP/ZFPM1/FZD2/NKX2-5/TBX1/ADARB1/RYR2/SMTNL1	44	0.55
GO:0048144	BP	GO:0048144	fibroblast proliferation	54/6492	103/18903	0.000118674	0.00257617	0.00194128	IGF1/B4GALT7/FGF10/DAZAP1/FOSL2/SIRT6/BAX/ESR1/CDC6/ABL1/PDGFB/E2F1/SFRP1/MED25/CAV1/WNT2/KAT2A/SOD2/KMT2A/CKS2/CDKN1A/EREG/LIF/E2F8/CCNB1/PDGFRA/CDK4/DAB2IP/MYC/PML/CCNA2/PDGFC/SKI/DDR2/NLRC3/IL13/CDK1/PDGFD/CKS1B/HRAS/CD248/SPHK1/JUN/PARP10/CTC1/GAS6/GNG2/C1QL4/S100A6/GPX1/AQP1/MIF/ITGB3/DACH1	54	0.524272
GO:0071900	BP	GO:0071900	regulation of protein serine/threonine kinase activity	171/6492	395/18903	0.000119377	0.00258278	0.00194626	PRKAR2B/DBF4/PKD1/KITLG/ATP2B4/LRP6/FERMT2/ACTB/FGFR1/MEF2C/P2RX7/IRAK3/TFAP4/CDC6/SIRT1/ABL1/PDGFB/CDKN3/SLC8A3/TCL1A/TELO2/TRIB3/CDK5RAP1/CD40LG/HTR2A/RGCC/PYCARD/CEMIP/SFRP1/PIH1D1/CCNE1/CAV1/EZH2/PRKAG2/BMPR1A/DKK1/CDK5RAP3/PRKAR1A/CCND1/HIPK3/IFNG/PTPN6/TPD52L1/SASH1/GHR/CCNG1/KAT2B/PDCD10/PRKAR2A/EPHA4/GADD45A/RGS2/PROX1/SLC8A2/TNFAIP3/PKD2/CCNI/CCND2/DUSP1/TNFSF11/MAPK8IP1/FLT3/CKS2/CDKN1A…	171	0.432911
GO:0031570	BP	GO:0031570	DNA integrity checkpoint signaling	65/6492	129/18903	0.000121847	0.00261869	0.00197332	CRY1/BRCA1/RAD51/FOXN3/TIPIN/GTSE1/THOC1/CDC14B/ORC1/WDR76/CLSPN/CDC45/CDC6/MSH2/TELO2/TTI1/E2F1/FBXO31/CASP2/CDK5RAP3/CCND1/TIMELESS/CCNG1/FBXO6/CDK2/CDKN1A/STK33/CLOCK/MDM2/BRIP1/DNA2/BRCA2/PML/TICRR/DTL/INTS7/FANCD2/ATM/CHEK1/EME1/DONSON/TOPBP1/ATRIP/PRAP1/PLK1/CDT1/PBK/RFWD3/FEM1B/CRADD/CDK1/TRIAP1/RHNO1/RAD9A/PLK3/PIDD1/PTPN11/CHEK2/FOXO4/MUC1/BLM/EME2/DDX39B/GIGYF2/PRKDC	65	0.503876
GO:0051928	BP	GO:0051928	positive regulation of calcium ion transport	65/6492	129/18903	0.000121847	0.00261869	0.00197332	CALCR/CX3CL1/EHD3/BAK1/SPHK2/ATP2C2/MYLK/CAMK2A/ADCYAP1R1/BAX/P2RX7/ABL1/PDGFB/BDKRB1/CEMIP/CAV1/CXCL12/PPP3CB/P2RX1/CCL2/WFS1/PKD2/PPP3CC/RAMP3/PLP1/HSPA2/MCHR1/RGN/P2RX4/TRPC6/LHCGR/TRPC3/CXCL9/XCL1/STAC/TRPC1/SNCA/ANK2/CASK/JPH2/AKAP6/CACNA2D1/STC1/G6PD/UCN/GPER1/CDK5/CACNB2/STIM1/CACNB3/IL13/CXCL10/CXCL11/P2RY6/HAP1/GRIN1/CD19/F2/F2R/CACNB4/STAC3/RYR2/CALM1/GJC2/GSTM2	65	0.503876
GO:0071277	BP	GO:0071277	cellular response to calcium ion	47/6492	87/18903	0.000125572	0.00268095	0.00202024	SYT7/DPEP1/SYT13/HSPA5/GUCA1A/MEF2A/RASGRP2/MEF2C/ITPKC/ADD1/CPNE6/EEF2K/RASA4/PPIF/ECT2/PKD2/SLC25A23/FOSB/SYT5/JUND/SYT11/ITPKA/CARF/IQGAP1/TRPM2/ITPKB/CPNE9/CAMK2D/CRHBP/KCNB1/ALOX15/PRKAA2/NCSTN/INHBB/CLIC4/NLGN1/FOS/JUNB/NEUROD2/SYT12/JUN/CPNE7/CPNE4/RYR3/SYT15/SYT3/CPNE1	47	0.54023
GO:2000243	BP	GO:2000243	positive regulation of reproductive process	47/6492	87/18903	0.000125572	0.00268095	0.00202024	TACR2/BAX/AURKA/CDC25B/FGF9/SYDE1/LFNG/RAD51AP1/CCR6/TACR1/INHBA/SOX9/PRDM7/EDNRB/NR5A1/DMRT1/PDE5A/VIP/STRA8/DHX37/CDC25C/INHBB/MSX1/PLB1/CDC25A/PRDM9/CITED2/SHH/AR/BNC1/TACR3/P2RY1/ZFPM2/PDE3A/OVOL1/TAC4/OXTR/MAPK15/UNC5C/RNASE10/PLCB1/WT1/ZP3/CACNA1H/SRC/SYCE3/APELA	47	0.54023
GO:2000045	BP	GO:2000045	regulation of G1/S transition of mitotic cell cycle	88/6492	185/18903	0.000130396	0.00277479	0.00209095	KMT2E/PKD1/DPF1/BID/FHL1/SMARCD1/FGF10/GTSE1/ACTB/JADE1/SMARCA2/RBL1/SMARCD3/CDC6/SMARCB1/PSME2/E2F1/RGCC/FBXO31/RBL2/CASP2/EZH2/SMARCD2/CCL2/CCND1/PTPN6/HYAL1/ID2/KIF14/PKD2/CCND2/CPSF3/INHBA/CDK2/STIL/CDKN1A/SMARCA4/PHF10/KCNA5/CDK7/APC/ANXA1/MDM2/ACTL6A/KLF4/PML/CYP1A1/RPTOR/TM4SF5/CTDSPL/CDKN2A/NACC2/ATM/ADAM17/ADAMTS1/LSM11/SASS6/DDR2/TERT/DACT1/PRAP1/E2F7/WEE1/CDK2AP2/FAM107A/RFWD3/CRADD/TR…	88	0.475676
GO:0032409	BP	GO:0032409	regulation of transporter activity	144/6492	326/18903	0.000131366	0.00278626	0.00209959	HECW1/ABCC8/MAPK8IP2/EHD3/ATP1A2/FHL1/KCNG1/RASGRF1/WNK1/SPHK2/CACNB1/ABCC9/GAL/GNB5/CACNG4/ACTB/ACTN2/MEF2C/ABCB1/REM1/FKBP1A/JPH4/TREM2/HCN2/MMP9/SGK2/SCN1B/CAV1/PPP3CB/PPIF/CCL2/KCNA1/IFNG/PDE4D/KMT2A/SGK1/CASQ2/PKD2/PPP3CC/KCNS1/AHNAK/OPRL1/WNK4/HSPA2/SYNGR3/ATP1B2/FGF13/EPO/HRC/RGN/CHRM3/EPHB2/GRP/MTNR1B/TACO1/PIM1/TRPC6/FXYD6/COX17/HCN4/HCN3/OSR1/STAC/SNCA/CAMK2D/ANK2/CRHBP/CRH/STOM/SCN2B/J…	144	0.441718
GO:0051306	BP	GO:0051306	mitotic sister chromatid separation	53/6492	101/18903	0.000132442	0.00279076	0.00210299	MAD1L1/DPF1/TACC3/CUL3/SPDL1/SMARCD1/TRIP13/ACTB/SMARCA2/NDC80/SMARCD3/BIRC5/CDC6/SMARCB1/SMARCD2/FBXO5/TTK/MAD2L2/CDC20/CENPF/DUSP1/ZWINT/XRCC3/DLGAP5/SMARCA4/PHF10/CCNB1/CDCA8/APC/ESPL1/ACTL6A/CENPE/ANAPC11/NUF2/ATM/INCENP/SPC25/BUB3/BUB1B/SPC24/MAD2L1/PTTG1/PRAP1/PLK1/CDT1/BUB1/ZWILCH/UBE2C/GEN1/AURKB/KNTC1/LCMT1/DPF3	53	0.524752
GO:0150115	BP	GO:0150115	cell-substrate junction organization	53/6492	101/18903	0.000132442	0.00279076	0.00210299	MYOC/VCL/EPHA3/GPM6B/ARHGAP6/LAMA3/SLK/ROCK1/ACTN1/FERMT2/CLASP1/CAMSAP3/ACTN2/COL16A1/SORBS1/ABL1/CORO2B/SFRP1/DUSP3/CORO1C/DUSP22/HRG/LAMTOR2/TEK/MACF1/KDR/AJUBA/ITGB4/ROCK2/LAMC1/TLN1/THBS1/ACVRL1/PHLDB2/PIK3R1/DST/MMP14/ITGA5/DLC1/RAB8B/GREM1/MAPRE2/FAM107A/BCL2/PTEN/RHOD/PEAK1/RCC2/APOD/SRC/STON1/ACTN3/ITGB3	53	0.524752
GO:0072210	BP	GO:0072210	metanephric nephron development	26/6492	41/18903	0.000134624	0.00282753	0.0021307	SOX8/TFAP2B/PKD1/PAX2/PDGFB/SALL1/HES1/STAT1/TCF21/PKD2/EGR1/SOX9/PAX8/LIF/PDGFRA/OSR1/KIF26B/GREM1/GDNF/LAMB2/CD34/WT1/HES5/AQP1/FOXD1/LHX1	26	0.634146
GO:0007613	BP	GO:0007613	memory	61/6492	120/18903	0.000141471	0.00296174	0.00223183	ITGA3/ABCC8/MUSK/RASGRF1/ABCA7/PRKCZ/PTGS2/ITGA8/KCNK2/TREM2/ITPR3/SLC8A3/NFATC4/HTR2A/CALB1/PPP3CB/CPEB3/KAT2A/MDK/SRF/TACR1/SLC8A2/SGK1/CCND2/ATXN1/LRRN4/KLK8/FGF13/LDLR/SERPINF1/SYT11/NGF/VLDLR/EIF4EBP2/JPH3/GRIA1/SORCS3/RCAN1/GIP/S100B/CHRNB2/ITGA5/CAMK2N1/LMX1A/NETO1/MAP1A/CX3CR1/FEN1/MECP2/NPAS4/BDNF/TH/OXTR/SLC2A4/PLCB1/NTF3/MAPT/RELN/ARC/PJA2/FOXO6	61	0.508333
GO:0072171	BP	GO:0072171	mesonephric tubule morphogenesis	38/6492	67/18903	0.000142444	0.00297248	0.00223992	SOX8/PAX2/SIX4/SALL1/EYA1/GATA3/FGF8/HES1/WNT6/TCF21/PKD2/SOX9/PAX8/BMP2/SIX1/WNT2B/MYC/FGF2/GREB1L/SMAD4/OSR1/ADAMTS16/HS3ST3A1/KIF26B/SHH/ILK/DCHS1/GREM1/GDNF/BCL2/CTNNBIP1/MAGED1/WT1/PBX1/PTCH1/FOXD1/HOXB7/LHX1	38	0.567164
GO:1904861	BP	GO:1904861	excitatory synapse assembly	19/6492	27/18903	0.000144054	0.00299641	0.00225796	CBLN1/NRXN2/SLITRK3/LRRC4/LRRC4B/NTRK3/LRRTM2/PTPRD/WNT7A/NPTN/ZDHHC12/NLGN1/NPTX1/PTEN/LRFN4/NRXN1/IL1RAP/PLXNB2/SRGAP2	19	0.703704
GO:0061008	BP	GO:0061008	hepaticobiliary system development	71/6492	144/18903	0.000145112	0.00300282	0.00226278	JARID2/PKD1/MKS1/HGF/CUL3/OTC/TGFBR3/LIMS2/ACAT1/CPB2/AURKA/SMARCB1/RHBDD3/HMOX1/ACO2/SRSF5/PCK2/HNF4A/FGL1/LSR/HPN/MET/EZH2/CDK5RAP3/CCND1/MDK/GLI1/SOD2/HES1/ACADM/RPS6KA1/PROX1/TNFAIP3/PKD2/ONECUT2/CIT/SOX9/MPST/E2F8/PRKCSH/RGN/RARA/PCNA/NOTCH2/ANXA1/IL6/NKX2-8/BAAT/PNPT1/PDX1/SERPINA10/CYP1A1/GATA6/SRD5A1/ARID5B/TGFA/CLDN1/IHH/CITED2/SOX17/ATP7A/E2F7/MESP1/PCSK9/ONECUT1/UCP2/TYMS/JUN/PTCH1/ADA…	71	0.493056
GO:0086019	BP	GO:0086019	cell-cell signaling involved in cardiac conduction	24/6492	37/18903	0.00014529	0.00300282	0.00226278	PKP2/KCNN2/TBX5/HCN2/SCN1B/TBX18/NUP155/CASQ2/KCNA5/TRPM4/HCN4/HCN3/ANK2/CACNA1C/CACNA2D1/CXADR/RNF207/KCNJ3/CACNB2/SCN3B/SCN4B/GJC1/FLNA/RYR2	24	0.648649
GO:0048048	BP	GO:0048048	embryonic eye morphogenesis	23/6492	35/18903	0.000148994	0.00305268	0.00230035	WNT16/PAX2/RARB/EFEMP1/VAX2/MFAP2/PROX1/TBX2/TFAP2A/STRA6/SIX3/FBN2/ZEB1/FZD5/HIPK1/IHH/CITED2/FBN1/SOX11/TH/FOXL2/ALDH1A3/MFAP5	23	0.657143
GO:0034698	BP	GO:0034698	response to gonadotropin	20/6492	29/18903	0.000149118	0.00305268	0.00230035	ITGA3/GCLM/TGFBR3/EPHA8/GATA1/SLC5A5/INHBA/PAX8/MAS1/LHCGR/CYP1B1/GATA6/CCNA2/SRD5A1/EDNRA/INHBB/GJB2/FSHR/WT1/SRD5A2	20	0.689655
GO:0072012	BP	GO:0072012	glomerulus vasculature development	20/6492	29/18903	0.000149118	0.00305268	0.00230035	NOTCH3/PDGFB/ACTA2/HES1/TCF21/TEK/EGR1/NOTCH2/PDGFRA/OSR1/EDNRA/ANGPT1/IL6R/SERPINB7/PDGFD/CD34/WT1/AQP1/ITGB3/PECAM1	20	0.689655
GO:0061437	BP	GO:0061437	renal system vasculature development	21/6492	31/18903	0.000151331	0.00307772	0.00231923	NOTCH3/PDGFB/ACTA2/HES1/TCF21/PKD2/TEK/EGR1/NOTCH2/PDGFRA/OSR1/EDNRA/ANGPT1/IL6R/SERPINB7/PDGFD/CD34/WT1/AQP1/ITGB3/PECAM1	21	0.677419
GO:0061440	BP	GO:0061440	kidney vasculature development	21/6492	31/18903	0.000151331	0.00307772	0.00231923	NOTCH3/PDGFB/ACTA2/HES1/TCF21/PKD2/TEK/EGR1/NOTCH2/PDGFRA/OSR1/EDNRA/ANGPT1/IL6R/SERPINB7/PDGFD/CD34/WT1/AQP1/ITGB3/PECAM1	21	0.677419
GO:0071248	BP	GO:0071248	cellular response to metal ion	93/6492	198/18903	0.000151769	0.00307772	0.00231923	AOC1/SYT7/DPEP1/SYT13/CDH1/HSPA5/GUCA1A/MEF2A/RASGRP2/PTGS2/MEF2C/ITPKC/ADD1/HMOX1/CPNE6/NFATC4/MMP9/EEF2K/RASA4/TFR2/PPIF/HSD17B1/KCNA1/ECT2/NFE2L2/PKD2/ADCY7/MT1G/SLC25A23/FOSB/SYT5/JUND/SERPINF1/SYT11/P2RX4/TFAP2A/ITPKA/CARF/CYP1A1/CYP1A2/IQGAP1/SLC13A5/TRPM2/ITPKB/CPNE9/SNCA/CAMK2D/CRHBP/ALAD/DLG2/NEK7/KCNB1/ATP13A2/ALOX15/PRKAA2/NCSTN/INHBB/CLDN1/HESX1/SHH/ATP7A/AQP2/CLIC4/NLGN1/FOS/JUNB/NPT…	93	0.469697
GO:0007188	BP	GO:0007188	adenylate cyclase-modulating G protein-coupled receptor signaling pathway	113/6492	248/18903	0.000152336	0.00307957	0.00232062	CALCR/PTGER3/ATP2B4/LPAR2/GLP2R/ADCY2/ADCYAP1R1/SCTR/GNAO1/PTHLH/RGS1/RAPGEF4/PALM/HRH3/VIPR2/GHRHR/GLP1R/ARRDC3/NPR3/PDE4D/OPRD1/RGS2/ADRA1A/ADCY7/PTGFR/RAMP3/GRM4/OPRL1/S1PR4/AVPR2/GNAI1/ADM2/GNAZ/MCHR1/GALR3/ADCY4/AKAP12/RAMP2/RAMP1/CHRM3/HRH4/HTR1B/GABBR2/LHCGR/CXCL9/CRTC3/GNAL/ADCYAP1/PRKACB/PTH2R/UCN2/VIP/ADRA2A/EDNRA/PRKCA/GPR26/GPR78/GNA14/GNAQ/WASF2/GIP/PTH1R/ADCY9/OXER1/ADORA1/GRIK3/HTR…	113	0.455645
GO:1902806	BP	GO:1902806	regulation of cell cycle G1/S phase transition	99/6492	213/18903	0.000154913	0.00312045	0.00235143	KMT2E/PKD1/DPF1/BID/FHL1/ATP2B4/SMARCD1/FGF10/GTSE1/ACTB/JADE1/SMARCA2/RBL1/SMARCD3/CDC6/SMARCB1/SUSD2/PSME2/E2F1/FAM83D/RGCC/FBXO31/RBL2/CASP2/EZH2/SMARCD2/CCL2/CCND1/GLI1/PTPN6/HYAL1/ID2/KIF14/PKD2/CCND2/CPSF3/TBX2/INHBA/CDK2/STIL/CDKN1A/SMARCA4/PHF10/KCNA5/MEN1/CDK7/APC/ANXA1/MDM2/ACTL6A/KLF4/PML/CYP1A1/RPTOR/TM4SF5/CTDSPL/CDKN2A/NACC2/ATM/ADAM17/ADAMTS1/LSM11/SASS6/DDR2/TERT/DACT1/PRAP1/E2F7/…	99	0.464789
GO:0009952	BP	GO:0009952	anterior/posterior pattern specification	101/6492	218/18903	0.000155323	0.00312045	0.00235143	MEOX1/HOXC8/CDON/HES2/LRP6/NLE1/PLXNA2/PALB2/TMED2/AURKA/DLL3/PCSK5/LRP5L/FOXF1/SFRP1/WNT2/LFNG/MEOX2/BMPR1A/FGF8/DKK1/WNT3/HOXB6/KAT2A/ZBTB16/SRF/TBX18/CDX1/HES1/ACVR2B/OTX1/WLS/KMT2A/HOXB8/HOXB5/HOXB3/HOXC13/HOXC11/FOXA2/BMP2/TCF15/FEZF1/BARX1/BHLHE40/WNT2B/HEY2/PCSK6/NKD1/SMAD4/OSR1/HES6/SFRP2/CRB2/ATM/SSBP3/ETS2/SKI/BTG2/FOXH1/TDRD5/EN1/MSX1/TDRD10/FZD5/HIPK1/HEY1/SHH/SOX17/CDX2/OTX2/MESP1/PB…	101	0.463303
GO:0003170	BP	GO:0003170	heart valve development	37/6492	65/18903	0.000156698	0.00312865	0.0023576	ELN/PRDM1/TIE1/ROCK1/MEF2C/TBX5/GATA3/BMPR1A/SNAI1/SOX4/SOX9/BMP2/OLFM1/GATA5/NFATC1/NOTCH2/ROCK2/HEY2/MDM2/STRA6/EMILIN1/SMAD4/SLIT2/TGFBR2/ADAMTS9/TBX20/HEY1/NOS3/DCHS1/SHOX2/EFNA1/ZFPM1/NKX2-5/SLIT3/PDE2A/BMPR2/SCX	37	0.569231
GO:0031100	BP	GO:0031100	animal organ regeneration	37/6492	65/18903	0.000156698	0.00312865	0.0023576	HGF/BAK1/PTPRU/TGFBR3/CPB2/AURKA/HMOX1/SRSF5/GATA1/EZH2/CXCL12/CCND1/GLI1/NR4A3/PGF/FLT3/RGN/NR0B2/PCNA/LPIN1/IL6/BAAT/PNPT1/PDX1/SERPINA10/CCNA2/PFKFB1/APOA2/CLDN1/IHH/TGFBR2/AXL/CDK1/UCP2/TYMS/GAS6/PTCH1	37	0.569231
GO:0043524	BP	GO:0043524	negative regulation of neuron apoptotic process	75/6492	154/18903	0.00015804	0.00314573	0.00237047	CX3CL1/TFAP2B/GCLM/ERBB3/ROCK1/SNCB/MEF2C/BAX/TYRO3/MSH2/JAK2/HMOX1/SIX4/NFATC4/TOX3/MAG/UNC5B/FGF8/CCL2/WFS1/PPARGC1A/CCND1/MDK/SOD2/CPEB4/KIF14/TGFB3/SIX1/KDR/NES/VSTM2L/NGF/IL6ST/MTNR1B/AGAP2/FAIM2/STXBP1/HDGF/DLX1/SNCA/HYOU1/ADAM8/POU4F1/NR4A2/ANGPT1/PINK1/BTG2/DRAXIN/EN1/TERT/GRIK2/EN2/AXL/CX3CR1/GDNF/MECP2/SEMA3E/BCL2L1/BCL2/FOXB1/NDNF/HRAS/BDNF/BOK/JUN/F2R/CLN8/NTF3/CLN3/FZD9/XRCC2/SLC30A1…	75	0.487013
GO:0046364	BP	GO:0046364	monosaccharide biosynthetic process	48/6492	90/18903	0.000161889	0.00321246	0.00242076	SLC25A13/PDK2/CRY1/DGAT2/SIRT6/C1QTNF3/AKR1B1/SIRT1/SLC25A1/PCK2/PGK1/SLC39A14/KAT2A/PPARGC1A/TPI1/NR3C1/KAT2B/SLC25A12/LEPR/ACADM/AKR1A1/NLN/RGN/PER2/SLC37A4/G6PC3/SIK1/PGD/OGT/SOGA1/FOXO1/RANBP2/PFKFB1/G6PD/CRTC2/ATF3/SERPINA12/GPT/ZNF692/MST1/PC/CLK2/SLC25A10/PGP/PPARA/SIRT7/WDR5/INS	48	0.533333
GO:0006828	BP	GO:0006828	manganese ion transport	13/6492	16/18903	0.000163176	0.0032281	0.00243254	ATP2C1/SLC11A1/ATP2C2/SLC39A14/ATP13A1/TRPC4/TMEM165/TRPC6/TRPC3/SLC39A8/TRPM2/TRPC1/SLC30A10	13	0.8125
GO:0001657	BP	GO:0001657	ureteric bud development	51/6492	97/18903	0.000164956	0.00324346	0.00244412	SOX8/PAX2/RARB/ARG2/SIX4/SMAD7/SALL1/EYA1/CALB1/SFRP1/GATA3/FGF8/SIM1/HES1/WNT6/TCF21/PKD2/EPCAM/CAT/SOX9/PAX8/BMP2/SIX1/FOXJ1/RARA/WNT2B/MYC/FGF2/GREB1L/SMAD4/OSR1/SLIT2/ADAMTS16/HS3ST3A1/KIF26B/SPRY1/BMPER/SHH/ILK/DCHS1/GREM1/GDNF/BCL2/CTNNBIP1/MAGED1/WT1/PBX1/PTCH1/FOXD1/HOXB7/LHX1	51	0.525773
GO:0060993	BP	GO:0060993	kidney morphogenesis	51/6492	97/18903	0.000164956	0.00324346	0.00244412	SOX8/PKD1/WWTR1/FGF10/PAX2/SIX4/SALL1/EYA1/CALB1/GATA3/FGF8/HES1/STAT1/WNT6/TCF21/PKD2/SOX4/SOX9/PAX8/BMP2/WNK4/SIX1/LIF/FOXJ1/WNT2B/MYC/FGF2/FRAS1/GREB1L/SMAD4/OSR1/ADAMTS16/HS3ST3A1/KIF26B/SHH/ILK/DCHS1/GREM1/GDNF/BCL2/CTNNBIP1/MAGED1/WT1/PBX1/PTCH1/GCNT1/LRRK2/HES5/FOXD1/HOXB7/LHX1	51	0.525773
GO:0090257	BP	GO:0090257	regulation of muscle system process	116/6492	256/18903	0.000165807	0.00325032	0.00244929	ABCC8/GTF2IRD1/JARID2/EHD3/IGF1/ATP1A2/DSG2/PKP2/CAMK2B/ATP2B4/CACNB1/ROCK1/HDAC4/MEF2A/LMCD1/PTGS2/ENO1/TACR2/PPP1R12B/SLC8A3/MYLK2/MYL9/SMAD7/DMPK/TNNT1/CAV1/P2RX1/SGCA/CACNG1/KCNA1/SRF/PDE4D/TNNC1/FOXP1/TACR1/IGFBP5/ERRFI1/RGS2/TNNI3K/TNNT2/FOXO3/CASQ2/NR4A3/ADRA1A/NR4A1/PARP2/FGF13/TNNI3/CNN1/HRC/TRPM4/TNNI2/GATA5/CHRM3/MYBPH/ROCK2/IL6ST/SPX/DSC2/P2RX4/BIN1/HCN4/PDE5A/TRPC3/TPM1/MYOCD/SMAD4/C…	116	0.453125
GO:0032754	BP	GO:0032754	positive regulation of interleukin-5 production	10/6492	11/18903	0.000172006	0.00334765	0.00252263	PRKCZ/GATA3/PDE4D/IL1RL1/RARA/IL33/TSLP/IL17RA/IL1RAP/CRLF2	10	0.909091
GO:0051256	BP	GO:0051256	mitotic spindle midzone assembly	10/6492	11/18903	0.000172006	0.00334765	0.00252263	BIRC5/KIF4A/AURKC/CDCA8/KIF23/INCENP/RACGAP1/AURKB/PRC1/KIF4B	10	0.909091
GO:0035270	BP	GO:0035270	endocrine system development	67/6492	135/18903	0.000172325	0.00334765	0.00252263	BAK1/CDH1/DKK3/PITX1/FGF10/GLI2/RAP1GAP/HNF4A/SALL1/GHRHR/LHX3/GATA3/BMPR1A/FGF8/MDK/GLI1/BMP5/SRF/NR3C1/HES1/APOA1/ONECUT2/HOXB3/SOX4/SOX9/PAX8/FOXA2/NKX2-2/BMP2/THRA/SIX1/MNX1/MEN1/CLOCK/PDGFRA/ANXA1/CGA/IL6/NKX2-1/NR5A1/STRA6/CYP1B1/SIX3/FGF2/PDX1/GATA6/SMAD4/TBX19/SRD5A1/CRH/SIDT2/ARID5B/EDNRA/GIP/IL6R/INHBB/NKX6-1/HESX1/PITX2/CITED2/SHH/ONECUT1/OTP/NKX2-5/TBX1/WT1/PBX1	67	0.496296
GO:0090102	BP	GO:0090102	cochlea development	30/6492	50/18903	0.000180694	0.00349973	0.00263723	PAFAH1B1/MCM2/PAX2/KCNK2/MYO3A/PVALB/EYA1/CALB1/HPN/GATA3/IFT20/SOBP/PTK7/TBX18/HES1/EPHA4/TBX2/SOX9/SIX1/HEY2/ADAM10/NTRK3/CCNA2/ZEB1/CTHRC1/DCHS1/SLC26A5/KCNK3/FZD2/TBX1	30	0.6
GO:0015833	BP	GO:0015833	peptide transport	115/6492	254/18903	0.000183658	0.00354651	0.00267249	ABCC8/NOS2/TFAP2B/SYT7/SLC25A39/PTPRN/GAL/SREBF1/TACR2/SIRT6/CDH17/AACS/SLC15A1/SLC8B1/RAPGEF4/JAK2/LRP5L/PICK1/PCK2/HNF4A/CDK16/CA2/SFRP1/STX1A/GHRHR/TFR2/RAB11FIP2/PPP3CB/CPE/TCIRG1/IFNG/SLC16A10/ACVR2B/PASK/KLF7/SNX19/TNFSF11/SOX4/ABCC4/PAX8/FOXA2/VGF/KCNA5/TRPM4/ANO1/NR0B2/PER2/GRP/MTNR1B/CLOCK/ANXA1/GLUL/IL6/BLK/IL1RN/UQCC2/PDX1/ADCYAP1/TRPM2/S100A8/ABCA12/EPHA5/CRHBP/VIP/SLC16A2/HTR2C/CRH/C…	115	0.452756
GO:0009914	BP	GO:0009914	hormone transport	133/6492	300/18903	0.000191451	0.0036765	0.00277044	ABCC8/NOS2/TFAP2B/CRY1/SYT7/PTPRN/GAL/SREBF1/TACR2/SIRT6/AACS/C1QTNF3/SLC8B1/LTBP4/RAPGEF4/JAK2/LRP5L/PICK1/PCK2/HNF4A/CDK16/CRYM/SFRP1/STX1A/GHRHR/TFR2/GATA3/RAB11FIP2/PPP3CB/CPE/TCIRG1/IFNG/GLP1R/SLC16A10/SNX4/ACVR2B/TACR1/PASK/KLF7/TTR/VAMP8/SPP1/SNX19/TNFSF11/CRY2/INHBA/INHA/SOX4/PAX8/FOXA2/WNK4/LIF/VGF/KCNA5/TRPM4/ANO1/NR0B2/PER2/GRP/SLCO1B1/MTNR1B/CLOCK/ANXA1/CGA/GLUL/IL6/BLK/IL1RN/UQCC2/SL…	133	0.443333
GO:0050679	BP	GO:0050679	positive regulation of epithelial cell proliferation	103/6492	224/18903	0.000191526	0.0036765	0.00277044	DLX6/NME2/IGF1/CYBA/PTPRN/CDH3/FGF10/TP63/MYDGF/PAX2/SIRT6/FGFR1/TGM1/SIRT1/HMOX1/PDGFB/PPP1R16B/FGF9/ESRP2/EYA1/SFRP1/HPN/DLX5/WNT2/CXCL12/BMPR1A/AREG/CCND1/MDK/ST8SIA1/BMP5/HYAL1/TACR1/AKT3/F3/PROX1/NRP2/TNFAIP3/NR4A3/PGF/TEK/NR4A1/RUNX2/SOX9/BMP2/STAT5A/KDR/NOTCH2/GLUL/LAMC1/HTR2B/MYC/YAP1/FGF2/PDX1/ACVRL1/FGF7/RPTOR/ERBB2/ECM1/OSR1/AGTR1/VIP/ADAM17/PRKCA/WNT7A/FZD7/EMC10/TGFA/CLDN1/IHH/HMGB2/…	103	0.459821
GO:0043627	BP	GO:0043627	response to estrogen	39/6492	70/18903	0.000195897	0.00374928	0.00282528	BRCA1/GAL/MMP2/ESR1/HMOX1/SFRP1/CAV1/GHRHR/GATA3/CCND1/CYP27B1/ARSB/IGFBP2/TGFB3/TRIM25/TRIM24/EPO/ARPC1B/RARA/TSHB/DHH/HAPLN3/GATA6/SRD5A1/CRHBP/WNT7A/MMP14/SLC34A2/APOA2/TGFBR2/CITED2/TNFRSF11B/AR/ZNF366/CITED4/MME/ARID5A/NCOA4/CD24	39	0.557143
GO:0007612	BP	GO:0007612	learning	73/6492	150/18903	0.000197283	0.00375204	0.00282736	PRKAR2B/ABCC8/MAPK8IP2/FYN/ATP1A2/UBA6/ABCA7/PTGS2/TACR2/RAPGEF3/JPH4/ABL1/SLC8A3/ADAM2/PPP3CB/DKK1/GIT1/IFT20/NRXN2/SRF/BCHE/TANC1/TACR1/KMT2A/SLC8A2/SLC12A5/ATXN1/OPRL1/LRRN4/SPECC1/FGF13/SYT11/EPHB2/MEIS2/TACO1/TBR1/TLR2/STRA6/ITGB1/SLC7A11/JPH3/SORCS3/NPTN/KIT/BTG2/CHRNB2/EN1/UCN/CDK5/NETO1/RAG1/MAP1A/MECP2/DRD5/FOS/NEUROD2/FOXB1/CNTNAP2/NPAS4/FOSL1/GRIN1/NRXN1/TH/CLN8/PLCB1/CLDN5/CNTN2/CLN3/…	73	0.486667
GO:0002062	BP	GO:0002062	chondrocyte differentiation	58/6492	114/18903	0.000197781	0.00375204	0.00282736	COL11A1/IFT80/RARB/MEF2C/PTHLH/SMAD7/FGF9/TRPS1/SLC39A14/COMP/BMPR1A/NKX3-2/ZBTB16/MDK/SOX6/EFEMP1/MEF2D/SNX19/TGFBI/RUNX2/SOX9/BMP2/CHSY1/LOXL2/WNT2B/SOX5/ADAMTS7/SULF1/BMPR1B/COL2A1/ACVRL1/ECM1/WNT9A/OSR1/SFRP2/NFIB/SERPINH1/HMGA2/ADAMTS12/WNT7A/FGF18/PTH1R/PKDCC/IHH/TGFBR2/GREM1/LTBP3/SHOX2/CYTL1/CHST11/MAF/PTPN11/COL27A1/ARID5A/ANXA6/BMPR2/SCX/MUSTN1	58	0.508772
GO:0002526	BP	GO:0002526	acute inflammatory response	58/6492	114/18903	0.000197781	0.00375204	0.00282736	CD6/PTGER3/CREB3L3/TFRC/PTGS2/EIF2AK1/RHBDD3/TFR2/GATA3/IL1A/TACR1/ASH1L/F3/TNFSF11/TREM1/C3/APOL2/LBP/EPO/F12/CRP/APCS/SAA2/IL6ST/EDNRB/IL6/PRCP/S100A8/AHSG/PTGES/SAA4/FCGR1A/ADRA2A/ADAM8/APOA2/IL6R/NLRP3/ADORA1/DNASE1L3/IL31RA/SAA1/NLRP6/A2M/ANO6/CTNNBIP1/F2/FUT7/CXCR2/F8/FFAR3/ZP3/SERPINA1/ELANE/FCGR3A/C2CD4B/ORM1/INS/HP	58	0.508772
GO:0098657	BP	GO:0098657	import into cell	114/6492	252/18903	0.00020341	0.00384754	0.00289933	CALCR/ABCC8/SLC6A13/FYN/ATP1A2/GPM6B/KCNH2/ATP2B4/SLC2A3/WNK1/SLC9A7/ABCC9/CYBRD1/ACTB/ATP12A/SLC46A1/SLC1A3/LRP2/SLC15A1/TREM2/HCN2/SLC5A1/SLC8A3/CACNA1F/SLC6A2/SLC39A14/SLC1A6/ATP1A3/ATP4A/TFR2/PPP3CB/P2RX1/FOLR1/SLC6A12/SLC38A1/IFNG/SLC12A7/KCNJ13/SLC1A4/RGS2/SLC8A2/PPP3CC/KCNJ8/RAMP3/SLC12A5/WNK4/TRPV5/SYNGR3/STEAP4/ATP1B2/TRPM4/SLC6A6/SLC6A11/PER2/SLC38A2/SPX/SLC9A5/ISCU/THBS1/STRA6/SLC5A6/H…	114	0.452381
GO:0051147	BP	GO:0051147	regulation of muscle cell differentiation	77/6492	160/18903	0.000210368	0.00394844	0.00297536	PTBP1/IGF1/PRDM6/HDAC4/ATP11A/NFATC3/MEF2C/SIRT1/PDGFB/NFATC2/LAMA1/FGF9/DMPK/OLFM2/CEACAM5/EZH2/BMPR1A/DKK1/KAT2A/HDAC5/SOX6/SOD2/RBM24/SRF/FOXP1/ID2/RGS2/NID1/PROX1/NLN/EREG/BMP2/MYOD1/PARP2/DNMT1/NFATC1/RBM38/CAMK1/HEY2/MDM2/LAMC1/TARBP2/MYOCD/SMAD4/SIK1/ZEB1/PDCD4/AKAP6/FZD7/MMP14/KIT/G6PD/MSX1/LMOD3/TCF23/PI16/SHH/GPER1/MESP1/RBPMS2/IGF2/SHOX2/MECP2/BCL2/LAMB2/EFEMP2/BDNF/TRIM72/NKX2-5/TMEM1…	77	0.48125
GO:0120254	BP	GO:0120254	olefinic compound metabolic process	77/6492	160/18903	0.000210368	0.00394844	0.00297536	HSD17B6/CYP46A1/DKK3/DGAT2/DHRS9/PTGS2/MGLL/RDH8/AKR1B1/PTGS1/CYP2D6/ABHD12/ACOT8/LHB/PLA2G4C/PTGDS/HSD17B1/BMP5/CLCN2/PLA2G4A/FAAH/TTR/ELOVL3/EGR1/EPHX2/LRAT/PTGIS/BMP2/HSD17B3/STARD3/CYP2J2/FADS2/RDH5/EDNRB/CYP1B1/CYP2C9/CYP2C8/RDH16/RDH12/CYP11A1/CYP1A1/CYP1A2/EPHX1/SRD5A1/FADS1/CYP2U1/PLA2G2F/CBR1/CYP3A4/CYP3A7/ALOX15/PLB1/DAGLB/DHRS13/SDR9C7/CEL/STAT5B/HSD11B2/GRIN1/ALOXE3/ALOX12B/ALDH1A3/DG…	77	0.48125
GO:0031346	BP	GO:0031346	positive regulation of cell projection organization	153/6492	352/18903	0.000210718	0.00394844	0.00297536	KDM1A/ZMYND10/ITGA3/CX3CL1/PAFAH1B1/SS18L2/FYN/ANLN/CNTN1/HGF/LRRC7/CUL7/EPHA3/HSPA5/CAMK2B/NCKAP1/LTK/NTN1/SCARF1/FSCN1/PLXNA2/RAB21/P2RX7/MYO3A/ABL1/PALM/PLEK2/ZDHHC15/FBXO31/EEF2K/RP1/SF3A2/MEGF8/SCN1B/EZH2/LIMK1/SETX/CXCL12/NEURL1/WNT3/KAT2A/RND2/IFT20/MDK/CORO1C/NEDD9/BMP5/PTK7/SRF/ARSB/DPYSL3/PLXNA1/NFE2L2/EPHA4/WRAP73/RAP1A/RGS2/P3H1/TRIM67/TGFB3/RHOQ/TNN/PACSIN1/MACF1/VIL1/STYXL1/ATP1B2/E…	153	0.434659
GO:0097193	BP	GO:0097193	intrinsic apoptotic signaling pathway	132/6492	298/18903	0.000211186	0.00394844	0.00297536	KDM1A/PDK2/E2F2/PLAUR/BRCA1/BID/BAK1/DAPK2/CUL3/FNIP2/TMEM161A/BCL3/POLB/TP63/PTGS2/ATP2A3/ENO1/TP73/CYLD/PPP1R15A/BAX/PPP1R13B/CDIP1/MSH2/TREM2/SIRT1/JAK2/ABL1/HMOX1/NFATC4/MMP9/TRIB3/E2F1/PYCARD/BBC3/CAV1/CASP2/CXCL12/PPIF/WFS1/PTPMT1/SOD2/NME5/PDCD10/NFE2L2/TXNDC12/HELLS/CLU/MAPK8IP1/SNAI1/CDKN1A/PLAGL2/IFI6/TRAF2/DYRK2/STYXL1/CHAC1/BCL2L2/EPO/EDA2R/MYBBP1A/FIGNL1/EIF5A/CASP9/TPT1/MDM2/CIDEB/D…	132	0.442953
GO:0030239	BP	GO:0030239	myofibril assembly	38/6492	68/18903	0.000216591	0.00403783	0.00304272	MYOM2/MEF2A/ACTN2/SIX4/MYL9/TNNT1/PRKAR1A/MYH3/SRF/PROX1/TNNT2/LDB3/FLNC/TMOD2/MYH11/FHOD3/PDGFRA/TMOD1/MYPN/TPM1/SMAD4/ACTA1/ANKRD1/ITGB1/PGM5/CSRP1/ACTC1/ANKRD23/LMOD3/LMOD1/CFL2/AKAP13/MYOZ2/TCAP/CSRP2/NKX2-5/NEB/KLHL41	38	0.558824
GO:0006814	BP	GO:0006814	sodium ion transport	115/6492	255/18903	0.000222538	0.00413679	0.00311729	HECW1/SLC6A13/SLC6A7/CNTN1/ATP1A2/PRSS8/PKP2/ATP2B4/WNK1/SLC9A7/ATP12A/NKAIN1/SLC4A11/P2RX7/SLC8B1/HCN2/SLC5A1/CACNA1I/SLC10A1/SLC8A3/NKAIN4/SNTA1/NALCN/SLC38A7/SLC6A2/SLC17A7/DMPK/ATP1A3/SLC5A5/ATP4A/SCN1B/PKD2L1/COMMD9/SLC6A12/SLC38A1/SLC4A9/ATP6V1B1/SLC8A2/SGK1/PKD2/WNK4/ATP1B2/FGF13/TRPM4/SLC6A8/SLC6A6/SLC6A11/SLC38A2/GRP/P2RX4/SLC9A5/EDNRB/SCN7A/FXYD6/SLC5A6/HCN4/SLC38A4/SLC38A6/SLC24A4/SLC1…	115	0.45098
GO:0070997	BP	GO:0070997	neuron death	159/6492	368/18903	0.000226818	0.00420426	0.00316814	CX3CL1/TFAP2B/FYN/BID/GCLM/HSPA5/ERBB3/ROCK1/INPP5A/POLB/TP63/SNCB/MEF2C/BAX/NLRP1/CD200/TYRO3/MSH2/TREM2/SIRT1/JAK2/ABL1/CDC34/HMOX1/SIX4/NFATC4/MYBL2/CTSZ/TOX3/FGF21/MAG/GRIK5/CASP2/AIMP2/GATA3/UNC5B/FGF8/PITX3/DKK1/CSF3/CCL2/WFS1/TRIM2/PPARGC1A/CCND1/MDK/IFNG/GAPDH/NCOA7/SOD2/GHR/NR3C1/CPEB4/LANCL1/DHCR24/KMO/KIF14/FOXO3/NR4A3/TGFB3/EGR1/CLU/CIT/GRM4/SIX1/TRAF2/KDR/PARP2/EPO/SERPINF1/NES/VSTM2…	159	0.432065
GO:0072078	BP	GO:0072078	nephron tubule morphogenesis	41/6492	75/18903	0.000236569	0.00435368	0.00328073	SOX8/PKD1/PAX2/SIX4/SALL1/EYA1/GATA3/FGF8/HES1/WNT6/TCF21/PKD2/SOX9/PAX8/BMP2/WNK4/SIX1/WNT2B/MYC/FGF2/GREB1L/SMAD4/OSR1/ADAMTS16/HS3ST3A1/KIF26B/SHH/ILK/DCHS1/GREM1/GDNF/BCL2/CTNNBIP1/MAGED1/WT1/PBX1/PTCH1/HES5/FOXD1/HOXB7/LHX1	41	0.546667
GO:1901654	BP	GO:1901654	response to ketone	95/6492	205/18903	0.000236857	0.00435368	0.00328073	ABCB4/CYBA/SPHK2/MAOB/TGFBR3/SREBF1/ADCY2/TFAP4/SIRT1/JAK2/PCK2/SFRP1/SLC5A5/CAV1/HOXA13/CA9/RECQL5/UCP1/CCND1/RWDD1/NR3C1/FOXP1/TACR1/ERRFI1/SGK1/FOXO3/SPP1/KLF9/TGFB3/PTGFR/FOSB/NKX2-2/KLF2/GNAI1/EPO/SERPINF1/PCNA/NASP/CASP9/POSTN/ROCK2/DSG1/CDK4/TLR2/YAP1/THBS1/CYP1B1/METTL21C/NTRK3/ADAM15/SLIT2/SRD5A1/PSPH/FBXO32/CDA/PRKAA2/CLDN1/IGFBP7/GJB2/AVPR1A/SCNN1G/DDIT4/UGT3A2/AR/GLB1/FOS/PRKCE/PTGER4…	95	0.463415
GO:0001889	BP	GO:0001889	liver development	69/6492	141/18903	0.000236964	0.00435368	0.00328073	JARID2/PKD1/HGF/CUL3/OTC/TGFBR3/LIMS2/ACAT1/CPB2/AURKA/SMARCB1/RHBDD3/HMOX1/ACO2/SRSF5/PCK2/HNF4A/FGL1/LSR/HPN/MET/EZH2/CDK5RAP3/CCND1/MDK/GLI1/SOD2/HES1/ACADM/RPS6KA1/PROX1/TNFAIP3/PKD2/ONECUT2/CIT/SOX9/MPST/E2F8/PRKCSH/RGN/RARA/PCNA/NOTCH2/ANXA1/IL6/NKX2-8/BAAT/PNPT1/PDX1/SERPINA10/CYP1A1/GATA6/SRD5A1/ARID5B/TGFA/CLDN1/IHH/CITED2/ATP7A/E2F7/MESP1/PCSK9/ONECUT1/UCP2/TYMS/JUN/PTCH1/ADA/CEBPA	69	0.489362
GO:0046879	BP	GO:0046879	hormone secretion	129/6492	291/18903	0.00023775	0.00435368	0.00328073	ABCC8/NOS2/TFAP2B/CRY1/SYT7/PTPRN/GAL/SREBF1/TACR2/SIRT6/AACS/C1QTNF3/SLC8B1/LTBP4/RAPGEF4/JAK2/LRP5L/PICK1/PCK2/HNF4A/CDK16/SFRP1/STX1A/GHRHR/TFR2/GATA3/RAB11FIP2/PPP3CB/CPE/TCIRG1/IFNG/GLP1R/SLC16A10/SNX4/ACVR2B/TACR1/PASK/KLF7/VAMP8/SPP1/SNX19/TNFSF11/CRY2/INHBA/INHA/SOX4/PAX8/FOXA2/WNK4/LIF/VGF/KCNA5/TRPM4/ANO1/NR0B2/PER2/GRP/MTNR1B/CLOCK/ANXA1/CGA/GLUL/IL6/BLK/IL1RN/UQCC2/PDX1/ADCYAP1/SMAD4/…	129	0.443299
GO:1900274	BP	GO:1900274	regulation of phospholipase C activity	26/6492	42/18903	0.000238245	0.00435368	0.00328073	SELE/ARHGAP6/LPAR2/FGFR1/ADCYAP1R1/ESR1/ABL1/HTR2A/ITK/ADRA1A/S1PR4/PDGFRA/GPR55/HTR2B/FGF2/EDNRA/GNAQ/KIT/AVPR1A/P2RY12/NMUR1/P2RY6/RASGRP4/HRAS/LPAR1/ANG	26	0.619048
GO:0060675	BP	GO:0060675	ureteric bud morphogenesis	37/6492	66/18903	0.000239324	0.00436108	0.00328631	SOX8/PAX2/SIX4/SALL1/EYA1/GATA3/FGF8/HES1/WNT6/TCF21/PKD2/SOX9/PAX8/BMP2/SIX1/WNT2B/MYC/FGF2/GREB1L/SMAD4/ADAMTS16/HS3ST3A1/KIF26B/SHH/ILK/DCHS1/GREM1/GDNF/BCL2/CTNNBIP1/MAGED1/WT1/PBX1/PTCH1/FOXD1/HOXB7/LHX1	37	0.560606
GO:0045931	BP	GO:0045931	positive regulation of mitotic cell cycle	64/6492	129/18903	0.000240998	0.00437925	0.0033	KMT2E/PAFAH1B1/CUL3/USP2/FGF10/ASNS/CDC6/ABL1/CDC7/CDC25B/RGCC/DUSP3/CCND1/FBXO5/SMOC2/HES1/HYAL1/CCND2/CPSF3/STIL/DLGAP5/HSPA2/KCNA5/CCNB1/MEIS2/ANXA1/CDK4/ESPL1/MDM2/BRCA2/CYP1A1/ANAPC11/RPTOR/DTL/CDCA5/ADAM17/PRKCA/ADAMTS1/LSM11/SASS6/CDC25C/DBF4B/TAL1/DDR2/CDC25A/TERT/PRAP1/CDT1/MECP2/CDK1/RRM2/MTBP/STAT5B/UBE2C/CCDC57/SPHK1/RCC2/PTPN11/PLCB1/CDK10/PBX1/EIF4EBP1/TFDP1/DDX3X	64	0.496124
GO:0002931	BP	GO:0002931	response to ischemia	32/6492	55/18903	0.000248249	0.00449479	0.00338707	CX3CL1/MAP2K3/CAMK2A/PANX2/MEF2C/P2RX7/TREM2/MLYCD/EEF2K/CAV1/PPIF/BVES/CPEB4/SLC8A2/EGR1/BCL2L2/PER2/CASP9/ROCK2/P2RX4/FAIM2/HYOU1/PINK1/RCAN1/HK2/SQSTM1/GJB2/CX3CR1/SLC26A5/BCL2/NDNF/NQO1	32	0.581818
GO:0021766	BP	GO:0021766	hippocampus development	44/6492	82/18903	0.000249391	0.00449479	0.00338707	PAFAH1B1/UBA6/PHLPP2/ATP2B4/LHX5/OGDH/EZH2/EZH1/MDK/KCNA1/NR2E1/SRF/DLX2/PROX1/KIF14/BBS2/FGF13/MAS1/PLXNA3/RARA/BCAN/NKX2-1/ATAT1/DLX1/TMEM108/EPHA5/SRD5A1/FEZ1/KIRREL3/ZIC1/LRP8/BTG2/LMX1A/CDK5/SEMA6B/DCLK2/CDK5R2/PTEN/ID4/CDK5R1/RELN/HSD3B1/NEFL/SRD5A2	44	0.536585
GO:0005996	BP	GO:0005996	monosaccharide metabolic process	112/6492	248/18903	0.000249441	0.00449479	0.00338707	FUCA2/PDK4/SLC25A13/PDK2/TFAP2B/CRY1/IGF1/SLC2A3/DGAT2/GSTO2/PKM/RORA/ENO1/ACACB/SIRT6/DUSP12/C1QTNF3/GCKR/AKR1B1/OAS1/XYLB/SORBS1/SIRT1/SLC25A1/PCK2/SLC35A2/PGK1/MLYCD/SLC39A14/DHDH/GAPDHS/BRAT1/GALK1/KAT2A/PPARGC1A/GAPDH/TPI1/NR3C1/KAT2B/PFKFB4/SLC25A12/LEPR/ACADM/GALE/AKR1A1/NLN/FOXA2/DYRK2/RGN/PER2/ALDOB/SLC37A4/PDX1/PMM2/G6PC3/FOXK2/SIK1/PGD/GALM/IGFBP3/OGT/FUOM/SOGA1/FOXO1/PDK1/PFKM/RANBP2/…	112	0.451613
GO:0010863	BP	GO:0010863	positive regulation of phospholipase C activity	25/6492	40/18903	0.000252566	0.00453846	0.00341998	SELE/ARHGAP6/LPAR2/FGFR1/ADCYAP1R1/ESR1/HTR2A/ITK/ADRA1A/S1PR4/PDGFRA/GPR55/HTR2B/FGF2/EDNRA/GNAQ/KIT/AVPR1A/P2RY12/NMUR1/P2RY6/RASGRP4/HRAS/LPAR1/ANG	25	0.625
GO:0030048	BP	GO:0030048	actin filament-based movement	66/6492	134/18903	0.000253466	0.00454203	0.00342266	ATP1A2/DSG2/KCNH2/PKP2/ROCK1/ABCC9/KCNN2/EPDR1/MYO15A/MYL6/MYLK2/SNTA1/SCN1B/CAV1/ACTA2/MYH3/PDE4D/NUP155/TNNC1/WIPF1/TNNT2/KCNJ8/WIPF3/MYH2/VIL1/MYO1B/FGF13/KCNA5/TRPM4/DSC2/BIN1/MYO7A/FNBP1L/HCN4/FRMD6/TPM1/CAMK2D/ANK2/GSN/SCN2B/CACNA1C/KCNE4/GPD1L/CACNA2D1/WASF2/RNF207/STC1/ACTC1/KCNJ3/ADORA1/CACNB2/SCN3B/SGCD/KCND3/SCN4B/GJC1/CTNNA3/PDE4B/MYL6B/FLNA/PARVA/MYO1C/PLN/RYR2/MYH4/MYO19	66	0.492537
GO:1901989	BP	GO:1901989	positive regulation of cell cycle phase transition	61/6492	122/18903	0.000254502	0.00454799	0.00342715	KMT2E/CUL3/FGF10/THOC1/CDC6/CDC7/CDC25B/FAM83D/RGCC/EZH2/CCND1/GLI1/FBXO5/HYAL1/CCND2/CPSF3/TBX2/STIL/DLGAP5/HSPA2/KCNA5/CCNB1/ANXA1/CDK4/ESPL1/MDM2/CYP1A1/ANAPC11/RPTOR/DTL/DYRK3/CDCA5/ADAM17/ADAMTS1/LSM11/SASS6/CDC25C/DBF4B/DDR2/CDC25A/TERT/PRAP1/STXBP4/CDT1/MECP2/CDK1/RRM2/MTBP/UBE2C/ATAD5/RCC2/MAPK15/PLCB1/CHEK2/CDK10/PBX1/DDRGK1/TFDP1/DDX39B/DDX3X/PAGR1	61	0.5
GO:0006006	BP	GO:0006006	glucose metabolic process	88/6492	188/18903	0.000259811	0.00463008	0.00348901	PDK4/SLC25A13/PDK2/TFAP2B/CRY1/IGF1/DGAT2/PKM/RORA/ENO1/ACACB/SIRT6/DUSP12/C1QTNF3/GCKR/OAS1/SORBS1/SIRT1/SLC25A1/PCK2/PGK1/MLYCD/SLC39A14/GAPDHS/BRAT1/KAT2A/PPARGC1A/GAPDH/TPI1/NR3C1/KAT2B/SLC25A12/LEPR/ACADM/NLN/FOXA2/DYRK2/RGN/PER2/SLC37A4/PDX1/G6PC3/FOXK2/SIK1/GALM/IGFBP3/OGT/SOGA1/FOXO1/PDK1/PFKM/RANBP2/HKDC1/HK1/PHKG2/PFKFB1/SLC45A3/ADPGK/HK2/G6PD/CRTC2/HK3/ATF3/PGM2L1/SERPINA12/IGF2/MIDN/G…	88	0.468085
GO:0060415	BP	GO:0060415	muscle tissue morphogenesis	40/6492	73/18903	0.000262671	0.00466818	0.00351773	PKP2/COL11A1/MYLK/TGFBR3/LRP2/FKBP1A/MYLK2/SMAD7/WNT2/BMPR1A/HAND1/TNNC1/PROX1/TNNT2/BMP2/TNNI3/HEY2/TPM1/SMAD4/ANKRD1/EDNRA/POU4F1/TNNI1/ACTC1/MYL3/FOXH1/TBX20/SHOX2/ZFPM2/S1PR1/CHD7/EFEMP2/HEG1/TCAP/ZFPM1/FZD2/NKX2-5/TBX1/ADARB1/RYR2	40	0.547945
GO:0072028	BP	GO:0072028	nephron morphogenesis	43/6492	80/18903	0.000277769	0.00492298	0.00370972	SOX8/PKD1/PAX2/SIX4/SALL1/EYA1/GATA3/FGF8/HES1/STAT1/WNT6/TCF21/PKD2/SOX9/PAX8/BMP2/WNK4/SIX1/LIF/WNT2B/MYC/FGF2/GREB1L/SMAD4/OSR1/ADAMTS16/HS3ST3A1/KIF26B/SHH/ILK/DCHS1/GREM1/GDNF/BCL2/CTNNBIP1/MAGED1/WT1/PBX1/PTCH1/HES5/FOXD1/HOXB7/LHX1	43	0.5375
GO:0015711	BP	GO:0015711	organic anion transport	160/6492	372/18903	0.000281609	0.00497741	0.00375074	SLC25A13/ABCB4/NOS2/SLC6A13/SLC6A7/SLC25A39/SLC38A5/SLC11A1/ATP1A2/SLC7A9/SLC2A3/MPC1/PTGS2/SLC46A1/SLC1A3/SLC35C2/LRP2/SLCO1A2/SLC4A11/P2RX7/SLC26A3/SLC25A1/SLC16A8/SLC25A17/SLC10A1/HRH3/SLC17A9/SLC52A3/SLC25A14/SLC35A2/SLC25A15/SLC38A7/SLC7A6/AQP9/SLC17A7/SLC1A6/PLEKHA8/APBA1/MFSD10/FOLR1/SLC6A12/SLC38A1/SLCO1B3/RHAG/SLC16A10/SLC4A9/IL1A/RAB3GAP1/SLC25A12/SLC1A4/PLEKHA3/PLA2G4A/RGS2/KMO/SLC19A2…	160	0.430108
GO:0048145	BP	GO:0048145	regulation of fibroblast proliferation	46/6492	87/18903	0.000285562	0.00502725	0.0037883	IGF1/B4GALT7/FGF10/FOSL2/SIRT6/BAX/ESR1/CDC6/ABL1/PDGFB/E2F1/SFRP1/MED25/CAV1/WNT2/SOD2/KMT2A/CDKN1A/EREG/LIF/CCNB1/PDGFRA/CDK4/DAB2IP/MYC/PML/CCNA2/PDGFC/SKI/DDR2/NLRC3/IL13/PDGFD/HRAS/CD248/SPHK1/JUN/PARP10/CTC1/GAS6/C1QL4/S100A6/AQP1/MIF/ITGB3/DACH1	46	0.528736
GO:0070341	BP	GO:0070341	fat cell proliferation	11/6492	13/18903	0.000286212	0.00502725	0.0037883	FGF10/TREM2/E2F1/E2F3/PER2/FTO/PID1/SQSTM1/VSTM2A/DIO3/TFDP1	11	0.846154
GO:0042770	BP	GO:0042770	signal transduction in response to DNA damage	85/6492	181/18903	0.00028676	0.00502725	0.0037883	KDM1A/CRY1/BRCA1/BID/RAD51/FOXN3/BCL3/TIPIN/GTSE1/THOC1/CDC14B/ATRX/TFAP4/WDR76/CLSPN/MSH2/SIRT1/ABL1/TELO2/TTI1/E2F1/FBXO31/CASP2/ZNHIT1/CDK5RAP3/CCND1/FOXM1/CCNG1/FBXO6/MAD2L2/GADD45A/FOXO3/CDK2/SNAI1/CDKN1A/SOX4/EEF1E1/STK33/CASP9/CLOCK/MDM2/BRIP1/BRCA2/PML/TICRR/DTL/DYRK3/INTS7/SMYD2/FANCD2/ANKRD1/ATM/CHEK1/EME1/PAXIP1/DONSON/MSX1/TOPBP1/ATRIP/PRAP1/E2F7/SPRED1/PLK1/PBK/RFWD3/FEM1B/CRADD/CDK1…	85	0.469613
GO:0008202	BP	GO:0008202	steroid metabolic process	141/6492	323/18903	0.000290642	0.00508068	0.00382856	CYP3A43/OSBPL5/HSD17B6/CYP46A1/DKK3/MSMO1/DGAT2/GAL/RORA/OSBPL3/SREBF1/SCARB1/DHRS9/SCARF1/RDH8/LRP2/AKR1B1/ESR1/CYP26A1/SIRT1/SEC14L2/CYP2D6/CYB5R3/APOL1/ACOT8/SQLE/LHB/PRKAG2/CUBN/HSD17B1/SULT1E1/NFKB1/APOA5/MVK/CYP27B1/IFNG/BMP5/NR3C1/SCAP/CLCN2/IL1A/DHCR24/LEPR/NR5A2/PROX1/APOA1/SPP1/EGR1/EPHX2/CAT/AKR1D1/SNAI1/BMP2/SRD5A3/APOL2/CLN6/LDLR/APOC1/SULT4A1/HSD17B3/ACLY/STARD3/NR0B2/HSD17B7/ANGPTL…	141	0.436533
GO:0070527	BP	GO:0070527	platelet aggregation	39/6492	71/18903	0.000291557	0.00508068	0.00382856	VCL/TSPAN32/ACTB/GP6/TYRO3/JAK2/CTSG/MYL9/GATA1/COMP/PTPN6/MPL/IL6ST/PDGFRA/IL6/BLK/STXBP1/TLN1/MMRN1/SLC7A11/UBASH3B/PRKCA/F11R/CSRP1/ILK/P2RY12/FGG/FGA/FGB/FIBP/PRKG1/BLOC1S4/PEAR1/PPIA/FLNA/MFSD2B/HBB/LYN/ITGB3	39	0.549296
GO:0060541	BP	GO:0060541	respiratory system development	97/6492	211/18903	0.000292164	0.00508068	0.00382856	ITGA3/PKD1/FGF10/SREBF1/GLI2/TP73/HSPB11/PGR/GRHL2/TBX5/SIX4/CTSZ/LAMA1/PHEX/FGF9/ESRP2/CRISPLD2/FOXF1/DLX5/WNT2/AIMP2/PLOD3/LHX3/BMPR1A/FGF8/GLI1/TIMELESS/PTK7/SRF/HES1/ACVR2B/CLCN2/ITGB6/IGFBP5/ERRFI1/PROX1/TCF21/TGFB3/TBX2/TBX4/SOX9/THRA/SIX1/KLF2/KDR/LIF/FOXJ1/RARA/CHI3L1/WNT2B/PDGFRA/SPRY2/NKX2-8/NKX2-1/YAP1/STRA6/FGF2/FGF7/CYP1A2/MYOCD/GATA6/ABCA12/CRH/RSPO2/NFIB/SLC7A11/DISP1/FGF18/MMP14/S…	97	0.459716
GO:0030111	BP	GO:0030111	regulation of Wnt signaling pathway	146/6492	336/18903	0.000294923	0.0051149	0.00385435	HECW1/ITGA3/MKS1/WWTR1/ZRANB1/DEPDC1B/DKK3/WNK1/PTPRU/CDH3/ASPM/IFT80/FGF10/NLE1/JADE1/CYLD/NLK/ABL1/NFATC4/GID8/SPEF1/RSPO4/FERMT1/TBL1X/FGF9/SALL1/SFRP1/TLE6/PLEKHA4/DLX5/CAV1/GRB10/TLE4/KANK1/DKK1/WNT3/IFT20/NFKB1/FOLR1/MDK/GLI1/MDFI/PTK7/TBX18/CSNK1A1/IGFBP2/USP34/MAD2L2/WLS/TMEM9/TNFAIP3/FOXO3/SFRP5/TNN/EGR1/RECK/LRP1/SOX4/SOX9/BMP2/MACF1/SMARCA4/TRPM4/NFATC1/BARX1/NPHP4/ZBED3/LGR6/CSNK1G2/L…	146	0.434524
GO:0016049	BP	GO:0016049	cell growth	206/6492	493/18903	0.000298735	0.00515933	0.00388783	SEMA3F/PAFAH1B1/SPAG9/SEMA3G/IGF1/PRDM11/FHL1/VCL/CDH1/RTN4R/ROS1/CYBA/CYFIP2/IL17RB/OGFR/SPHK2/NTN1/KIF26A/PRKCZ/IP6K2/RASGRP2/CDHR2/ENO1/SEMA3A/SPAG6/JADE1/RIMS1/RAB21/SMARCA2/EPB41L3/ULK2/AURKA/LTBP4/NRCAM/DPYSL2/SEMA4G/SIRT1/ABL1/CGRRF1/BDKRB1/CPNE6/SGK2/HNF4A/SMAD7/WFDC1/SFRP1/PTPRS/MEGF8/DDX49/MAG/HPN/BRAT1/LIMK1/LHX2/CXCL12/PPP3CB/LGI1/WNT3/RND2/TMEM97/IL2/CRYAB/CYP27B1/WASF1/SRF/DNPH1/HBE…	206	0.41785
GO:0008544	BP	GO:0008544	epidermis development	156/6492	362/18903	0.00029908	0.00515933	0.00388783	WNT16/PAFAH1B1/NME2/ATP2C1/NSUN2/LAMA3/OPN3/MCOLN3/LAMC2/CDH3/DLX3/ROCK1/GAL/FGF10/TP63/GLI2/FOSL2/DCT/GRHL2/PLOD1/PTHLH/TGM1/KRT31/TRPC4AP/FERMT1/TRADD/FA2H/TGM5/ESRP1/ERCC2/CASP14/OVOL3/CNFN/PLOD3/EZH2/LHX2/DKK1/CYP27B1/GLI1/COL7A1/HES1/IL1A/IGFBP5/ERRFI1/MYCL/PTCH2/KLF7/PPL/GORAB/CSTA/INHBA/HOXC13/SNAI1/EREG/SOX9/ZFP36/PALLD/KLK14/EDA2R/KRT34/SPINK5/ROCK2/EMP1/LRP4/ANXA1/KRT85/KRT7/HEY2/KLF4/M…	156	0.430939
GO:0045926	BP	GO:0045926	negative regulation of growth	112/6492	249/18903	0.000301676	0.00518493	0.00390712	SEMA3F/JARID2/SPAG9/SEMA3G/PRDM11/FHL1/CDH1/RTN4R/SPHK2/NTN1/IP6K2/CDHR2/ENO1/SEMA3A/JADE1/TP73/SMARCA2/KCNK2/ULK2/TBX5/SEMA4G/TLL2/SIRT1/CGRRF1/BDKRB1/HNF4A/WFDC1/SFRP1/PTPRS/MAG/WNT3/CRYAB/CYP27B1/WWC1/HRG/BCL6/HYAL1/FOXP1/IGFBP5/RGS2/SPP1/SOCS2/INHBA/CDKN1A/BBS2/MT1G/SMARCA4/FGF13/BST2/PLXNA3/BTG1/PSRC1/RERG/EPHA7/CGA/SEMA4F/KIAA0319/SEMA6D/PNPT1/ACVRL1/PML/NKD1/SMAD4/ADAM15/SLIT2/SFRP2/CDKN2A…	112	0.449799
GO:0044819	BP	GO:0044819	mitotic G1/S transition checkpoint signaling	20/6492	30/18903	0.000302968	0.00518493	0.00390712	GTSE1/FBXO31/CASP2/CCND1/CDK2/CDKN1A/MDM2/PML/ATM/PRAP1/RFWD3/CRADD/TRIAP1/PLK3/PIDD1/CHEK2/MUC1/PLK5/GIGYF2/PRKDC	20	0.666667
GO:0060325	BP	GO:0060325	face morphogenesis	20/6492	30/18903	0.000302968	0.00518493	0.00390712	MMP2/CRISPLD2/DLX5/DKK1/MYH3/RAB3GAP1/TGFB3/RRAS/PDGFRA/STRA6/CSRNP1/ARID5B/SKI/MSX1/TIPARP/SGPL1/PTPN11/TBX1/CLDN5/SCX	20	0.666667
GO:0021952	BP	GO:0021952	central nervous system projection neuron axonogenesis	19/6492	28/18903	0.000303807	0.00518556	0.0039076	MYCBP2/PAFAH1B1/GLI2/SCN1B/NR2E1/EPHA4/DCLK1/EPHB2/SLIT2/NFIB/NR4A2/EPHB1/SPTBN4/CHRNB2/DRAXIN/FBXO45/DCC/ADARB1/PLXNA4	19	0.678571
GO:0061572	BP	GO:0061572	actin filament bundle organization	78/6492	164/18903	0.000306318	0.0052094	0.00392556	CX3CL1/MYOC/CUL3/ARHGAP6/ELN/ROCK1/PFN2/ACTN1/FERMT2/CLASP1/ADD2/FSCN1/RAPGEF3/ADD1/ARHGAP28/EZR/SORBS1/ABL1/RGCC/CORO2B/TJP1/SFRP1/ARHGEF10/PIK3R2/MET/FSCN3/LIMK1/NEDD9/PHACTR1/SRF/DPYSL3/TACR1/STMN1/APOA1/TGFB3/SORBS3/CALD1/AIF1L/VIL1/BAIAP2L2/MYO1B/CGNL1/SWAP70/SPIRE1/ROCK2/MICAL1/FHOD1/FHDC1/ARRB1/TPM1/TMEFF2/PHLDB2/PIK3R1/FAM171A1/EPS8/RHPN1/WASF2/F11R/ZYX/DLC1/HSP90B1/FAM107A/MTSS1/S1PR1/PT…	78	0.47561
GO:0090596	BP	GO:0090596	sensory organ morphogenesis	121/6492	272/18903	0.000307068	0.0052094	0.00392556	WNT16/SOX8/DLX6/TFAP2B/BAK1/PRDM1/COL11A1/CDON/NTN1/FGF10/PAX2/RARB/ITGA8/BAX/DZANK1/MYO15A/RPGRIP1/MYO3A/SIX4/VSX1/RS1/FGF9/RP1/EYA1/CALB1/HPN/DLX5/WNT2/GATA3/FGF8/PITX3/NKX3-2/SOBP/PTK7/TBX18/EFEMP1/OTX1/VAX2/ATP6V1B1/MFN2/KCNQ4/MFAP2/PROX1/TBX2/HOXC13/SOX9/PAX8/SIX1/GNGT1/KDR/EPHB2/WNT2B/NOTCH2/CRB1/SPRY2/TFAP2A/MYO7A/STRA6/SIX3/ABI2/FGF2/FBN2/COL2A1/FOXN4/NKD1/EPHA2/WNT9A/OSR1/MEIS1/LRIG1/SHR…	121	0.444853
GO:0042552	BP	GO:0042552	myelination	69/6492	142/18903	0.000307619	0.0052094	0.00392556	CNTN1/HGF/TYMP/MYOC/CST7/EPB41L3/SLC8A3/FA2H/ACSBG1/ARHGEF10/ERCC2/PRX/MAG/ASPA/CNTNAP1/PMP22/CTSC/QKI/SLC25A12/KIF14/CLU/CXCR4/EGR2/PLP1/MYRF/ORMDL1/KLK8/NSUN5/RARA/ITGB4/WASF3/SBF2/TSPAN2/LPIN1/TLR2/DHH/ERBB2/RXRG/MALL/ANK2/MAL2/PARD3/TENM4/LGI4/JAM2/MARVELD1/SKI/B4GALT5/MPZ/NCSTN/NFASC/JAM3/ILK/KLK6/SH3TC2/CMTM8/TPPP/PTEN/ID4/ABCD2/UGT8/KCNJ10/AMIGO1/CLDN5/CNTN2/SCN8A/HES5/LPAR1/ZNF488	69	0.485915
GO:0007163	BP	GO:0007163	establishment or maintenance of cell polarity	106/6492	234/18903	0.000313049	0.0052875	0.00398442	PAFAH1B1/PKD1/LRRC7/SPDL1/MAP4/MYO9A/PRKCZ/ROCK1/FGF10/FBXW11/LLGL2/CLASP1/FSCN1/ACTB/SPAG5/CAMSAP3/OPHN1/NDC80/ABL1/SH3BP1/FERMT1/LAMA1/FOXF1/LIN7B/SIPA1L3/FSCN3/LHX2/KANK1/GATA3/RAB11FIP2/RND2/IFT20/TCIRG1/UST/CAP2/PTK7/WWC1/AMOTL2/HES1/FRMD4B/CENPA/RND3/PARD3B/RHOQ/SFRP5/TEK/GPSM2/NCKAP1L/PARD6B/KIF25/TCF15/RHOJ/FOXJ1/FGF13/MAP1B/ROCK2/CRB1/KIAA1614/SPRY2/KIF20B/KIF2C/SNX27/RHOB/GSN/CRB2/PARD3…	106	0.452991
GO:0031214	BP	GO:0031214	biomineral tissue development	82/6492	174/18903	0.000315958	0.00531279	0.00400347	IGF1/IBSP/GPM6B/ROCK1/IFT80/PTGS2/MEF2C/SNX10/PTHLH/P2RX7/GATA1/PHEX/ERCC2/COMP/BMPR1A/MINPP1/TCIRG1/CYP27B1/MGP/FBXO5/ACVR2B/ITGB6/WNT6/WLS/SPP1/TGFB3/SRGN/SOX9/BMP2/SBDS/OMD/TRPM4/ENAM/ROCK2/HEY2/TFAP2A/MMP20/MMP13/BMPR1B/FBN2/SLC24A4/TUFT1/ECM1/OSR1/AHSG/RSPO2/DMP1/MEPE/KLF10/PTH1R/ALOX15/DDR2/PKDCC/CLEC3B/SGMS2/HEY1/NOS3/WDR72/GREM1/STIM1/KLK4/LTBP3/ROR2/ADRB2/S1PR1/TSPEAR/ANO6/FAM83H/SLC8A1/…	82	0.471264
GO:0071241	BP	GO:0071241	cellular response to inorganic substance	104/6492	229/18903	0.000316189	0.00531279	0.00400347	AOC1/SYT7/DDX11/DPEP1/SYT13/CDH1/HSPA5/GUCA1A/RAD51/MEF2A/RASGRP2/PTGS2/MEF2C/ATRX/ITPKC/ADD1/HMOX1/CPNE6/NFATC4/MMP9/EEF2K/RASA4/TFR2/PPIF/HSD17B1/KCNA1/TIMELESS/ECT2/NFE2L2/MTR/PKD2/ADCY7/CDK2/MT1G/SLC25A23/FOSB/TRAF2/SYT5/JUND/SERPINF1/SYT11/P2RX4/TFAP2A/ITPKA/CARF/CYP1A1/CYP1A2/IQGAP1/SLC13A5/TRPM2/ADCY10/ITPKB/CPNE9/SNCA/CAMK2D/CCNA2/CRHBP/ALAD/DLG2/FOXO1/NEK7/KCNB1/ATP13A2/ALOX15/PRKAA2/NCS…	104	0.454148
GO:0030326	BP	GO:0030326	embryonic limb morphogenesis	59/6492	118/18903	0.000318529	0.00532445	0.00401226	DLX6/MKS1/PITX1/TP63/RARB/GRHL2/BAX/TBX5/SALL4/FGF9/SALL1/MEGF8/DLX5/HOXA13/BMPR1A/FGF8/DKK1/WNT3/B9D1/MYH3/ZBTB16/TBX2/TBX4/RECK/HOXC11/RUNX2/NOTCH2/LRP4/TFAP2A/FRAS1/FBN2/SMAD4/OSR1/AFF3/SFRP2/RSPO2/FREM2/CACNA1C/MBNL1/BCL2L11/WNT7A/SKI/FLVCR1/EN1/MSX1/IHH/HAND2/SP8/SHH/FZD6/GREM1/SHOX2/CHST11/CHD7/TMEM107/HOXC10/PBX1/PTCH1/DYNC2H1	59	0.5
GO:0035113	BP	GO:0035113	embryonic appendage morphogenesis	59/6492	118/18903	0.000318529	0.00532445	0.00401226	DLX6/MKS1/PITX1/TP63/RARB/GRHL2/BAX/TBX5/SALL4/FGF9/SALL1/MEGF8/DLX5/HOXA13/BMPR1A/FGF8/DKK1/WNT3/B9D1/MYH3/ZBTB16/TBX2/TBX4/RECK/HOXC11/RUNX2/NOTCH2/LRP4/TFAP2A/FRAS1/FBN2/SMAD4/OSR1/AFF3/SFRP2/RSPO2/FREM2/CACNA1C/MBNL1/BCL2L11/WNT7A/SKI/FLVCR1/EN1/MSX1/IHH/HAND2/SP8/SHH/FZD6/GREM1/SHOX2/CHST11/CHD7/TMEM107/HOXC10/PBX1/PTCH1/DYNC2H1	59	0.5
GO:0001658	BP	GO:0001658	branching involved in ureteric bud morphogenesis	34/6492	60/18903	0.000321457	0.00534577	0.00402832	SOX8/PAX2/SIX4/SALL1/EYA1/FGF8/WNT6/TCF21/PKD2/SOX9/PAX8/BMP2/SIX1/WNT2B/MYC/FGF2/GREB1L/SMAD4/ADAMTS16/HS3ST3A1/SHH/ILK/DCHS1/GREM1/GDNF/BCL2/CTNNBIP1/MAGED1/WT1/PBX1/PTCH1/FOXD1/HOXB7/LHX1	34	0.566667
GO:0055008	BP	GO:0055008	cardiac muscle tissue morphogenesis	34/6492	60/18903	0.000321457	0.00534577	0.00402832	PKP2/COL11A1/TGFBR3/LRP2/FKBP1A/MYLK2/SMAD7/WNT2/BMPR1A/HAND1/TNNC1/PROX1/TNNT2/BMP2/TNNI3/HEY2/TPM1/SMAD4/ANKRD1/EDNRA/POU4F1/TNNI1/ACTC1/MYL3/FOXH1/TBX20/ZFPM2/S1PR1/CHD7/HEG1/TCAP/ZFPM1/NKX2-5/RYR2	34	0.566667
GO:0055002	BP	GO:0055002	striated muscle cell development	38/6492	69/18903	0.000323504	0.00536602	0.00404358	MYOM2/MEF2A/ACTN2/SIX4/MYL9/TNNT1/PRKAR1A/MYH3/SRF/PROX1/TNNT2/LDB3/FLNC/TMOD2/MYH11/FHOD3/PDGFRA/TMOD1/MYPN/TPM1/SMAD4/ACTA1/ANKRD1/ITGB1/PGM5/CSRP1/ACTC1/ANKRD23/LMOD3/LMOD1/CFL2/AKAP13/MYOZ2/TCAP/CSRP2/NKX2-5/NEB/KLHL41	38	0.550725
GO:0086003	BP	GO:0086003	cardiac muscle cell contraction	41/6492	76/18903	0.000344442	0.0056987	0.00429428	ATP1A2/DSG2/KCNH2/PKP2/ABCC9/KCNN2/SNTA1/SCN1B/CAV1/PDE4D/NUP155/KCNJ8/FGF13/KCNA5/TRPM4/DSC2/BIN1/HCN4/CAMK2D/ANK2/GSN/SCN2B/CACNA1C/KCNE4/GPD1L/CACNA2D1/RNF207/STC1/KCNJ3/ADORA1/CACNB2/SCN3B/SGCD/KCND3/SCN4B/GJC1/CTNNA3/PDE4B/FLNA/PLN/RYR2	41	0.539474
GO:0061005	BP	GO:0061005	cell differentiation involved in kidney development	33/6492	58/18903	0.000354064	0.00583555	0.0043974	WWTR1/PAX2/MEF2C/PDGFB/MMP9/SALL1/GATA3/ACTA2/HES1/STAT1/TCF21/PAX8/LIF/FOXJ1/NOTCH2/EDNRB/YAP1/IQGAP1/OSR1/EDNRA/KLF15/SHH/GREM1/GDNF/MTSS1/LAMB2/CD34/WT1/PTCH1/MAGI2/POU3F3/CD24/LHX1	33	0.568966
GO:0046683	BP	GO:0046683	response to organophosphorus	63/6492	128/18903	0.000354517	0.00583555	0.0043974	KDM1A/HSPA5/ABCC9/SREBF1/PTGS2/RAPGEF3/CRLS1/P2RX7/SLC26A3/EZR/HCN2/GATA1/EEF2K/AQP9/SLC5A5/P2RX1/AREG/STAT1/IGFBP5/RAP1A/PKD2/FOSB/VGF/CDO1/TRPM4/RFC3/P2RX4/PNPT1/CYP1B1/HCN4/TRPC3/GATA6/PKLR/HCN3/CNGA3/SRD5A1/CRHBP/AKAP6/PPARGC1B/PFKFB1/STC1/INHBB/HSP90B1/P2RY12/P2RY1/FOS/P2RY6/PDE3A/FOSL1/TYMS/PER1/PENK/SLC8A1/WT1/ZFP36L1/PDE2A/KCNJ11/ENPP1/LPAR1/RYR3/SLC26A6/AQP1/PDXP	63	0.492188
GO:0042310	BP	GO:0042310	vasoconstriction	44/6492	83/18903	0.000355628	0.00583899	0.00439999	PIK3C2A/ATP1A2/PTGS2/MMP2/ABL1/SNTA1/HTR2A/COMP/CAV1/ACTA2/P2RX1/TACR1/FAAH/ADRA1A/BBS2/AVPR2/KCNA5/TRPM4/PER2/CRP/CHRM3/MTNR1B/HTR1B/HTR2B/EDNRB/AGTR1/ADRA2A/EDNRA/AVPR1A/BDKRB2/DRD5/FGG/FGA/FGB/ADRA1D/CYSLTR1/HTR1D/OXTR/F2R/SLC8A1/SMTNL2/BMPR2/SMTNL1/ADRA2B	44	0.53012
GO:0006836	BP	GO:0006836	neurotransmitter transport	97/6492	212/18903	0.000358693	0.00587439	0.00442666	SLC6A13/SLC6A7/SYT7/ATP1A2/APBA2/GPM6B/PFN2/CAMK2A/TACR2/STXBP2/SLC1A3/RIMS1/MEF2C/P2RX7/HRH3/SNPH/HTR2A/SLC6A2/LIN7B/SLC17A7/SLC1A6/GRIK5/STX1A/APBA1/GIT1/P2RX1/NRXN2/SLC6A12/SLC38A1/STX2/CSPG5/OTOF/RAB3GAP1/RAP1A/KMO/RIMS3/ADRA1A/GIPC1/NR4A1/GRM4/SYNGR3/SYT5/UNC13A/SLC6A8/SLC6A6/SLC6A11/PER2/SYT11/SLC38A2/HTR1B/STX11/STXBP1/UNC13C/SLC28A2/PREPL/SNCA/CPLX2/SLC22A3/CASK/CHRNA6/DOC2A/ITGB1/ADRA2A/…	97	0.457547
GO:0042116	BP	GO:0042116	macrophage activation	55/6492	109/18903	0.000373472	0.00610099	0.00459742	CX3CL1/SLC11A1/IFI35/RORA/CST7/CD200/TREM2/JAK2/BPI/CTSC/IFNG/FOXP1/IL1RL1/PLA2G4A/MMP8/CLU/NMI/CD93/WNK4/TICAM1/LBP/LDLR/JUND/SYT11/DYSF/IL6/TLR4/IL33/TLR2/THBS1/CRTC3/SNCA/TTBK1/MFHAS1/ATM/IFNGR2/TLR3/CSF2/IL31RA/LRFN5/CX3CR1/IL13/PRKCE/SPHK1/JUN/MAPT/LRRK2/SHPK/STK39/SUCNR1/PJA2/FCGR3A/AGER/MIF/CEBPA	55	0.504587
GO:0001836	BP	GO:0001836	release of cytochrome c from mitochondria	32/6492	56/18903	0.000389576	0.006305	0.00475115	GGCT/PLAUR/BID/IGF1/HGF/BAK1/BAX/MMP9/PYCARD/BMF/PDCD5/TIMM50/BBC3/PPIF/SOD2/CLU/IFI6/BCL2L2/HRK/CIDEB/BCL2L11/PINK1/LMNA/GPER1/MOAP1/TRIAP1/BCL2L1/BCL2/BOK/FZD9/MLLT11/GPX1	32	0.571429
GO:0009886	BP	GO:0009886	post-embryonic animal morphogenesis	12/6492	15/18903	0.000389859	0.006305	0.00475115	BAK1/ATRX/BAX/EFEMP1/MFAP2/NKX2-3/KDR/CRB1/MYO7A/BCL2L11/FBN1/HMGN1	12	0.8
GO:0030174	BP	GO:0030174	regulation of DNA-templated DNA replication initiation	12/6492	15/18903	0.000389859	0.006305	0.00475115	MCM2/MCM6/MCM5/MCM4/MCM3/GMNN/CDK2/WRNIP1/TICRR/MCM7/CDT1/MCIDAS	12	0.8
GO:0043970	BP	GO:0043970	histone H3-K9 acetylation	12/6492	15/18903	0.000389859	0.006305	0.00475115	BRCA1/SPHK2/SMARCB1/PIH1D1/GATA3/KAT2B/KMT2A/SMAD4/CHEK1/CRTC2/PWWP2B/NAP1L2	12	0.8
GO:0007044	BP	GO:0007044	cell-substrate junction assembly	49/6492	95/18903	0.000397049	0.00640527	0.00482671	MYOC/VCL/EPHA3/GPM6B/ARHGAP6/LAMA3/SLK/ROCK1/ACTN1/FERMT2/CLASP1/CAMSAP3/ACTN2/COL16A1/SORBS1/ABL1/CORO2B/SFRP1/DUSP3/CORO1C/DUSP22/HRG/TEK/MACF1/KDR/AJUBA/ITGB4/ROCK2/LAMC1/TLN1/THBS1/ACVRL1/PHLDB2/DST/MMP14/ITGA5/DLC1/GREM1/FAM107A/BCL2/PTEN/RHOD/PEAK1/RCC2/APOD/SRC/STON1/ACTN3/ITGB3	49	0.515789
GO:0035265	BP	GO:0035265	organ growth	84/6492	180/18903	0.000399248	0.00641681	0.00483541	ARX/JARID2/IGF1/IFT80/TGFBR3/FGF10/EVC/ACACB/RARB/TP73/MEF2C/KCNK2/TBX5/ESR1/ABL1/FGF9/COMP/WNT2/BMPR1A/FGF8/PRKAR1A/GLI1/WWC1/ACVR2B/FOXP1/LEPR/RGS2/PROX1/ADRA1A/TBX2/SOX9/PARP2/DUSP9/RARA/IER3IP1/CGA/HEY2/SPRY2/PIM1/YAP1/MMP13/FGF2/FGF7/GATA6/ECM1/RSPO2/TENM4/LATS2/AKAP6/WWC2/BCL2L11/SORBS2/CXADR/SKI/STC1/G6PD/DDR2/FLVCR1/PDLIM5/TGFBR2/CITED2/PI16/TBX20/SHH/MESP1/IGF2/AR/ZFPM2/CDK1/AKAP13/S1PR1…	84	0.466667
GO:0007178	BP	GO:0007178	transmembrane receptor protein serine/threonine kinase signaling pathway	166/6492	390/18903	0.000399749	0.00641681	0.00483541	ITGA3/TFAP2B/ZC3H3/WWTR1/VIM/ARID4A/HSPA5/LTBP1/DKK3/DLX3/NEO1/TGFBR3/FGF10/FERMT2/ITGA8/LRP2/NLK/FKBP1A/LTBP4/CHRD/HIVEP1/SIRT1/JAK2/ABL1/BRMS1L/HNF4A/FERMT1/SMAD7/CHRDL1/FGF9/NUP93/ZNF423/SFRP1/AMH/MEGF8/COMP/DLX5/CAV1/HOXA13/BMPR1A/DKK1/PBLD/MTMR4/FOLR1/BMP5/DUSP22/TTK/HES1/ACVR2B/ITGB6/SPTBN1/BMP8B/ONECUT2/TGFB3/SFRP5/SMAD9/EGR1/FMOD/INHBA/GIPC1/LRP1/TNFAIP6/INHA/PMEPA1/RUNX2/BMP2/TMEM53/WFIK…	166	0.425641
GO:0060560	BP	GO:0060560	developmental growth involved in morphogenesis	105/6492	233/18903	0.000420324	0.00673038	0.0050717	SEMA3F/PAFAH1B1/SPAG9/SEMA3G/VCL/CDH1/RTN4R/CYFIP2/NTN1/PRKCZ/FGF10/SEMA3A/SPAG6/RIMS1/RAB21/ULK2/AURKA/NRCAM/ESR1/DPYSL2/SEMA4G/ABL1/SIX4/CPNE6/SALL1/SFRP1/PTPRS/MEGF8/MAG/LIMK1/LHX2/CXCL12/PPP3CB/WNT3/RND2/AREG/WASF1/PTK7/SRF/PLXNA1/NRP2/SPP1/TNN/TBX2/CXCR4/NRN1/SOX9/SIX1/MACF1/FGF13/UNC13A/OLFM1/TRIM28/PLXNA3/MAP1B/DCLK1/NGF/EPHA7/SEMA4F/EMX1/SPRY2/KIAA0319/YAP1/SEMA6D/ST8SIA2/IQGAP1/NKD1/CPNE…	105	0.450644
GO:0051962	BP	GO:0051962	positive regulation of nervous system development	123/6492	279/18903	0.00042757	0.0068295	0.00514639	KDM1A/SOX8/CX3CL1/PAFAH1B1/SS18L2/CUL7/CAMK2B/NTN1/ASPM/WDR62/PLXNA2/TP73/DCT/RAB21/LRP2/SMARCD3/E2F1/CBLN1/FBXO31/EEF2K/NUMBL/MEGF8/MAG/WNT2/LIMK1/CXCL12/NEURL1/WNT3/ASPA/RND2/MDK/IFNG/NR2E1/SRF/HES1/PLXNA1/ID2/EPHA4/SLITRK3/CXCR4/EGR2/NKX2-2/BMP2/MACF1/LIF/RNF112/PLXNA3/LRRC4B/MAP1B/SERPINF1/EPHB2/NGF/IL6ST/IL6/BIN1/IL33/TLR2/ITPKA/ZNF365/FGF2/CLSTN3/AMIGO2/ST8SIA2/DMRTA2/SLIT2/LRRTM2/TTBK1/TIA…	123	0.44086
GO:0048709	BP	GO:0048709	oligodendrocyte differentiation	51/6492	100/18903	0.000433543	0.00690785	0.00520543	SOX8/CNTN1/TP73/SLC8A3/FA2H/ERCC2/MAG/ASPA/CNTNAP1/MDK/SOX6/HES1/DLX2/CLU/CXCR4/PLP1/MYRF/SOX9/NKX2-2/NSUN5/WASF3/TRPC4/TSPAN2/NKX2-1/IL33/TLR2/ZNF365/ERBB2/GPR17/DLX1/DAAM2/TENM4/PRDM8/IL34/B4GALT5/SLC45A3/NCSTN/NKX6-1/SHH/CDK5/TPPP/PTEN/ID4/BOK/SOX11/KCNJ10/CNTN2/HES5/LPAR1/LYN/ZNF488	51	0.51
GO:0046328	BP	GO:0046328	regulation of JNK cascade	68/6492	141/18903	0.00044332	0.00704628	0.00530975	WNT16/PAFAH1B1/MAPK8IP2/ZMYND11/TRAF1/SEMA3A/TRAF4/MAGI3/TRAF5/CYLD/GADD45B/BIRC7/RASSF2/PYCARD/RIPK2/SFRP1/AMBP/DUSP3/HIPK3/LTBR/TPD52L1/DUSP22/IL1A/GADD45A/SLAMF1/MMP8/TNFSF11/MAPK8IP1/UNC5CL/PRMT1/TRAF2/GADD45G/MAP3K10/EDA2R/GPS2/MEN1/ANKRD6/DAB2IP/TLR4/SDCBP/MAPKBP1/MARVELD3/NCOR1/SFRP2/MFHAS1/PDCD4/DIXDC1/TNIK/WNT7A/EPHB1/FZD7/PINK1/FGF19/DUSP19/TLR3/DACT1/MAP4K2/CCL19/SH3RF3/HRAS/PER1/MTURN…	68	0.48227
GO:0048015	BP	GO:0048015	phosphatidylinositol-mediated signaling	83/6492	178/18903	0.000444488	0.00704753	0.00531069	WNT16/PIK3C2A/DCN/IGF1/HGF/GAB2/MYOC/PREX2/LTK/ERBB3/MYDGF/FGFR1/PITPNM2/TYRO3/EZR/TREM2/SIRT1/JAK2/PDGFB/PLCB4/PPP1R16B/HTR2A/MAZ/PIK3R2/PIP5K1B/GATA3/UNC5B/CRYBA1/CSF3/PTPN6/NPR3/PLCH1/PLCD4/PLCL1/CD160/TEK/CAT/FLT3/SOX9/KDR/PDGFRA/PRR5L/HTR2B/DAB2IP/CEP55/FGF2/PIK3C2G/NTRK3/ERBB2/NYAP2/PDGFC/PIK3R1/OGT/INPP5E/PLCB3/ANGPT1/KIT/PLXNB1/GPER1/SERPINA12/NLRC3/IRS1/ROR2/SEMA3E/FSHR/PDGFD/PTEN/SELP/C…	83	0.466292
GO:0030308	BP	GO:0030308	negative regulation of cell growth	87/6492	188/18903	0.000447219	0.0070735	0.00533026	SEMA3F/SPAG9/SEMA3G/PRDM11/FHL1/CDH1/RTN4R/SPHK2/NTN1/IP6K2/CDHR2/ENO1/SEMA3A/JADE1/SMARCA2/ULK2/SEMA4G/SIRT1/CGRRF1/BDKRB1/HNF4A/WFDC1/SFRP1/PTPRS/MAG/WNT3/CRYAB/CYP27B1/HRG/BCL6/HYAL1/FOXP1/RGS2/SPP1/INHBA/CDKN1A/SMARCA4/FGF13/BST2/PLXNA3/BTG1/PSRC1/RERG/EPHA7/SEMA4F/KIAA0319/SEMA6D/ACVRL1/PML/SMAD4/ADAM15/SLIT2/SFRP2/CDKN2A/CDA/G6PD/DRAXIN/MSX1/TRIM46/PI16/SOX17/CDK5/DCSTAMP/GREM1/SERTAD3/SEMA…	87	0.462766
GO:0001547	BP	GO:0001547	antral ovarian follicle growth	9/6492	10/18903	0.000457766	0.0071876	0.00541624	ESR1/FOXO3/TNFAIP6/EREG/BMPR1B/SCAPER/PTX3/GPR149/ZP3	9	0.9
GO:0003211	BP	GO:0003211	cardiac ventricle formation	9/6492	10/18903	0.000457766	0.0071876	0.00541624	MEF2C/SMARCD3/TBX5/HAND1/SOX4/HAND2/MESP1/SOX11/NKX2-5	9	0.9
GO:0071421	BP	GO:0071421	manganese ion transmembrane transport	9/6492	10/18903	0.000457766	0.0071876	0.00541624	ATP2C1/SLC11A1/ATP2C2/SLC39A14/ATP13A1/TMEM165/SLC39A8/TRPM2/SLC30A10	9	0.9
GO:0033028	BP	GO:0033028	myeloid cell apoptotic process	24/6492	39/18903	0.000467541	0.0073233	0.0055185	KITLG/MEF2C/APOH/SIRT1/GATA1/THRA/IRF3/EPO/ANXA1/IL6/ITPKB/CDKN2A/SLC7A11/ADAM17/BCL2/PTEN/STAT5B/CXCR2/HCAR2/GAS6/IRF7/MIF/PLEKHO2/CLEC5A	24	0.615385
GO:0048545	BP	GO:0048545	response to steroid hormone	146/6492	339/18903	0.000472593	0.00735744	0.00554422	TFPI/FKBP4/KDM1A/CALCR/CRY1/BRCA1/CALCOCO1/ATP1A2/LMO3/CYBA/PTPRU/MAOB/SREBF1/TP63/PTGS2/PGR/TFAP4/ESR1/SIRT1/JAK2/ACR/RBFOX2/PCK2/ACSBG1/SFRP1/ATP1A3/CAV1/GHRHR/PTGDS/AREG/UFSP2/CCND1/SCGB2A2/MDK/RWDD1/NR2E1/GHR/NR3C1/BCHE/FOXP1/TACR1/IGFBP2/ERRFI1/PADI2/SGK1/TCF21/FOXO3/SPP1/KLF9/NR4A3/TGFB3/CRY2/FLT3/DDX54/PMEPA1/FOSB/NKX2-2/SMARCA4/ZFP36/MYOD1/CDO1/EPO/SERPINF1/PCNA/CASP9/DSG1/CLOCK/ANXA1/HTR…	146	0.430678
GO:0051895	BP	GO:0051895	negative regulation of focal adhesion assembly	13/6492	17/18903	0.00047427	0.00735744	0.00554422	ARHGAP6/CORO1C/DUSP22/THBS1/ACVRL1/PHLDB2/MMP14/DLC1/FAM107A/PTEN/RCC2/APOD/SRC	13	0.764706
GO:0097107	BP	GO:0097107	postsynaptic density assembly	13/6492	17/18903	0.00047427	0.00735744	0.00554422	CBLN1/NRXN2/SLITRK3/LRRC4B/NTRK3/LRRTM2/PTPRD/ZDHHC12/NPTX1/PTEN/LRFN4/NRXN1/IL1RAP	13	0.764706
GO:0150118	BP	GO:0150118	negative regulation of cell-substrate junction organization	13/6492	17/18903	0.00047427	0.00735744	0.00554422	ARHGAP6/CORO1C/DUSP22/THBS1/ACVRL1/PHLDB2/MMP14/DLC1/FAM107A/PTEN/RCC2/APOD/SRC	13	0.764706
GO:0043583	BP	GO:0043583	ear development	100/6492	221/18903	0.000477059	0.007383	0.00556349	DLX6/PAFAH1B1/MKS1/MCOLN3/COL11A1/NTN1/FGF10/MCM2/PAX2/ITGA8/KCNK2/MYO15A/MYO3A/PVALB/SIX4/FGF9/EYA1/CALB1/ESRP1/HPN/DLX5/HOXA13/LHX3/GATA3/FGF8/IFT20/NKX3-2/BMP5/EYA4/SOBP/PTK7/TBX18/HES1/OTX1/ATP6V1B1/EPHA4/MYCL/KCNQ4/PROX1/TGFB3/TBX2/SOX9/PAX8/BMP2/TCF15/SIX1/EPHB2/HEY2/SPRY2/TFAP2A/MYO7A/ADAM10/STRA6/FGF2/COL2A1/LGR5/NTRK3/OSR1/LRIG1/CCNA2/SHROOM2/ZEB1/FREM2/EDNRA/ZIC1/BCL2L11/MSX1/HESX1/BMPE…	100	0.452489
GO:0046434	BP	GO:0046434	organophosphate catabolic process	76/6492	161/18903	0.000481722	0.00743738	0.00560446	DERA/TYMP/ENTPD2/INPP5A/SCARB1/ACAT1/UNG/SYNJ2/ACOT7/ABHD12/SAMHD1/LIPG/GDPD3/PLA2G15/MLYCD/PLA2G4C/INPP4B/DNPH1/PDE4D/PLA2G4A/NT5C1A/OCRL/NUDT10/SMUG1/NT5C/GPCPD1/ITPA/PLA2G5/LDLR/APOC1/PNPLA7/SMPDL3B/ANGPTL3/SMPD2/SUCLA2/NUDT15/SMPD4/ENPP2/ENTPD1/PDE5A/TDG/NEIL1/NUDT7/IMPA2/PLA2G7/INPP5E/INPP1/GPD1L/GDPD1/ENPP3/XDH/APOA2/PLB1/ENPP6/NUDT5/HPRT1/LIPC/NUDT8/PDE7B/PTEN/SMPDL3A/DCTPP1/PLCB1/PDE4B/PD…	76	0.47205
GO:0090092	BP	GO:0090092	regulation of transmembrane receptor protein serine/threonine kinase signaling pathway	127/6492	290/18903	0.000483266	0.00744139	0.00560748	ITGA3/TFAP2B/ZC3H3/ARID4A/HSPA5/LTBP1/DKK3/NEO1/TGFBR3/FGF10/ITGA8/LRP2/FKBP1A/LTBP4/CHRD/SIRT1/JAK2/ABL1/BRMS1L/FERMT1/SMAD7/CHRDL1/FGF9/NUP93/ZNF423/SFRP1/CAV1/HOXA13/BMPR1A/DKK1/PBLD/MTMR4/FOLR1/BMP5/TTK/HES1/ACVR2B/BMP8B/ONECUT2/TGFB3/SFRP5/INHBA/GIPC1/LRP1/TNFAIP6/INHA/PMEPA1/BMP2/TMEM53/WFIKKN1/RASL11B/KDR/MEN1/NOTCH2/KCP/SPRY2/NKX2-1/DMRT1/KIAA0319/SULF1/SDCBP/THBS1/EMILIN1/CILP/FBN2/ACVRL…	127	0.437931
GO:0009416	BP	GO:0009416	response to light stimulus	139/6492	321/18903	0.000484282	0.00744139	0.00560748	KDM1A/FBXL3/ABCC8/CRY1/ATP1A2/BAK1/USP2/GUCA1A/PER3/OPN3/POLD1/TMEM161A/ABCA7/BCL3/GNB5/CNGB1/PTGS2/TIPIN/SIRT6/SLC1A3/DCT/BAX/MMP2/MYO15A/MSH2/SIRT1/CIRBP/NFATC4/MMP9/ACTR5/CACNA1F/RS1/BMF/RP1/ADAM2/ERCC2/RGS9/RCVRN/IFT20/UNC119/MAPK10/CCND1/HYAL1/TANC1/REEP6/ID2/KMT2A/CRY2/CAT/POLK/CDKN1A/LRRN4/CEP250/GNGT1/OPN1SW/JUND/NPHP4/PER2/GUCY2D/PCNA/CASP9/MEN1/BHLHE40/MEIS2/CRB1/CLOCK/FBXL8/XPA/MYC/TRP…	139	0.433022
GO:0110148	BP	GO:0110148	biomineralization	84/6492	181/18903	0.00049666	0.00759754	0.00572515	IGF1/IBSP/GPM6B/ROCK1/IFT80/PTGS2/MEF2C/SNX10/PTHLH/P2RX7/GATA1/PHEX/ERCC2/COMP/BMPR1A/MINPP1/TCIRG1/CYP27B1/MGP/FBXO5/ACVR2B/ITGB6/WNT6/WLS/SPP1/TGFB3/SRGN/SOX9/BMP2/SBDS/OMD/TRPM4/ENAM/ROCK2/HEY2/TFAP2A/MMP20/MMP13/BMPR1B/FBN2/SLC24A4/TUFT1/ECM1/OSR1/AHSG/RSPO2/DMP1/MEPE/KLF10/PTH1R/ALOX15/DDR2/PKDCC/ADORA1/CLEC3B/SGMS2/HEY1/NOS3/WDR72/GREM1/STIM1/KLK4/LTBP3/ROR2/ADRB2/S1PR1/TSPEAR/ANO6/FAM83H/…	84	0.464088
GO:0030323	BP	GO:0030323	respiratory tube development	88/6492	191/18903	0.000496981	0.00759754	0.00572515	ITGA3/PKD1/FGF10/SREBF1/GLI2/TRAF4/TP73/HSPB11/PGR/GRHL2/TBX5/PCSK5/CTSZ/LAMA1/PHEX/FGF9/ESRP2/CRISPLD2/FOXF1/WNT2/AIMP2/PLOD3/LHX3/BMPR1A/FGF8/GLI1/TIMELESS/PTK7/SRF/HES1/ACVR2B/CLCN2/ITGB6/IGFBP5/ERRFI1/PROX1/TCF21/TGFB3/TBX2/TBX4/SOX9/THRA/KLF2/KDR/LIF/FOXJ1/CHI3L1/WNT2B/PDGFRA/SPRY2/NKX2-8/NKX2-1/YAP1/STRA6/FGF2/FGF7/CYP1A2/MYOCD/GATA6/ABCA12/CRH/RSPO2/NFIB/SLC7A11/FGF18/MMP14/SIM2/PKDCC/TGFB…	88	0.460733
GO:0021955	BP	GO:0021955	central nervous system neuron axonogenesis	23/6492	37/18903	0.000497968	0.00759754	0.00572515	MYCBP2/PAFAH1B1/GLI2/SCN1B/NR2E1/EPHA4/DCLK1/EPHB2/SLIT2/NFIB/NR4A2/EPHB1/B4GALT5/ARHGAP35/SPTBN4/CHRNB2/DRAXIN/NDEL1/PTEN/FBXO45/DCC/ADARB1/PLXNA4	23	0.621622
GO:0007272	BP	GO:0007272	ensheathment of neurons	69/6492	144/18903	0.000508582	0.00772305	0.00581973	CNTN1/HGF/TYMP/MYOC/CST7/EPB41L3/SLC8A3/FA2H/ACSBG1/ARHGEF10/ERCC2/PRX/MAG/ASPA/CNTNAP1/PMP22/CTSC/QKI/SLC25A12/KIF14/CLU/CXCR4/EGR2/PLP1/MYRF/ORMDL1/KLK8/NSUN5/RARA/ITGB4/WASF3/SBF2/TSPAN2/LPIN1/TLR2/DHH/ERBB2/RXRG/MALL/ANK2/MAL2/PARD3/TENM4/LGI4/JAM2/MARVELD1/SKI/B4GALT5/MPZ/NCSTN/NFASC/JAM3/ILK/KLK6/SH3TC2/CMTM8/TPPP/PTEN/ID4/ABCD2/UGT8/KCNJ10/AMIGO1/CLDN5/CNTN2/SCN8A/HES5/LPAR1/ZNF488	69	0.479167
GO:0008366	BP	GO:0008366	axon ensheathment	69/6492	144/18903	0.000508582	0.00772305	0.00581973	CNTN1/HGF/TYMP/MYOC/CST7/EPB41L3/SLC8A3/FA2H/ACSBG1/ARHGEF10/ERCC2/PRX/MAG/ASPA/CNTNAP1/PMP22/CTSC/QKI/SLC25A12/KIF14/CLU/CXCR4/EGR2/PLP1/MYRF/ORMDL1/KLK8/NSUN5/RARA/ITGB4/WASF3/SBF2/TSPAN2/LPIN1/TLR2/DHH/ERBB2/RXRG/MALL/ANK2/MAL2/PARD3/TENM4/LGI4/JAM2/MARVELD1/SKI/B4GALT5/MPZ/NCSTN/NFASC/JAM3/ILK/KLK6/SH3TC2/CMTM8/TPPP/PTEN/ID4/ABCD2/UGT8/KCNJ10/AMIGO1/CLDN5/CNTN2/SCN8A/HES5/LPAR1/ZNF488	69	0.479167
GO:0050654	BP	GO:0050654	chondroitin sulfate proteoglycan metabolic process	22/6492	35/18903	0.000527352	0.00798932	0.00602038	DCN/XYLT2/CHPF2/XYLT1/HYAL4/B3GAT2/HYAL1/CHST3/CHPF/IDUA/CHSY1/CSGALNACT1/B3GAT3/PXYLP1/CSGALNACT2/CYTL1/CHST11/DSEL/NDNF/B3GALT6/CHST13/BGN	22	0.628571
GO:0007292	BP	GO:0007292	female gamete generation	75/6492	159/18903	0.000537157	0.00809993	0.00610373	IGF1/ASPM/RPS6KA2/TRIP13/PTGS2/NDC80/PGR/MMP2/AURKA/SIRT1/CDC25B/AMH/AURKC/MDK/FBXO5/TTK/RGS2/FOXO3/MASTL/NCAPH/INHBA/TNFAIP6/EREG/MCM8/TOP2A/SPIRE1/DMRT1/PAQR5/BMPR1B/PDE5A/LGR5/BRCA2/HORMAD1/STRA8/DIAPH2/ATM/EDNRA/ADAMTS1/CCNB2/M1AP/NPR2/HSF2BP/MEIOB/TDRD5/INHBB/TDRD10/IHH/PTX3/PRDM9/NOS3/SOHLH1/METTL3/PLK1/BNC1/FSHR/PAQR8/BCL2/PDE3A/GPR149/FOSL1/TDRD6/TDRKH/PAQR7/FIGLA/FOXL2/TOB2/NANOS3/ZP3/NA…	75	0.471698
GO:0035051	BP	GO:0035051	cardiocyte differentiation	75/6492	159/18903	0.000537157	0.00809993	0.00610373	IGF1/MEF2A/TGFBR3/RARB/SIRT6/ACTN2/MEF2C/TBX5/ASB2/BMPR1A/DKK1/KAT2A/IFT20/FOLR1/SOX6/BVES/SRF/TBX18/HES1/FOXP1/RGS2/ACADM/PROX1/ADRA1A/TBX2/INHBA/BMP2/PARP2/RARA/KDM6B/MYH11/MYO18B/FHOD3/PDGFRA/HEY2/ALPK3/PRICKLE1/MYOCD/GATA6/SMAD4/SIK1/TENM4/ITGB1/PDCD4/AKAP6/EDNRA/SORBS2/CXADR/FZD7/ACTC1/G6PD/LMNA/SGCB/PDLIM5/SPRY1/PITX2/HAND2/CITED2/PI16/SOX17/GPER1/MESP1/GREM1/SHOX2/CDK1/SGCD/AKAP13/TCAP/CAL…	75	0.471698
GO:0007519	BP	GO:0007519	skeletal muscle tissue development	77/6492	164/18903	0.000543255	0.00817282	0.00615866	SOX8/ELN/CDON/HMG20B/PITX1/MEF2C/COL19A1/MYL6/TLL2/SIX4/ASB2/MYLK2/CAV1/MEOX2/PPP3CB/NEURL1/CNTNAP1/HLF/RBM24/BVES/MEF2D/TCF21/EGR1/POPDC2/EGR2/NLN/NR4A1/GPCPD1/SIX1/MYOD1/POPDC3/ITGA7/CHRND/UQCC2/CHRNA1/METTL21C/MYOCD/DMRTA2/RXRG/ACTA1/GTF3C5/ANKRD1/VAX1/EPHB1/KLHL40/SKI/RCAN1/BTG2/LEMD2/IGSF8/ATF3/LMOD3/CITED2/SHH/CDK5/CFL2/IGF2/ANKRD33/SHOX2/FOS/BCL2/MYOZ2/AKIRIN1/SOX11/ZBTB18/FOXL2/TBX1/SRPK3…	77	0.469512
GO:1902904	BP	GO:1902904	negative regulation of supramolecular fiber organization	79/6492	169/18903	0.000547796	0.00822202	0.00619573	FKBP4/TMSB10/MYOC/CAPG/ARHGAP6/CTNNA2/NAV3/PFN2/SPTB/CLASP1/ADD2/CAMSAP3/ADD1/TPX2/ARHGAP28/TREM2/PICK1/PFDN4/SPEF1/CORO2B/TJP1/CLIP3/MET/KANK1/CRYAB/SPTBN1/STMN1/CLU/VIL1/CGNL1/TMOD2/TTBK2/FGF13/LDLR/HIP1R/MAP1B/KANK4/SWAP70/FHOD3/APC/CKAP2/TMOD1/SPTBN5/EMILIN1/TRIM54/KATNB1/SMAD4/PFDN2/TMEFF2/PHLDB2/SLIT2/SNCA/PIK3R1/GSN/ADD3/EPS8/PLEKHH2/RHPN1/TMSB15A/WASF2/TMSB15B/F11R/SPTBN4/LMOD3/LMOD1/DLC1…	79	0.467456
GO:0006937	BP	GO:0006937	regulation of muscle contraction	81/6492	174/18903	0.000550879	0.0082299	0.00620167	EHD3/ATP1A2/DSG2/PKP2/CACNB1/PTGS2/ENO1/TACR2/PPP1R12B/SLC8A3/MYLK2/MYL9/SMAD7/DMPK/TNNT1/CAV1/P2RX1/CACNG1/KCNA1/SRF/PDE4D/TNNC1/TACR1/RGS2/TNNI3K/TNNT2/CASQ2/ADRA1A/NR4A1/FGF13/TNNI3/CNN1/HRC/TRPM4/TNNI2/CHRM3/MYBPH/SPX/DSC2/P2RX4/BIN1/HCN4/PDE5A/TPM1/MYOCD/CAMK2D/ANK2/ADRA2A/CACNA1C/CLIC2/KCNMA1/KIT/RNF207/STC1/TNNI1/MYL3/ADORA1/UCN/GPER1/ADRB2/TACR3/SPHK1/OXTR/CHRM2/F2R/SLC8A1/NKX2-5/CTNNA3/S…	81	0.465517
GO:0090087	BP	GO:0090087	regulation of peptide transport	85/6492	184/18903	0.000553065	0.0082299	0.00620167	ABCC8/NOS2/TFAP2B/SYT7/SREBF1/SIRT6/AACS/SLC8B1/JAK2/LRP5L/PICK1/PCK2/HNF4A/CDK16/CA2/SFRP1/STX1A/GHRHR/TFR2/PPP3CB/TCIRG1/IFNG/PASK/KLF7/TNFSF11/SOX4/PAX8/FOXA2/KCNA5/TRPM4/ANO1/NR0B2/PER2/GRP/MTNR1B/CLOCK/GLUL/IL6/BLK/UQCC2/PDX1/ADCYAP1/TRPM2/S100A8/ABCA12/EPHA5/CRHBP/HTR2C/CRH/SIDT2/ADRA2A/FOXO1/PFKM/KCNB1/GIP/INHBB/ADORA1/NKX6-1/UCN/SLC9B2/GPER1/RAB8B/STXBP4/MIDN/IRS1/MYRIP/KISS1/TRH/PRKCE/JA…	85	0.461957
GO:1904019	BP	GO:1904019	epithelial cell apoptotic process	66/6492	137/18903	0.000553499	0.0082299	0.00620167	E2F2/BID/BAX/ESR1/JAK2/ABL1/HMOX1/E2F1/CD40LG/RGCC/FGF21/GATA3/CCL2/WFS1/MDK/KRT18/NFE2L2/CD160/TNFAIP3/FOXO3/DNMT3A/TEK/ZFP36/KDR/PAK4/RAMP2/CASP9/IL6/DAB2IP/YAP1/THBS1/SIX3/CASP6/PDX1/GSN/PDCD4/EDNRA/CAST/ANGPT1/HIPK1/TGFBR2/HAND2/TERT/GPER1/IL13/BCL2L1/FGG/FGA/FGB/BCL2/SCG2/NDNF/CD248/BTC/BOK/ANO6/UMODL1/CDH5/NKX2-5/GAS6/ZFP36L1/PPARA/RYR2/BMPR2/HLA-G/ECSCR	66	0.481752
GO:0009648	BP	GO:0009648	photoperiodism	21/6492	33/18903	0.000554682	0.0082299	0.00620167	FBXL3/CRY1/USP2/PER3/ID2/CRY2/PER2/BHLHE40/CLOCK/FBXL8/PML/SIK1/FBXL17/AGRP/NR2F6/PPP1CA/PER1/ATOH7/FBXL6/FBXL22/PPP1CB	21	0.636364
GO:0033032	BP	GO:0033032	regulation of myeloid cell apoptotic process	21/6492	33/18903	0.000554682	0.0082299	0.00620167	KITLG/MEF2C/APOH/SIRT1/GATA1/THRA/EPO/ANXA1/ITPKB/CDKN2A/SLC7A11/ADAM17/BCL2/PTEN/STAT5B/CXCR2/HCAR2/GAS6/IRF7/MIF/CLEC5A	21	0.636364
GO:0035850	BP	GO:0035850	epithelial cell differentiation involved in kidney development	28/6492	48/18903	0.000563524	0.00830396	0.00625748	WWTR1/PAX2/MEF2C/PDGFB/MMP9/SALL1/GATA3/ACTA2/STAT1/PAX8/LIF/FOXJ1/NOTCH2/EDNRB/YAP1/IQGAP1/OSR1/EDNRA/KLF15/GREM1/GDNF/MTSS1/LAMB2/CD34/WT1/MAGI2/CD24/LHX1	28	0.583333
GO:0048483	BP	GO:0048483	autonomic nervous system development	28/6492	48/18903	0.000563524	0.00830396	0.00625748	SEMA3F/ARX/SOX8/TFAP2B/KIF26A/TP63/SEMA3A/GATA3/HES1/TLX2/NRP2/EGR2/SOX4/SIX1/PLXNA3/EDNRB/TFAP2A/ACKR3/GFRA3/EDNRA/HAND2/GBX2/GDNF/ISX/SOX11/TBX1/ADARB1/PLXNA4	28	0.583333
GO:1901976	BP	GO:1901976	regulation of cell cycle checkpoint	28/6492	48/18903	0.000563524	0.00830396	0.00625748	MAD1L1/CRY1/BRCA1/RAD51/THOC1/NDC80/BIRC5/WDR76/TELO2/TTI1/PROX1/DUSP1/XRCC3/CCNB1/CDCA8/BRCA2/INCENP/MAD2L1/PRAP1/CDT1/PBK/RFWD3/FEM1B/GEN1/AURKB/CHEK2/DDX39B/LCMT1	28	0.583333
GO:0007059	BP	GO:0007059	chromosome segregation	162/6492	382/18903	0.000569481	0.00837267	0.00630926	MAD1L1/NCAPD2/DPF1/BRCA1/DDX11/TACC3/CENPQ/CUL3/SPDL1/NDC1/SMARCD1/RAD18/TRIP13/NUP37/ACTB/SPAG5/SMC1B/ZCWPW1/KIF22/SMARCA2/NDC80/SMARCD3/ATRX/BIRC5/KIF4A/CDC6/SMARCB1/TOP3B/FAM83D/NAA10/CENPT/OIP5/ERCC2/AURKC/CCNE1/RECQL5/SMARCD2/NCAPG/FBXO5/TTK/NR3C1/SMC4/KAT2B/ECT2/CHMP3/WRAP73/MAD2L2/CDC20/NEK2/CENPF/KIF14/DUSP1/NCAPH/MND1/KIF18A/ZWINT/CENPK/HJURP/KIF25/XRCC3/DLGAP5/SMARCA4/KNSTRN/PHF10/CEP85…	162	0.424084
GO:0097106	BP	GO:0097106	postsynaptic density organization	20/6492	31/18903	0.000578672	0.0084885	0.00639654	OPHN1/CBLN1/CNTNAP1/NRXN2/SLITRK3/LRRC4/LRRC4B/NTRK3/TMEM108/LRRTM2/PTPRD/ZDHHC12/NLGN1/NPTX1/PTEN/LRFN4/NRXN1/RELN/IL1RAP/SYNGAP1	20	0.645161
GO:2001243	BP	GO:2001243	negative regulation of intrinsic apoptotic signaling pathway	51/6492	101/18903	0.000586188	0.0085793	0.00646496	KDM1A/PLAUR/BID/TMEM161A/PTGS2/ENO1/SIRT1/MMP9/CXCL12/PPIF/WFS1/SOD2/NME5/NFE2L2/TXNDC12/HELLS/CLU/MAPK8IP1/SNAI1/BCL2L2/EPO/FIGNL1/TPT1/MDM2/PDX1/MCL1/ACKR3/SFRP2/HYOU1/CREB3L1/PINK1/DDIAS/VDAC2/BDKRB2/USP47/TRIAP1/BCL2L1/BCL2/ATAD5/GRINA/RTKN2/MUC1/LRRK2/NOC2L/PPIA/SRC/DDX3X/MAGEA3/GPX1/MIF/INS	51	0.50495
GO:1903046	BP	GO:1903046	meiotic cell cycle process	96/6492	212/18903	0.000592435	0.00865016	0.00651836	NCAPD2/NSUN2/RAD51/NDC1/FOXJ2/ASPM/RPS6KA2/TRIP13/MOV10L1/ZCWPW1/NDC80/ATRX/RAD54L/AURKA/CDC25B/CCNE1/RAD51AP1/FBXO5/TTK/SMC4/CDC20/MASTL/NCAPH/MND1/KIF18A/CKS2/KLHDC3/EREG/HSPA2/PRDM7/LIF/TUBG1/PSMC3IP/TOP2A/FIGNL1/CCNA1/SPIRE1/ESPL1/BRIP1/SMC2/SLC2A8/DMRT1/BRCA2/SPATA22/P3H4/NUF2/HORMAD1/FANCD2/STRA8/ATM/INCENP/NCAPD3/EDNRA/DDX4/BCL2L11/EME1/FBXO43/BUB1B/CCNB2/CDC25C/M1AP/ANKLE1/HSF2BP/SYCE2/ME…	96	0.45283
GO:0031571	BP	GO:0031571	mitotic G1 DNA damage checkpoint signaling	19/6492	29/18903	0.000597715	0.00865016	0.00651836	GTSE1/FBXO31/CASP2/CCND1/CDK2/CDKN1A/MDM2/PML/ATM/PRAP1/RFWD3/CRADD/TRIAP1/PLK3/PIDD1/CHEK2/MUC1/GIGYF2/PRKDC	19	0.655172
GO:0043153	BP	GO:0043153	entrainment of circadian clock by photoperiod	19/6492	29/18903	0.000597715	0.00865016	0.00651836	FBXL3/CRY1/USP2/PER3/ID2/CRY2/PER2/BHLHE40/FBXL8/PML/SIK1/FBXL17/NR2F6/PPP1CA/PER1/ATOH7/FBXL6/FBXL22/PPP1CB	19	0.655172
GO:0060074	BP	GO:0060074	synapse maturation	19/6492	29/18903	0.000597715	0.00865016	0.00651836	CAMK2B/PALM/NFATC4/CHRDL1/NEURL1/IGSF21/CDC20/BCAN/DAB2IP/SYBU/NFIA/CX3CR1/NLGN1/NEUROD2/PTEN/NRXN1/RELN/ARHGEF15/NEFL	19	0.655172
GO:0099068	BP	GO:0099068	postsynapse assembly	19/6492	29/18903	0.000597715	0.00865016	0.00651836	CBLN1/NRXN2/SLITRK3/ARHGEF9/LRRC4B/EPHB2/LRP4/NTRK3/LRRTM2/PTPRD/WNT7A/ZDHHC12/NLGN1/NPTX1/PTEN/LRFN4/NRXN1/IL1RAP/NLGN3	19	0.655172
GO:0003205	BP	GO:0003205	cardiac chamber development	78/6492	167/18903	0.000610156	0.00878235	0.00661797	MKS1/PKP2/PRDM1/COL11A1/TGFBR3/MEF2C/LRP2/SMARCD3/KCNK2/GRHL2/FKBP1A/TBX5/SALL4/SMAD7/FOXF1/SALL1/PPP1R13L/DNAH11/WNT2/HOXA13/GATA3/BMPR1A/FGF8/CPE/BMP5/PTK7/SRF/HAND1/HES1/TNNC1/PROX1/TNNT2/NRP2/TEK/TBX2/SOX4/PAX8/BMP2/TNNI3/NOTCH2/HEY2/MDM2/STRA6/TPM1/MYOCD/GATA6/GREB1L/SMAD4/SLIT2/ANK2/SFRP2/EDNRA/POU4F1/ADAMTS1/TNNI1/MYL3/FOXH1/TGFBR2/HAND2/CITED2/TBX20/HEY1/NOS3/MESP1/SHOX2/ZFPM2/CHD7/HEG1/S…	78	0.467066
GO:0048745	BP	GO:0048745	smooth muscle tissue development	17/6492	25/18903	0.000612686	0.00878235	0.00661797	TFAP2B/MYLK/ITGA8/ZFAND5/SRF/PROX1/PKD2/TNN/SOX9/SIX1/STRA6/OSR1/IHH/TIPARP/SHH/EFEMP2/PTCH1	17	0.68
GO:0051984	BP	GO:0051984	positive regulation of chromosome segregation	17/6492	25/18903	0.000612686	0.00878235	0.00661797	RAD18/BIRC5/CDC6/NCAPG/SMC4/KAT2B/NCAPH/CCNB1/CDCA8/SMC2/NCAPG2/INCENP/SMC6/PRAP1/CDT1/AURKB/RCC2	17	0.68
GO:1903034	BP	GO:1903034	regulation of response to wounding	80/6492	172/18903	0.000613246	0.00878235	0.00661797	ENPP4/TFPI/ABCC8/PLAUR/RTN4R/MYLK/FERMT2/CLASP1/SCARF1/FAP/CPB2/APOH/PDGFB/FERMT1/WFDC1/PTPRS/CAV1/KANK1/ACTA2/GIT1/MDK/SMOC2/HBEGF/KNG1/HRG/PROC/NFE2L2/EPHA4/F3/SERPINC1/TNFAIP3/SPP1/CXCR4/PLAU/FOXA2/VIL1/KLK8/F12/APCS/EPHB2/PDGFRA/ANXA1/KLF4/KIAA0319/THBS1/EMILIN1/FGF2/MMRN1/CERS2/PHLDB2/CASK/ITGB1/ADRA2A/UBASH3B/USF1/DDR2/CLDN1/NOS3/CLDN3/ATP7A/NDEL1/PRKCE/FGG/FGA/FGB/PTEN/CLEC7A/CD34/HRAS/ANO…	80	0.465116
GO:0030324	BP	GO:0030324	lung development	86/6492	187/18903	0.000613875	0.00878235	0.00661797	ITGA3/PKD1/FGF10/SREBF1/GLI2/TP73/HSPB11/PGR/GRHL2/TBX5/CTSZ/LAMA1/PHEX/FGF9/ESRP2/CRISPLD2/FOXF1/WNT2/AIMP2/PLOD3/LHX3/BMPR1A/FGF8/GLI1/TIMELESS/PTK7/SRF/HES1/ACVR2B/CLCN2/ITGB6/IGFBP5/ERRFI1/PROX1/TCF21/TGFB3/TBX2/TBX4/SOX9/THRA/KLF2/KDR/LIF/FOXJ1/CHI3L1/WNT2B/PDGFRA/SPRY2/NKX2-8/NKX2-1/YAP1/STRA6/FGF2/FGF7/CYP1A2/MYOCD/GATA6/ABCA12/CRH/RSPO2/NFIB/SLC7A11/FGF18/MMP14/SIM2/PKDCC/TGFBR2/SPRY1/HHI…	86	0.459893
GO:0048017	BP	GO:0048017	inositol lipid-mediated signaling	84/6492	182/18903	0.000614995	0.00878235	0.00661797	WNT16/PIK3C2A/DCN/IGF1/HGF/GAB2/MYOC/PREX2/LTK/ERBB3/MYDGF/FGFR1/PITPNM2/TYRO3/EZR/TREM2/SIRT1/JAK2/PDGFB/PLCB4/PPP1R16B/HTR2A/MAZ/PIK3R2/PIP5K1B/GATA3/UNC5B/CRYBA1/CSF3/PTPN6/NPR3/PLCH1/PLCD4/PLCL1/CD160/TEK/CAT/FLT3/SOX9/KDR/PDGFRA/PRR5L/HTR2B/DAB2IP/CEP55/FGF2/PIK3C2G/NTRK3/ERBB2/NYAP2/PDGFC/PIK3R1/OGT/INPP5E/PLCB3/ANGPT1/KIT/PLXNB1/GPER1/SERPINA12/NLRC3/IRS1/ROR2/SEMA3E/FSHR/PDGFD/PTEN/SELP/C…	84	0.461538
GO:0099175	BP	GO:0099175	regulation of postsynapse organization	45/6492	87/18903	0.000621774	0.00885959	0.00667617	SEMA3F/PAFAH1B1/FYN/CAMK2B/NRCAM/ZDHHC15/CBLN1/EEF2K/NEDD9/TANC1/EPHA4/TNNI3K/NRP2/KIF1A/LRRC4B/EPHB2/EPHA7/ITPKA/ABI2/PPFIA2/NTRK3/LRRTM2/PTPRD/WNT7A/LRFN2/LRP8/PDLIM5/CDK5/EFNA1/IL1RAPL1/NLGN1/TANC2/NPTX1/PTEN/CFL1/LRFN4/CDK5R1/LRRK2/RELN/IL1RAP/DNM3/ARC/INS/GRIN2B/SRCIN1	45	0.517241
GO:0051090	BP	GO:0051090	regulation of DNA-binding transcription factor activity	189/6492	454/18903	0.000644285	0.00916017	0.00690268	KDM1A/DHX33/CX3CL1/PKD1/NLRP2/ZIC2/TRAF1/PRKCZ/HDAC4/BCL3/LRP6/CAMK2A/TCF3/TFRC/MID2/TRAF5/ERC1/CYLD/IRAK3/ESR1/CD200/SIRT1/JAK2/SMARCB1/HMOX1/RPS6KA5/NFKBIA/E2F1/SMAD7/CD40LG/RGCC/TRADD/PYCARD/RIPK2/PPP2CB/NFKBIB/AMH/CAV1/WNT2/EZH2/CSF3/CDK5RAP3/HDAC5/MAPK10/WFS1/PPARGC1A/GLI1/RWDD1/MDFI/SRF/DAP/HAND1/HES1/ID2/OPRD1/MAD2L2/PROX1/TNFAIP3/SGK1/PKD2/SFRP5/TNFSF11/CLU/TRIM25/CAT/PTGIS/FOXA2/RBCK1/BM…	189	0.4163
GO:0030199	BP	GO:0030199	collagen fibril organization	35/6492	64/18903	0.000653846	0.00927572	0.00698975	COL11A1/COL5A3/TLL2/MMP11/COMP/PLOD3/COL12A1/FMOD/P4HA1/COLGALT1/PXDN/LOXL2/ADAMTS7/CYP1B1/EMILIN1/ADAMTS14/COL2A1/LUM/P3H4/DPT/SFRP2/SERPINH1/ADAMTS12/DDR2/ATP7A/GREM1/TNXB/CRTAP/EFEMP2/COL14A1/OPTC/COL13A1/COLGALT2/COL11A2/SCX	35	0.546875
GO:0030010	BP	GO:0030010	establishment of cell polarity	71/6492	150/18903	0.000659002	0.00930805	0.00701411	PAFAH1B1/PKD1/SPDL1/MAP4/MYO9A/PRKCZ/ROCK1/FGF10/FBXW11/LLGL2/CLASP1/FSCN1/SPAG5/CAMSAP3/OPHN1/NDC80/ABL1/SH3BP1/FERMT1/LAMA1/FOXF1/SIPA1L3/KANK1/GATA3/RAB11FIP2/IFT20/TCIRG1/UST/PTK7/WWC1/AMOTL2/HES1/FRMD4B/CENPA/PARD3B/GPSM2/KIF25/TCF15/FOXJ1/FGF13/MAP1B/ROCK2/CRB1/SPRY2/KIF20B/SNX27/GSN/CRB2/PARD3/FEZ1/MPP7/ITGB1/WNT7A/EPHB1/KIF26B/SPRY1/MAD2L1/SHH/AMOTL1/JAM3/WEE1/NDEL1/PLK1/CCL19/CDH5/SCRIB/…	71	0.473333
GO:0031023	BP	GO:0031023	microtubule organizing center organization	71/6492	150/18903	0.000659002	0.00930805	0.00701411	PAFAH1B1/CEP68/BRCA1/CNTLN/PPP1R12A/FBXW11/CLASP1/TUBE1/WDR62/PCM1/NDC80/AURKA/SIRT1/RANBP1/CEP76/CEP152/ARHGEF10/MPDZ/KAT2A/MDM1/CEP72/KAT2B/CHMP3/GADD45A/NEK2/PKD2/CDK2/STIL/PARD6B/KIF25/CEP250/XRCC3/FOXJ1/CEP85/HAUS8/ROCK2/DZIP1/NAT10/KIAA1614/ODF2/KIF11/BRCA2/CEP131/PLK4/HAUS6/CHEK1/HAUS1/SASS6/PPP1R35/CCDC78/CCNF/SPICE1/CHMP4C/NDEL1/PLK1/SAC3D1/CEP120/ATF5/CDK1/CEP135/CCDC57/PDE4DIP/GEN1/XRC…	71	0.473333
GO:1901605	BP	GO:1901605	alpha-amino acid metabolic process	93/6492	205/18903	0.000663704	0.00935403	0.00704876	SLC25A13/NOS2/AASS/IYD/DPEP1/GCLM/OTC/ATP2B4/ALDH18A1/BCAT1/OAT/ASNS/ACAT1/DCT/ARG2/HAL/CAD/SEPHS1/GCAT/HNF4A/HAO1/AHCY/SMS/CRYM/IL4I1/BCAT2/PLOD3/ASPA/AADAT/SLC38A1/HGD/NIT2/ODC1/SLC25A12/KYNU/AGMAT/MTR/KMO/ALDH6A1/ASL/PPAT/MPST/GAD1/CDO1/IDO1/MCCC2/SCLY/BHMT2/PSAT1/GLUL/BAAT/SLC39A8/CSAD/HMGCLL1/PSPH/ADHFE1/SLC7A11/MAT1A/TDO2/HPD/GART/ALDH4A1/CBS/FTCD/NAGS/HAAO/GMPS/NOS3/ATP7A/NOXRED1/GPT2/GPT/…	93	0.453659
GO:0010675	BP	GO:0010675	regulation of cellular carbohydrate metabolic process	73/6492	155/18903	0.000667908	0.00939282	0.00707799	PDK4/PDK2/CRY1/IGF1/DGAT2/HDAC4/RORA/ACACB/SIRT6/ADCYAP1R1/DUSP12/C1QTNF3/GCKR/SORBS1/SIRT1/MLYCD/GIT1/KAT2A/PPARGC1A/NR3C1/KAT2B/PASK/SLC25A12/LEPR/ACADM/NLN/FOXA2/DYRK2/CBFA2T3/MAS1/RGN/LHCGR/NCOR1/RPTOR/FOXK2/SIK1/SNCA/IGFBP3/OGT/SOGA1/FOXO1/PDK1/RANBP2/PHKG2/PFKFB1/SLC45A3/PTH1R/GPER1/SERPINA12/IGF2/MIDN/GPT/DDIT4/STAT3/IRS1/P2RY1/PRKCE/ZNF692/P2RY6/PPP1CA/PPP1R3B/MST1/CLK2/PHLDA2/PGP/PPARA/S…	73	0.470968
GO:0045860	BP	GO:0045860	positive regulation of protein kinase activity	176/6492	420/18903	0.000672768	0.00944065	0.00711403	CAMKK1/DBF4/PKD1/GPRC5A/IGF1/SLC11A1/MAP2K3/KITLG/TAB2/ATP2B4/WNK1/LTK/ERBB3/PRKCZ/FERMT2/TRAF4/FGFR1/MEF2C/TPX2/P2RX7/PPP2R3C/CLSPN/CDC6/SIRT1/JAK2/ABL1/PDGFB/TCL1A/TELO2/CDC25B/RASSF2/CD40LG/HTR2A/RGCC/CEMIP/PIH1D1/EZH2/PRKAG2/BMPR1A/NEURL1/DKK1/UNC119/AREG/CCND1/IL23A/IFNG/NEDD9/TPD52L1/SASH1/GHR/HBEGF/PDCD10/ECT2/ACVR2B/EPHA4/RAP1A/PROX1/SLC8A2/KIF14/PKD2/CCND2/TNFSF11/EGR1/CLU/ADRA1A/PILRB/F…	176	0.419048
GO:0032872	BP	GO:0032872	regulation of stress-activated MAPK cascade	89/6492	195/18903	0.000675125	0.00945321	0.0071235	WNT16/PAFAH1B1/MAPK8IP2/ZMYND11/HGF/TRAF1/SEMA3A/TRAF4/MAGI3/TRAF5/CYLD/EZR/TREM2/GADD45B/BIRC7/RASSF2/PYCARD/RIPK2/SFRP1/AMBP/DUSP3/HIPK3/FOXM1/LTBR/IL26/TPD52L1/SASH1/DUSP22/PDCD10/IL1A/GADD45A/SLAMF1/MMP8/DUSP1/TNFSF11/MAPK8IP1/UNC5CL/BMP2/PRMT1/TRAF2/GADD45G/MAP3K10/EDA2R/GPS2/MEN1/ANKRD6/DAB2IP/TLR4/MYC/SDCBP/MAPKBP1/MARVELD3/NCOR1/SFRP2/MFHAS1/PDCD4/DIXDC1/FOXO1/TNIK/WNT7A/EPHB1/FZD7/XDH/PI…	89	0.45641
GO:0051056	BP	GO:0051056	regulation of small GTPase mediated signal transduction	132/6492	305/18903	0.000678439	0.00947487	0.00713982	ITGA3/IGF1/RALBP1/FAM13B/ARHGAP31/MYOC/CUL3/RTN4R/PREX2/ARHGAP6/KITLG/RASGRF1/PSD/CDON/MYO9A/FGF10/ARHGAP10/ARHGAP15/RAP1GAP/ADCYAP1R1/P2RY10/OPHN1/ARHGAP28/GMIP/ABL1/SYDE2/SH3BP1/SOS2/ARHGAP5/ARFGAP1/PPP2CB/ARHGEF10/SYDE1/SIPA1L3/RASA4/MET/KANK1/DNMBP/SHOC2/GIT1/LRRC59/ARHGEF17/APOC3/KCTD10/FOXM1/BCL6/ECT2/MFN2/SIPA1L2/STMN1/APOA1/KIF14/TRIM67/ADRA1A/ARHGAP40/FGD3/CGNL1/STARD8/EPO/ARHGEF9/RAP1GA…	132	0.432787
GO:0051494	BP	GO:0051494	negative regulation of cytoskeleton organization	77/6492	165/18903	0.000679601	0.00947487	0.00713982	FKBP4/BRCA1/TMSB10/MYOC/CAPG/ARHGAP6/CTNNA2/NAV3/PFN2/SPTB/CLASP1/ADD2/CAMSAP3/ADD1/TPX2/ARHGAP28/PICK1/SPEF1/CORO2B/TJP1/CLIP3/MET/KANK1/KAT2A/MDM1/KAT2B/SPTBN1/STMN1/VIL1/CGNL1/TMOD2/TTBK2/FGF13/HIP1R/MAP1B/KANK4/SWAP70/FHOD3/APC/CKAP2/TMOD1/SPTBN5/TRIM54/KATNB1/SMAD4/TMEFF2/PHLDB2/SLIT2/SNCA/PIK3R1/GSN/ADD3/EPS8/PLEKHH2/RHPN1/TMSB15A/WASF2/TMSB15B/F11R/SPTBN4/CCNF/LMOD3/LMOD1/DLC1/S1PR1/CORO1B…	77	0.466667
GO:0044774	BP	GO:0044774	mitotic DNA integrity checkpoint signaling	44/6492	85/18903	0.000695717	0.0096787	0.00729342	BRCA1/FOXN3/TIPIN/GTSE1/CDC14B/ORC1/CLSPN/CDC6/MSH2/FBXO31/CASP2/CDK5RAP3/CCND1/CCNG1/CDK2/CDKN1A/STK33/MDM2/PML/TICRR/DTL/FANCD2/ATM/CHEK1/EME1/DONSON/TOPBP1/PRAP1/PLK1/PBK/RFWD3/CRADD/CDK1/TRIAP1/RAD9A/PLK3/PIDD1/CHEK2/FOXO4/MUC1/BLM/EME2/GIGYF2/PRKDC	44	0.517647
GO:1901215	BP	GO:1901215	negative regulation of neuron death	98/6492	218/18903	0.000708745	0.00983269	0.00740945	CX3CL1/TFAP2B/GCLM/ERBB3/ROCK1/INPP5A/SNCB/MEF2C/BAX/CD200/TYRO3/MSH2/SIRT1/JAK2/HMOX1/SIX4/NFATC4/TOX3/FGF21/MAG/UNC5B/FGF8/CSF3/CCL2/WFS1/PPARGC1A/CCND1/MDK/NCOA7/SOD2/GHR/CPEB4/KIF14/NR4A3/TGFB3/SIX1/TRAF2/KDR/PARP2/EPO/SERPINF1/NES/VSTM2L/NGF/IL6ST/MTNR1B/AGAP2/FAIM2/STXBP1/HDGF/DLX1/SNCA/HYOU1/SLC7A11/ADAM8/POU4F1/NR4A2/ANGPT1/PINK1/ATP13A2/BTG2/DRAXIN/PM20D1/EN1/UCN/TERT/GRIK2/EN2/CDK5/AXL/…	98	0.449541
GO:0000022	BP	GO:0000022	mitotic spindle elongation	10/6492	12/18903	0.000711346	0.00983269	0.00740945	BIRC5/KIF4A/AURKC/CDCA8/KIF23/INCENP/RACGAP1/AURKB/PRC1/KIF4B	10	0.833333
GO:0072182	BP	GO:0072182	regulation of nephron tubule epithelial cell differentiation	10/6492	12/18903	0.000711346	0.00983269	0.00740945	WWTR1/PAX2/GATA3/STAT1/PAX8/LIF/YAP1/OSR1/CD24/LHX1	10	0.833333
GO:0000077	BP	GO:0000077	DNA damage checkpoint signaling	59/6492	121/18903	0.000724454	0.00995009	0.00749793	CRY1/BRCA1/RAD51/FOXN3/TIPIN/GTSE1/THOC1/CDC14B/WDR76/CLSPN/MSH2/TELO2/TTI1/E2F1/FBXO31/CASP2/CDK5RAP3/CCND1/CCNG1/FBXO6/CDK2/CDKN1A/STK33/CLOCK/MDM2/BRIP1/BRCA2/PML/TICRR/DTL/INTS7/FANCD2/ATM/CHEK1/EME1/DONSON/TOPBP1/ATRIP/PRAP1/PLK1/PBK/RFWD3/FEM1B/CRADD/CDK1/TRIAP1/RHNO1/RAD9A/PLK3/PIDD1/PTPN11/CHEK2/FOXO4/MUC1/BLM/EME2/DDX39B/GIGYF2/PRKDC	59	0.487603
GO:0032355	BP	GO:0032355	response to estradiol	59/6492	121/18903	0.000724454	0.00995009	0.00749793	FGF10/PTGS2/WNT8B/ADCYAP1R1/MMP2/ESR1/MMP15/SFRP1/EZH2/AREG/CRYAB/CCND1/TACR1/IGFBP2/DNMT3A/SOCS2/KIF18A/CAT/PTGFR/RAMP3/OPRL1/MYOD1/BCL2L2/ARPC1B/CCDC62/MAP1B/RARA/PCNA/CASP9/ANXA1/STXBP1/CYP1B1/DHH/SSTR1/CCNA2/SRD5A1/CRHBP/PAM/POU4F1/BCL2L11/WNT7A/IHH/UCN/GPER1/GJB2/STAT3/TACR3/STAT5B/CALR/TH/OXTR/NQO1/PENK/RUVBL2/PTCH1/STRN3/GPX1/GH1/TXNIP	59	0.487603
GO:2000278	BP	GO:2000278	regulation of DNA biosynthetic process	59/6492	121/18903	0.000724454	0.00995009	0.00749793	HGF/PNKP/JADE2/RFC2/SMG6/JADE1/KCNK2/GRHL2/PDGFB/GINS1/RGCC/DNAJC2/RFC5/SMOC2/NEK2/CDKN1A/CHTF18/DKC1/RGN/GINS2/PCNA/RFC3/MEN1/NAT10/PKIB/KLF4/DSCC1/MYC/CYP1B1/FGF2/ACVRL1/PIF1/WRAP53/NAF1/CCT6A/GINS4/ANKRD1/ATM/CHEK1/CCT5/NEK7/CCT8/CCT3/RFC4/CCT2/GREM1/PARM1/EXOSC10/DCP2/CTC1/AURKB/MAPK15/GINS3/SRC/TFDP1/SMG5/BMPR2/POLG2/DACH1	59	0.487603
GO:0086091	BP	GO:0086091	regulation of heart rate by cardiac conduction	25/6492	42/18903	0.000728917	0.00999018	0.00752813	DSG2/KCNH2/PKP2/HCN2/SCN1B/CAV1/KCNA5/TRPM4/DSC2/BIN1/HCN4/HCN3/CAMK2D/ANK2/SCN2B/CACNA1C/KCNE4/CACNA2D1/KCNJ3/CACNB2/SCN3B/KCND3/KCNH6/SCN4B/CTNNA3	25	0.595238
GO:0070302	BP	GO:0070302	regulation of stress-activated protein kinase signaling cascade	90/6492	198/18903	0.000743187	0.0101642	0.00765929	WNT16/PAFAH1B1/MAPK8IP2/ZMYND11/HGF/TRAF1/SEMA3A/TRAF4/MAGI3/TRAF5/CYLD/EZR/TREM2/GADD45B/BIRC7/RASSF2/PYCARD/RIPK2/SFRP1/AMBP/DUSP3/HIPK3/FOXM1/LTBR/IL26/TPD52L1/SASH1/DUSP22/PDCD10/IL1A/GADD45A/SLAMF1/MMP8/DUSP1/TNFSF11/MAPK8IP1/UNC5CL/BMP2/PRMT1/TRAF2/GADD45G/MAP3K10/EDA2R/GPS2/MEN1/ANKRD6/DAB2IP/TLR4/MYC/SDCBP/MAPKBP1/MARVELD3/NCOR1/SFRP2/MFHAS1/PDCD4/DIXDC1/FOXO1/TNIK/WNT7A/EPHB1/FZD7/XDH/PI…	90	0.454545
GO:0048839	BP	GO:0048839	inner ear development	88/6492	193/18903	0.000749384	0.010174	0.00766666	DLX6/PAFAH1B1/MKS1/MCOLN3/COL11A1/NTN1/FGF10/MCM2/PAX2/ITGA8/KCNK2/MYO15A/MYO3A/PVALB/SIX4/FGF9/EYA1/CALB1/ESRP1/HPN/DLX5/HOXA13/LHX3/GATA3/FGF8/IFT20/EYA4/SOBP/PTK7/TBX18/HES1/OTX1/ATP6V1B1/EPHA4/MYCL/KCNQ4/PROX1/TGFB3/TBX2/SOX9/PAX8/BMP2/SIX1/EPHB2/HEY2/SPRY2/TFAP2A/MYO7A/ADAM10/FGF2/COL2A1/LGR5/NTRK3/LRIG1/CCNA2/ZEB1/FREM2/ZIC1/HESX1/BMPER/SHH/FZD6/CTHRC1/GJB2/DCHS1/GBX2/SLC26A5/CYTL1/KCNK3/CH…	88	0.455959
GO:0003231	BP	GO:0003231	cardiac ventricle development	61/6492	126/18903	0.000750193	0.010174	0.00766666	PKP2/PRDM1/COL11A1/TGFBR3/MEF2C/LRP2/SMARCD3/KCNK2/GRHL2/FKBP1A/TBX5/SALL4/SMAD7/FOXF1/SALL1/PPP1R13L/HOXA13/GATA3/BMPR1A/CPE/PTK7/HAND1/HES1/TNNC1/PROX1/TNNT2/SOX4/PAX8/TNNI3/HEY2/MDM2/STRA6/TPM1/MYOCD/GREB1L/SMAD4/SLIT2/SFRP2/EDNRA/POU4F1/TNNI1/MYL3/FOXH1/TGFBR2/HAND2/CITED2/TBX20/HEY1/NOS3/MESP1/ZFPM2/CHD7/HEG1/SOX11/ZFPM1/FZD2/NKX2-5/SLIT3/PDE2A/RYR2/BMPR2	61	0.484127
GO:0098659	BP	GO:0098659	inorganic cation import across plasma membrane	61/6492	126/18903	0.000750193	0.010174	0.00766666	CALCR/ABCC8/FYN/ATP1A2/KCNH2/ATP2B4/WNK1/SLC9A7/ABCC9/ATP12A/HCN2/SLC5A1/SLC8A3/CACNA1F/SLC39A14/ATP1A3/ATP4A/PPP3CB/P2RX1/IFNG/SLC12A7/KCNJ13/SLC8A2/PPP3CC/KCNJ8/RAMP3/SLC12A5/WNK4/TRPV5/ATP1B2/TRPM4/SLC9A5/ISCU/HCN4/SLC39A8/SLC39A5/SLC24A4/CACNA1A/TRPM2/CNGA3/SLC39A4/CACNA1B/CACNA1C/CACNA2D1/SLC24A2/KCNJ6/KCNJ15/KCNJ3/TRPV6/SCNN1G/KCNJ4/KCNK9/SLC9C1/KCNJ10/SLC9A9/KCNJ14/SLC8A1/KCNJ11/SLC39A10/C…	61	0.484127
GO:0099587	BP	GO:0099587	inorganic ion import across plasma membrane	61/6492	126/18903	0.000750193	0.010174	0.00766666	CALCR/ABCC8/FYN/ATP1A2/KCNH2/ATP2B4/WNK1/SLC9A7/ABCC9/ATP12A/HCN2/SLC5A1/SLC8A3/CACNA1F/SLC39A14/ATP1A3/ATP4A/PPP3CB/P2RX1/IFNG/SLC12A7/KCNJ13/SLC8A2/PPP3CC/KCNJ8/RAMP3/SLC12A5/WNK4/TRPV5/ATP1B2/TRPM4/SLC9A5/ISCU/HCN4/SLC39A8/SLC39A5/SLC24A4/CACNA1A/TRPM2/CNGA3/SLC39A4/CACNA1B/CACNA1C/CACNA2D1/SLC24A2/KCNJ6/KCNJ15/KCNJ3/TRPV6/SCNN1G/KCNJ4/KCNK9/SLC9C1/KCNJ10/SLC9A9/KCNJ14/SLC8A1/KCNJ11/SLC39A10/C…	61	0.484127
GO:0051321	BP	GO:0051321	meiotic cell cycle	124/6492	285/18903	0.000758497	0.0102651	0.0077353	NCAPD2/NSUN2/RAD51/NDC1/FOXJ2/ASPM/RPS6KA2/TRIP13/MOV10L1/RBM7/FKBP6/SMC1B/ZCWPW1/NDC80/ATRX/RAD54L/AURKA/CDC25B/AURKC/CCNE1/LFNG/RAD51AP1/FBXO5/TTK/SMC4/CDC20/NEK2/DUSP1/MASTL/NCAPH/MND1/KIF18A/CDK2/CKS2/KLHDC3/EREG/PIWIL1/STK35/HSPA2/PRDM7/PKMYT1/LIF/TUBG1/PSMC3IP/TOP2A/FIGNL1/CCNA1/SPIRE1/ESPL1/BRIP1/SMC2/SLC2A8/DMRT1/MNS1/BRCA2/SPATA22/ANAPC11/P3H4/NUF2/HORMAD1/FANCD2/STRA8/ATM/INCENP/NCAPD3/…	124	0.435088
GO:2000177	BP	GO:2000177	regulation of neural precursor cell proliferation	46/6492	90/18903	0.000761827	0.0102886	0.00775304	KDM1A/CX3CL1/CDON/ASPM/LIMS2/WDR62/DCT/LRP2/SMARCD3/LHX5/LHX2/PITX3/MDK/GLI1/NR2E1/ID2/PTBP2/PROX1/FOXO3/NES/EMX1/SIX3/FGF2/DMRTA2/SLC16A2/VAX1/ITGB1/FOXO1/BTG2/SHH/SPINT1/ILK/SPINT2/CX3CR1/SHCBP1/OTP/ID4/GNG5/FOXG1/CEND1/FZD9/LRRK2/GJC2/TRIM71/LYN/LHX1	46	0.511111
GO:0032835	BP	GO:0032835	glomerulus development	37/6492	69/18903	0.00076564	0.0102971	0.00775945	WWTR1/NOTCH3/PAX2/COL4A4/MEF2C/PDGFB/ACTA2/HES1/NID1/TCF21/TEK/EGR1/FOXJ1/NOTCH2/PDGFRA/EDNRB/SULF1/IQGAP1/OSR1/KIRREL3/EDNRA/ANGPT1/IL6R/KLF15/SERPINB7/MTSS1/PDGFD/BCL2/LAMB2/CD34/WT1/MAGI2/AQP1/ITGB3/PECAM1/CD24/LHX1	37	0.536232
GO:0150116	BP	GO:0150116	regulation of cell-substrate junction organization	37/6492	69/18903	0.00076564	0.0102971	0.00775945	MYOC/VCL/EPHA3/GPM6B/ARHGAP6/SLK/ROCK1/FERMT2/CLASP1/CAMSAP3/COL16A1/ABL1/SFRP1/DUSP3/CORO1C/DUSP22/HRG/LAMTOR2/TEK/MACF1/KDR/ROCK2/TLN1/THBS1/ACVRL1/PHLDB2/PIK3R1/MMP14/DLC1/GREM1/MAPRE2/FAM107A/PTEN/PEAK1/RCC2/APOD/SRC	37	0.536232
GO:0006094	BP	GO:0006094	gluconeogenesis	43/6492	83/18903	0.000778534	0.0104488	0.00787375	SLC25A13/PDK2/CRY1/DGAT2/SIRT6/C1QTNF3/SIRT1/SLC25A1/PCK2/PGK1/SLC39A14/KAT2A/PPARGC1A/TPI1/NR3C1/KAT2B/SLC25A12/LEPR/ACADM/NLN/PER2/SLC37A4/G6PC3/SIK1/OGT/SOGA1/FOXO1/RANBP2/PFKFB1/CRTC2/ATF3/SERPINA12/GPT/ZNF692/MST1/PC/CLK2/SLC25A10/PGP/PPARA/SIRT7/WDR5/INS	43	0.518072
GO:0045685	BP	GO:0045685	regulation of glial cell differentiation	40/6492	76/18903	0.000781267	0.0104638	0.00788503	TP73/TREM2/MAG/ASPA/MDK/NR2E1/HES1/ID2/DLX2/EPHA4/CXCR4/EGR2/NKX2-2/BMP2/LIF/RNF112/LDLR/LIN28A/IL6ST/IL6/BIN1/IL33/TLR2/ZNF365/NTRK3/DLX1/DAAM2/TTBK1/TENM4/IL34/SLC45A3/NKX6-1/SHH/SPINT1/CDK1/ID4/F2/CNTN2/HES5/ZNF488	40	0.526316
GO:0007265	BP	GO:0007265	Ras protein signal transduction	150/6492	353/18903	0.000804406	0.0107108	0.00807115	ITGA3/IGF1/RALBP1/MYOC/CUL3/RTN4R/ARHGAP6/KITLG/RASGRF1/PSD/NCKAP1/RFXANK/NTN1/ROCK1/RASGRP2/FGF10/P2RY10/RAPGEF3/OPHN1/RAB21/RAPGEF4/ABL1/SYDE2/SH3BP1/GRAP2/SOS2/ARHGAP5/ARFGAP1/PPP2CB/ARHGEF10/SYDE1/RASA4/MET/LIMK1/KANK1/SHOC2/GIT1/LRRC59/APOC3/KCTD10/FOXM1/WASF1/BCL6/RTKN/DHCR24/RAP1A/MFN2/STMN1/APOA1/KIF14/TRIM67/CTNNAL1/ADRA1A/GPSM2/CDK2/RAB9B/CDKN1A/RRAS/RHOJ/STARD8/EPO/TRIM28/DNMT1/STARD13…	150	0.424929
GO:0032873	BP	GO:0032873	negative regulation of stress-activated MAPK cascade	29/6492	51/18903	0.000804675	0.0107108	0.00807115	PAFAH1B1/ZMYND11/CYLD/EZR/TREM2/SFRP1/AMBP/DUSP3/HIPK3/FOXM1/DUSP1/MAPK8IP1/PRMT1/GPS2/MEN1/MYC/MARVELD3/NCOR1/SFRP2/PDCD4/FOXO1/PINK1/DUSP19/DACT1/PBK/PER1/AIDA/PPIA/ZNF675	29	0.568627
GO:0070303	BP	GO:0070303	negative regulation of stress-activated protein kinase signaling cascade	29/6492	51/18903	0.000804675	0.0107108	0.00807115	PAFAH1B1/ZMYND11/CYLD/EZR/TREM2/SFRP1/AMBP/DUSP3/HIPK3/FOXM1/DUSP1/MAPK8IP1/PRMT1/GPS2/MEN1/MYC/MARVELD3/NCOR1/SFRP2/PDCD4/FOXO1/PINK1/DUSP19/DACT1/PBK/PER1/AIDA/PPIA/ZNF675	29	0.568627
GO:0046883	BP	GO:0046883	regulation of hormone secretion	104/6492	234/18903	0.000809827	0.0107439	0.00809613	ABCC8/NOS2/TFAP2B/CRY1/SYT7/GAL/SREBF1/TACR2/SIRT6/AACS/C1QTNF3/SLC8B1/JAK2/LRP5L/PICK1/PCK2/HNF4A/CDK16/SFRP1/STX1A/GHRHR/TFR2/PPP3CB/TCIRG1/IFNG/SNX4/TACR1/PASK/KLF7/VAMP8/SPP1/TNFSF11/CRY2/INHBA/INHA/SOX4/PAX8/FOXA2/LIF/KCNA5/TRPM4/ANO1/NR0B2/PER2/GRP/MTNR1B/CLOCK/ANXA1/GLUL/IL6/BLK/UQCC2/PDX1/ADCYAP1/SMAD4/TRPM2/ABCA12/AGTR1/EPHA5/CRHBP/HTR2C/CRH/SIDT2/ADRA2A/FOXO1/PFKM/KCNB1/GIP/INHBB/ADORA1…	104	0.444444
GO:0010927	BP	GO:0010927	cellular component assembly involved in morphogenesis	58/6492	119/18903	0.000810487	0.0107439	0.00809613	PAFAH1B1/CNTN1/PHLDB1/MYOM2/MEF2A/CLASP1/ACTN2/EPB41L3/RFX2/SIX4/MYL9/ERCC2/TNNT1/MAG/CNTNAP1/PRKAR1A/MYH3/PMP22/ACRBP/SRF/PROX1/TNNT2/LDB3/FLNC/CCDC136/TMOD2/ITGB4/MYH11/FHOD3/PDGFRA/TMOD1/TLR2/MYPN/TPM1/SMAD4/ACTA1/PHLDB2/ANK2/ANKRD1/TENM4/ITGB1/PGM5/CSRP1/ACTC1/ANKRD23/LMOD3/LMOD1/IHH/CFL2/AKAP13/TPPP/MYOZ2/TCAP/UGT8/CSRP2/NKX2-5/NEB/KLHL41	58	0.487395
GO:0002027	BP	GO:0002027	regulation of heart rate	53/6492	107/18903	0.000830267	0.0109836	0.00827676	DSG2/KCNH2/PKP2/SREBF1/HCN2/SNTA1/SCN1B/CAV1/BVES/PDE4D/TNNI3K/CASQ2/ADRA1A/POPDC2/ADM2/KCNA5/HRC/TRPM4/SPX/DSC2/HEY2/MDM2/EDNRB/BIN1/HCN4/TPM1/HCN3/CAMK2D/ANK2/SCN2B/CACNA1C/EDNRA/KCNE4/GPD1L/CACNA2D1/SPTBN4/KCNJ3/CACNB2/AVPR1A/SCN3B/SHOX2/TACR3/KCND3/ADRA1D/KCNH6/SCN4B/SLC8A1/CTNNA3/ADA/PLN/RYR2/CALM1/DMD	53	0.495327
GO:0055007	BP	GO:0055007	cardiac muscle cell differentiation	60/6492	124/18903	0.000838904	0.0110705	0.00834218	IGF1/MEF2A/RARB/SIRT6/ACTN2/MEF2C/TBX5/ASB2/BMPR1A/DKK1/KAT2A/IFT20/SOX6/BVES/SRF/TBX18/FOXP1/RGS2/ACADM/PROX1/ADRA1A/BMP2/PARP2/RARA/KDM6B/MYH11/MYO18B/FHOD3/PDGFRA/HEY2/ALPK3/MYOCD/GATA6/SMAD4/SIK1/ITGB1/AKAP6/SORBS2/CXADR/FZD7/ACTC1/G6PD/LMNA/SGCB/PDLIM5/PI16/MESP1/GREM1/SHOX2/CDK1/SGCD/AKAP13/TCAP/CALR/SLC8A1/NKX2-5/NEB/WT1/PPARA/ALPK2	60	0.483871
GO:0097191	BP	GO:0097191	extrinsic apoptotic signaling pathway	100/6492	224/18903	0.000840253	0.0110705	0.00834218	CX3CL1/BRCA1/ZMYND11/BID/IGF1/HGF/GCLM/BAK1/KITLG/TRAF1/ERBB3/FGF10/FGFR1/CYLD/BAX/P2RX7/JAK2/TIMP3/HMOX1/SRPX/GATA1/TRADD/PYCARD/EYA1/SFRP1/CAV1/CASP2/UNC5B/IL2/KRT18/LTBR/IFNG/BMP5/EYA4/IL1A/TNFAIP3/FOXO3/INHBA/CD70/RBCK1/BCL2L12/IFI6/TRAF2/BCL2L2/PARP2/SORT1/NGF/FAIM2/DAB2IP/IL33/YAP1/THBS1/BMPR1B/COL2A1/PML/BCL10/MCL1/SFRP2/PIK3R1/ITPRIP/BAG3/BCL2L11/DEDD/IL6R/LMNA/ATF3/HIPK1/HMGB2/TLR3/TERT/…	100	0.446429
GO:0060538	BP	GO:0060538	skeletal muscle organ development	81/6492	176/18903	0.000845317	0.0111088	0.00837106	SOX8/ELN/CDON/HMG20B/PITX1/MEF2C/COL19A1/MYL6/TLL2/SIX4/ASB2/MYLK2/CAV1/MEOX2/PPP3CB/NEURL1/CNTNAP1/HLF/RBM24/BVES/MEF2D/TCF21/EGR1/POPDC2/EGR2/NLN/NR4A1/GPCPD1/SIX1/MYOD1/POPDC3/ITGA7/CHRND/UQCC2/STRA6/CHRNA1/METTL21C/MYOCD/DMRTA2/RXRG/ACTA1/GTF3C5/ANKRD1/VAX1/DISP1/EPHB1/KLHL40/SKI/RCAN1/BTG2/LEMD2/IGSF8/ATF3/LMOD3/CITED2/SHH/CDK5/CFL2/IGF2/ANKRD33/SHOX2/FOS/BCL2/MYOZ2/AKIRIN1/DES/SOX11/ZBTB18/…	81	0.460227
GO:0050900	BP	GO:0050900	leukocyte migration	167/6492	398/18903	0.000846596	0.0111088	0.00837106	ITGA3/CX3CL1/PAFAH1B1/SELE/FYN/DAPK2/KITLG/WNK1/ROCK1/ADD2/CXCL2/MMP2/SLC8B1/CD200/TREM2/ABL1/MADCAM1/HMOX1/PDGFB/CTSG/ASB2/BDKRB1/MMP9/CD99L2/PYCARD/C5/GATA3/CXCL12/CCL7/CCL2/PF4V1/MDK/CD81/IL23A/NEDD9/IL17A/BMP5/CCR6/PODXL2/IL1A/CCL20/ZAP70/TACR1/SLAMF1/PADI2/ARTN/PGF/NKX2-3/DUSP1/TNFSF11/CXCR4/NCKAP1L/TNFAIP6/TREM1/CXCL6/NUP85/SBDS/MTUS1/FOXJ1/LBP/TRPM4/MPP1/SWAP70/LYVE1/VAV3/ANXA1/P2RX4/ITGA7…	167	0.419598
GO:0001505	BP	GO:0001505	regulation of neurotransmitter levels	98/6492	219/18903	0.000854655	0.0111918	0.00843364	SLC6A13/SYT7/ATP1A2/APBA2/GPM6B/MAOB/PFN2/CAMK2A/TACR2/STXBP2/SLC1A3/RIMS1/MEF2C/P2RX7/COMT/HRH3/SNPH/HTR2A/SLC6A2/LIN7B/SLC1A6/GRIK5/STX1A/APBA1/GIT1/P2RX1/NRXN2/SLC6A12/SLC38A1/STX2/BCHE/CSPG5/OTOF/RAB3GAP1/RAP1A/KMO/RIMS3/ADRA1A/GIPC1/NR4A1/GRM4/SYNGR3/GAD1/SYT5/UNC13A/SLC6A11/PER2/SYT11/SLC38A2/HTR1B/STX11/STXBP1/UNC13C/GCHFR/PREPL/ALDH9A1/SNCA/CPLX2/SLC22A3/CASK/CHRNA6/DOC2A/ITGB1/ADRA2A/GAB…	98	0.447489
GO:0044773	BP	GO:0044773	mitotic DNA damage checkpoint signaling	42/6492	81/18903	0.0008713	0.0113868	0.00858053	BRCA1/FOXN3/TIPIN/GTSE1/CDC14B/CLSPN/MSH2/FBXO31/CASP2/CDK5RAP3/CCND1/CCNG1/CDK2/CDKN1A/STK33/MDM2/PML/TICRR/DTL/FANCD2/ATM/CHEK1/EME1/DONSON/TOPBP1/PRAP1/PLK1/PBK/RFWD3/CRADD/CDK1/TRIAP1/RAD9A/PLK3/PIDD1/CHEK2/FOXO4/MUC1/BLM/EME2/GIGYF2/PRKDC	42	0.518519
GO:2000573	BP	GO:2000573	positive regulation of DNA biosynthetic process	39/6492	74/18903	0.000873345	0.0113905	0.00858332	HGF/PNKP/RFC2/GRHL2/PDGFB/GINS1/RGCC/RFC5/SMOC2/NEK2/CHTF18/DKC1/GINS2/PCNA/RFC3/PKIB/KLF4/DSCC1/MYC/CYP1B1/FGF2/WRAP53/NAF1/CCT6A/GINS4/ATM/CCT5/NEK7/CCT8/CCT3/RFC4/CCT2/GREM1/PARM1/AURKB/MAPK15/GINS3/SRC/POLG2	39	0.527027
GO:0002274	BP	GO:0002274	myeloid leukocyte activation	105/6492	237/18903	0.000876586	0.0114097	0.00859784	KMT2E/CX3CL1/SLC11A1/GAB2/SPHK2/TSPAN32/IFI35/RORA/STXBP2/CST7/CD200/UNC13D/TREM2/JAK2/HMOX1/CTSG/BPI/GATA1/FOXF1/PYCARD/PTGDS/CTSC/LTBR/IFNG/PTPN6/HAVCR1/SNX4/FOXP1/ITGB6/IL1RL1/PLA2G4A/SLAMF1/MMP8/VAMP8/NR4A3/CLU/NMI/CXCL6/MT1G/CD93/WNK4/TICAM1/LBP/LDLR/JUND/SYT11/NOTCH2/GRP/ANXA1/DYSF/IL6/BLK/STXBP1/TLR4/IL33/IRF4/TLR2/THBS1/ADAM10/CRTC3/SNCA/TSLP/CPLX2/TTBK1/MFHAS1/ATM/CD226/FER/ENPP3/KIT/IFN…	105	0.443038
GO:0030177	BP	GO:0030177	positive regulation of Wnt signaling pathway	68/6492	144/18903	0.00091536	0.0118345	0.00891794	ZRANB1/DEPDC1B/WNK1/CDH3/ASPM/FGF10/NLE1/ABL1/GID8/RSPO4/TBL1X/FGF9/SALL1/SFRP1/PLEKHA4/DLX5/CAV1/KANK1/DKK1/WNT3/NFKB1/PTK7/USP34/WLS/TMEM9/TNFAIP3/RECK/SOX4/BMP2/MACF1/SMARCA4/TRPM4/ZBED3/LGR6/CSNK1G2/ANKRD6/TLR2/SULF1/YAP1/FGF2/LGR5/NKD1/PRDM15/SFRP2/DAAM2/RSPO3/RSPO2/DIXDC1/DKK2/SKI/EDA/PBXIP1/TERT/SHH/DACT1/ILK/RSPO1/ZEB2/USP47/RUVBL1/TBL1XR1/LBX2/FZD9/LRRK2/SRC/PPM1N/DDX3X/JRK	68	0.472222
GO:0090218	BP	GO:0090218	positive regulation of lipid kinase activity	22/6492	36/18903	0.000918034	0.0118345	0.00891794	EPHA8/PDGFB/EEF1A2/CD81/TEK/FLT3/VAV3/PDGFRA/AGAP2/FGF2/DGKZ/KIT/VAV2/IRS1/P2RY12/CCL19/CD19/F2/TNFAIP8L3/PRKD1/SRC/LYN	22	0.611111
GO:0051231	BP	GO:0051231	spindle elongation	11/6492	14/18903	0.000918369	0.0118345	0.00891794	BIRC5/KIF4A/AURKC/CDCA8/KIF23/KIF11/INCENP/RACGAP1/AURKB/PRC1/KIF4B	11	0.785714
GO:0051255	BP	GO:0051255	spindle midzone assembly	11/6492	14/18903	0.000918369	0.0118345	0.00891794	BIRC5/KIF4A/AURKC/CDCA8/KIF23/INCENP/RACGAP1/AURKB/CCDC69/PRC1/KIF4B	11	0.785714
GO:1902969	BP	GO:1902969	mitotic DNA replication	11/6492	14/18903	0.000918369	0.0118345	0.00891794	RAD51/MCM2/MCM6/CDC45/GINS1/MCM4/LIG1/MCM3/BCL6/BRCA2/GINS3	11	0.785714
GO:0035725	BP	GO:0035725	sodium ion transmembrane transport	84/6492	184/18903	0.000930286	0.0119643	0.00901571	HECW1/SLC6A13/SLC6A7/ATP1A2/ATP2B4/WNK1/SLC9A7/ATP12A/SLC4A11/SLC8B1/HCN2/SLC5A1/CACNA1I/SLC8A3/SNTA1/NALCN/SLC6A2/SLC17A7/ATP1A3/SLC5A5/ATP4A/SCN1B/PKD2L1/SLC6A12/SLC4A9/SLC8A2/PKD2/WNK4/ATP1B2/FGF13/TRPM4/SLC6A8/SLC6A6/SLC6A11/GRP/SLC9A5/SCN7A/FXYD6/HCN4/SLC24A4/TRPM2/HCN3/OSR1/CAMK2D/SHROOM2/STOM/SCN2B/FXYD4/GPD1L/UTRN/CNKSR3/SLC24A2/SLC34A2/FGF11/SLMAP/SLC6A20/SLC9B2/SCN3B/NETO1/SCNN1G/SLC3A2…	84	0.456522
GO:0048592	BP	GO:0048592	eye morphogenesis	74/6492	159/18903	0.000938945	0.0120517	0.00908157	WNT16/SOX8/TFAP2B/BAK1/PRDM1/CDON/PAX2/RARB/BAX/DZANK1/RPGRIP1/VSX1/RS1/RP1/CALB1/WNT2/PITX3/EFEMP1/VAX2/MFN2/MFAP2/PROX1/TBX2/SOX9/GNGT1/KDR/EPHB2/WNT2B/NOTCH2/CRB1/TFAP2A/MYO7A/STRA6/SIX3/ABI2/FGF2/FBN2/FOXN4/NKD1/EPHA2/WNT9A/MEIS1/SHROOM2/CRB2/ZEB1/ROM1/EPHB1/MEGF11/SKI/FZD5/HIPK1/IHH/PITX2/CITED2/FAT3/FBN1/STAT3/BCL2/COL8A2/CABP4/SOX11/ZHX2/FJX1/TH/FOXL2/ALDH1A3/FSCN2/FOXE3/DIO3/MFAP5/RORB/HM…	74	0.465409
GO:0030856	BP	GO:0030856	regulation of epithelial cell differentiation	76/6492	164/18903	0.000941478	0.0120602	0.00908803	NME2/WWTR1/VCL/FOXJ2/ROCK1/FGF10/TP63/PAX2/TP73/GRHL2/ADD1/MMP9/ESRP1/CAV1/EZH2/GATA3/CCND1/CYP27B1/IFNG/HES1/IL1A/STAT1/PROC/ERRFI1/MYCL/PTCH2/KLF7/SOX9/PAX8/NKX2-2/BMP2/ZFP36/LIF/FOXJ1/BTG1/ROCK2/HEY2/SPRY2/VEZF1/YAP1/FGF2/ACVRL1/OSR1/ABCA12/ZEB1/XDH/F11R/NKX6-1/SPRY1/NKX6-3/AQP3/SPRED1/TMEM100/MESP1/GDNF/IL13/STAT5B/KDF1/ETV4/ZBED2/APOLD1/CDH5/PLCB1/CLDN5/MAFF/ZFP36L1/PTCH1/FOXE3/SPRED3/AJAP1/…	76	0.463415
GO:1905330	BP	GO:1905330	regulation of morphogenesis of an epithelium	35/6492	65/18903	0.000952576	0.012142	0.00914962	SOX8/HGF/FGF10/PAX2/SIRT6/ESR1/ABL1/SIX4/SFRP1/WNT2/GATA3/MDK/FOXP1/TBX2/SOX9/PAX8/SIX1/LIF/WNT2B/SULF1/FGF2/FGF7/NKD1/ADAMTS12/RNF207/SHH/GREM1/GDNF/AR/CXCL10/MAGED1/LBX2/FKBPL/HOXB7/LHX1	35	0.538462
GO:0043588	BP	GO:0043588	skin development	130/6492	302/18903	0.000954857	0.012142	0.00914962	WNT16/ITGA3/TFAP2B/PKD1/NME2/NSUN2/OPN3/CDH3/DLX3/ROCK1/GAL/FGF10/TP63/GLI2/FOSL2/COL5A3/GRHL2/TGM1/TRPC4AP/FERMT1/TRADD/FA2H/ERCC2/CASP14/CNFN/COMP/LSR/MET/EZH2/LHX2/DKK1/CYP27B1/SRF/ARRDC3/IL1A/ITGB6/IGFBP5/DHCR24/ERRFI1/ASH1L/PTCH2/STMN1/PPL/GORAB/CSTA/INHBA/HOXC13/SNAI1/EREG/SOX9/AHDC1/ZFP36/PALLD/ITGB4/SPINK5/ROCK2/LRP4/ANXA1/KRT85/KRT7/KLF4/YAP1/FRAS1/LGR5/KRT71/FGF7/GATA6/SMAD4/EPHA2/S100A…	130	0.430464
GO:0019319	BP	GO:0019319	hexose biosynthetic process	44/6492	86/18903	0.000955366	0.012142	0.00914962	SLC25A13/PDK2/CRY1/DGAT2/SIRT6/C1QTNF3/AKR1B1/SIRT1/SLC25A1/PCK2/PGK1/SLC39A14/KAT2A/PPARGC1A/TPI1/NR3C1/KAT2B/SLC25A12/LEPR/ACADM/NLN/PER2/SLC37A4/G6PC3/SIK1/OGT/SOGA1/FOXO1/RANBP2/PFKFB1/CRTC2/ATF3/SERPINA12/GPT/ZNF692/MST1/PC/CLK2/SLC25A10/PGP/PPARA/SIRT7/WDR5/INS	44	0.511628
GO:0019935	BP	GO:0019935	cyclic-nucleotide-mediated signaling	44/6492	86/18903	0.000955366	0.012142	0.00914962	GUCA2B/GUCA1A/GAL/ADCY2/ADCYAP1R1/RAPGEF3/SCTR/CDC34/RASD2/GHRHR/RUNDC3A/GLP1R/CAP2/PDE4D/PEX5L/SOX9/OPRL1/GNAI1/GUCY2D/MTNR1B/HTR2B/EDNRB/THBS1/ADCYAP1/EPHA5/HTR2C/AKAP6/PDE3B/GPR61/GIP/NPR2/UCN/NPR1/PDE7B/PDZD3/PDE3A/GPR3/PRKG1/FFAR4/PDE2A/LPAR1/PDE7A/AQP1/INS	44	0.511628
GO:0016051	BP	GO:0016051	carbohydrate biosynthetic process	95/6492	212/18903	0.000961053	0.0121903	0.00918604	SLC25A13/PDK2/CRY1/IGF1/DGAT2/SIRT6/ADCYAP1R1/C1QTNF3/AKR1B1/SORBS1/SIRT1/SLC25A1/PDGFB/PCK2/PGK1/HAS3/SLC39A14/HAS1/ISYNA1/KAT2A/NFKB1/PPARGC1A/TPI1/GYS2/B3GAT2/NR3C1/KAT2B/PASK/SLC25A12/LEPR/ACADM/ST6GALNAC5/AKR1A1/NLN/CHST8/ST3GAL3/DYRK2/MAS1/RGN/PER2/SLC37A4/LHCGR/G6PC3/IMPA2/SIK1/PGD/SNCA/OGT/CSGALNACT1/ST8SIA6/SOGA1/FOXO1/RANBP2/PHKG2/B4GALT5/PFKFB1/G6PD/ST6GALNAC6/CRTC2/PTH1R/B3GALT2/AGL/A…	95	0.448113
GO:0086001	BP	GO:0086001	cardiac muscle cell action potential	41/6492	79/18903	0.000975227	0.0123459	0.00930328	ATP1A2/DSG2/KCNH2/PKP2/KCNN2/HCN2/SNTA1/SCN1B/CAV1/TBX18/NUP155/KCNJ8/FGF13/KCNA5/TRPM4/DSC2/BIN1/HCN4/HCN3/CAMK2D/ANK2/SCN2B/CACNA1C/KCNE4/GPD1L/CACNA2D1/CXADR/RNF207/KCNJ3/SLMAP/CACNB2/SCN3B/KCND3/SCN4B/GJC1/SLC8A1/CTNNA3/FLNA/RYR2/CALM1/DMD	41	0.518987
GO:0099084	BP	GO:0099084	postsynaptic specialization organization	21/6492	34/18903	0.000983009	0.0123847	0.00933255	OPHN1/CBLN1/CNTNAP1/NRXN2/SLITRK3/LRRC4/ARHGEF9/LRRC4B/NTRK3/TMEM108/LRRTM2/PTPRD/ZDHHC12/NLGN1/NPTX1/PTEN/LRFN4/NRXN1/RELN/IL1RAP/SYNGAP1	21	0.617647
GO:0060070	BP	GO:0060070	canonical Wnt signaling pathway	133/6492	310/18903	0.000984274	0.0123847	0.00933255	WNT16/HECW1/MKS1/WWTR1/DKK3/WNK1/PTPRU/CDH3/ASPM/LRP6/FGF10/NLE1/WNT8B/JADE1/CYLD/GID8/FERMT1/TBL1X/FGF9/SFRP1/TLE6/PLEKHA4/DLX5/CAV1/WNT2/TLE4/KANK1/GATA3/DKK1/WNT3/IFT20/NFKB1/FOLR1/MDK/GLI1/PTK7/TBX18/CSNK1A1/IGFBP2/USP34/WNT6/MAD2L2/WLS/TMEM9/FOXO3/SFRP5/TNN/EGR1/RECK/SOX4/SOX9/BMP2/TRPM4/NPHP4/ZBED3/LGR6/CSNK1G2/WNT2B/LRP4/UBAC2/APC/ANKRD6/EDNRB/KLF4/DAB2IP/YAP1/FGF2/PRICKLE1/LGR5/NKD1/PRDM1…	133	0.429032
GO:0021510	BP	GO:0021510	spinal cord development	49/6492	98/18903	0.000984679	0.0123847	0.00933255	PKD1/DMRT3/GLI2/LHX5/CHRD/ERCC2/LHX3/SOX6/PTBP2/PROX1/PKD2/HOXB8/LHX4/SOX4/NKX2-2/MPST/MNX1/ACTL6A/LBX1/FOXN4/SRD5A1/ABT1/DAAM2/VLDLR/BAG3/ZIC1/LRP8/ISL2/DRAXIN/TBX20/SHH/GBX1/PBX3/GDNF/FOXB1/SOX11/SOX12/HOXC10/CLN8/PTCH1/DYNC2H1/DCC/RELN/ADARB1/GIGYF2/DCTN1/VIT/LHX1/NEFL	49	0.5
GO:0009132	BP	GO:0009132	nucleoside diphosphate metabolic process	63/6492	132/18903	0.0009878	0.0123847	0.00933255	NME2/IGF1/ENTPD2/PKM/HDAC4/ENO1/SIRT6/MAGI3/CAD/P2RX7/PGK1/HTR2A/NME4/GAPDHS/OGDH/PRKAG2/GIT1/GALK1/IFNG/GAPDH/TPI1/NME5/UMPS/CBFA2T3/MPP1/CMPK2/ALDOB/ENTPD1/NUDT7/NCOR1/RPTOR/FOXK2/PKLR/CASK/OGT/DLG2/PFKM/LRGUK/HKDC1/HK1/PFKFB1/ADPGK/HK2/SLC2A6/HK3/PRKAA2/AK4/NUDT5/DDIT4/DTYMK/STAT3/RRM2/NME6/BPGM/DHTKD1/NME9/PPARA/ENTPD8/ENTPD6/NME1/EIF6/ACTN3/INS	63	0.477273
GO:0002790	BP	GO:0002790	peptide secretion	102/6492	230/18903	0.000987868	0.0123847	0.00933255	ABCC8/NOS2/TFAP2B/SYT7/PTPRN/GAL/SREBF1/TACR2/SIRT6/AACS/SLC8B1/RAPGEF4/JAK2/LRP5L/PICK1/PCK2/HNF4A/CDK16/SFRP1/STX1A/GHRHR/TFR2/RAB11FIP2/PPP3CB/CPE/TCIRG1/IFNG/SLC16A10/ACVR2B/PASK/KLF7/SNX19/TNFSF11/SOX4/PAX8/FOXA2/VGF/KCNA5/TRPM4/ANO1/NR0B2/PER2/GRP/MTNR1B/CLOCK/ANXA1/GLUL/IL6/BLK/IL1RN/UQCC2/PDX1/ADCYAP1/TRPM2/S100A8/ABCA12/EPHA5/CRHBP/VIP/SLC16A2/HTR2C/CRH/CAMK2G/SIDT2/ADRA2A/FOXO1/PFKM/PTP…	102	0.443478
GO:0098739	BP	GO:0098739	import across plasma membrane	91/6492	202/18903	0.000989801	0.012385	0.00933272	CALCR/ABCC8/SLC6A13/FYN/ATP1A2/KCNH2/ATP2B4/SLC2A3/WNK1/SLC9A7/ABCC9/ATP12A/SLC46A1/SLC1A3/LRP2/SLC15A1/HCN2/SLC5A1/SLC8A3/CACNA1F/SLC39A14/SLC1A6/ATP1A3/ATP4A/PPP3CB/P2RX1/FOLR1/SLC38A1/IFNG/SLC12A7/KCNJ13/SLC1A4/RGS2/SLC8A2/PPP3CC/KCNJ8/RAMP3/SLC12A5/WNK4/TRPV5/ATP1B2/TRPM4/SLC6A6/PER2/SLC38A2/SLC9A5/ISCU/THBS1/SLC5A6/HCN4/SLC39A8/SLC39A5/SLC24A4/CACNA1A/TRPM2/CNGA3/SLC16A2/SLC39A4/CACNA1B/SLC4…	91	0.450495
GO:0021545	BP	GO:0021545	cranial nerve development	31/6492	56/18903	0.000996506	0.0124448	0.00937781	SEMA3F/ERBB3/CNGB1/PAX2/SLC1A3/SIX4/SALL1/TCIRG1/HES1/PLXNA1/NRP2/HOXB3/EGR2/NKX2-2/SIX1/PLXNA3/EPHB2/TFAP2A/SLC24A4/ACKR3/POU4F1/EPHB1/CHRNB2/CITED2/CHD7/KCNA2/ATOH7/TBX1/ADARB1/LPAR1/PLXNA4	31	0.553571
GO:0061041	BP	GO:0061041	regulation of wound healing	65/6492	137/18903	0.00100647	0.012545	0.00945334	ENPP4/TFPI/ABCC8/PLAUR/MYLK/FERMT2/CLASP1/FAP/CPB2/APOH/PDGFB/FERMT1/WFDC1/CAV1/KANK1/ACTA2/SMOC2/HBEGF/KNG1/HRG/PROC/NFE2L2/F3/SERPINC1/TNFAIP3/CXCR4/PLAU/FOXA2/VIL1/F12/APCS/EPHB2/PDGFRA/ANXA1/THBS1/EMILIN1/FGF2/MMRN1/PHLDB2/CASK/ITGB1/ADRA2A/UBASH3B/USF1/DDR2/CLDN1/NOS3/CLDN3/PRKCE/FGG/FGA/FGB/PTEN/CLEC7A/CD34/HRAS/ANO6/F2/F2R/PROS1/PRKG1/CLDN4/AJAP1/SERPINB2/EPPK1	65	0.474453
GO:0031099	BP	GO:0031099	regeneration	87/6492	192/18903	0.00101417	0.0126167	0.00950735	IGF1/HGF/BAK1/RTN4R/PTPRU/TGFBR3/FGF10/SCARF1/CPB2/MMP2/AURKA/JAK2/HMOX1/SRSF5/GATA1/CPQ/PTPRS/MAG/EZH2/CXCL12/SGCA/CCND1/FOLR1/APOA5/MDK/CD81/GLI1/CSPG5/EPHA4/MTR/SPP1/NR4A3/PGF/FLT3/CDKN1A/MYOD1/KLK8/RGN/MAP1B/NR0B2/PCNA/LGR6/LPIN1/ANXA1/IL6/KLF4/BAAT/KIAA0319/YAP1/PNPT1/PDX1/TARBP2/SERPINA10/CERS2/ADAM15/CCNA2/IGFBP1/WNT7A/FZD7/PFKFB1/APOA2/CLDN1/IHH/TGFBR2/NDEL1/AXL/KLK6/TM4SF4/CDK1/BCL2/PTEN…	87	0.453125
GO:0000086	BP	GO:0000086	G2/M transition of mitotic cell cycle	67/6492	142/18903	0.00102136	0.0126817	0.00955632	FBXL3/BRCA1/FHL1/FOXN3/CDC14B/ABCB1/ORC1/AURKA/CLSPN/CDC6/CDC7/CDC25B/CDK5RAP3/CCND1/FOXM1/TPD52L1/FBXO5/CCNG1/MIIP/CENPF/KIF14/MASTL/CIT/CDK2/CDKN1A/HSPA2/PKMYT1/NES/CCNB1/CDK4/FBXL8/NABP2/TICRR/DTL/CCNA2/SKP2/FBXL17/ATM/CHEK1/CDC25C/DONSON/DBF4B/TOPBP1/CDC25A/CHMP4C/MELK/ZFYVE19/WEE1/PLK1/MECP2/USP47/CDK1/PLK3/CCDC57/CTC1/AURKB/RCC2/FBXL6/PLCB1/FBXL7/CHEK2/FOXO4/PBX1/BLM/FBXL22/CALM1/LCMT1	67	0.471831
GO:0002791	BP	GO:0002791	regulation of peptide secretion	83/6492	182/18903	0.00103294	0.012801	0.00964622	ABCC8/NOS2/TFAP2B/SYT7/SREBF1/SIRT6/AACS/SLC8B1/JAK2/LRP5L/PICK1/PCK2/HNF4A/CDK16/SFRP1/STX1A/GHRHR/TFR2/PPP3CB/TCIRG1/IFNG/PASK/KLF7/TNFSF11/SOX4/PAX8/FOXA2/KCNA5/TRPM4/ANO1/NR0B2/PER2/GRP/MTNR1B/CLOCK/GLUL/IL6/BLK/UQCC2/PDX1/ADCYAP1/TRPM2/S100A8/ABCA12/EPHA5/CRHBP/HTR2C/CRH/SIDT2/ADRA2A/FOXO1/PFKM/KCNB1/GIP/INHBB/ADORA1/NKX6-1/UCN/SLC9B2/GPER1/RAB8B/STXBP4/MIDN/IRS1/MYRIP/KISS1/TRH/PRKCE/JAGN1/…	83	0.456044
GO:0044839	BP	GO:0044839	cell cycle G2/M phase transition	73/6492	157/18903	0.00104572	0.0128967	0.00971838	FBXL3/BRCA1/FHL1/FOXN3/NDC80/CDC14B/ABCB1/ORC1/AURKA/CLSPN/CDC6/CDC7/CDC25B/CDK5RAP3/CCND1/FOXM1/TPD52L1/FBXO5/CCNG1/MIIP/CENPF/KIF14/MASTL/CIT/CDK2/CDKN1A/HSPA2/PKMYT1/NES/CCNB1/CDK4/FBXL8/NABP2/TICRR/DTL/DYRK3/CCNA2/SKP2/FBXL17/ATM/CHEK1/PAXIP1/CCNB2/CDC25C/DONSON/DBF4B/TOPBP1/CDC25A/CHMP4C/MELK/ZFYVE19/WEE1/PLK1/MECP2/ATF5/USP47/CDK1/PLK3/CCDC57/ATAD5/CTC1/AURKB/RCC2/FBXL6/PLCB1/FBXL7/CHEK2/FO…	73	0.464968
GO:0003338	BP	GO:0003338	metanephros morphogenesis	20/6492	32/18903	0.00104665	0.0128967	0.00971838	SOX8/PKD1/FGF10/PAX2/SALL1/CALB1/HES1/STAT1/PKD2/SOX9/PAX8/LIF/FOXJ1/FRAS1/KIF26B/GREM1/GDNF/WT1/HES5/LHX1	20	0.625
GO:0034508	BP	GO:0034508	centromere complex assembly	20/6492	32/18903	0.00104665	0.0128967	0.00971838	SIRT6/CENPI/CENPT/OIP5/CENPA/CENPF/HELLS/CENPK/HJURP/DLGAP5/NASP/CENPO/CENPE/ITGB3BP/CENPH/MIS18A/CENPN/KNTC1/CENPP/CENPW	20	0.625
GO:0034638	BP	GO:0034638	phosphatidylcholine catabolic process	12/6492	16/18903	0.00106991	0.0131333	0.00989662	SCARB1/GDPD3/PLA2G15/PLA2G4A/PLA2G5/LDLR/APOC1/PNPLA7/ENPP2/PLA2G7/PLB1/LIPC	12	0.75
GO:2000696	BP	GO:2000696	regulation of epithelial cell differentiation involved in kidney development	12/6492	16/18903	0.00106991	0.0131333	0.00989662	WWTR1/PAX2/MMP9/GATA3/STAT1/PAX8/LIF/YAP1/OSR1/GDNF/CD24/LHX1	12	0.75
GO:0003254	BP	GO:0003254	regulation of membrane depolarization	26/6492	45/18903	0.00107253	0.0131406	0.00990211	DCN/FHL1/GCLM/MYOC/P2RX7/TBX5/PPP2R3C/HCN2/SMAD7/SCN1B/IFI6/KDR/TRPM4/HCN4/HCN3/CAMK2D/SCN2B/GPD1L/SLMAP/SCN3B/BCL2/BOK/FZD9/LRRK2/SRC/MLLT11	26	0.577778
GO:0042542	BP	GO:0042542	response to hydrogen peroxide	62/6492	130/18903	0.00110356	0.0134841	0.010161	FYN/HGF/BAK1/PAX2/MMP2/SIRT1/ABL1/HMOX1/TRPA1/PPP2CB/MET/EZH2/SETX/PPIF/AREG/CRYAB/SOD2/PDCD10/ECT2/FOXP1/STAT1/NFE2L2/TNFAIP3/FOXO3/NR4A3/CAT/KLF2/RNF112/KCNA5/KDM6B/PCNA/ANXA1/IL6/IL18BP/CYP1B1/TRPM2/RHOB/SIGMAR1/MAPK13/PPP1R15B/PINK1/DDR2/ANKZF1/FABP1/AXL/CDK1/PDGFD/BCL2/FOSL1/SPHK1/NQO1/PYCR1/SLC8A1/HBA2/LRRK2/SRC/GPX1/AQP1/HBB/HP/TXNIP/PCGF2	62	0.476923
GO:0007202	BP	GO:0007202	activation of phospholipase C activity	19/6492	30/18903	0.00110682	0.0134841	0.010161	SELE/ARHGAP6/LPAR2/ADCYAP1R1/HTR2A/ITK/ADRA1A/S1PR4/GPR55/HTR2B/EDNRA/GNAQ/AVPR1A/P2RY12/NMUR1/P2RY6/RASGRP4/LPAR1/ANG	19	0.633333
GO:0010464	BP	GO:0010464	regulation of mesenchymal cell proliferation	19/6492	30/18903	0.00110682	0.0134841	0.010161	CHRD/FGF9/FOXF1/WNT2/BMPR1A/STAT1/SOX9/SIX1/KDR/MYC/NFIB/ZEB1/LMNA/IHH/TGFBR2/SHH/SHOX2/CTNNBIP1/TBX1	19	0.633333
GO:0046942	BP	GO:0046942	carboxylic acid transport	125/6492	290/18903	0.0011124	0.0135265	0.0101929	SLC25A13/ABCB4/NOS2/SLC6A13/SLC6A7/SLC38A5/SLC11A1/ATP1A2/SLC7A9/MPC1/PTGS2/SLC46A1/SLC1A3/LRP2/SLCO1A2/P2RX7/SLC26A3/SLC25A1/SLC16A8/SLC10A1/HRH3/SLC25A14/SLC25A15/SLC38A7/SLC7A6/AQP9/SLC17A7/SLC1A6/APBA1/FOLR1/SLC6A12/SLC38A1/SLCO1B3/SLC16A10/IL1A/RAB3GAP1/SLC25A12/SLC1A4/PLA2G4A/RGS2/KMO/SLC19A2/SLC16A7/SLC25A2/TNFSF11/GIPC1/ABCC10/ABCC4/PLA2G5/SLC6A8/SLC6A6/NR0B2/SLC6A11/PER2/TRPC4/SLC38A2/SL…	125	0.431034
GO:0046849	BP	GO:0046849	bone remodeling	45/6492	89/18903	0.00115715	0.0139798	0.0105346	WNT16/PDK4/SYT7/CLDN18/TFRC/SNX10/P2RX7/EFNA2/LRP5L/RASSF2/ACP5/SFRP1/MDK/TCIRG1/LEPR/TNFAIP3/SPP1/TGFB3/TNFSF11/TPH1/NOTCH2/HTR1B/GPR55/IL6/P3H4/EPHA2/ADAM8/UBASH3B/PRKCA/PPARGC1B/PTH1R/IHH/TNFRSF11B/CTHRC1/DCSTAMP/GREM1/LTBP3/ADRB2/S1PR1/TMEM119/MITF/SRC/ZNF675/CCDC154/ITGB3	45	0.505618
GO:1904385	BP	GO:1904385	cellular response to angiotensin	18/6492	28/18903	0.0011607	0.0139798	0.0105346	CYBA/ROCK1/CAMK2A/ACTN2/CDC6/CA2/CAV1/NFKB1/NFE2L2/INHBA/MAS1/ROCK2/BRIP1/AGTR1/DDR2/AGTRAP/SLC30A10/SRC	18	0.642857
GO:0007156	BP	GO:0007156	homophilic cell adhesion via plasma membrane adhesion molecules	78/6492	170/18903	0.0011613	0.0139798	0.0105346	CELSR3/PKD1/CDH1/DSG2/CDH3/CDH19/PVR/CDHR2/CDH17/PCDHB4/PCDHA6/PCDHGA2/IGSF9/CDHR5/CEACAM5/PCDHB2/PCDHB15/CDH6/IGSF21/PCDHB8/MYOT/CDH26/CDHR3/PALLD/CDH15/VSTM2L/DSC2/DSG1/DSC1/MYPN/PCDH10/CLSTN3/AMIGO2/CDH24/CNTN4/IGSF11/KIRREL3/ITGB1/ROBO4/NPTN/CLSTN2/NEXN/CADM3/FAT3/DCHS1/CDH16/PCDH7/DSG4/CADM2/DSCAML1/PCDHB9/CDH4/CDH5/AMIGO1/CNTN2/PCDH9/PCDH18/FAT4/PLXNB2/DCHS2/PCDHA7/PCDHA5/PCDHA2/PCDHA1/PCDH…	78	0.458824
GO:0050806	BP	GO:0050806	positive regulation of synaptic transmission	78/6492	170/18903	0.0011613	0.0139798	0.0105346	CYP46A1/PRKCZ/PTGS2/TACR2/CACNG4/SLC1A3/RIMS1/ITPR3/ABL1/SLC8A3/NFATC4/NALCN/ZDHHC2/CA2/CALB1/GRIN2D/STX1A/LGI1/CCL2/MPP2/NR2E1/TACR1/RAB3GAP1/EPHA4/KMO/RIMS3/SLC8A2/ADRA1A/TSHZ3/EPHB2/GLUL/STXBP1/CLSTN3/IGSF11/SNCA/LRRTM2/SLC24A2/NPTN/CLSTN2/PINK1/GIP/ZDHHC12/SQSTM1/NCSTN/LRRTM1/ADORA1/GRIK2/GPER1/CDK5/RAPSN/CACNB2/STX3/FAM107A/CX3CR1/CA7/MECP2/ROR2/NLGN1/KISS1/KIF5B/PRKCE/PTEN/SYT12/HAP1/KCTD13…	78	0.458824
GO:0070507	BP	GO:0070507	regulation of microtubule cytoskeleton organization	72/6492	155/18903	0.00116461	0.0139798	0.0105346	FKBP4/PAFAH1B1/PKD1/TACC3/PHLDB1/EPHA3/NAV3/ROCK1/CLASP1/SPAG5/CAMSAP3/CYLD/TPX2/ABL1/RASSF7/RAE1/SPEF1/FSD1/CLIP3/MET/MPDZ/GIT1/SLAIN2/CHMP3/STMN1/KIF18A/GPSM2/STIL/GNAI1/TTBK2/FGF13/CLIP1/MAP1B/PSRC1/APC/CKAP2/BORA/ATAT1/TRIM54/KATNB1/ANKRD53/PHLDB2/SNCA/CHMP7/DIXDC1/TRIM36/CCSAP/SKA1/SASS6/PRKAA2/KIF15/CHMP4C/SKA3/PLK1/MAP1A/MAPRE2/CDK2AP2/FAM107A/MECP2/TPPP/MAP6/CDK5R1/PDE4DIP/CDH5/MAP6D1/MAP…	72	0.464516
GO:0006977	BP	GO:0006977	DNA damage response, signal transduction by p53 class mediator resulting in cell cycle arrest	13/6492	18/18903	0.00116913	0.0139798	0.0105346	GTSE1/CASP2/CDKN1A/MDM2/PML/ATM/PRAP1/CRADD/TRIAP1/PLK3/PIDD1/CHEK2/MUC1	13	0.722222
GO:0030540	BP	GO:0030540	female genitalia development	13/6492	18/18903	0.00116913	0.0139798	0.0105346	BAK1/FGF10/TP63/LRP2/BAX/ESR1/TYRO3/STRA6/SRD5A1/AXL/CHD7/LHX1/SRD5A2	13	0.722222
GO:0051900	BP	GO:0051900	regulation of mitochondrial depolarization	13/6492	18/18903	0.00116913	0.0139798	0.0105346	DCN/GCLM/MYOC/P2RX7/PPP2R3C/IFI6/KDR/BCL2/BOK/FZD9/LRRK2/SRC/MLLT11	13	0.722222
GO:0051988	BP	GO:0051988	regulation of attachment of spindle microtubules to kinetochore	13/6492	18/18903	0.00116913	0.0139798	0.0105346	SPAG5/BIRC5/KAT2B/ECT2/NEK2/KNSTRN/CCNB1/CDCA8/APC/INCENP/RACGAP1/AURKB/RCC2	13	0.722222
GO:0018212	BP	GO:0018212	peptidyl-tyrosine modification	160/6492	382/18903	0.00117523	0.0140148	0.0105609	FYN/GPRC5A/IGF1/CNTN1/HGF/MUSK/MAP2K3/EPHA3/ROS1/KITLG/TNK2/LTK/ERBB3/TIE1/PKM/PRKCZ/FGF10/EPHA8/FGFR1/EPHA6/IL12RB2/TYRO3/TREM2/JAK2/ABL1/PDGFB/RPS6KA5/BMX/GATA1/HTR2A/ARL2BP/RIPK2/SFRP1/DYRK1B/TYK2/CAV1/MET/FGF8/NEURL1/CSF3/UNC119/AREG/IL2/HIPK3/CD81/IL23A/IFNG/PTPN6/NEDD9/DUSP22/TTK/GHR/HBEGF/ITK/HRG/HES1/ZAP70/EFEMP1/EPHA4/ERRFI1/TEK/ADRA1A/CD80/FLT3/EREG/SRMS/DYRK2/KDR/LIF/EPO/VPS25/EPHB2/IL…	160	0.418848
GO:0019722	BP	GO:0019722	calcium-mediated signaling	93/6492	208/18903	0.00117664	0.0140148	0.0105609	PDK2/SELE/PTBP1/CD22/IGF1/ATP1A2/HOMER3/ATP2B4/ERBB3/LMCD1/NFATC3/P2RX7/TREM2/NFATC4/NFATC2/NCALD/DMPK/GRIN2D/PPP3CB/CCR6/CCL20/ZAP70/NR5A2/RCAN3/SLC8A2/CASQ2/TNFSF11/PPP3CC/CXCR4/PTGFR/DYRK2/KDR/ACKR4/TNNI3/HRC/TRPM4/RGN/NFATC1/CHRM3/P2RX4/HTR2B/EDNRB/NR5A1/LHCGR/SLC24A4/TRPM2/ACKR3/TRPM8/ACKR2/AGTR1/CAMK2D/ANK2/ITPR1/CACNA1C/AKAP6/CLIC2/RCAN1/CXCR1/AVPR1A/TMEM100/SAMD14/CX3CR1/P2RY12/SGCD/KSR2/…	93	0.447115
GO:0050769	BP	GO:0050769	positive regulation of neurogenesis	102/6492	231/18903	0.00117855	0.0140148	0.0105609	KDM1A/SOX8/CX3CL1/PAFAH1B1/SS18L2/CUL7/CAMK2B/NTN1/ASPM/WDR62/PLXNA2/TP73/DCT/RAB21/LRP2/SMARCD3/E2F1/FBXO31/EEF2K/NUMBL/MEGF8/MAG/WNT2/LIMK1/CXCL12/NEURL1/WNT3/ASPA/RND2/MDK/IFNG/NR2E1/SRF/HES1/PLXNA1/ID2/EPHA4/CXCR4/EGR2/NKX2-2/BMP2/MACF1/LIF/RNF112/PLXNA3/MAP1B/SERPINF1/EPHB2/NGF/IL6ST/IL6/BIN1/IL33/TLR2/ITPKA/ZNF365/FGF2/DMRTA2/SLIT2/TTBK1/TIAM2/TENM4/ITGB1/DIXDC1/PTPRD/NPTN/LRP8/IL34/KIT/NKX…	102	0.441558
GO:1902893	BP	GO:1902893	regulation of miRNA transcription	33/6492	61/18903	0.00118457	0.0140605	0.0105954	SREBF1/NFATC3/PDGFB/NFATC4/GATA3/BMPR1A/SRF/NR3C1/MYB/FOXO3/EGR1/SOX9/BMP2/SMARCA4/RARA/ETS1/KLF4/MYC/FGF2/MYOCD/GATA6/SMAD4/NFIB/TERT/STAT3/FOS/APLN/FOSL1/JUN/WT1/PPARA/TEAD1/POU5F1	33	0.540984
GO:0051882	BP	GO:0051882	mitochondrial depolarization	14/6492	20/18903	0.00122378	0.0144728	0.010906	DCN/GCLM/MYOC/P2RX7/PPP2R3C/ABL1/IFI6/KDR/BCL2/BOK/FZD9/LRRK2/SRC/MLLT11	14	0.7
GO:0098698	BP	GO:0098698	postsynaptic specialization assembly	14/6492	20/18903	0.00122378	0.0144728	0.010906	CBLN1/NRXN2/SLITRK3/ARHGEF9/LRRC4B/NTRK3/LRRTM2/PTPRD/ZDHHC12/NPTX1/PTEN/LRFN4/NRXN1/IL1RAP	14	0.7
GO:0043392	BP	GO:0043392	negative regulation of DNA binding	29/6492	52/18903	0.00122674	0.0144813	0.0109125	KDM1A/TFAP4/JAK2/HMOX1/NFKBIA/E2F1/GATA1/LHX2/MDFI/HAND1/MAD2L2/NEK2/WFIKKN1/HABP4/PER2/HEY2/ZNF462/HMGA2/MSX1/HAND2/HEY1/ANKRD33/WFIKKN2/SOX11/JUN/SUMO4/CTNNBIP1/ZNF675/CPNE1	29	0.557692
GO:0072111	BP	GO:0072111	cell proliferation involved in kidney development	15/6492	22/18903	0.00124262	0.0145889	0.0109935	PDGFB/GATA3/STAT1/EGR1/BMP2/LIN28A/MYC/OSR1/IL6R/SHH/SERPINB7/PDGFD/WT1/PTCH1/ITGB3	15	0.681818
GO:2000310	BP	GO:2000310	regulation of NMDA receptor activity	15/6492	22/18903	0.00124262	0.0145889	0.0109935	MAPK8IP2/RASGRF1/MEF2C/CCL2/IFNG/EPHB2/CRHBP/CRH/PINK1/IFNGR2/NLGN1/CNIH2/RELN/SLC6A9/DAPK1	15	0.681818
GO:2000810	BP	GO:2000810	regulation of bicellular tight junction assembly	15/6492	22/18903	0.00124262	0.0145889	0.0109935	ROCK1/TJP1/IL17A/SNAI1/NPHP4/ROCK2/EPHA2/NPHP1/F11R/FZD5/CLDN1/CLDN3/GPBAR1/CLDN5/MYO1C	15	0.681818
GO:0048872	BP	GO:0048872	homeostasis of number of cells	127/6492	296/18903	0.00125811	0.014744	0.0111104	KMT2E/BAK1/ARID4A/KITLG/TGFBR3/POLB/NLE1/MEF2C/BAX/P2RX7/PPP2R3C/JAK2/ABL1/LGALS2/HMOX1/SOS2/RASSF2/GATA1/ERCC2/KLF1/DNASE2/ZNHIT1/EZH2/GATA3/PPP3CB/CDK5RAP3/HOXB6/IL2/TCIRG1/RHAG/SRF/BCL6/STAT1/ID2/AKT3/MPL/KMT2A/TNFAIP3/MYB/FOXO3/NKX2-3/MYCT1/FLT3/INHBA/NCKAP1L/INHA/SOX4/CXCL6/SOX9/THRA/PRMT1/ARMCX1/KLF2/ZFP36/EPO/ETS1/ANXA1/EMX1/RC3H1/IL6/SLC39A3/BCL10/DYRK3/ITPKB/ZC3H8/OCIAD2/NCAPG2/DOCK11/MF…	127	0.429054
GO:0014066	BP	GO:0014066	regulation of phosphatidylinositol 3-kinase signaling	54/6492	111/18903	0.00127096	0.0148492	0.0111896	WNT16/DCN/IGF1/HGF/MYOC/ERBB3/MYDGF/FGFR1/TREM2/SIRT1/JAK2/PDGFB/PPP1R16B/MAZ/PIP5K1B/UNC5B/CRYBA1/CSF3/PTPN6/TEK/CAT/FLT3/SOX9/KDR/PDGFRA/PRR5L/DAB2IP/CEP55/FGF2/NTRK3/PDGFC/INPP5E/ANGPT1/KIT/PLXNB1/GPER1/SERPINA12/NLRC3/ROR2/SEMA3E/FSHR/PDGFD/PTEN/SELP/CD28/F2/F2R/ROR1/PIP5K1C/RELN/SRC/LIME1/INS/GH1	54	0.486486
GO:0030879	BP	GO:0030879	mammary gland development	65/6492	138/18903	0.00127167	0.0148492	0.0111896	ATP2C2/NTN1/FGF10/GLI2/PGR/BAX/ESR1/JAK2/LRP5L/ARHGAP5/FOXF1/CAV1/WNT2/GHRHR/GATA3/NEURL1/WNT3/NFKB1/AREG/CCND1/OAS2/NR3C1/UMPS/IGFBP5/ID2/TGFB3/TNFSF11/SOCS2/TBX2/SOX9/STAT5A/TPH1/CDO1/FGF2/BRCA2/PML/EPHA2/PAM/BCL2L11/XDH/HK2/ARHGAP35/MSX1/TGFA/PYGO2/TGFBR2/ATP7A/AR/FASN/HOXB9/APLN/RXFP1/FOXB1/MTX1/STAT5B/SLC29A2/SCRIB/OXTR/IQGAP3/PTCH1/SRC/APRT/DDR1/GPX1/NME1	65	0.471014
GO:0018108	BP	GO:0018108	peptidyl-tyrosine phosphorylation	159/6492	380/18903	0.00127932	0.0149116	0.0112367	FYN/GPRC5A/IGF1/CNTN1/HGF/MUSK/MAP2K3/EPHA3/ROS1/KITLG/TNK2/LTK/ERBB3/TIE1/PKM/PRKCZ/FGF10/EPHA8/FGFR1/EPHA6/IL12RB2/TYRO3/TREM2/JAK2/ABL1/PDGFB/RPS6KA5/BMX/GATA1/HTR2A/ARL2BP/RIPK2/SFRP1/DYRK1B/TYK2/CAV1/MET/FGF8/NEURL1/CSF3/UNC119/AREG/IL2/HIPK3/CD81/IL23A/IFNG/PTPN6/NEDD9/DUSP22/TTK/GHR/HBEGF/ITK/HRG/HES1/ZAP70/EFEMP1/EPHA4/ERRFI1/TEK/ADRA1A/CD80/FLT3/EREG/SRMS/DYRK2/KDR/LIF/EPO/VPS25/EPHB2/IL…	159	0.418421
GO:0051281	BP	GO:0051281	positive regulation of release of sequestered calcium ion into cytosol	24/6492	41/18903	0.00128858	0.0149924	0.0112976	CX3CL1/BAX/ABL1/BDKRB1/CEMIP/PKD2/LHCGR/CXCL9/XCL1/TRPC1/SNCA/JPH2/AKAP6/GPER1/IL13/CXCL10/CXCL11/P2RY6/HAP1/CD19/F2/F2R/CALM1/GSTM2	24	0.585366
GO:0010232	BP	GO:0010232	vascular transport	44/6492	87/18903	0.00129672	0.0150094	0.0113104	SLC6A13/SLC38A5/ATP1A2/ATP2B4/SLC2A3/ABCC9/TFRC/ATP2A3/SLC1A3/LRP2/ABCB1/SLC5A1/SLC5A5/SLC38A1/SLC1A4/LEPR/SLC8A2/SLC16A7/KCNJ8/LRP1/ABCC4/ATP1B2/SLC6A6/SLC38A2/SLC28A2/SLC5A6/SLCO1C1/SLC22A3/SLC16A2/SLC2A13/SLC6A20/SLC7A3/AVPR1A/SLC27A4/SLC19A1/SLC29A2/SLC22A1/SLC2A4/SLC24A3/SLC38A3/SLC6A9/SLC6A17/SLC5A3/AGER	44	0.505747
GO:0150104	BP	GO:0150104	transport across blood-brain barrier	44/6492	87/18903	0.00129672	0.0150094	0.0113104	SLC6A13/SLC38A5/ATP1A2/ATP2B4/SLC2A3/ABCC9/TFRC/ATP2A3/SLC1A3/LRP2/ABCB1/SLC5A1/SLC5A5/SLC38A1/SLC1A4/LEPR/SLC8A2/SLC16A7/KCNJ8/LRP1/ABCC4/ATP1B2/SLC6A6/SLC38A2/SLC28A2/SLC5A6/SLCO1C1/SLC22A3/SLC16A2/SLC2A13/SLC6A20/SLC7A3/AVPR1A/SLC27A4/SLC19A1/SLC29A2/SLC22A1/SLC2A4/SLC24A3/SLC38A3/SLC6A9/SLC6A17/SLC5A3/AGER	44	0.505747
GO:0030902	BP	GO:0030902	hindbrain development	71/6492	153/18903	0.00129699	0.0150094	0.0113104	CNTN1/HSPA5/CTNNA2/RORA/GLI2/PLXNA2/OPHN1/LHX5/ABL1/CBLN1/HERC1/OGDH/EZH2/KAT2A/MDK/GLI1/BMP5/HES1/OTX1/WLS/PTBP2/PROX1/KIF14/HOXB3/EGR2/TTBK2/ATP1B2/EPHB2/FAIM2/TBR1/ZNF365/FGF2/SSTR1/RERE/NFIB/ITGB1/DIXDC1/POU4F1/WNT7A/EPHB1/GART/CBS/NCSTN/LMX1A/EN1/SHH/DLC1/EN2/CDK5/ATP7A/CKB/GBX2/MECP2/ATF5/CDK5R2/NEUROD2/BCL2/HAP1/SPTBN2/FZD4/CDK5R1/NHLH2/PTPN11/SCRIB/PSMG1/CEND1/NANOS1/LPAR1/CD3E/GDF10/LHX1	71	0.464052
GO:0071902	BP	GO:0071902	positive regulation of protein serine/threonine kinase activity	101/6492	229/18903	0.00130035	0.0150214	0.0113194	DBF4/PKD1/KITLG/ATP2B4/FERMT2/FGFR1/MEF2C/P2RX7/CDC6/SIRT1/PDGFB/TCL1A/TELO2/CD40LG/HTR2A/RGCC/CEMIP/PIH1D1/EZH2/BMPR1A/DKK1/CCND1/IFNG/TPD52L1/SASH1/GHR/PDCD10/EPHA4/PROX1/SLC8A2/PKD2/CCND2/TNFSF11/FLT3/CKS2/BMP2/TRAF2/AJUBA/MAP3K10/CCNB1/CAMK1/PSRC1/HTR2B/SPRY2/SPDYE1/DAB2IP/TLR4/THBS1/FGF2/BMPR1B/PDE5A/NTRK3/IQGAP1/RPTOR/ERBB2/SNCA/PDGFC/INCENP/HMGA2/ADRA2A/ADAM8/ADAM17/FGF18/IL34/KIT/SPATC1L/…	101	0.441048
GO:0010517	BP	GO:0010517	regulation of phospholipase activity	35/6492	66/18903	0.00136425	0.0157314	0.0118545	SELE/ARHGAP6/LPAR2/PRKCZ/FGFR1/ADCYAP1R1/ESR1/ABL1/HTR2A/ITK/RGS2/ADRA1A/LRP1/S1PR4/PLA2G5/ANGPTL3/PDGFRA/ANXA1/GPR55/HTR2B/FGF2/AGTR1/SNCA/EDNRA/GNAQ/KIT/AVPR1A/P2RY12/NMUR1/P2RY6/RASGRP4/HRAS/LPAR1/ANG/APOC2	35	0.530303
GO:0000041	BP	GO:0000041	transition metal ion transport	51/6492	104/18903	0.00136863	0.0157538	0.0118714	FKBP4/ATP2C1/SLC11A1/CP/ATP2C2/CYBRD1/TFRC/SLC46A1/HEPH/SLC22A17/SLC30A4/SLC39A14/ATP13A1/TFR2/IFNG/SLC39A7/HRG/STEAP3/SLC30A3/FLVCR2/CUTC/STEAP4/FTHL17/TRPC4/SLC39A11/TCN1/TMEM165/ISCU/SLC31A2/TRPC6/COX17/TRPC3/SLC39A8/SLC39A5/SLC39A3/TRPM2/SLC39A1/TRPC1/SLC39A4/SLC30A2/FLVCR1/SFXN1/ATP7A/TTYH1/SCARA5/MMGT1/ARHGAP1/HEPHL1/SLC30A10/SLC39A10/ASIC3	51	0.490385
GO:0006275	BP	GO:0006275	regulation of DNA replication	64/6492	136/18903	0.00141901	0.0163048	0.0122865	DBF4/JADE2/RFC2/MCM2/GLI2/TIPIN/MCM6/JADE1/ATRX/CDC6/CDC7/MCM5/GINS1/ACTR5/MCM4/TFPT/GLI1/RFC5/TIMELESS/FBXO5/MCM3/GMNN/BCL6/INO80B/CDK2/WRNIP1/EREG/CHTF18/E2F8/MAS1/GINS2/PCNA/RFC3/LPIN1/ACTL6A/DSCC1/DNA2/ACVRL1/BRCA2/TICRR/CCNA2/GINS4/DONSON/DBF4B/S100A11/UCN/RFC4/E2F7/MCM7/CDT1/CDK1/ESCO2/KCTD13/RUVBL1/ATAD5/ZBTB38/CTC1/GINS3/RUVBL2/TSPYL2/BLM/MCIDAS/POLG2/DACH1	64	0.470588
GO:0071456	BP	GO:0071456	cellular response to hypoxia	70/6492	151/18903	0.00144438	0.0165668	0.012484	RORA/PTGS2/ENO1/KCNK2/TREM2/SIRT1/HMOX1/SLC8A3/E2F1/SUV39H1/PGK1/RGCC/SFRP1/TBL2/NFE2L2/EPHA4/OPRD1/MPL/FOXO3/DNMT3A/EGR1/PTGIS/GNGT1/AJUBA/JUND/VHL/ROCK2/HILPDA/MDM2/BRIP1/MYC/CPEB2/MGARP/GATA6/RPTOR/CCNA2/KCNMB1/HYOU1/ADAM8/PDK1/SUV39H2/PINK1/STC1/CBS/LMNA/AK4/DDR2/FABP1/TERT/CITED2/ATP7A/AQP3/VASN/FOS/PRKCE/KCNK3/BCL2/PTEN/NDNF/PLK3/CD34/SLC2A4/SLC8A1/IRAK1/KCND2/P4HB/ZFP36L1/SRC/CPEB1/AQP1	70	0.463576
GO:0048041	BP	GO:0048041	focal adhesion assembly	43/6492	85/18903	0.00145336	0.0166404	0.0125394	MYOC/VCL/EPHA3/GPM6B/ARHGAP6/SLK/ROCK1/ACTN1/FERMT2/CLASP1/CAMSAP3/ACTN2/COL16A1/SORBS1/ABL1/CORO2B/SFRP1/DUSP3/CORO1C/DUSP22/HRG/TEK/MACF1/KDR/AJUBA/ROCK2/TLN1/THBS1/ACVRL1/PHLDB2/MMP14/DLC1/GREM1/FAM107A/BCL2/PTEN/RHOD/PEAK1/RCC2/APOD/SRC/STON1/ACTN3	43	0.505882
GO:2001251	BP	GO:2001251	negative regulation of chromosome organization	48/6492	97/18903	0.0014638	0.0167068	0.0125895	MAD1L1/SPDL1/SMG6/TRIP13/MCM2/NDC80/ATRX/BIRC5/NAA10/FBXO5/TTK/MAD2L2/CDC20/CENPF/DUSP1/ZWINT/XRCC3/TOP2A/SLX1A/CCNB1/CDCA8/APC/NAT10/ESPL1/PIF1/NUF2/ATM/INCENP/SPC25/BUB3/BUB1B/SPC24/MAD2L1/PTTG1/PRAP1/PLK1/CDT1/BUB1/EXOSC10/DCP2/ZWILCH/GEN1/CTC1/AURKB/SLX1B/KNTC1/SRC/LCMT1	48	0.494845
GO:0031667	BP	GO:0031667	response to nutrient levels	194/6492	474/18903	0.00146673	0.0167068	0.0125895	AOC1/PDK4/PDK2/GCLM/RRAGD/OTC/HSPA5/CYBA/NUCB2/ASNS/TFRC/SREBF1/PTGS2/NUAK1/ACAT1/PAX2/ACACB/SCTR/ULK2/NCOA1/EIF2AK1/BAX/COMT/CYP26A1/SIRT1/PICK1/HMOX1/SLC10A1/PCK2/AHCY/LIPG/SUV39H1/PCSK1N/PHEX/SFRP1/FGF21/PRKAG2/TBL2/KAT2A/UCP1/PPARGC1A/CCND1/FOLR1/CYP27B1/SOD2/TFEB/SRF/GHR/DAP/ARSB/CPEB4/BCHE/NPRL2/IL1A/STAT1/IGFBP2/KYNU/NFE2L2/ACADM/PROX1/KPTN/FOXO3/SPP1/DNMT3A/LRP11/TRIM25/LRAT/CAT/TRIM24/CD…	194	0.409283
GO:0010810	BP	GO:0010810	regulation of cell-substrate adhesion	98/6492	222/18903	0.00146725	0.0167068	0.0125895	ITGA3/CX3CL1/MYOC/VCL/EPHA3/GPM6B/ARHGAP6/PKP2/SLK/PRKCZ/ROCK1/LIMS2/FERMT2/CLASP1/CAMSAP3/FBLN1/COL16A1/CCDC80/UNC13D/JAK2/ABL1/PDGFB/FERMT1/FOXF1/CORO2B/SFRP1/ECM2/KANK1/DUSP3/MDK/CORO1C/NEDD9/DUSP22/HRG/BCL6/CSPG5/NID1/APOA1/ONECUT2/TEK/PLAU/RRAS/MACF1/KDR/MEN1/ROCK2/TLN1/THBS1/EMILIN1/ACVRL1/ADAM15/PHLDB2/PIK3R1/CASK/CDKN2A/RSU1/DOCK1/CCL28/DMP1/UTRN/ABI3BP/FZD7/MMP14/ITGA5/ALOX15/FBLN2/EDIL3…	98	0.441441
GO:0010332	BP	GO:0010332	response to gamma radiation	31/6492	57/18903	0.00147208	0.0167068	0.0125895	KDM1A/BAK1/HSPA5/RAD51/CYBA/POLB/BAX/GATA3/CCL7/CRYAB/SOD2/IL1A/EGR1/CDKN1A/MEN1/MDM2/MYC/YAP1/BRCA2/PML/FANCD2/ATM/CXCL10/BCL2L1/BCL2/HRAS/CHEK2/DCUN1D3/XRCC2/GPX1/PRKDC	31	0.54386
GO:0051932	BP	GO:0051932	synaptic transmission, GABAergic	31/6492	57/18903	0.00147208	0.0167068	0.0125895	GABRA3/GABRE/NALCN/CA2/EZH2/GABRA4/SLC38A1/GABRG2/TACR1/PLCL1/ADRA1A/SLITRK3/HTR1B/STXBP1/GABBR2/CLSTN3/GABRA2/ZDHHC12/GABRG1/ADORA1/CA7/RAC3/NLGN1/KIF5B/PRKCE/PTEN/HAP1/NPAS4/OXTR/CLN3/CNR2	31	0.54386
GO:0140013	BP	GO:0140013	meiotic nuclear division	87/6492	194/18903	0.0014893	0.0168727	0.0127145	RAD51/NDC1/FOXJ2/ASPM/RPS6KA2/TRIP13/MOV10L1/ZCWPW1/NDC80/RAD54L/AURKA/CDC25B/CCNE1/RAD51AP1/FBXO5/TTK/SMC4/CDC20/MASTL/NCAPH/MND1/KIF18A/CKS2/KLHDC3/EREG/HSPA2/PRDM7/LIF/PSMC3IP/TOP2A/FIGNL1/CCNA1/SPIRE1/ESPL1/BRIP1/SMC2/SLC2A8/DMRT1/BRCA2/SPATA22/P3H4/NUF2/HORMAD1/FANCD2/STRA8/ATM/INCENP/DDX4/BCL2L11/EME1/FBXO43/BUB1B/CCNB2/M1AP/ANKLE1/HSF2BP/SYCE2/MEIOB/HFM1/MSX1/SPDYA/PRDM9/PTTG1/PLK1/BUB1/PD…	87	0.448454
GO:0051893	BP	GO:0051893	regulation of focal adhesion assembly	34/6492	64/18903	0.00152529	0.0172201	0.0129762	MYOC/VCL/EPHA3/GPM6B/ARHGAP6/SLK/ROCK1/FERMT2/CLASP1/CAMSAP3/COL16A1/ABL1/SFRP1/DUSP3/CORO1C/DUSP22/HRG/TEK/MACF1/KDR/ROCK2/TLN1/THBS1/ACVRL1/PHLDB2/MMP14/DLC1/GREM1/FAM107A/PTEN/PEAK1/RCC2/APOD/SRC	34	0.53125
GO:0090109	BP	GO:0090109	regulation of cell-substrate junction assembly	34/6492	64/18903	0.00152529	0.0172201	0.0129762	MYOC/VCL/EPHA3/GPM6B/ARHGAP6/SLK/ROCK1/FERMT2/CLASP1/CAMSAP3/COL16A1/ABL1/SFRP1/DUSP3/CORO1C/DUSP22/HRG/TEK/MACF1/KDR/ROCK2/TLN1/THBS1/ACVRL1/PHLDB2/MMP14/DLC1/GREM1/FAM107A/PTEN/PEAK1/RCC2/APOD/SRC	34	0.53125
GO:0090276	BP	GO:0090276	regulation of peptide hormone secretion	81/6492	179/18903	0.00155194	0.017466	0.0131615	ABCC8/NOS2/TFAP2B/SYT7/SREBF1/SIRT6/AACS/SLC8B1/JAK2/LRP5L/PICK1/PCK2/HNF4A/CDK16/SFRP1/STX1A/GHRHR/TFR2/PPP3CB/TCIRG1/IFNG/PASK/KLF7/TNFSF11/SOX4/PAX8/FOXA2/KCNA5/TRPM4/ANO1/NR0B2/PER2/GRP/MTNR1B/CLOCK/GLUL/IL6/BLK/UQCC2/PDX1/ADCYAP1/TRPM2/ABCA12/EPHA5/CRHBP/HTR2C/CRH/SIDT2/ADRA2A/FOXO1/PFKM/KCNB1/GIP/INHBB/NKX6-1/UCN/SLC9B2/GPER1/RAB8B/STXBP4/MIDN/IRS1/MYRIP/KISS1/TRH/PRKCE/JAGN1/CHD7/FGG/FGA/F…	81	0.452514
GO:0060191	BP	GO:0060191	regulation of lipase activity	45/6492	90/18903	0.00155247	0.017466	0.0131615	SELE/ARHGAP6/LPAR2/PRKCZ/FGFR1/ADCYAP1R1/APOH/ESR1/ABL1/PCSK5/HTR2A/APOA5/APOC3/ITK/RGS2/APOA1/ADRA1A/LRP1/S1PR4/PLA2G5/APOC1/ANGPTL3/SORT1/PDGFRA/ANXA1/GPR55/HTR2B/FGF2/PCSK6/AGTR1/SNCA/EDNRA/GNAQ/KIT/APOA2/AVPR1A/P2RY12/NMUR1/P2RY6/RASGRP4/HRAS/LPAR1/ANG/APOC2/GPIHBP1	45	0.5
GO:0030072	BP	GO:0030072	peptide hormone secretion	99/6492	225/18903	0.0015822	0.0177482	0.0133742	ABCC8/NOS2/TFAP2B/SYT7/PTPRN/GAL/SREBF1/TACR2/SIRT6/AACS/SLC8B1/RAPGEF4/JAK2/LRP5L/PICK1/PCK2/HNF4A/CDK16/SFRP1/STX1A/GHRHR/TFR2/RAB11FIP2/PPP3CB/CPE/TCIRG1/IFNG/SLC16A10/ACVR2B/PASK/KLF7/SNX19/TNFSF11/SOX4/PAX8/FOXA2/VGF/KCNA5/TRPM4/ANO1/NR0B2/PER2/GRP/MTNR1B/CLOCK/ANXA1/GLUL/IL6/BLK/IL1RN/UQCC2/PDX1/ADCYAP1/TRPM2/ABCA12/EPHA5/CRHBP/VIP/SLC16A2/HTR2C/CRH/CAMK2G/SIDT2/ADRA2A/FOXO1/PFKM/PTPRN2/KCN…	99	0.44
GO:0007568	BP	GO:0007568	aging	77/6492	169/18903	0.00158304	0.0177482	0.0133742	CX3CL1/GCLM/BAK1/POLB/TFRC/SREBF1/TP63/PTGS2/PAX2/MMP2/HTR2A/ERCC2/AMH/COMP/CASP2/NUDT1/DNMBP/PITX3/CRYAB/CTSC/SOD2/SCAP/IGFBP2/IGFBP5/NFE2L2/KMO/FOXO3/RPN2/TGFB3/DNMT3A/ADRA1A/CAT/INHBA/EPO/JUND/RGN/KRT33B/SERPINF1/CASP9/LOXL2/COL4A2/EDNRB/NR5A1/FGF2/CYP1A1/SMAD4/KCNMB1/IGFBP1/EDNRA/GFRA1/INHBB/CLDN1/TGFBR2/TPRA1/GJB2/AVPR1A/SRR/TACR3/P2RY1/FOS/KRT83/UCP2/FOXG1/TYMS/CTC1/AURKB/TH/NQO1/PENK/IRAK1…	77	0.455621
GO:0010906	BP	GO:0010906	regulation of glucose metabolic process	52/6492	107/18903	0.00159264	0.0178249	0.013432	PDK4/PDK2/CRY1/IGF1/DGAT2/RORA/ACACB/SIRT6/DUSP12/C1QTNF3/GCKR/SORBS1/SIRT1/MLYCD/KAT2A/PPARGC1A/NR3C1/KAT2B/SLC25A12/LEPR/ACADM/NLN/FOXA2/DYRK2/RGN/FOXK2/SIK1/IGFBP3/OGT/SOGA1/FOXO1/PDK1/RANBP2/PHKG2/PFKFB1/SLC45A3/SERPINA12/IGF2/MIDN/GPT/IRS1/ZNF692/MST1/CLK2/PGP/PPARA/SIRT7/WDR5/SRC/LCMT1/ACTN3/INS	52	0.485981
GO:0036294	BP	GO:0036294	cellular response to decreased oxygen levels	73/6492	159/18903	0.00160282	0.0179016	0.0134898	RORA/PTGS2/ENO1/KCNK2/TREM2/SIRT1/PICK1/HMOX1/SLC8A3/E2F1/SUV39H1/PGK1/RGCC/EEF2K/SFRP1/TBL2/CPEB4/NFE2L2/EPHA4/OPRD1/MPL/FOXO3/DNMT3A/EGR1/PTGIS/GNGT1/AJUBA/JUND/VHL/ROCK2/HILPDA/MDM2/BRIP1/MYC/CPEB2/MGARP/GATA6/RPTOR/CCNA2/KCNMB1/HYOU1/ADAM8/PDK1/SUV39H2/PINK1/STC1/CBS/LMNA/AK4/DDR2/FABP1/TERT/CITED2/ATP7A/AQP3/VASN/FOS/PRKCE/KCNK3/BCL2/PTEN/NDNF/PLK3/CD34/SLC2A4/SLC8A1/IRAK1/KCND2/P4HB/ZFP36L1…	73	0.459119
GO:0050921	BP	GO:0050921	positive regulation of chemotaxis	67/6492	144/18903	0.00160503	0.0179016	0.0134898	DAPK2/WNK1/FGF10/FGFR1/TREM2/PDGFB/MEGF8/MET/CXCL12/CCL7/MDK/IL23A/NEDD9/CCR6/SMOC2/SLAMF1/ARTN/F3/PGF/CXCR4/NCKAP1L/KDR/LBP/SWAP70/P2RX4/IL6/THBS1/ADAM10/FGF2/NTRK3/XCL1/S100A7/SLIT2/PLA2G7/ADAM17/CXCL13/FGF18/IL34/IL6R/STX3/CX3CR1/CXCL10/P2RY12/PDGFD/S1PR1/SCG2/IL16/CCL19/OXSR1/VEGFB/AKIRIN1/ANO6/CALR/DEFB124/CXCR2/TMEM102/GAS6/CCR4/PRKD1/NTF3/FGF16/LPAR1/STK39/SUCNR1/BMPR2/AGER/PRSS56	67	0.465278
GO:0003229	BP	GO:0003229	ventricular cardiac muscle tissue development	30/6492	55/18903	0.00164049	0.0182657	0.0137641	DSG2/PKP2/COL11A1/TGFBR3/LRP2/FKBP1A/TBX5/SMAD7/PPP1R13L/BMPR1A/HAND1/TNNC1/ID2/PROX1/TNNT2/TNNI3/HEY2/TPM1/SMAD4/EDNRA/POU4F1/TNNI1/MYL3/FOXH1/ADAMTS9/ZFPM2/CHD7/HEG1/NKX2-5/RYR2	30	0.545455
GO:0052547	BP	GO:0052547	regulation of peptidase activity	188/6492	459/18903	0.00165119	0.0183532	0.0138301	TFPI/FYN/PLAUR/DPEP1/BID/HGF/NLRP2/BAK1/TIMP2/CYFIP2/ROCK1/TP63/NLE1/PTGS2/ATP2A3/PAX2/FBLN1/CST7/LAMP3/BAX/BIRC5/TFAP4/NLRP1/SIRT1/JAK2/TIMP3/SERPINA4/PSME2/MMP9/BIRC7/CST4/EPPIN/PCSK1N/ITIH6/WFDC1/PYCARD/RIPK2/PIH1D1/PDCD5/BBC3/CAV1/CASP2/C5/AMBP/P2RX1/CRYAB/GAPDH/DAP/KNG1/HRG/SERPINI2/COL7A1/PSMD14/HSPE1/EPHA4/DHCR24/APH1A/F3/SERPINC1/RPS6KA1/RARRES1/CSTA/RECK/ITIH5/NR4A1/LRP1/PI3/SEMG2/SEMG1/…	188	0.409586
GO:0031128	BP	GO:0031128	developmental induction	21/6492	35/18903	0.00166649	0.0184002	0.0138655	SOX8/FGF10/SALL1/WNT2/FGF8/DKK1/WNT3/HOXC11/SOX9/BMP2/SIX1/GATA5/WNT2B/NKX2-1/FGF2/FZD5/HIPK1/SPRY1/MESP1/GDNF/AR	21	0.6
GO:0051567	BP	GO:0051567	histone H3-K9 methylation	21/6492	35/18903	0.00166649	0.0184002	0.0138655	KDM1A/JARID2/BRCA1/ARID4A/ATRX/DNMT3B/SIRT1/SMARCB1/SUV39H1/PIH1D1/MYB/PRDM12/DNMT1/PRDM5/SETDB1/SETD7/SUV39H2/LMNA/PRDM9/MECP2/BEND3	21	0.6
GO:0060914	BP	GO:0060914	heart formation	21/6492	35/18903	0.00166649	0.0184002	0.0138655	MKS1/MEF2C/LRP2/SMARCD3/TBX5/EYA1/BMPR1A/DKK1/FOLR1/HES1/BMP2/SIX1/GATA5/PIM1/FOXH1/LEMD2/HAND2/SOX17/MESP1/GNG5/RBM20	21	0.6
GO:0085029	BP	GO:0085029	extracellular matrix assembly	26/6492	46/18903	0.0016668	0.0184002	0.0138655	PHLDB1/GPM6B/TIE1/CLASP1/RGCC/HAS3/HAS1/PLOD3/SOX9/PXDN/RAMP2/HAPLN2/MYH11/EMILIN1/FBLN5/PHLDB2/NTNG1/IHH/ATP7A/MFAP4/LTBP3/TNXB/LAMB2/EFEMP2/GAS6/THSD4	26	0.565217
GO:0000079	BP	GO:0000079	regulation of cyclin-dependent protein serine/threonine kinase activity	56/6492	117/18903	0.00168575	0.0185777	0.0139993	PKD1/ACTB/TFAP4/CDC6/PDGFB/CDKN3/CDK5RAP1/RGCC/CCNE1/CDK5RAP3/CCND1/CCNG1/KAT2B/GADD45A/PROX1/TNFAIP3/PKD2/CCNI/CCND2/CKS2/CDKN1A/PKMYT1/CCNA1/MEN1/CCNB1/CDK7/PSRC1/APC/SPDYE1/MYOCD/CCNA2/CDKN2A/LATS2/ADAM17/CCNO/CCNB2/CDC25C/CCNF/DIRAS3/SPDYA/CDC25A/PLK1/HEXIM2/SPDYE5/CDK5R2/PTEN/CKS1B/CCNE2/CDK5R1/SERTAD1/SRC/BLM/SPDYC/IPO7/CEBPA/SPDYE6	56	0.478632
GO:0061614	BP	GO:0061614	miRNA transcription	33/6492	62/18903	0.00170537	0.018762	0.0141381	SREBF1/NFATC3/PDGFB/NFATC4/GATA3/BMPR1A/SRF/NR3C1/MYB/FOXO3/EGR1/SOX9/BMP2/SMARCA4/RARA/ETS1/KLF4/MYC/FGF2/MYOCD/GATA6/SMAD4/NFIB/TERT/STAT3/FOS/APLN/FOSL1/JUN/WT1/PPARA/TEAD1/POU5F1	33	0.532258
GO:0001776	BP	GO:0001776	leukocyte homeostasis	49/6492	100/18903	0.00171711	0.018859	0.0142113	BAK1/KITLG/MEF2C/BAX/P2RX7/PPP2R3C/ABL1/LGALS2/SOS2/PPP3CB/IL2/TCIRG1/MPL/TNFAIP3/NKX2-3/FLT3/NCKAP1L/CXCL6/ANXA1/RC3H1/IL6/SLC39A3/BCL10/ITPKB/ZC3H8/DOCK11/SLC7A11/ADAM17/BCL2L11/CCNB2/TSC22D3/XKR8/JAM3/RAG1/AXL/FADD/GPR183/BCL2/STAT5B/GAPT/CXCR2/F2R/HCAR2/PDE4B/ADA/LAT/TNFRSF13B/MIF/LYN	49	0.49
GO:0030278	BP	GO:0030278	regulation of ossification	58/6492	122/18903	0.00172009	0.0188598	0.0142118	GPM6B/MEF2C/P2RX7/SMAD7/GATA1/SFRP1/COMP/BMPR1A/DKK1/ZBTB16/MDK/CYP27B1/MGP/ACVR2B/TACR1/TGFB3/SRGN/EGR2/RUNX2/SOX9/BMP2/TMEM53/OMD/TPH1/TRPM4/KREMEN2/CHSY1/LRP4/TFAP2A/BMPR1B/FBN2/ECM1/OSR1/AHSG/DDR2/PKDCC/SGMS2/GREM1/SOST/LTBP3/ADRB2/S1PR1/PTGER4/BCL2/SOX11/ANO6/PTPN11/SLC8A1/TMEM119/TOB2/PBX1/ISG15/FZD9/ENPP1/BMPR2/IFITM5/ACTN3/GDF10	58	0.47541
GO:0007254	BP	GO:0007254	JNK cascade	78/6492	172/18903	0.00174111	0.0189578	0.0142857	WNT16/PAFAH1B1/MAPK8IP2/ZMYND11/TRAF1/SEMA3A/TRAF4/MAGI3/TRAF5/CYLD/SH2D3C/GADD45B/BIRC7/RASSF2/PYCARD/RIPK2/SFRP1/AMBP/DUSP3/NFKB1/MAPK10/HIPK3/LTBR/TPD52L1/DUSP22/IL1A/GADD45A/SLAMF1/MMP8/TNFSF11/MAPK8IP1/UNC5CL/PRMT1/TRAF2/ARHGEF6/GADD45G/MAP3K10/DUSP9/EDA2R/GPS2/MEN1/ANKRD6/DAB2IP/TLR4/SDCBP/MAPKBP1/MARVELD3/NCOR1/SFRP2/MFHAS1/PDCD4/DIXDC1/TNIK/WNT7A/EPHB1/FZD7/PINK1/FGF19/DUSP19/TLR3/DACT1/M…	78	0.453488
GO:0032060	BP	GO:0032060	bleb assembly	9/6492	11/18903	0.00174369	0.0189578	0.0142857	ANLN/MYLK/ROCK1/P2RX7/PMP22/EMP1/EMP3/ANO6/LPAR1	9	0.818182
GO:0048251	BP	GO:0048251	elastic fiber assembly	9/6492	11/18903	0.00174369	0.0189578	0.0142857	MYH11/EMILIN1/FBLN5/ATP7A/MFAP4/LTBP3/TNXB/EFEMP2/THSD4	9	0.818182
GO:0048563	BP	GO:0048563	post-embryonic animal organ morphogenesis	9/6492	11/18903	0.00174369	0.0189578	0.0142857	BAK1/BAX/EFEMP1/MFAP2/KDR/MYO7A/BCL2L11/FBN1/HMGN1	9	0.818182
GO:0070344	BP	GO:0070344	regulation of fat cell proliferation	9/6492	11/18903	0.00174369	0.0189578	0.0142857	FGF10/TREM2/E2F1/E2F3/PER2/FTO/PID1/VSTM2A/TFDP1	9	0.818182
GO:0014074	BP	GO:0014074	response to purine-containing compound	66/6492	142/18903	0.00178857	0.0193532	0.0145837	KDM1A/HSPA5/ABCC9/SREBF1/PTGS2/RAPGEF3/P2RX7/SLC26A3/EZR/HCN2/GATA1/EEF2K/AQP9/SLC5A5/P2RX1/AREG/STAT1/IGFBP5/RAP1A/CASQ2/PKD2/FOSB/VGF/CDO1/TRPM4/P2RX4/PNPT1/CYP1B1/HCN4/TRPC3/GATA6/TRPM2/PKLR/HCN3/CNGA3/SRD5A1/CRHBP/CHEK1/AKAP6/PPARGC1B/PFKFB1/STC1/INHBB/ADORA1/HSP90B1/P2RY12/P2RY1/FOS/P2RY6/PDE3A/FOSL1/PER1/PENK/SLC8A1/WT1/ZFP36L1/PDE2A/KCNJ11/ADA/ENPP1/RYR2/RYR3/GSTM2/SLC26A6/AQP1/PDXP	66	0.464789
GO:0007043	BP	GO:0007043	cell-cell junction assembly	70/6492	152/18903	0.00178895	0.0193532	0.0145837	VCL/PKP2/CLDN18/ROCK1/CDH19/FSCN1/ACTB/PKP1/EPB41L3/GRHL2/TBX5/OCEL1/ARVCF/SMAD7/TJP1/LSR/CAV1/MPDZ/CNTNAP1/IL17A/SRF/CDH6/ECT2/PARD6B/SNAI1/CDHR3/RAMP2/NPHP4/EPHB2/ROCK2/DSG1/APC/TLN1/CDH24/MARVELD3/EPHA2/NPHP1/ANK2/PARD3/MPP7/FER/PRKCA/F11R/CLDN14/FZD5/CLDN1/HIPK1/MICALL2/CLDN3/CLDN2/GJB2/JAM3/DCHS1/GJB1/TLN2/HEG1/CNTNAP2/UGT8/CDH5/GPBAR1/GJC1/CLDN5/CLDN6/CLDN24/PIP5K1C/GJA4/CLDN4/MYO1C/CLDN9/P…	70	0.460526
GO:0035264	BP	GO:0035264	multicellular organism growth	68/6492	147/18903	0.00179116	0.0193532	0.0145837	IGF1/WWTR1/APBA2/RARB/PALB2/GRHL2/ATRX/TMED2/EZR/PPP1R13L/ERCC2/COMP/GHRHR/APBA1/KAT2A/TNS2/GHR/SOCS2/STIL/SLC12A5/BBS2/STAT5A/KLF2/VIL1/RARA/NOTCH2/CDK4/TARBP2/FTO/SLC25A25/ATM/ARID5B/SPTBN4/FLVCR1/PKDCC/EN1/IHH/HESX1/SGPL1/PPIB/IGF2/STAT3/AR/ATF5/ADRB2/CLIC4/CHD7/BCL2/HEG1/STAT5B/SPTBN2/TBL1XR1/RMI1/CTC1/PTPN11/FOXS1/PLAG1/ZFP36L1/PTCH1/TAL2/ADRB3/STK40/XRCC2/ADARB1/DIO3/GIGYF2/MBD5/GH1	68	0.462585
GO:0051098	BP	GO:0051098	regulation of binding	155/6492	372/18903	0.00179202	0.0193532	0.0145837	KDM1A/PKD1/PLAUR/DDX11/IGF1/CDON/ROCK1/HDAC4/BCL3/TGFBR3/ATP2A3/ADD2/ACTB/RAP1GAP/SMARCD3/BAX/ADD1/AURKA/ARHGAP28/FKBP1A/TFAP4/GEMIN2/JAK2/ABL1/MFNG/CYP2D6/HMOX1/PDGFB/NFKBIA/NFATC4/MMP9/CTSZ/TRIB3/E2F1/GATA1/RIPK2/PPP2CB/ERCC2/MED25/CAV1/MET/LFNG/LHX2/GATA3/DKK1/CSF3/HDAC5/PRMT8/IFNG/BAG2/GMNN/MDFI/HAND1/CSNK1A1/HES1/PLCL1/EPHA4/MAD2L2/STMN1/NEK2/MMP8/IFIT2/TNFSF11/LRP1/HJURP/CDKN1A/SYMPK/BMP2/W…	155	0.416667
GO:0007422	BP	GO:0007422	peripheral nervous system development	41/6492	81/18903	0.00182671	0.0196727	0.0148244	SOX8/MYOC/ERBB3/FA2H/ARHGEF10/PRX/CNTNAP1/PMP22/ARTN/ONECUT2/EGR2/ITGB4/HAPLN2/NGF/EDNRB/ERBB2/RXRG/GFRA3/PARD3/POU4F1/LGI4/SKI/ISL2/CLDN1/NFASC/HAND2/CITED2/CDK5/ILK/GDNF/SH3TC2/CDK1/LAMB2/UGT8/BDNF/NHLH2/EGR3/NTF3/SCN8A/SLC5A3/PLXNA4	41	0.506173
GO:0019933	BP	GO:0019933	cAMP-mediated signaling	29/6492	53/18903	0.00182769	0.0196727	0.0148244	GAL/ADCY2/ADCYAP1R1/RAPGEF3/SCTR/CDC34/RASD2/GHRHR/GLP1R/CAP2/PDE4D/PEX5L/SOX9/OPRL1/GNAI1/ADCYAP1/EPHA5/AKAP6/PDE3B/GPR61/GIP/UCN/PDE7B/PDE3A/GPR3/FFAR4/PDE2A/LPAR1/PDE7A	29	0.54717
GO:0052548	BP	GO:0052548	regulation of endopeptidase activity	176/6492	428/18903	0.00185588	0.019943	0.0150281	TFPI/FYN/PLAUR/DPEP1/BID/HGF/NLRP2/BAK1/TIMP2/CYFIP2/ROCK1/TP63/NLE1/PTGS2/ATP2A3/PAX2/CST7/LAMP3/BAX/BIRC5/TFAP4/NLRP1/SIRT1/JAK2/TIMP3/SERPINA4/PSME2/MMP9/BIRC7/CST4/EPPIN/PCSK1N/ITIH6/WFDC1/PYCARD/RIPK2/PIH1D1/PDCD5/BBC3/CASP2/C5/AMBP/P2RX1/CRYAB/GAPDH/DAP/KNG1/HRG/SERPINI2/COL7A1/PSMD14/HSPE1/EPHA4/DHCR24/APH1A/F3/SERPINC1/RPS6KA1/RARRES1/CSTA/RECK/ITIH5/NR4A1/PI3/SEMG2/SEMG1/C3/CSTL1/BCL2L12…	176	0.411215
GO:2000628	BP	GO:2000628	regulation of miRNA metabolic process	38/6492	74/18903	0.00189099	0.0202866	0.0152871	SREBF1/NFATC3/PDGFB/NFATC4/GATA3/BMPR1A/NFKB1/SRF/NR3C1/MYB/FOXO3/EGR1/SOX9/BMP2/SMARCA4/RARA/ETS1/RC3H1/KLF4/MYC/PNPT1/FGF2/MYOCD/GATA6/SMAD4/NFIB/TERT/STAT3/FOS/APLN/HRAS/FOSL1/JUN/WT1/PPARA/TEAD1/LIN28B/POU5F1	38	0.513514
GO:0071453	BP	GO:0071453	cellular response to oxygen levels	79/6492	175/18903	0.00190911	0.0203908	0.0153656	RORA/ATP6AP1/PTGS2/ENO1/KCNK2/TREM2/SIRT1/PICK1/HMOX1/SLC8A3/E2F1/SUV39H1/PGK1/RGCC/EEF2K/SFRP1/CAV1/TBL2/CPEB4/NFE2L2/EPHA4/OPRD1/MPL/FOXO3/DNMT3A/EGR1/PTGIS/GNGT1/MYOD1/AJUBA/JUND/VHL/ROCK2/HILPDA/MDM2/BRIP1/MYC/CPEB2/MGARP/GATA6/RPTOR/CCNA2/KCNMB1/HYOU1/FOXO1/ADAM8/PDK1/SUV39H2/PINK1/STC1/CBS/LMNA/AK4/DDR2/FABP1/TERT/CITED2/ATP7A/AQP3/VASN/FOS/PRKCE/KCNK3/BCL2/PTEN/NDNF/PLK3/CD34/SLC2A4/SLC8A1…	79	0.451429
GO:0000819	BP	GO:0000819	sister chromatid segregation	104/6492	239/18903	0.00191016	0.0203908	0.0153656	MAD1L1/NCAPD2/DPF1/DDX11/TACC3/CUL3/SPDL1/SMARCD1/TRIP13/ACTB/SPAG5/SMC1B/KIF22/SMARCA2/NDC80/SMARCD3/ATRX/BIRC5/KIF4A/CDC6/SMARCB1/NAA10/AURKC/SMARCD2/NCAPG/FBXO5/TTK/SMC4/KAT2B/CHMP3/WRAP73/MAD2L2/CDC20/NEK2/CENPF/KIF14/DUSP1/NCAPH/KIF18A/ZWINT/CENPK/KIF25/XRCC3/DLGAP5/SMARCA4/KNSTRN/PHF10/TUBG1/TOP2A/CCNB1/PSRC1/CDCA8/APC/ESPL1/ACTL6A/SMC2/DSCC1/NUSAP1/KIF23/KIF11/CENPE/KATNB1/ANAPC11/KIF2C/NU…	104	0.435146
GO:0051403	BP	GO:0051403	stress-activated MAPK cascade	104/6492	239/18903	0.00191016	0.0203908	0.0153656	WNT16/PAFAH1B1/MAPK8IP2/ZMYND11/HGF/MAP2K3/TRAF1/SEMA3A/TRAF4/MAGI3/TRAF5/CYLD/EZR/SH2D3C/TREM2/GADD45B/BIRC7/RASSF2/PYCARD/RIPK2/SFRP1/AMBP/DUSP3/NFKB1/MAPK10/CRYAB/HIPK3/FOXM1/LTBR/IL26/TPD52L1/SASH1/DUSP22/PDCD10/IL1A/GADD45A/SLAMF1/MMP8/DUSP1/TNFSF11/MAPK8IP1/UNC5CL/BMP2/PRMT1/TRAF2/ZFP36/ARHGEF6/GADD45G/MAP3K10/DUSP9/EDA2R/GPS2/MEN1/ANKRD6/DAB2IP/TLR4/MYC/SDCBP/MAPKBP1/MARVELD3/NCOR1/SFRP2/M…	104	0.435146
GO:1904029	BP	GO:1904029	regulation of cyclin-dependent protein kinase activity	57/6492	120/18903	0.00192223	0.0204859	0.0154372	PKD1/ACTB/TFAP4/CDC6/PDGFB/CDKN3/CDK5RAP1/RGCC/CCNE1/CDK5RAP3/CCND1/CCNG1/KAT2B/GADD45A/PROX1/TNFAIP3/PKD2/CCNI/CCND2/CKS2/CDKN1A/PKMYT1/CCNA1/MEN1/CCNB1/CDK7/PSRC1/APC/SPDYE1/MYOCD/CCNA2/TTBK1/CDKN2A/LATS2/ADAM17/CCNO/CCNB2/CDC25C/CCNF/DIRAS3/SPDYA/CDC25A/PLK1/HEXIM2/SPDYE5/CDK5R2/PTEN/CKS1B/CCNE2/CDK5R1/SERTAD1/SRC/BLM/SPDYC/IPO7/CEBPA/SPDYE6	57	0.475
GO:0007098	BP	GO:0007098	centrosome cycle	63/6492	135/18903	0.00198572	0.0210968	0.0158976	CEP68/BRCA1/CNTLN/PPP1R12A/TUBE1/WDR62/PCM1/NDC80/AURKA/SIRT1/RANBP1/CEP76/CEP152/ARHGEF10/KAT2A/MDM1/CEP72/KAT2B/CHMP3/GADD45A/NEK2/PKD2/CDK2/STIL/PARD6B/KIF25/CEP250/XRCC3/CEP85/HAUS8/ROCK2/NAT10/KIAA1614/ODF2/KIF11/BRCA2/CEP131/PLK4/HAUS6/CHEK1/HAUS1/SASS6/PPP1R35/CCNF/SPICE1/CHMP4C/NDEL1/PLK1/SAC3D1/CEP120/ATF5/CDK1/CEP135/CCDC57/PDE4DIP/GEN1/XRCC2/DCTN1/NUP62/HAUS7/CCNL2/HAUS5/CHMP1B	63	0.466667
GO:0033002	BP	GO:0033002	muscle cell proliferation	107/6492	247/18903	0.00198608	0.0210968	0.0158976	CX3CL1/JARID2/IGF1/HGF/ELN/CYBA/FOXJ2/TGFBR3/PTGS2/NOTCH3/TP73/MEF2C/KCNK2/MMP2/TBX5/JAK2/ABL1/HMOX1/PDGFB/MMP9/FGF9/WNT2/VIPR2/OGN/BMPR1A/PRKAR1A/PPARGC1A/GLI1/IFNG/SOD2/HBEGF/NPR3/FOXP1/TACR1/STAT1/IGFBP5/ID2/MEF2D/MFN2/TNFAIP3/NR4A3/TGFB3/TBX2/CDKN1A/EREG/BMP2/SIX1/CNN1/DNMT1/HTR1B/HEY2/IL6/TLR4/PIM1/YAP1/THBS1/FGF2/TPM1/MYOCD/GATA6/VIP/IGFBP3/TENM4/PDCD4/ANGPT1/CXADR/ADAMTS1/EPHB1/SKI/PAXBP1/…	107	0.433198
GO:0019233	BP	GO:0019233	sensory perception of pain	50/6492	103/18903	0.00199674	0.0211406	0.0159305	FYN/PTGS2/MGLL/P2RX7/BDKRB1/HTR2A/TRPA1/GRIN2D/CXCL12/CCL2/KCNA1/IL1A/TACR1/OPRD1/HOXB8/CXCR4/OPRL1/PRDM12/ANO1/SPX/P2RX4/EDNRB/IL33/VIP/PTGES/EPHB1/GIP/NR2F6/CHRNB2/ADORA1/CDK5/SCN3B/TMEM100/SCN11A/MECP2/P2RY1/GPR171/KCNA2/ALOXE3/F2R/PENK/NDN/NIPSNAP1/KCND2/BACE1/CNR2/MME/ASIC3/AQP1/MC1R	50	0.485437
GO:0042472	BP	GO:0042472	inner ear morphogenesis	50/6492	103/18903	0.00199674	0.0211406	0.0159305	DLX6/COL11A1/NTN1/FGF10/PAX2/ITGA8/MYO15A/MYO3A/SIX4/FGF9/EYA1/HPN/DLX5/GATA3/FGF8/SOBP/PTK7/TBX18/OTX1/ATP6V1B1/KCNQ4/PROX1/TBX2/SOX9/PAX8/SIX1/EPHB2/SPRY2/TFAP2A/MYO7A/COL2A1/LRIG1/ZEB1/ZIC1/HESX1/FZD6/CTHRC1/GBX2/CHD7/TCAP/CHRNA9/FOXG1/FZD2/SCRIB/TBX1/ALDH1A3/PDZD7/HMX2/LHFPL5/STRC	50	0.485437
GO:0019318	BP	GO:0019318	hexose metabolic process	100/6492	229/18903	0.0020151	0.0213002	0.0160508	FUCA2/PDK4/SLC25A13/PDK2/TFAP2B/CRY1/IGF1/DGAT2/PKM/RORA/ENO1/ACACB/SIRT6/DUSP12/C1QTNF3/GCKR/AKR1B1/OAS1/SORBS1/SIRT1/SLC25A1/PCK2/SLC35A2/PGK1/MLYCD/SLC39A14/GAPDHS/BRAT1/GALK1/KAT2A/PPARGC1A/GAPDH/TPI1/NR3C1/KAT2B/PFKFB4/SLC25A12/LEPR/ACADM/GALE/NLN/FOXA2/DYRK2/RGN/PER2/ALDOB/SLC37A4/PDX1/PMM2/G6PC3/FOXK2/SIK1/GALM/IGFBP3/OGT/FUOM/SOGA1/FOXO1/PDK1/PFKM/RANBP2/HKDC1/HK1/PHKG2/PFKFB1/SLC45A3/ADP…	100	0.436681
GO:0060324	BP	GO:0060324	face development	28/6492	51/18903	0.00203561	0.0214818	0.0161877	GRHL2/MMP2/CRISPLD2/DLX5/ZFAND5/DKK1/MYH3/SRF/RAB3GAP1/TGFB3/HOXB3/RRAS/RARA/PDGFRA/STRA6/CSRNP1/ARID5B/EDNRA/SKI/MSX1/TIPARP/SGPL1/CHD7/PTPN11/TBX1/CLDN5/ALDH1A3/SCX	28	0.54902
GO:0007193	BP	GO:0007193	adenylate cyclase-inhibiting G protein-coupled receptor signaling pathway	40/6492	79/18903	0.00204854	0.0215831	0.016264	RGS1/PALM/HRH3/NPR3/OPRD1/RGS2/GRM4/OPRL1/GNAI1/GNAZ/MCHR1/AKAP12/CHRM3/HRH4/HTR1B/GABBR2/ADRA2A/EDNRA/OXER1/ADORA1/GRIK3/HTR4/HTR1E/P2RY12/P2RY1/S1PR1/ADCY5/PSAPL1/HTR1D/CHRM2/CHRM5/FFAR3/PDE2A/GRM7/FLNA/LPAR1/GRM3/S1PR3/CORT/ITGB3	40	0.506329
GO:0042326	BP	GO:0042326	negative regulation of phosphorylation	158/6492	381/18903	0.00205299	0.0215948	0.0162728	DBNDD1/PRKAR2B/SPAG9/GPRC5A/WWTR1/HGF/BAK1/PPP2R5A/PRKCZ/ROCK1/HDAC4/LRP6/SIRT6/FBLN1/GCKR/TMED2/BAX/IRAK3/TFAP4/SIRT1/ABL1/GADD45B/SLC8A3/BDKRB1/TRIB3/RASSF2/CDK5RAP1/SMAD7/PYCARD/SFRP1/CAV1/GRB10/PRKAG2/DKK1/GIT1/CDK5RAP3/DUSP3/PRKAR1A/IL2/HIPK3/CORO1C/IFNG/PTPN6/DUSP22/PDE4D/KAT2B/PRKAR2A/NPRL2/ERRFI1/GADD45A/RGS2/TNFAIP3/DUSP1/MAPK8IP1/INHBA/LRP1/INHA/PMEPA1/CDKN1A/FOXA2/BMP2/KIRREL2/WNK4/PTP…	158	0.414698
GO:0003156	BP	GO:0003156	regulation of animal organ formation	18/6492	29/18903	0.00208195	0.0218133	0.0164375	FGF10/WNT2/FGF8/DKK1/HOXC11/BMP2/SIX1/GATA5/WNT2B/SULF1/FGF2/SPRY1/CITED2/SHH/MESP1/GDNF/AR/WT1	18	0.62069
GO:0042759	BP	GO:0042759	long-chain fatty acid biosynthetic process	18/6492	29/18903	0.00208195	0.0218133	0.0164375	ACOT7/CYP2D6/ACSBG1/QKI/PLP1/ACSBG2/CYP2C9/CYP2C8/CYP1A1/CYP1A2/FADS1/CYP3A4/ALOX15/ELOVL6/ALOXE3/ALOX12B/ASAH2/GSTM2	18	0.62069
GO:0071772	BP	GO:0071772	response to BMP	80/6492	178/18903	0.00208726	0.0218133	0.0164375	ITGA3/TFAP2B/DLX3/NEO1/TGFBR3/LRP2/CHRD/HIVEP1/ABL1/SMAD7/CHRDL1/ZNF423/SFRP1/MEGF8/COMP/DLX5/HOXA13/GATA3/BMPR1A/DKK1/BMP5/HES1/ACVR2B/BMP8B/TGFB3/SFRP5/SMAD9/EGR1/TNFAIP6/RUNX2/SOX9/BMP2/TMEM53/KDR/GATA5/NOTCH2/KCP/ADAMTS7/SULF1/BMPR1B/COL2A1/SLC39A5/ACVRL1/PCSK6/TOB1/GATA6/SMAD4/DLX1/SFRP2/SCUBE3/CRB2/PDCD4/ADAMTS12/SKI/LEMD2/MSX1/FSTL1/TBX20/BMPER/SPINT1/FBN1/TMEM100/ILK/RBPMS2/GREM1/SPINT2/S…	80	0.449438
GO:0071773	BP	GO:0071773	cellular response to BMP stimulus	80/6492	178/18903	0.00208726	0.0218133	0.0164375	ITGA3/TFAP2B/DLX3/NEO1/TGFBR3/LRP2/CHRD/HIVEP1/ABL1/SMAD7/CHRDL1/ZNF423/SFRP1/MEGF8/COMP/DLX5/HOXA13/GATA3/BMPR1A/DKK1/BMP5/HES1/ACVR2B/BMP8B/TGFB3/SFRP5/SMAD9/EGR1/TNFAIP6/RUNX2/SOX9/BMP2/TMEM53/KDR/GATA5/NOTCH2/KCP/ADAMTS7/SULF1/BMPR1B/COL2A1/SLC39A5/ACVRL1/PCSK6/TOB1/GATA6/SMAD4/DLX1/SFRP2/SCUBE3/CRB2/PDCD4/ADAMTS12/SKI/LEMD2/MSX1/FSTL1/TBX20/BMPER/SPINT1/FBN1/TMEM100/ILK/RBPMS2/GREM1/SPINT2/S…	80	0.449438
GO:0006939	BP	GO:0006939	smooth muscle contraction	54/6492	113/18903	0.00210827	0.0219974	0.0165762	PIK3C2A/ATP1A2/PTGER3/ATP2B4/MYLK/ROCK1/PTGS2/TACR2/HTR2A/COMP/CAV1/ACTA2/P2RX1/SRF/TACR1/RGS2/ADRA1A/TBX2/BBS2/TNNI3/CNN1/CHRM3/MYH11/ROCK2/SPX/HTR2B/EDNRB/SULF1/MYOCD/ADRA2A/EDNRA/KCNMA1/KIT/CHRNB2/ADORA1/APBB2/GPER1/APBB1/BDKRB2/GDNF/ADRB2/TACR3/NMUR1/SPHK1/HTR1D/OXTR/CHRM2/F2R/SLC8A1/SETD3/SMTN/PRKG1/ADA/ADRA2B	54	0.477876
GO:0035914	BP	GO:0035914	skeletal muscle cell differentiation	37/6492	72/18903	0.00212018	0.0220861	0.0166431	SOX8/CDON/HMG20B/MEF2C/SIX4/ASB2/MYLK2/HLF/RBM24/MEF2D/EGR1/EGR2/NLN/NR4A1/SIX1/MYOD1/UQCC2/MYOCD/DMRTA2/GTF3C5/ANKRD1/VAX1/EPHB1/KLHL40/BTG2/LEMD2/ATF3/CITED2/SHH/ANKRD33/FOS/AKIRIN1/SOX11/TBX1/MAFF/KLHL41/SCX	37	0.513889
GO:2000615	BP	GO:2000615	regulation of histone H3-K9 acetylation	10/6492	13/18903	0.00212846	0.0221366	0.0166811	BRCA1/SPHK2/SMARCB1/PIH1D1/GATA3/KMT2A/SMAD4/CHEK1/PWWP2B/NAP1L2	10	0.769231
GO:0021675	BP	GO:0021675	nerve development	42/6492	84/18903	0.00218837	0.0227232	0.0171232	SEMA3F/ERBB3/CNGB1/SEMA3A/PAX2/SLC1A3/SIX4/SALL1/TCIRG1/HES1/PLXNA1/NRP2/HOXB3/EGR2/NKX2-2/SIX1/PLXNA3/EPHB2/NGF/TFAP2A/SULF1/SLC24A4/ACKR3/LRIG1/EDNRA/POU4F1/EPHB1/CHRNB2/CITED2/ILK/NRTN/NPTX1/CHD7/FBXO45/BDNF/KCNA2/ATOH7/TBX1/NTF3/ADARB1/LPAR1/PLXNA4	42	0.5
GO:0048706	BP	GO:0048706	embryonic skeletal system development	60/6492	128/18903	0.00220056	0.0228108	0.0171892	MKS1/COL11A1/GRHL2/TBX15/PCSK5/SIX4/FGF9/XYLT1/EYA1/MEGF8/FGF8/HOXB6/NKX3-2/MDFI/HYAL1/DLX2/TGFB3/HOXB8/HOXB5/HOXB3/MTHFD1L/HOXC11/RUNX2/SIX1/PDGFRA/TFAP2A/SULF1/COL2A1/SLC39A3/SLC39A1/WNT9A/OSR1/DLX1/ZEB1/EDNRA/MMP16/MMP14/FLVCR1/IHH/TGFBR2/HAND2/SHH/SHOX2/TAPT1/HOXB9/CHST11/HOXC5/DMRT2/SOX11/DSCAML1/HOXC9/HOXB4/TBX1/PBX1/HOXC6/HOXC4/HOXB7/SCX/LHX1/PCGF2	60	0.46875
GO:0016331	BP	GO:0016331	morphogenesis of embryonic epithelium	70/6492	153/18903	0.00220386	0.0228108	0.0171892	WNT16/SOX8/MKS1/CC2D2A/FGF10/TP63/PAX2/LRP2/GRHL2/TMED2/ABL1/SIX4/SALL4/CLUAP1/SFRP1/WNT2/LHX2/GATA3/FGF8/KAT2A/FOLR1/BMP5/PTK7/TBX18/HAND1/WNT6/MTHFD1L/STIL/SOX4/SOX9/PAX8/SIX1/RARA/WNT2B/TFAP2A/SULF1/KIF20B/SHROOM3/PRICKLE1/PDX1/TGFB1I1/BCL10/PRKACB/OSR1/SFRP2/ST14/SKI/ARHGAP35/CITED2/SHH/DLC1/FZD6/CTHRC1/SPINT1/GREM1/SPINT2/GDNF/AR/GLMN/KDF1/SOX11/MTHFR/FZD2/SCRIB/RGMA/ALDH1A3/PTCH1/PLXNB2/HES…	70	0.457516
GO:0090200	BP	GO:0090200	positive regulation of release of cytochrome c from mitochondria	17/6492	27/18903	0.00221571	0.0228969	0.017254	PLAUR/BID/BAK1/BAX/MMP9/PYCARD/BMF/PDCD5/BBC3/PPIF/HRK/CIDEB/BCL2L11/PINK1/GPER1/MOAP1/MLLT11	17	0.62963
GO:0006109	BP	GO:0006109	regulation of carbohydrate metabolic process	83/6492	186/18903	0.00223631	0.0230728	0.0173866	PDK4/PDK2/CRY1/IGF1/DGAT2/HDAC4/RORA/ACACB/SIRT6/ADCYAP1R1/DUSP12/C1QTNF3/GCKR/P2RX7/SORBS1/SIRT1/PDGFB/HTR2A/MLYCD/GAPDHS/PRKAG2/GIT1/KAT2A/NFKB1/PPARGC1A/IFNG/NR3C1/KAT2B/PASK/SLC25A12/LEPR/ACADM/NLN/FOXA2/DYRK2/CBFA2T3/MAS1/RGN/LHCGR/NCOR1/RPTOR/FOXK2/SIK1/SNCA/IGFBP3/OGT/SOGA1/FOXO1/PDK1/RANBP2/PHKG2/PFKFB1/SLC45A3/SLC2A6/PTH1R/PRKAA2/GPER1/SERPINA12/IGF2/MIDN/GPT/DDIT4/STAT3/IRS1/P2RY1/PRKCE…	83	0.446237
GO:0035886	BP	GO:0035886	vascular associated smooth muscle cell differentiation	23/6492	40/18903	0.00224379	0.0230765	0.0173893	NFATC3/PDGFB/NFATC4/NFATC2/FGF9/COMP/SOD2/QKI/SRF/HES1/DNMT1/NFATC1/RAMP2/HEY2/MYOCD/GATA6/PDCD4/EDNRA/KIT/SGCB/GPER1/MESP1/EFEMP2	23	0.575
GO:1903115	BP	GO:1903115	regulation of actin filament-based movement	23/6492	40/18903	0.00224379	0.0230765	0.0173893	ATP1A2/DSG2/PKP2/MYLK2/CAV1/ACTA2/PDE4D/TNNC1/TNNT2/FGF13/TRPM4/DSC2/BIN1/HCN4/CAMK2D/ANK2/CACNA1C/STC1/ADORA1/CTNNA3/PDE4B/PLN/RYR2	23	0.575
GO:0098813	BP	GO:0098813	nuclear chromosome segregation	135/6492	321/18903	0.00226366	0.0232438	0.0175155	MAD1L1/NCAPD2/DPF1/DDX11/TACC3/CENPQ/CUL3/SPDL1/NDC1/SMARCD1/TRIP13/ACTB/SPAG5/SMC1B/ZCWPW1/KIF22/SMARCA2/NDC80/SMARCD3/ATRX/BIRC5/KIF4A/CDC6/SMARCB1/FAM83D/NAA10/AURKC/CCNE1/SMARCD2/NCAPG/FBXO5/TTK/SMC4/KAT2B/ECT2/CHMP3/WRAP73/MAD2L2/CDC20/NEK2/CENPF/KIF14/DUSP1/NCAPH/MND1/KIF18A/ZWINT/CENPK/KIF25/XRCC3/DLGAP5/SMARCA4/KNSTRN/PHF10/TUBG1/PSMC3IP/TOP2A/CCNB1/PSRC1/CDCA8/APC/ESPL1/BRIP1/ACTL6A/SMC2…	135	0.420561
GO:0000302	BP	GO:0000302	response to reactive oxygen species	90/6492	204/18903	0.00227762	0.0233501	0.0175956	PDK2/FYN/HGF/BAK1/PTPRN/PAX2/MMP2/SIRT1/ABL1/HMOX1/MMP9/TRPA1/PPP2CB/MET/EZH2/SETX/PPIF/AREG/UCP1/SOD3/CRYAB/SOD2/PDCD10/ECT2/HYAL1/FOXP1/IL1A/TACR1/STAT1/NFE2L2/CRYGD/TNFAIP3/FOXO3/PKD2/NR4A3/CAT/ROMO1/KLF2/RNF112/KCNA5/KDM6B/PCNA/PDGFRA/ANXA1/NUDT15/IL6/IL18BP/CYP1B1/FBLN5/TPM1/TRPM2/S100A7/RHOB/SIGMAR1/FER/PPARGC1B/MAPK13/FANCC/PPP1R15B/PINK1/DDR2/ANKZF1/FABP1/NOS3/ATP7A/AXL/CDK1/FOS/PDGFD/BCL…	90	0.441176
GO:2001233	BP	GO:2001233	regulation of apoptotic signaling pathway	155/6492	374/18903	0.00231606	0.0237067	0.0178642	KDM1A/CX3CL1/MAPK8IP2/PLAUR/BRCA1/ZMYND11/BID/IGF1/HGF/GCLM/BAK1/DAPK2/TRAF1/TMEM161A/FGF10/MNT/TP63/NLE1/PTGS2/ENO1/FGFR1/CYLD/BAX/TREM2/SIRT1/JAK2/TIMP3/HMOX1/NFATC4/MMP9/SRPX/GATA1/PYCARD/MAZ/EYA1/SFRP1/PIH1D1/BBC3/CAV1/CASP2/CXCL12/UNC5B/PPIF/WFS1/CTSC/PTPMT1/LTBR/TPD52L1/SOD2/BMP5/EYA4/NME5/IL1A/NFE2L2/TXNDC12/TNFAIP3/HELLS/CLU/MAPK8IP1/INHBA/SNAI1/EEF1E1/RBCK1/PLAGL2/BCL2L12/IFI6/TRAF2/STYX…	155	0.414439
GO:0072273	BP	GO:0072273	metanephric nephron morphogenesis	16/6492	25/18903	0.00233818	0.0238952	0.0180063	SOX8/PKD1/PAX2/SALL1/HES1/STAT1/PKD2/SOX9/PAX8/LIF/KIF26B/GREM1/GDNF/WT1/HES5/LHX1	16	0.64
GO:0001558	BP	GO:0001558	regulation of cell growth	173/6492	422/18903	0.00235485	0.023936	0.0180371	SEMA3F/PAFAH1B1/SPAG9/SEMA3G/IGF1/PRDM11/FHL1/CDH1/RTN4R/ROS1/CYBA/IL17RB/OGFR/SPHK2/NTN1/KIF26A/IP6K2/RASGRP2/CDHR2/ENO1/SEMA3A/JADE1/RIMS1/RAB21/SMARCA2/EPB41L3/ULK2/LTBP4/NRCAM/DPYSL2/SEMA4G/SIRT1/ABL1/CGRRF1/BDKRB1/CPNE6/SGK2/HNF4A/SMAD7/WFDC1/SFRP1/PTPRS/MEGF8/DDX49/MAG/HPN/BRAT1/LIMK1/CXCL12/LGI1/WNT3/RND2/TMEM97/IL2/CRYAB/CYP27B1/SRF/DNPH1/HBEGF/HRG/BCL6/HYAL1/FOXP1/IGFBP5/LAMTOR2/MAD2L2/R…	173	0.409953
GO:0006271	BP	GO:0006271	DNA strand elongation involved in DNA replication	11/6492	15/18903	0.00237177	0.023936	0.0180371	GINS1/MCM4/LIG1/POLD2/MCM3/PCNA/RFC3/DNA2/RFC4/MCM7/POLE	11	0.733333
GO:0021534	BP	GO:0021534	cell proliferation in hindbrain	11/6492	15/18903	0.00237177	0.023936	0.0180371	RORA/LHX5/GLI1/FGF2/RERE/SHH/GBX2/ATF5/PSMG1/CEND1/LHX1	11	0.733333
GO:0021924	BP	GO:0021924	cell proliferation in external granule layer	11/6492	15/18903	0.00237177	0.023936	0.0180371	RORA/LHX5/GLI1/FGF2/RERE/SHH/GBX2/ATF5/PSMG1/CEND1/LHX1	11	0.733333
GO:0021930	BP	GO:0021930	cerebellar granule cell precursor proliferation	11/6492	15/18903	0.00237177	0.023936	0.0180371	RORA/LHX5/GLI1/FGF2/RERE/SHH/GBX2/ATF5/PSMG1/CEND1/LHX1	11	0.733333
GO:0032230	BP	GO:0032230	positive regulation of synaptic transmission, GABAergic	11/6492	15/18903	0.00237177	0.023936	0.0180371	NALCN/CA2/TACR1/ADRA1A/ZDHHC12/CA7/NLGN1/KIF5B/PRKCE/HAP1/OXTR	11	0.733333
GO:0071599	BP	GO:0071599	otic vesicle development	11/6492	15/18903	0.00237177	0.023936	0.0180371	FGF10/EYA1/GATA3/FGF8/PROX1/SOX9/PAX8/SIX1/COL2A1/HESX1/TCAP	11	0.733333
GO:0072075	BP	GO:0072075	metanephric mesenchyme development	11/6492	15/18903	0.00237177	0.023936	0.0180371	PAX2/SIX4/STAT1/TCF21/PKD2/SIX1/MYC/SMAD4/OSR1/SHH/WT1	11	0.733333
GO:0050920	BP	GO:0050920	regulation of chemotaxis	100/6492	230/18903	0.00237672	0.0239486	0.0180465	SEMA3F/MYCBP2/SEMA3G/DAPK2/WNK1/FGF10/SEMA3A/FGFR1/SLC8B1/SEMA4G/TREM2/PDGFB/MEGF8/MET/C5/CXCL12/WNT3/CCL7/CCL2/DUSP3/MDK/IL23A/NEDD9/CCR6/SMOC2/HRG/SLAMF1/PADI2/ARTN/F3/PGF/DUSP1/CXCR4/NCKAP1L/TNFAIP6/KDR/MTUS1/LBP/PLXNA3/MPP1/SWAP70/PDGFRA/P2RX4/SEMA4F/IL6/TBR1/THBS1/ADAM10/SEMA6D/FGF2/NTRK3/XCL1/S100A7/SLIT2/PLA2G7/ADAM17/CXCL13/FGF18/IL34/SLAMF8/IL6R/JAM3/STX3/GREM1/SEMA6B/CX3CR1/CXCL10/P2RY1…	100	0.434783
GO:0010676	BP	GO:0010676	positive regulation of cellular carbohydrate metabolic process	30/6492	56/18903	0.00238355	0.0239801	0.0180703	IGF1/DGAT2/ADCYAP1R1/SORBS1/SIRT1/KAT2A/PPARGC1A/KAT2B/SLC25A12/DYRK2/MAS1/RGN/LHCGR/SNCA/FOXO1/PHKG2/SLC45A3/PTH1R/GPER1/IGF2/GPT/IRS1/P2RY1/PRKCE/P2RY6/PPARA/WDR5/SRC/ACTN3/INS	30	0.535714
GO:1903035	BP	GO:1903035	negative regulation of response to wounding	46/6492	94/18903	0.00241581	0.0242669	0.0182864	TFPI/ABCC8/PLAUR/RTN4R/CLASP1/FAP/CPB2/APOH/PDGFB/WFDC1/PTPRS/GIT1/MDK/KNG1/HRG/PROC/EPHA4/SPP1/PLAU/KLK8/F12/APCS/PDGFRA/KIAA0319/THBS1/FGF2/MMRN1/CERS2/PHLDB2/CASK/UBASH3B/USF1/NOS3/CLDN3/FGG/FGA/FGB/PTEN/CD34/F2/RGMA/PROS1/PRKG1/AJAP1/SERPINB2/EPPK1	46	0.489362
GO:0070371	BP	GO:0070371	ERK1 and ERK2 cascade	142/6492	340/18903	0.0024381	0.0243303	0.0183342	CALCR/CX3CL1/IGF1/ROS1/LMO3/ABCA7/PRKCZ/FGF10/FERMT2/FBLN1/EZR/TREM2/ABL1/TIMP3/PDGFB/FAM83D/HTR2A/PYCARD/RIPK2/FGF21/GRB10/ACTA2/FGF8/CRYBA1/CCL7/CCL2/DUSP3/IL26/PTPN6/IL1A/CCL20/DNAJC27/EPHA4/ERRFI1/RAP1A/SLAMF1/TEK/TNFSF11/DUSP4/ADRA1A/INHBA/RAMP3/GLIPR2/SOX9/BMP2/RRAS/WNK4/PLA2G5/KDR/LIF/EPO/DUSP9/AKAP12/CHI3L1/EPHB2/DUSP26/NOTCH2/PDGFRA/EPHA7/GPR55/HTR2B/SPRY2/DAB2IP/TLR4/MYC/ARRB1/EMILIN1/D…	142	0.417647
GO:0002053	BP	GO:0002053	positive regulation of mesenchymal cell proliferation	15/6492	23/18903	0.00244093	0.0243303	0.0183342	CHRD/FGF9/FOXF1/WNT2/BMPR1A/STAT1/SOX9/SIX1/KDR/MYC/IHH/TGFBR2/SHH/SHOX2/TBX1	15	0.652174
GO:0021846	BP	GO:0021846	cell proliferation in forebrain	15/6492	23/18903	0.00244093	0.0243303	0.0183342	ARX/PCM1/DCT/LHX5/NUMBL/AKNA/FGF8/KIF14/SIX3/DIXDC1/WNT7A/IGF2BP1/HOOK3/CEP120/POU3F3	15	0.652174
GO:0050650	BP	GO:0050650	chondroitin sulfate proteoglycan biosynthetic process	15/6492	23/18903	0.00244093	0.0243303	0.0183342	XYLT2/CHPF2/XYLT1/B3GAT2/CHST3/CHPF/CHSY1/CSGALNACT1/B3GAT3/PXYLP1/CSGALNACT2/CYTL1/CHST11/B3GALT6/CHST13	15	0.652174
GO:0051383	BP	GO:0051383	kinetochore organization	15/6492	23/18903	0.00244093	0.0243303	0.0183342	NDC80/CENPT/SMC4/CENPA/CENPF/CENPK/DLGAP5/SMC2/CENPE/NUF2/CENPH/CENPN/CDT1/KNTC1/CENPW	15	0.652174
GO:0034754	BP	GO:0034754	cellular hormone metabolic process	65/6492	141/18903	0.00247296	0.0246117	0.0185462	HSD17B6/CYP46A1/DKK3/DGAT2/CYP2W1/DHRS9/RDH8/AKR1B1/ESR1/CYP26A1/CYP2D6/LHB/IL4I1/HSD17B1/SULT1E1/BMP5/CLCN2/TTR/SPP1/EGR1/LRAT/AKR1D1/BMP2/SRD5A3/HSD17B3/STARD3/HSD17B7/PDGFRA/RDH5/EDNRB/CYP1B1/CYP2C9/CYP2C8/RDH16/RDH12/CYP11A1/CYP1A1/CYP1A2/SRD5A1/UGT2B4/CYP3A4/CYP3A7/TIPARP/PLB1/SHH/SGPL1/DHRS13/SDR9C7/CEL/STAT5B/ALDH1A3/DGAT1/CACNA1H/ADH1B/UGT2B15/BCO2/UGT2B17/ADH4/AKR1C4/HSD3B1/AKR1B15/CYP21…	65	0.460993
GO:0051412	BP	GO:0051412	response to corticosterone	12/6492	17/18903	0.00249944	0.0246872	0.0186031	MAOB/CCND1/FOXO3/FOSB/NTRK3/AVPR1A/FOS/NPAS4/FOSL1/TH/HSD3B1/NEFL	12	0.705882
GO:0055119	BP	GO:0055119	relaxation of cardiac muscle	12/6492	17/18903	0.00249944	0.0246872	0.0186031	ATP1A2/PDE4D/RGS2/HRC/P2RX4/PDE5A/CAMK2D/GSN/SLC8A1/PDE4B/PLN/GSTM2	12	0.705882
GO:0072189	BP	GO:0072189	ureter development	12/6492	17/18903	0.00249944	0.0246872	0.0186031	SOX8/PAX2/FOXF1/GATA3/TBX18/SOX9/SIX1/OSR1/NFIA/SHH/SOX17/LHX1	12	0.705882
GO:0090231	BP	GO:0090231	regulation of spindle checkpoint	14/6492	21/18903	0.00251266	0.0246872	0.0186031	MAD1L1/NDC80/BIRC5/DUSP1/XRCC3/CCNB1/CDCA8/INCENP/MAD2L1/PRAP1/CDT1/GEN1/AURKB/LCMT1	14	0.666667
GO:0090266	BP	GO:0090266	regulation of mitotic cell cycle spindle assembly checkpoint	14/6492	21/18903	0.00251266	0.0246872	0.0186031	MAD1L1/NDC80/BIRC5/DUSP1/XRCC3/CCNB1/CDCA8/INCENP/MAD2L1/PRAP1/CDT1/GEN1/AURKB/LCMT1	14	0.666667
GO:1903504	BP	GO:1903504	regulation of mitotic spindle checkpoint	14/6492	21/18903	0.00251266	0.0246872	0.0186031	MAD1L1/NDC80/BIRC5/DUSP1/XRCC3/CCNB1/CDCA8/INCENP/MAD2L1/PRAP1/CDT1/GEN1/AURKB/LCMT1	14	0.666667
GO:0048771	BP	GO:0048771	tissue remodeling	80/6492	179/18903	0.00251983	0.0246872	0.0186031	WNT16/PDK4/SYT7/BAK1/TIE1/CLDN18/ROCK1/FGF10/TFRC/MEF2C/SNX10/BAX/MMP2/P2RX7/EFNA2/LRP5L/RASSF2/ACP5/SFRP1/CAV1/FGF8/NFKB1/IL2/MDK/TCIRG1/IL23A/HRG/ACVR2B/IL1A/IGFBP5/LEPR/TNFAIP3/SPP1/TGFB3/TNFSF11/LIF/TPH1/NOTCH2/ROCK2/CRB1/HTR1B/MDM2/GPR55/IL6/ACVRL1/P3H4/EPHA2/RSPO3/EDNRA/ADAM8/UBASH3B/PRKCA/PPARGC1B/MMP14/CBS/PTH1R/DDR2/IHH/HAND2/TNFRSF11B/NOS3/CTHRC1/DCSTAMP/ATP7A/GREM1/AXL/LTBP3/ADRB2/S1PR…	80	0.446927
GO:0051180	BP	GO:0051180	vitamin transport	26/6492	47/18903	0.00252217	0.0246872	0.0186031	SLC2A3/SCARB1/SLC46A1/LRP2/SLC52A3/CUBN/FOLR1/SLC19A2/APOA1/SLC25A19/RTBDN/TCN1/SLC2A8/TTPA/STRA6/SLC5A6/GC/SLC2A6/SLC2A2/FOLR2/AMN/SLC23A1/SLC19A1/SLC35F3/SLC52A2/SLC23A3	26	0.553191
GO:0060216	BP	GO:0060216	definitive hemopoiesis	13/6492	19/18903	0.00253854	0.0246872	0.0186031	CBFB/TGFBR3/GATA1/CDK5RAP3/KMT2A/HOXB3/TEK/MEIS1/ZFP36L2/HIPK1/ZFPM1/HOXB4/MFAP5	13	0.684211
GO:0061298	BP	GO:0061298	retina vasculature development in camera-type eye	13/6492	19/18903	0.00253854	0.0246872	0.0186031	LRP5L/LAMA1/ACVR2B/RHOJ/PDGFRA/CYP1B1/ACVRL1/ROM1/VSTM4/CLIC4/FZD4/ARHGEF15/BMPR2	13	0.684211
GO:0090670	BP	GO:0090670	RNA localization to Cajal body	13/6492	19/18903	0.00253854	0.0246872	0.0186031	DKC1/WRAP53/NAF1/CCT6A/CCT5/CCT8/CCT3/CCT2/EXOSC10/DCP2/RUVBL1/NOP10/RUVBL2	13	0.684211
GO:0090671	BP	GO:0090671	telomerase RNA localization to Cajal body	13/6492	19/18903	0.00253854	0.0246872	0.0186031	DKC1/WRAP53/NAF1/CCT6A/CCT5/CCT8/CCT3/CCT2/EXOSC10/DCP2/RUVBL1/NOP10/RUVBL2	13	0.684211
GO:0090672	BP	GO:0090672	telomerase RNA localization	13/6492	19/18903	0.00253854	0.0246872	0.0186031	DKC1/WRAP53/NAF1/CCT6A/CCT5/CCT8/CCT3/CCT2/EXOSC10/DCP2/RUVBL1/NOP10/RUVBL2	13	0.684211
GO:0090685	BP	GO:0090685	RNA localization to nucleus	13/6492	19/18903	0.00253854	0.0246872	0.0186031	DKC1/WRAP53/NAF1/CCT6A/CCT5/CCT8/CCT3/CCT2/EXOSC10/DCP2/RUVBL1/NOP10/RUVBL2	13	0.684211
GO:1901978	BP	GO:1901978	positive regulation of cell cycle checkpoint	13/6492	19/18903	0.00253854	0.0246872	0.0186031	MAD1L1/NDC80/BIRC5/TELO2/TTI1/PROX1/XRCC3/CDCA8/INCENP/MAD2L1/PBK/GEN1/AURKB	13	0.684211
GO:2001234	BP	GO:2001234	negative regulation of apoptotic signaling pathway	101/6492	233/18903	0.00254161	0.0246872	0.0186031	KDM1A/CX3CL1/MAPK8IP2/PLAUR/BRCA1/ZMYND11/BID/IGF1/HGF/GCLM/BAK1/TMEM161A/FGF10/MNT/NLE1/PTGS2/ENO1/BAX/SIRT1/HMOX1/MMP9/GATA1/MAZ/EYA1/PIH1D1/CXCL12/UNC5B/PPIF/WFS1/SOD2/BMP5/EYA4/NME5/IL1A/NFE2L2/TXNDC12/TNFAIP3/HELLS/CLU/MAPK8IP1/SNAI1/IFI6/BCL2L2/EPO/FIGNL1/TPT1/FAIM2/MDM2/YAP1/THBS1/COL2A1/PDX1/MCL1/ACKR3/SFRP2/ITPRIP/HYOU1/SLC25A4/NR4A2/MPV17L/CREB3L1/PINK1/LMNA/HMGB2/TERT/CSF2/NOS3/DDIAS/V…	101	0.433476
GO:2000242	BP	GO:2000242	negative regulation of reproductive process	38/6492	75/18903	0.0025779	0.0250022	0.0188405	IGF1/RPS6KA2/TRIP13/EPPIN/AMH/PTGDS/FBXO5/TTK/IL1A/DUSP1/PAEP/PRDX4/SEMG2/SNAI1/SEMG1/LIF/RGN/SERPINF1/NR5A1/DMRT1/SULF1/HORMAD1/ZP1/FBXO43/KIT/NPR2/HPGDS/ZFPM2/BCL2L1/OVOL1/GPR149/CALR/WT1/ZP3/ASTL/SYCP2/ADA/SPINK13	38	0.506667
GO:2000134	BP	GO:2000134	negative regulation of G1/S transition of mitotic cell cycle	43/6492	87/18903	0.00259113	0.0250928	0.0189088	FHL1/GTSE1/JADE1/RBL1/FBXO31/RBL2/CASP2/EZH2/CCL2/CCND1/PKD2/INHBA/CDK2/CDKN1A/APC/MDM2/KLF4/PML/CTDSPL/NACC2/ATM/DACT1/PRAP1/E2F7/WEE1/CDK2AP2/FAM107A/RFWD3/CRADD/TRIAP1/BCL2/PTEN/PLK3/PIDD1/CACNB4/CHEK2/MUC1/PLK5/DCUN1D3/KANK2/GJC2/GIGYF2/PRKDC	43	0.494253
GO:0001837	BP	GO:0001837	epithelial to mesenchymal transition	76/6492	169/18903	0.00260261	0.0251663	0.0189642	WNT16/IGF1/WWTR1/PHLDB1/HGF/CUL7/EPHA3/ROCK1/TGFBR3/LRP6/TCOF1/FERMT2/CLASP1/FGFR1/TBX5/FAM83D/SMAD7/RGCC/SFRP1/HPN/WNT2/EZH2/AKNA/GATA3/FGF8/MDK/BMP5/EPHA4/MAD2L2/TGFB3/GLIPR2/SNAI1/SOX9/POLR1B/FOXA2/BMP2/OLFM1/TRIM28/LOXL2/ROCK2/HEY2/SPRY2/IL6/NKX2-1/DAB2IP/SDCBP/TGFB1I1/ZNF750/SMAD4/ADAM15/IL17RD/PHLDB2/SFRP2/CRB2/HMGA2/PDCD4/EDNRA/MSX1/KBTBD8/TGFBR2/SPRY1/TBX20/HEY1/SPRED1/TMEM100/GREM1/VASN/…	76	0.449704
GO:0007249	BP	GO:0007249	I-kappaB kinase/NF-kappaB signaling	122/6492	288/18903	0.00265417	0.0256266	0.019311	MAP3K14/CX3CL1/FYN/PPP5C/ZMYND11/ATP2C1/TAB2/TRAF1/SPHK2/ROCK1/BCL3/RORA/TFRC/TRAF4/MID2/TRAF5/ERC1/FKBP1A/ESR1/TMEM101/TREM2/SIRT1/ABL1/HMOX1/NFKBIA/TRADD/PYCARD/RIPK2/NFKBIB/LTBR/GAPDH/GOLT1B/ECT2/TFG/IL1A/STAT1/ASH1L/WLS/GPR89A/TNFAIP3/TNFSF11/TRIM25/PRDX4/WDR83/UNC5CL/RBCK1/IRF3/AVPR2/TRAF2/TICAM1/AJUBA/BST2/EDA2R/ROCK2/HTR2B/EDNRB/DAB2IP/TLR4/TLR2/MAPKBP1/PELI2/BCL10/ECM1/IRAK1BP1/EDNRA/ANGP…	122	0.423611
GO:0086002	BP	GO:0086002	cardiac muscle cell action potential involved in contraction	29/6492	54/18903	0.00266488	0.0256725	0.0193456	DSG2/KCNH2/PKP2/KCNN2/SNTA1/SCN1B/CAV1/NUP155/KCNJ8/KCNA5/TRPM4/DSC2/BIN1/ANK2/SCN2B/CACNA1C/KCNE4/GPD1L/CACNA2D1/RNF207/KCNJ3/CACNB2/SCN3B/KCND3/SCN4B/GJC1/CTNNA3/FLNA/RYR2	29	0.537037
GO:0046503	BP	GO:0046503	glycerolipid catabolic process	35/6492	68/18903	0.00266686	0.0256725	0.0193456	LYPLA2/SCARB1/MGLL/PNPLA3/ABHD12/LIPG/GDPD3/PLA2G15/PLA2G4C/FGF21/APOA5/APOC3/AADAC/PLA2G4A/FAAH/APOA1/GPCPD1/PLA2G5/LDLR/APOC1/PNPLA7/SMPD4/ENPP2/PLA2G7/GDPD1/APOA2/PLB1/ENPP6/DAGLB/LIPC/PNPLA1/PLCB1/LIPI/APOC2/GPIHBP1	35	0.514706
GO:0045766	BP	GO:0045766	positive regulation of angiogenesis	83/6492	187/18903	0.00268427	0.0257634	0.0194141	HSPB6/BRCA1/HGF/TIE1/PKM/MYDGF/SIRT6/RAPGEF3/CMA1/SIRT1/ABL1/HMOX1/TJP1/C5/RLN2/GAB1/MDK/SASH1/NR2E1/SMOC2/HYAL1/IL1A/NFE2L2/AKT3/F3/PGF/TEK/TNN/CXCR4/PTGIS/C3/RRAS/KDR/ADM2/PAK4/RAMP2/ANGPTL3/CHI3L1/BTG1/ETS1/KLF4/THBS1/CYP1B1/EMILIN1/FGF2/ACVRL1/GATA6/ECM1/RHOB/SFRP2/ADAM12/HMGA2/ITGB1/PRKCA/FGF18/HK2/ITGA5/EMC10/JAK1/HIPK1/TGFBR2/TLR3/TERT/BMPER/NOS3/PRKCB/GREM1/STIM1/CX3CR1/STAT3/CYSLTR1/VEGF…	83	0.44385
GO:1904018	BP	GO:1904018	positive regulation of vasculature development	83/6492	187/18903	0.00268427	0.0257634	0.0194141	HSPB6/BRCA1/HGF/TIE1/PKM/MYDGF/SIRT6/RAPGEF3/CMA1/SIRT1/ABL1/HMOX1/TJP1/C5/RLN2/GAB1/MDK/SASH1/NR2E1/SMOC2/HYAL1/IL1A/NFE2L2/AKT3/F3/PGF/TEK/TNN/CXCR4/PTGIS/C3/RRAS/KDR/ADM2/PAK4/RAMP2/ANGPTL3/CHI3L1/BTG1/ETS1/KLF4/THBS1/CYP1B1/EMILIN1/FGF2/ACVRL1/GATA6/ECM1/RHOB/SFRP2/ADAM12/HMGA2/ITGB1/PRKCA/FGF18/HK2/ITGA5/EMC10/JAK1/HIPK1/TGFBR2/TLR3/TERT/BMPER/NOS3/PRKCB/GREM1/STIM1/CX3CR1/STAT3/CYSLTR1/VEGF…	83	0.44385
GO:0001894	BP	GO:0001894	tissue homeostasis	117/6492	275/18903	0.00268831	0.025764	0.0194145	PDK4/ABCC8/MKS1/WWTR1/VCL/CDH3/CLDN18/CNGB1/TFRC/PTGS2/ACTB/TP53INP2/SNX10/BAX/P2RX7/OAS1/LYZ/CST4/VSIG1/GATA1/ACP5/TJP1/RP1/COMP/LSR/HOXA13/CUBN/PBLD/TCIRG1/PRR4/IL17A/SRF/ITGB6/AKT3/KMT2A/TNFAIP3/SPP1/TNFSF11/BBS2/SOX9/KDR/ATP1B2/NXNL2/NAPSA/NPHP4/CRB1/P2RX4/LCA5/LAMC1/GPR55/IL6/TLR4/YAP1/SLC28A2/SLC39A8/COL2A1/RDH12/ABCA12/CRB2/ITGB1/ADAM8/LPCAT1/UBASH3B/ANGPT1/PRKCA/CXADR/JAM2/PPARGC1B/F11R/P…	117	0.425455
GO:0007584	BP	GO:0007584	response to nutrient	70/6492	154/18903	0.00270074	0.0258339	0.0194672	PDK2/GCLM/OTC/TFRC/PTGS2/NCOA1/CYP26A1/HMOX1/AHCY/LIPG/PHEX/SFRP1/CCND1/FOLR1/CYP27B1/SOD2/SRF/ARSB/BCHE/IL1A/STAT1/IGFBP2/KYNU/SPP1/DNMT3A/TRIM25/LRAT/CAT/TRIM24/RUNX2/FOXA2/EPO/MAP1B/RARA/POSTN/TSHB/BRIP1/PIM1/CYP1B1/ABCG5/PDX1/CYP1A1/PKLR/ABCG8/SFRP2/OGT/ALAD/CCL28/USF1/STC1/CBS/AGL/TGFBR2/TNFRSF11B/AQP3/FOLR2/SLC27A4/MN1/CXCL10/SLC6A19/A2M/TYMS/MTHFR/NQO1/PENK/SLC8A1/GAS6/NDOR1/KANK2/GPX1	70	0.454545
GO:0060135	BP	GO:0060135	maternal process involved in female pregnancy	32/6492	61/18903	0.00270359	0.0258339	0.0194672	ITGA3/PRDM1/DAZAP1/PTGS2/PGR/TMED2/ESR1/KLF1/CYP27B1/ASH1L/RGS2/SPP1/ADCY7/APOL2/LIF/PARP2/MEN1/DSG1/PAM/DEDD/STC1/TPPP3/AGRP/CBS/IHH/TCF23/CITED2/GJB2/AR/JUNB/EPOR/BMPR2	32	0.52459
GO:0002028	BP	GO:0002028	regulation of sodium ion transport	45/6492	92/18903	0.00270788	0.0258367	0.0194693	HECW1/CNTN1/ATP1A2/PRSS8/PKP2/ATP2B4/WNK1/NKAIN1/P2RX7/NKAIN4/SNTA1/DMPK/SCN1B/WNK4/ATP1B2/FGF13/GRP/P2RX4/FXYD6/SIK1/OSR1/CAMK2D/STOM/SCN2B/FXYD4/GPD1L/UTRN/CNKSR3/SPTBN4/FGF11/SLMAP/NOS3/SCN3B/NETO1/PCSK9/ADRB2/PRKCE/NETO2/SCN4B/PER1/SLC8A1/NKX2-5/STK39/DMD/FXYD1	45	0.48913
GO:0045777	BP	GO:0045777	positive regulation of blood pressure	21/6492	36/18903	0.00271434	0.0258602	0.019487	CYBA/WNK1/GLP1R/PDE4D/TACR1/ID2/ADRA1A/AVPR2/SPX/TPM1/ADORA1/AVPR1A/TAC3/DRD5/TACR3/ADRA1D/HSD11B2/OXTR/QRFP/ADH5/ADRA2B	21	0.583333
GO:2001259	BP	GO:2001259	positive regulation of cation channel activity	40/6492	80/18903	0.00275397	0.0261572	0.0197109	ABCC8/EHD3/GAL/CACNG4/ACTN2/TREM2/PPP3CB/CCL2/KCNA1/IFNG/PKD2/PPP3CC/EPHB2/STAC/ANK2/JPH2/AKAP6/EDNRA/CACNA2D1/RNF207/PINK1/IFNGR2/CDK5/CACNB2/STIM1/CACNB3/ADRB2/KCNK3/P2RY6/HAP1/AMIGO1/CACNB4/GALR2/LRRC26/STAC3/RELN/NLGN3/ARC/CALM1/GSTM2	40	0.5
GO:0060249	BP	GO:0060249	anatomical structure homeostasis	139/6492	333/18903	0.00275413	0.0261572	0.0197109	PDK4/ABCC8/CX3CL1/MKS1/WWTR1/VCL/CDH3/CLDN18/ATP2B3/CNGB1/TFRC/PTGS2/ACTB/TP53INP2/SNX10/BAX/P2RX7/OAS1/LYZ/TYRO3/CST4/VSIG1/GATA1/ACP5/SLC6A2/TJP1/RP1/CA2/CALB1/COMP/LSR/CAV1/HOXA13/CUBN/PBLD/P2RX1/TCIRG1/PRR4/IL17A/SRF/ITGB6/AKT3/KMT2A/SLC8A2/TNFAIP3/SPP1/TNFSF11/BBS2/SOX9/KDR/ATP1B2/NXNL2/NAPSA/NPHP4/CRB1/P2RX4/HTR1B/LCA5/LAMC1/GPR55/IL6/TLR4/YAP1/SLC28A2/CHRNA1/SLC39A8/COL2A1/RDH12/ABCA12/CRB…	139	0.417417
GO:0006022	BP	GO:0006022	aminoglycan metabolic process	62/6492	134/18903	0.00275765	0.0261572	0.0197109	HS3ST1/IDS/DCN/XYLT2/B4GALT7/CHPF2/HMMR/PDGFB/ITIH6/HAS3/XYLT1/CEMIP/HAS1/HYAL4/NFKB1/UST/HYAL1/B4GALT4/CHST3/ITIH5/TNFAIP6/CHPF/ST3GAL3/IDUA/CLN6/CHSY1/CHI3L1/CHIT1/LYVE1/CHIA/STAB2/EDNRB/FGF2/LYG1/CSGALNACT1/B3GAT3/EDNRA/ITIH2/HS3ST3A1/ANGPT1/PXYLP1/B4GALT5/PGLYRP2/PGLYRP4/NDST3/CSGALNACT2/GUSB/GLB1/HS6ST2/CHST11/DSEL/HPSE2/NDNF/B4GAT1/GAL3ST3/B3GALT6/B3GNT4/B3GNT3/CHST13/BGN/CHST6/LYG2	62	0.462687
GO:0001764	BP	GO:0001764	neuron migration	79/6492	177/18903	0.00278974	0.0264229	0.0199111	ARX/ITGA3/CX3CL1/PAFAH1B1/FYN/CAMK2B/NTN1/CTNNA2/ASPM/NEO1/CAMK2A/SEMA3A/WDR62/FGFR1/PCM1/MEF2C/BAX/NRCAM/TYRO3/FBXO31/LHX6/GATA3/CXCL12/MDK/CEP85L/PHACTR1/SRF/PLXNA1/NRP2/TNN/CXCR4/FEZF1/FGF13/PLXNA3/MAP1B/DCLK1/NKX2-1/DAB2IP/KIAA0319/KIF20B/NTRK3/GFRA3/GNRH1/VAX1/KIRREL3/GPM6A/POU4F1/IGSF10/NR4A2/NTNG1/TRIM46/NKX6-1/TBX20/CDK5/FAT3/NDEL1/AXL/DDIT4/STAT3/SEMA3E/CDK5R2/NDNF/FBXO45/FOXG1/CDK5R1/UN…	79	0.446328
GO:0042551	BP	GO:0042551	neuron maturation	25/6492	45/18903	0.00280543	0.0265327	0.0199938	KDM1A/CX3CL1/MYOC/EPHA8/SCARF1/NRCAM/PICK1/VSX1/C3/EDNRB/EDNRA/NR4A2/LGI4/KCNB1/B4GALT5/SPTBN4/FEV/MECP2/RAC3/BCL2/RND1/CNTNAP2/CNTN2/AGRN/LRRK2	25	0.555556
GO:0046939	BP	GO:0046939	nucleotide phosphorylation	49/6492	102/18903	0.00288642	0.0272587	0.0205409	NME2/IGF1/PNKP/PKM/HDAC4/ENO1/SIRT6/P2RX7/PGK1/HTR2A/NME4/GAPDHS/OGDH/PRKAG2/GIT1/GALK1/IFNG/GAPDH/TPI1/NME5/CBFA2T3/CMPK2/ALDOB/NCOR1/RPTOR/FOXK2/PKLR/OGT/PFKM/HKDC1/HK1/PFKFB1/ADPGK/HK2/SLC2A6/HK3/PRKAA2/AK4/DDIT4/STAT3/NME6/BPGM/DHTKD1/NME9/PPARA/NME1/EIF6/ACTN3/INS	49	0.480392
GO:0000281	BP	GO:0000281	mitotic cytokinesis	42/6492	85/18903	0.00290628	0.0273664	0.0206221	ANLN/CUL7/ROCK1/BIRC5/KIF4A/UNC119/KIF20A/ECT2/RTKN/CENPA/SPTBN1/CHMP3/STMN1/CIT/SNX9/ROCK2/CDCA8/APC/ESPL1/CKAP2/NUSAP1/KIF23/CEP55/KIF20B/JTB/RHOB/ANKRD53/CHMP7/INCENP/TRIM36/MITD1/RACGAP1/CHMP4C/PLK1/DCDC1/CFL1/SNX18/AURKB/EFHC2/NUP62/KIF4B/CHMP1B	42	0.494118
GO:0021954	BP	GO:0021954	central nervous system neuron development	42/6492	85/18903	0.00290628	0.0273664	0.0206221	ARX/MYCBP2/PAFAH1B1/GLI2/SCN1B/OGDH/LHX6/NR2E1/PLXNA1/EPHA4/NRP2/PLXNA3/DCLK1/EPHB2/SLIT2/NFIB/NR4A2/EPHB1/B4GALT5/BTG2/ARHGAP35/SPTBN4/CHRNB2/DRAXIN/CDK5/ATP7A/HPRT1/NDEL1/GBX2/RAC3/SEMA3E/DCLK2/PTEN/NDNF/FBXO45/FOXG1/NHLH2/CNTN2/MAPT/DCC/ADARB1/PLXNA4	42	0.494118
GO:0014013	BP	GO:0014013	regulation of gliogenesis	51/6492	107/18903	0.00295066	0.0277439	0.0209065	SOX8/ABCC8/NTN1/TP73/LRP2/TREM2/E2F1/MAG/EZH2/PITX3/ASPA/MDK/NR2E1/HES1/ID2/DLX2/CXCR4/EGR2/NKX2-2/BMP2/LIF/RNF112/LDLR/LIN28A/IL6ST/IL6/BIN1/IL33/TLR2/ZNF365/NTRK3/CERS2/DLX1/DAAM2/TTBK1/TENM4/IL34/SKI/NKX6-1/SHH/SPINT1/MECP2/ID4/SOX11/F2/PLAG1/ASCL2/HES5/GJC2/LYN/ZNF488	51	0.476636
GO:0003382	BP	GO:0003382	epithelial cell morphogenesis	20/6492	34/18903	0.0029757	0.0278983	0.0210228	ROCK1/GRHL2/VSIG1/SIPA1L3/MET/HOXA13/PLOD3/ARHGEF26/PALLD/FRMD6/ST14/STC1/IHH/CLDN3/SPINT2/AR/COL22A1/CLIC4/HEG1/COL18A1	20	0.588235
GO:0009649	BP	GO:0009649	entrainment of circadian clock	20/6492	34/18903	0.0029757	0.0278983	0.0210228	FBXL3/CRY1/USP2/PER3/ID2/CRY2/PER2/BHLHE40/FBXL8/PML/SIK1/FBXL17/GNAQ/NR2F6/PPP1CA/PER1/ATOH7/FBXL6/FBXL22/PPP1CB	20	0.588235
GO:0072577	BP	GO:0072577	endothelial cell apoptotic process	34/6492	66/18903	0.00299193	0.0280098	0.0211069	ABL1/CD40LG/RGCC/FGF21/GATA3/CCL2/NFE2L2/CD160/TNFAIP3/FOXO3/TEK/KDR/PAK4/RAMP2/DAB2IP/THBS1/PDCD4/ANGPT1/HIPK1/TERT/GPER1/IL13/FGG/FGA/FGB/SCG2/NDNF/CD248/ANO6/CDH5/GAS6/BMPR2/HLA-G/ECSCR	34	0.515152
GO:0006029	BP	GO:0006029	proteoglycan metabolic process	44/6492	90/18903	0.0030358	0.0283385	0.0213546	HS3ST1/IDS/DCN/XYLT2/IGF1/B4GALT7/CHPF2/COL11A1/XYLT1/HYAL4/UST/B3GAT2/HYAL1/CHST3/CHPF/CHST8/BMP2/IDUA/CHSY1/ADAMTS7/SULF1/BMPR1B/COL2A1/CSGALNACT1/B3GAT3/ADAMTS12/HS3ST3A1/PXYLP1/IHH/NDST3/CSGALNACT2/GUSB/CYTL1/HS6ST2/CANT1/CHST11/DSEL/NDNF/GAL3ST3/B3GALT6/CHST13/BGN/BMPR2/MUSTN1	44	0.488889
GO:0055006	BP	GO:0055006	cardiac cell development	44/6492	90/18903	0.0030358	0.0283385	0.0213546	IGF1/MEF2A/TGFBR3/ACTN2/TBX5/ASB2/BMPR1A/BVES/SRF/TBX18/FOXP1/RGS2/PROX1/ADRA1A/INHBA/PARP2/MYH11/MYO18B/FHOD3/PDGFRA/HEY2/ALPK3/SMAD4/PDCD4/AKAP6/SORBS2/CXADR/ACTC1/G6PD/LMNA/SGCB/PDLIM5/SPRY1/PI16/SHOX2/CDK1/SGCD/AKAP13/TCAP/SLC8A1/NKX2-5/NEB/PPARA/ALPK2	44	0.488889
GO:0070304	BP	GO:0070304	positive regulation of stress-activated protein kinase signaling cascade	61/6492	132/18903	0.00307277	0.0286423	0.0215835	WNT16/MAPK8IP2/TRAF1/SEMA3A/TRAF4/TRAF5/GADD45B/BIRC7/RASSF2/PYCARD/RIPK2/LTBR/IL26/TPD52L1/SASH1/DUSP22/PDCD10/IL1A/GADD45A/SLAMF1/MMP8/TNFSF11/MAPK8IP1/UNC5CL/BMP2/PRMT1/TRAF2/GADD45G/MAP3K10/EDA2R/ANKRD6/DAB2IP/TLR4/SDCBP/MAPKBP1/MFHAS1/DIXDC1/TNIK/WNT7A/FZD7/XDH/FGF19/DUSP19/HAND2/TLR3/RELL2/IGFBP6/MAP4K2/CCL19/SH3RF3/HRAS/SPHK1/MTURN/RELL1/PLCB1/CARD9/STK39/MAP3K3/PJA2/AGER/LYN	61	0.462121
GO:0045687	BP	GO:0045687	positive regulation of glial cell differentiation	24/6492	43/18903	0.00311864	0.029028	0.0218742	TP73/MAG/ASPA/MDK/HES1/ID2/CXCR4/EGR2/NKX2-2/BMP2/LIF/RNF112/IL6ST/BIN1/IL33/TLR2/ZNF365/TTBK1/TENM4/IL34/NKX6-1/SHH/SPINT1/ZNF488	24	0.55814
GO:0010975	BP	GO:0010975	regulation of neuron projection development	181/6492	446/18903	0.00317871	0.0295446	0.0222634	SEMA3F/HECW1/FKBP4/KDM1A/MYCBP2/ITGA3/CX3CL1/PAFAH1B1/SS18L2/SEMA3G/FYN/CNTN1/HGF/VIM/LRRC7/CDH1/RTN4R/CUL7/EPHA3/HSPA5/CAMK2B/DGKG/LTK/NTN1/CTNNA2/SCARF1/SEMA3A/PLXNA2/RAB21/ULK2/NRCAM/SEMA4G/ABL1/NFATC4/ZDHHC15/FBXO31/EEF2K/SFRP1/SF3A2/PTPRS/MEGF8/MAG/SCN1B/EZH2/LIMK1/KANK1/NCS1/SETX/GATA3/CXCL12/DKK1/WNT3/RND2/PMP22/MDK/UST/BMP5/NR2E1/PTK7/SRF/ARSB/DPYSL3/HES1/PLXNA1/DGUOK/TLX2/NFE2L2/EPHA4/RA…	181	0.40583
GO:0006165	BP	GO:0006165	nucleoside diphosphate phosphorylation	48/6492	100/18903	0.00323175	0.0299516	0.0225701	NME2/IGF1/PKM/HDAC4/ENO1/SIRT6/P2RX7/PGK1/HTR2A/NME4/GAPDHS/OGDH/PRKAG2/GIT1/GALK1/IFNG/GAPDH/TPI1/NME5/CBFA2T3/CMPK2/ALDOB/NCOR1/RPTOR/FOXK2/PKLR/OGT/PFKM/HKDC1/HK1/PFKFB1/ADPGK/HK2/SLC2A6/HK3/PRKAA2/AK4/DDIT4/STAT3/NME6/BPGM/DHTKD1/NME9/PPARA/NME1/EIF6/ACTN3/INS	48	0.48
GO:1901992	BP	GO:1901992	positive regulation of mitotic cell cycle phase transition	48/6492	100/18903	0.00323175	0.0299516	0.0225701	KMT2E/CUL3/FGF10/CDC6/CDC7/CDC25B/RGCC/CCND1/FBXO5/HYAL1/CCND2/CPSF3/STIL/DLGAP5/HSPA2/KCNA5/CCNB1/ANXA1/CDK4/ESPL1/MDM2/CYP1A1/ANAPC11/RPTOR/DTL/CDCA5/ADAM17/ADAMTS1/LSM11/SASS6/CDC25C/DBF4B/DDR2/CDC25A/TERT/PRAP1/CDT1/MECP2/CDK1/RRM2/MTBP/UBE2C/RCC2/PLCB1/CDK10/PBX1/TFDP1/DDX3X	48	0.48
GO:0048710	BP	GO:0048710	regulation of astrocyte differentiation	19/6492	32/18903	0.0032532	0.0300214	0.0226227	TREM2/MAG/NR2E1/HES1/ID2/EPHA4/BMP2/LIF/LDLR/IL6ST/IL6/BIN1/NTRK3/TTBK1/SHH/ID4/F2/CNTN2/HES5	19	0.59375
GO:1901889	BP	GO:1901889	negative regulation of cell junction assembly	19/6492	32/18903	0.0032532	0.0300214	0.0226227	ARHGAP6/ROCK1/CBLN1/DKK1/CORO1C/DUSP22/ROCK2/EPHA7/TLR2/THBS1/ACVRL1/PHLDB2/MMP14/DLC1/FAM107A/PTEN/RCC2/APOD/SRC	19	0.59375
GO:1990776	BP	GO:1990776	response to angiotensin	19/6492	32/18903	0.0032532	0.0300214	0.0226227	CYBA/ROCK1/CAMK2A/PTGS2/ACTN2/CDC6/CA2/CAV1/NFKB1/NFE2L2/INHBA/MAS1/ROCK2/BRIP1/AGTR1/DDR2/AGTRAP/SLC30A10/SRC	19	0.59375
GO:0071466	BP	GO:0071466	cellular response to xenobiotic stimulus	81/6492	183/18903	0.00328047	0.0302299	0.0227798	NOS2/DPEP1/CYP46A1/HSPA5/KCNH2/PPP1R12A/AHRR/GSTO2/RORA/TFRC/CYP2W1/MEF2C/ABCB1/FMO2/CYP26A1/CYP2D6/SLC10A1/HNF4A/E2F1/FGF21/RECQL5/EFTUD2/CD69/SLCO1B3/BCHE/UMPS/AADAC/NFE2L2/CXCR4/ABCC4/WNK4/APOBEC3A/PCNA/SLCO1B1/CYP2J2/HTR1B/NUDT15/MYC/CYP1B1/CYP2C9/CYP2C8/AOX1/CYP1A1/CYP1A2/EPHX1/NR1I2/NCEH1/CRHBP/ANKRD1/CYP2U1/CBR1/VAV2/CYP3A4/CYP3A7/PRKAA2/AIM2/TLR3/MCM7/ACSM1/LPO/NAT1/CES3/CES2/SULT1B1/PPM1…	81	0.442623
GO:0016052	BP	GO:0016052	carbohydrate catabolic process	70/6492	155/18903	0.00329263	0.0302557	0.0227993	IGF1/DERA/PKM/HDAC4/PYGM/ENO1/SIRT6/P2RX7/XYLB/MIOX/PYGB/PGK1/HTR2A/DHDH/GAPDHS/OGDH/PRKAG2/GIT1/GALK1/IFNG/GAPDH/TPI1/SLC25A12/LCT/GALE/TREH/CBFA2T3/ENOSF1/CHIT1/CHIA/ALDOB/GABARAPL1/NCOR1/RPTOR/FOXK2/PGD/PKLR/GALM/OGT/IDNK/PFKM/HKDC1/HK1/PHKG2/PFKFB1/ADPGK/HK2/SLC2A6/HK3/PRKAA2/AGL/NUDT5/DDIT4/GLYCTK/STAT3/GUSB/GLB1/RBKS/GAA/BPGM/PPP1CA/PPP1R3B/FUT7/DHTKD1/PPARA/NEU1/EIF6/ACTN3/INS/MGAM	70	0.451613
GO:1905039	BP	GO:1905039	carboxylic acid transmembrane transport	70/6492	155/18903	0.00329263	0.0302557	0.0227993	SLC25A13/SLC6A13/SLC6A7/SLC38A5/SLC11A1/ATP1A2/SLC7A9/MPC1/SLC46A1/SLC1A3/LRP2/ABCB1/SLC25A1/SLC16A8/SLC25A14/SLC25A15/SLC38A7/SLC7A6/SLC17A7/SLC1A6/FOLR1/SLC6A12/SLC38A1/SLC16A10/SLC25A12/SLC1A4/RGS2/SLC16A7/SLC25A2/SLC6A6/SLC6A11/PER2/SLC38A2/THBS1/SLC5A6/SLC3A1/SLC38A4/SLC38A6/SLC13A5/SLC16A3/SLC16A2/SLC43A1/ITGB1/SLC7A11/SFXN2/MFSD12/SLC6A20/SFXN1/SLC7A3/FOLR2/SLC3A2/SLC23A1/ARL6IP1/LRRC8D/AB…	70	0.451613
GO:0044282	BP	GO:0044282	small molecule catabolic process	158/6492	385/18903	0.00336073	0.0308377	0.0232379	ENPP4/NOS2/AASS/DPEP1/DERA/HSD17B6/OTC/CYP46A1/ATP2B4/OAT/PKM/INPP5A/SCARB1/CYP2W1/SCARF1/ENO1/ACAT1/ACACB/SYNJ2/ARG2/HAL/XYLB/CYP26A1/GCAT/MIOX/APOBEC3H/SLC25A17/PCK2/HAO1/AHCY/ACOT8/PGK1/PLA2G15/MLYCD/CRYM/QPRT/DHDH/IL4I1/BCAT2/NUDT1/ASPA/GALK1/SULT1E1/INPP4B/AADAT/CYP27B1/ALDH2/TPI1/HGD/SLC25A12/KYNU/KMO/ACADM/GALE/AKR1A1/FAAH/ALDH6A1/ACAT2/OCRL/AKR1D1/APOBEC2/SRD5A3/MPST/APOBEC3A/GAD1/CDO1/ID…	158	0.41039
GO:0031644	BP	GO:0031644	regulation of nervous system process	66/6492	145/18903	0.00336663	0.0308481	0.0232457	HGF/TYMP/HOMER3/PRKCZ/MGLL/CACNG4/CST7/RIMS1/SLC8A3/CELF4/CBLN1/DMPK/GRIN2D/MAG/STX1A/CTSC/IL1A/SLC25A12/OPRD1/DLGAP3/SLC8A2/EGR2/MYRF/OPRL1/KLK8/WASF3/ROCK2/LPIN1/SPX/MTNR1B/EDNRB/IL33/IGSF11/TMEM108/VIP/HTR2C/PARD3/TENM4/JAM2/WNT7A/ADORA1/NOS3/AVPR1A/TMEM100/NETO1/SCN11A/ADRB2/NLGN1/NPTX1/TPPP/PTEN/CNIH2/GPR171/GRIN1/GPR35/NRXN1/F2R/SHISA6/LRRK2/RELN/NLGN3/SRC/DLGAP2/ZNF488/S1PR2/GRIN2B	66	0.455172
GO:0007266	BP	GO:0007266	Rho protein signal transduction	64/6492	140/18903	0.00339384	0.031032	0.0233843	ITGA3/RALBP1/MYOC/CUL3/RTN4R/ARHGAP6/RASGRF1/NTN1/ROCK1/P2RY10/OPHN1/ABL1/ARHGAP5/ARHGEF10/MET/LIMK1/KANK1/APOC3/KCTD10/BCL6/RTKN/STMN1/APOA1/CTNNAL1/ADRA1A/RHOJ/STARD8/STARD13/ROCK2/GPR55/ARRB1/CNKSR1/RHOB/GPR17/AGTR1/CDC42EP2/ITGB1/ADRA2A/EPS8/F11R/ARHGAP35/RACGAP1/CDC42EP3/ARHGEF3/DLC1/ABCA1/AKAP13/PLEKHG5/CFL1/RHOD/HEG1/ABRA/KCTD13/ARHGAP1/EPS8L2/GPR35/F2R/P2RY8/ARHGEF12/KANK2/LPAR1/EPS8L3/SY…	64	0.457143
GO:0008347	BP	GO:0008347	glial cell migration	30/6492	57/18903	0.0033963	0.031032	0.0233843	CX3CL1/PAFAH1B1/NTN1/TREM2/CCL2/NR2E1/EPHA4/MBOAT7/RRAS/PTPRB/ATP1B2/P2RX4/DAB2IP/CERS2/APCDD1/LRP8/MMP14/CDK5/CX3CR1/P2RY12/GPR183/P2RY1/CDK5R2/CSPG4/FOXG1/CDK5R1/SCRIB/NDN/RELN/SRGAP2	30	0.526316
GO:0032874	BP	GO:0032874	positive regulation of stress-activated MAPK cascade	60/6492	130/18903	0.00342384	0.0312395	0.0235406	WNT16/MAPK8IP2/TRAF1/SEMA3A/TRAF4/TRAF5/GADD45B/BIRC7/RASSF2/PYCARD/RIPK2/LTBR/IL26/TPD52L1/SASH1/DUSP22/PDCD10/IL1A/GADD45A/SLAMF1/MMP8/TNFSF11/MAPK8IP1/UNC5CL/BMP2/PRMT1/TRAF2/GADD45G/MAP3K10/EDA2R/ANKRD6/DAB2IP/TLR4/SDCBP/MAPKBP1/MFHAS1/DIXDC1/TNIK/WNT7A/FZD7/XDH/FGF19/DUSP19/HAND2/TLR3/RELL2/IGFBP6/MAP4K2/CCL19/SH3RF3/HRAS/SPHK1/MTURN/RELL1/PLCB1/CARD9/STK39/MAP3K3/PJA2/AGER	60	0.461538
GO:0010719	BP	GO:0010719	negative regulation of epithelial to mesenchymal transition	23/6492	41/18903	0.00346435	0.0315202	0.0237521	TBX5/SMAD7/SFRP1/HPN/GATA3/BMP5/EPHA4/MAD2L2/FOXA2/SPRY2/NKX2-1/DAB2IP/ZNF750/IL17RD/SFRP2/SPRY1/SPRED1/VASN/LDLRAD4/EFNA1/PTEN/SPRED3/DACT3	23	0.560976
GO:0120178	BP	GO:0120178	steroid hormone biosynthetic process	23/6492	41/18903	0.00346435	0.0315202	0.0237521	HSD17B6/DKK3/RDH8/AKR1B1/LHB/HSD17B1/BMP5/CLCN2/EGR1/BMP2/SRD5A3/HSD17B3/STARD3/HSD17B7/CYP11A1/SRD5A1/DHCR7/CACNA1H/HSD3B1/AKR1B15/CYP21A2/SRD5A2/DHRS11	23	0.560976
GO:0006835	BP	GO:0006835	dicarboxylic acid transport	45/6492	93/18903	0.00352296	0.0319188	0.0240525	SLC25A13/ATP1A2/SLC46A1/SLC1A3/LRP2/P2RX7/SLC26A3/HRH3/SLC25A14/SLC38A7/SLC17A7/SLC1A6/APBA1/FOLR1/RAB3GAP1/SLC25A12/SLC1A4/KMO/SLC19A2/GIPC1/PER2/SLC38A2/STXBP1/SLC3A1/SLC13A5/SLC26A1/SNCA/ITGB1/SLC7A11/ADORA1/FOLR2/AVPR1A/ARL6IP1/SLC26A5/TRH/LRRC8D/SLC19A1/SLC25A30/SLC25A22/KCNJ10/CLN8/SLC25A21/SLC25A10/GRM7/SLC26A6	45	0.483871
GO:0050886	BP	GO:0050886	endocrine process	45/6492	93/18903	0.00352296	0.0319188	0.0240525	CRY1/CYBA/GAL/RPS6KA2/TACR2/C1QTNF3/CMA1/PCSK5/CTSG/CTSZ/GATA3/TACR1/SPP1/CRY2/INHBA/INHA/WNK4/AVPR2/CGA/EDNRB/SMAD4/AGTR1/CORIN/CRHBP/CRH/INHBB/CPA3/UCN/NOS3/TRPV6/RAB8B/AVPR1A/GALR1/DRD5/KISS1/FZD4/HSD11B2/PTPN11/OXTR/F2R/HCAR2/FOXL2/SUCNR1/AQP1/FOXD1	45	0.483871
GO:2000106	BP	GO:2000106	regulation of leukocyte apoptotic process	45/6492	93/18903	0.00352296	0.0319188	0.0240525	KITLG/BCL3/ARG2/MEF2C/BAX/P2RX7/SIRT1/BIRC7/CXCL12/IL2/BCL6/FOXP1/CD274/IDO1/ANXA1/BLK/BCL10/ITPKB/ZC3H8/CDKN2A/SLC7A11/ADAM8/ADAM17/BCL2L11/TSC22D3/PIP/RAG1/AXL/FADD/EFNA1/GIMAP8/BCL2L1/BCL2/PTEN/CCL19/AURKB/CXCR2/HCAR2/GAS6/IRF7/NOC2L/ADA/SLC39A10/MIF/LYN	45	0.483871
GO:0015698	BP	GO:0015698	inorganic anion transport	82/6492	186/18903	0.00354433	0.0319362	0.0240657	GABRA3/CLCA4/SLC11A1/BEST2/ANO2/IP6K2/ABCC9/ANO8/SLC1A3/OSTM1/ABCB1/SLC4A11/SLC26A3/APOL1/SLC25A14/GABRE/CA2/SLC39A14/SLC17A7/SLC5A5/GABRA4/SLC4A9/GABRG2/SLC12A7/CLCN2/SLC1A4/GPR89A/CRY2/SLC12A5/ABCC10/ABCC4/WNK4/BEST3/ANO1/ANO3/ADAMTS8/TTYH3/SLC37A4/SLC5A6/SLC39A8/BEST4/XPR1/SLC26A1/GLRA3/ANO7/SLC12A9/ANO4/GABRA2/CLIC2/SLC34A2/SLC37A1/RACGAP1/BSND/GABRG1/VDAC2/TTYH1/BEST1/SLC22A11/CA7/CLIC4/SLC2…	82	0.44086
GO:0008045	BP	GO:0008045	motor neuron axon guidance	18/6492	30/18903	0.00354463	0.0319362	0.0240657	SEMA3F/MYCBP2/LAMC2/NTN1/SEMA3A/LHX3/EPHA4/LHX4/EGR2/PLXNA3/ERBB2/SLIT2/NTN3/CDK5/RHOH/PLXNA4/TMEFF1/LHX1	18	0.6
GO:0030204	BP	GO:0030204	chondroitin sulfate metabolic process	18/6492	30/18903	0.00354463	0.0319362	0.0240657	DCN/XYLT2/CHPF2/XYLT1/HYAL4/HYAL1/CHST3/CHPF/IDUA/CHSY1/CSGALNACT1/CSGALNACT2/CHST11/DSEL/NDNF/B3GALT6/CHST13/BGN	18	0.6
GO:1902230	BP	GO:1902230	negative regulation of intrinsic apoptotic signaling pathway in response to DNA damage	18/6492	30/18903	0.00354463	0.0319362	0.0240657	KDM1A/BID/TMEM161A/SIRT1/CXCL12/CLU/SNAI1/TPT1/ACKR3/SFRP2/DDIAS/USP47/TRIAP1/BCL2L1/BCL2/ATAD5/MUC1/MIF	18	0.6
GO:0006066	BP	GO:0006066	alcohol metabolic process	151/6492	367/18903	0.00363165	0.0326748	0.0246222	IGF1/OSBPL5/HSD17B6/CYP46A1/DKK3/MSMO1/DGAT2/SPHK2/INPP5A/IP6K2/SREBF1/SCARB1/DHRS9/SCARF1/SYNJ2/ADCYAP1R1/RDH8/LRP2/AKR1B1/ITPKC/SEC14L2/CYP2D6/CYB5R3/MIOX/APOL1/ACO2/ITPK1/PCK2/HAO1/GDPD3/SQLE/ISYNA1/MOGAT3/CUBN/MINPP1/GALK1/SULT1E1/NFKB1/INPP4B/APOA5/MVK/CYP27B1/ALDH2/TPI1/BMP5/SCAP/CLCN2/SPR/DHCR24/LEPR/PLA2G4A/AKR1A1/APOA1/TTR/EPHX2/LRAT/CAT/OCRL/AKR1D1/NUDT10/BMP2/SRD5A3/APOL2/CLN6/LDLR/APO…	151	0.411444
GO:0120193	BP	GO:0120193	tight junction organization	40/6492	81/18903	0.00365861	0.0328716	0.0247705	ABCC8/CLDN18/ROCK1/GRHL2/OCEL1/TJP1/LSR/MPDZ/IL17A/SRF/ECT2/TGFB3/SNAI1/RAMP2/NPHP4/EPHB2/ROCK2/APC/MARVELD3/EPHA2/NPHP1/PARD3/MPP7/F11R/CLDN14/FZD5/CLDN1/MICALL2/SVEP1/CLDN3/CLDN2/CDH5/GPBAR1/CLDN5/CLDN6/CLDN24/CLDN4/MYO1C/CLDN9/PECAM1	40	0.493827
GO:0048477	BP	GO:0048477	oogenesis	49/6492	103/18903	0.00369372	0.0330951	0.024939	IGF1/ASPM/RPS6KA2/TRIP13/AURKA/CDC25B/AMH/AURKC/MDK/FBXO5/FOXO3/TNFAIP6/EREG/DMRT1/PAQR5/BMPR1B/PDE5A/LGR5/BRCA2/HORMAD1/STRA8/DIAPH2/ATM/EDNRA/NPR2/TDRD5/INHBB/TDRD10/IHH/PTX3/SOHLH1/METTL3/BNC1/PAQR8/BCL2/PDE3A/GPR149/TDRD6/TDRKH/PAQR7/FIGLA/FOXL2/NANOS3/ZP3/NANOS1/SRC/ANG/ZGLP1/TUBB8	49	0.475728
GO:0070167	BP	GO:0070167	regulation of biomineral tissue development	49/6492	103/18903	0.00369372	0.0330951	0.024939	GPM6B/ROCK1/MEF2C/P2RX7/GATA1/COMP/BMPR1A/CYP27B1/MGP/FBXO5/ACVR2B/WNT6/TGFB3/SRGN/SOX9/BMP2/OMD/TRPM4/ENAM/ROCK2/HEY2/TFAP2A/MMP20/BMPR1B/FBN2/ECM1/OSR1/AHSG/DMP1/DDR2/PKDCC/SGMS2/HEY1/NOS3/GREM1/LTBP3/ADRB2/S1PR1/ANO6/SLC8A1/GAS6/TMEM119/ISG15/AMTN/FZD9/ENPP1/BMPR2/IFITM5/ACTN3	49	0.475728
GO:0006953	BP	GO:0006953	acute-phase response	26/6492	48/18903	0.00372291	0.0332645	0.0250666	PTGER3/TFRC/PTGS2/TFR2/IL1A/TNFSF11/APOL2/LBP/EPO/CRP/APCS/SAA2/EDNRB/IL6/AHSG/PTGES/SAA4/IL6R/SAA1/A2M/F2/F8/SERPINA1/ORM1/INS/HP	26	0.541667
GO:0061028	BP	GO:0061028	establishment of endothelial barrier	26/6492	48/18903	0.00372291	0.0332645	0.0250666	VCL/ROCK1/RAPGEF3/ADD1/EZR/PPP1R16B/TJP1/PDE4D/PROC/RAP1A/ROCK2/EDNRB/EDNRA/ROBO4/F11R/CLDN1/CLDN3/FASN/CDH5/MYADM/PLCB1/CLDN5/PDE2A/S1PR3/PECAM1/S1PR2	26	0.541667
GO:0010212	BP	GO:0010212	response to ionizing radiation	65/6492	143/18903	0.00374215	0.0333903	0.0251614	KDM1A/BRCA1/BAK1/HSPA5/RAD51/CYBA/POLB/RAD54L/BAX/MSH2/SIRT1/EYA1/SFRP1/BRAT1/GATA3/CCL7/CRYAB/CCND1/RAD51AP1/SOD2/ECT2/IL1A/ITGB6/GADD45A/CCND2/DNMT3A/EGR1/CDKN1A/FIGNL1/MEN1/CLOCK/ANXA1/MDM2/MYC/YAP1/ABCG5/NABP2/BRCA2/PML/TICRR/INTS7/RHOB/FANCD2/SFRP2/ALAD/ATM/XRCC4/PAXIP1/TOPBP1/PRAP1/RFWD3/CXCL10/BCL2L1/BCL2/RHNO1/RAD9A/HRAS/CLK2/CHEK2/DCUN1D3/XRCC2/RAD54B/BLM/GPX1/PRKDC	65	0.454545
GO:0031098	BP	GO:0031098	stress-activated protein kinase signaling cascade	105/6492	246/18903	0.00380721	0.0337946	0.025466	WNT16/PAFAH1B1/MAPK8IP2/ZMYND11/HGF/MAP2K3/TRAF1/SEMA3A/TRAF4/MAGI3/TRAF5/CYLD/EZR/SH2D3C/TREM2/GADD45B/BIRC7/RASSF2/PYCARD/RIPK2/SFRP1/AMBP/DUSP3/NFKB1/MAPK10/CRYAB/HIPK3/FOXM1/LTBR/IL26/TPD52L1/SASH1/DUSP22/PDCD10/IL1A/GADD45A/SLAMF1/MMP8/DUSP1/TNFSF11/MAPK8IP1/UNC5CL/BMP2/PRMT1/TRAF2/ZFP36/ARHGEF6/GADD45G/MAP3K10/DUSP9/EDA2R/GPS2/MEN1/ANKRD6/DAB2IP/TLR4/MYC/SDCBP/MAPKBP1/MARVELD3/NCOR1/SFRP2/M…	105	0.426829
GO:0010518	BP	GO:0010518	positive regulation of phospholipase activity	29/6492	55/18903	0.00380748	0.0337946	0.025466	SELE/ARHGAP6/LPAR2/PRKCZ/FGFR1/ADCYAP1R1/ESR1/HTR2A/ITK/ADRA1A/S1PR4/PLA2G5/PDGFRA/GPR55/HTR2B/FGF2/AGTR1/EDNRA/GNAQ/KIT/AVPR1A/P2RY12/NMUR1/P2RY6/RASGRP4/HRAS/LPAR1/ANG/APOC2	29	0.527273
GO:2000179	BP	GO:2000179	positive regulation of neural precursor cell proliferation	29/6492	55/18903	0.00380748	0.0337946	0.025466	KDM1A/CX3CL1/CDON/ASPM/WDR62/DCT/LRP2/SMARCD3/LHX5/LHX2/PITX3/MDK/GLI1/NR2E1/PROX1/NES/FGF2/DMRTA2/ITGB1/SHH/CX3CR1/OTP/ID4/GNG5/FOXG1/FZD9/GJC2/LYN/LHX1	29	0.527273
GO:0033273	BP	GO:0033273	response to vitamin	42/6492	86/18903	0.0038178	0.0337946	0.025466	OTC/PTGS2/CYP26A1/PHEX/SFRP1/CCND1/FOLR1/CYP27B1/SOD2/BCHE/IL1A/KYNU/SPP1/DNMT3A/TRIM25/LRAT/CAT/TRIM24/RUNX2/EPO/MAP1B/RARA/POSTN/TSHB/BRIP1/PIM1/PDX1/CYP1A1/ALAD/STC1/CBS/AQP3/FOLR2/MN1/CXCL10/TYMS/MTHFR/PENK/GAS6/NDOR1/KANK2/GPX1	42	0.488372
GO:0030203	BP	GO:0030203	glycosaminoglycan metabolic process	57/6492	123/18903	0.00381881	0.0337946	0.025466	HS3ST1/IDS/DCN/XYLT2/B4GALT7/CHPF2/HMMR/PDGFB/ITIH6/HAS3/XYLT1/CEMIP/HAS1/HYAL4/NFKB1/UST/HYAL1/B4GALT4/CHST3/ITIH5/TNFAIP6/CHPF/ST3GAL3/IDUA/CLN6/CHSY1/LYVE1/STAB2/EDNRB/FGF2/LYG1/CSGALNACT1/B3GAT3/EDNRA/ITIH2/HS3ST3A1/ANGPT1/PXYLP1/PGLYRP2/PGLYRP4/NDST3/CSGALNACT2/GUSB/GLB1/HS6ST2/CHST11/DSEL/HPSE2/NDNF/B4GAT1/B3GALT6/B3GNT4/B3GNT3/CHST13/BGN/CHST6/LYG2	57	0.463415
GO:0030282	BP	GO:0030282	bone mineralization	57/6492	123/18903	0.00381881	0.0337946	0.025466	IGF1/IBSP/GPM6B/IFT80/PTGS2/MEF2C/SNX10/PTHLH/P2RX7/GATA1/PHEX/ERCC2/COMP/BMPR1A/MINPP1/CYP27B1/MGP/ACVR2B/TGFB3/SRGN/SOX9/BMP2/SBDS/OMD/TRPM4/TFAP2A/MMP13/BMPR1B/FBN2/TUFT1/ECM1/OSR1/AHSG/RSPO2/KLF10/PTH1R/ALOX15/DDR2/PKDCC/CLEC3B/SGMS2/GREM1/LTBP3/ROR2/ADRB2/S1PR1/ANO6/SLC8A1/TMEM119/SLC24A3/ISG15/FZD9/ENPP1/CCDC154/BMPR2/IFITM5/ACTN3	57	0.463415
GO:0008210	BP	GO:0008210	estrogen metabolic process	22/6492	39/18903	0.0038451	0.0339345	0.0255715	RDH8/CYP2D6/HSD17B1/SULT1E1/HSD17B7/PDGFRA/CYP1B1/CYP2C9/CYP2C8/CYP1A1/CYP1A2/UGT2B4/CYP3A4/CYP3A7/TIPARP/SGPL1/UGT2B15/UGT2B17/HSD3B1/AKR1B15/UGT1A3/DHRS11	22	0.564103
GO:0044273	BP	GO:0044273	sulfur compound catabolic process	22/6492	39/18903	0.0038451	0.0339345	0.0255715	DPEP1/ACAT1/ACOT7/AHCY/MLYCD/HYAL4/HYAL1/IDUA/MPST/CHAC1/CDO1/SUCLA2/CSAD/NUDT7/CHAC2/MAT1A/CBS/NUDT8/GLB1/FITM2/NUDT19/GGTLC3	22	0.564103
GO:0060021	BP	GO:0060021	roof of mouth development	44/6492	91/18903	0.00394851	0.0347996	0.0262233	DLX6/TGFBR3/DLX5/MEOX2/BMPR1A/ACVR2B/ITGB6/TCF21/TGFB3/TBX2/INHBA/SNAI1/WFIKKN1/EPHB2/PDGFRA/TFAP2A/LRRC32/FRAS1/COL2A1/SMAD4/OSR1/CSRNP1/VAX1/ARID5B/WNT7A/SKI/PKDCC/MSX1/PYGO2/TGFBR2/TIPARP/HAND2/SHH/SGPL1/CHD7/BNC2/WFIKKN2/SOX11/TMEM107/TSHZ1/FZD2/TBX1/CLDN5/COL11A2	44	0.483516
GO:0045936	BP	GO:0045936	negative regulation of phosphate metabolic process	178/6492	440/18903	0.00398684	0.0350896	0.0264419	DBNDD1/PRKAR2B/SPAG9/GPRC5A/WWTR1/HGF/BAK1/PPP2R5A/PRKCZ/ROCK1/HDAC4/LRP6/SIRT6/FBLN1/GCKR/TMED2/PPP1R15A/BAX/FKBP1A/IRAK3/TFAP4/SIRT1/ABL1/GADD45B/PDGFB/SLC8A3/BDKRB1/TRIB3/RASSF2/CDK5RAP1/PPP1R16B/SMAD7/PYCARD/SFRP1/CAV1/GRB10/PRKAG2/DKK1/GIT1/CDK5RAP3/DUSP3/PRKAR1A/IL2/HIPK3/CORO1C/IFNG/PTPN6/DUSP22/PDE4D/KAT2B/PRKAR2A/NPRL2/ERRFI1/GADD45A/RGS2/TNFAIP3/PPP4R4/DUSP1/MASTL/MAPK8IP1/CRY2/INHBA/NC…	178	0.404545
GO:1903825	BP	GO:1903825	organic acid transmembrane transport	70/6492	156/18903	0.00399398	0.0351047	0.0264533	SLC25A13/SLC6A13/SLC6A7/SLC38A5/SLC11A1/ATP1A2/SLC7A9/MPC1/SLC46A1/SLC1A3/LRP2/ABCB1/SLC25A1/SLC16A8/SLC25A14/SLC25A15/SLC38A7/SLC7A6/SLC17A7/SLC1A6/FOLR1/SLC6A12/SLC38A1/SLC16A10/SLC25A12/SLC1A4/RGS2/SLC16A7/SLC25A2/SLC6A6/SLC6A11/PER2/SLC38A2/THBS1/SLC5A6/SLC3A1/SLC38A4/SLC38A6/SLC13A5/SLC16A3/SLC16A2/SLC43A1/ITGB1/SLC7A11/SFXN2/MFSD12/SLC6A20/SFXN1/SLC7A3/FOLR2/SLC3A2/SLC23A1/ARL6IP1/LRRC8D/AB…	70	0.448718
GO:0046330	BP	GO:0046330	positive regulation of JNK cascade	46/6492	96/18903	0.00405295	0.0355746	0.0268074	WNT16/TRAF1/SEMA3A/TRAF4/TRAF5/GADD45B/BIRC7/RASSF2/PYCARD/RIPK2/LTBR/TPD52L1/DUSP22/IL1A/GADD45A/SLAMF1/MMP8/TNFSF11/MAPK8IP1/UNC5CL/TRAF2/GADD45G/MAP3K10/EDA2R/ANKRD6/DAB2IP/TLR4/SDCBP/MAPKBP1/MFHAS1/DIXDC1/TNIK/WNT7A/FZD7/FGF19/DUSP19/TLR3/MAP4K2/CCL19/SH3RF3/HRAS/MTURN/PLCB1/CARD9/PJA2/AGER	46	0.479167
GO:0001819	BP	GO:0001819	positive regulation of cytokine production	195/6492	486/18903	0.00409479	0.0358143	0.026988	DHX33/ABCC8/CX3CL1/NOS2/BRCA1/CD6/SLC11A1/HGF/NLRP2/POU2F2/CYBA/SPHK2/PRKCZ/BCL3/RORA/PANX2/PTGS2/IL12RB2/C1QTNF3/FCN1/P2RX7/OAS1/IRAK3/NLRP1/CD200/TREM2/SIRT1/JAK2/ABL1/HMOX1/NFATC4/FERMT1/CD40LG/RGCC/PYCARD/CD276/RIPK2/GSDMD/TYK2/C5/GATA3/BMPR1A/DHX58/KAT2A/IL2/MDK/CD81/POU2AF1/IL23A/OAS3/OAS2/IL26/IFNG/GAPDH/IL17A/ITK/POLR3G/PDE4D/HHLA2/FOXP1/IL1A/IFIH1/SPTBN1/STAT1/IL1RL1/SLAMF1/CD160/F3/MMP8…	195	0.401235
GO:1902903	BP	GO:1902903	regulation of supramolecular fiber organization	157/6492	384/18903	0.00409501	0.0358143	0.026988	FKBP4/CX3CL1/TMSB10/MYOC/CAPG/ARHGAP6/ELN/CYFIP2/NCKAP1/CTNNA2/NAV3/ROCK1/PFN2/SPTB/FERMT2/CLASP1/ADD2/CAMSAP3/ACTN2/RAPGEF3/ADD1/TPX2/ARHGAP28/TREM2/ABL1/SH3BP1/PICK1/PFDN4/SPEF1/RGCC/PYCARD/CORO2B/TJP1/SFRP1/ARHGEF10/CLIP3/PIK3R2/MET/LIMK1/KANK1/CXCL12/GIT1/CSF3/SLAIN2/CRYAB/ARPC3/WASF1/SPTBN1/TACR1/STMN1/PROX1/APOA1/TGFB3/CLU/SORBS3/CIT/NCKAP1L/ARHGAP40/DSTN/VIL1/BAIAP2L2/CGNL1/TMOD2/TTBK2/FGF…	157	0.408854
GO:0030178	BP	GO:0030178	negative regulation of Wnt signaling pathway	77/6492	174/18903	0.00409686	0.0358143	0.026988	HECW1/WWTR1/DKK3/PTPRU/IFT80/JADE1/CYLD/NLK/NFATC4/FERMT1/FGF9/SFRP1/TLE6/CAV1/GRB10/TLE4/DKK1/MDK/GLI1/MDFI/TBX18/CSNK1A1/IGFBP2/MAD2L2/FOXO3/SFRP5/TNN/EGR1/LRP1/SOX9/BMP2/NFATC1/BARX1/NPHP4/LRP4/UBAC2/APC/ANKRD6/DAB2IP/PRICKLE1/NKD1/RBMS3/LIMD1/SFRP2/IGFBP1/LATS2/FOXO1/APCDD1/DKK2/WIF1/DRAXIN/SHH/SOX17/FZD6/CTHRC1/DACT1/MESP1/GREM1/IGFBP6/TMEM88/SOST/MCC/RNF213/FZD4/HIC1/SHISA3/CTNNBIP1/SHISA2/…	77	0.442529
GO:0048844	BP	GO:0048844	artery morphogenesis	39/6492	79/18903	0.00410634	0.0358488	0.027014	TFAP2B/PRDM1/MYLK/NOTCH3/LRP2/SMAD7/FOXF1/EYA1/COMP/HOXA13/BMPR1A/FGF8/FOLR1/MDK/SRF/HES1/AKT3/PROX1/PKD2/TBX2/LRP1/SOX4/SIX1/LDLR/ANGPTL3/HEY2/STRA6/ACVRL1/MYOCD/EDNRA/FOXH1/ADAMTS9/HAND2/CITED2/HEY1/CHD7/EFEMP2/TBX1/BMPR2	39	0.493671
GO:0060314	BP	GO:0060314	regulation of ryanodine-sensitive calcium-release channel activity	16/6492	26/18903	0.00415189	0.0361976	0.0272768	FKBP1A/JPH4/PDE4D/CASQ2/PKD2/HRC/CAMK2D/JPH2/AKAP6/JPH3/CLIC2/JSRP1/PLN/CALM1/DMD/GSTM2	16	0.615385
GO:0055010	BP	GO:0055010	ventricular cardiac muscle tissue morphogenesis	25/6492	46/18903	0.00416095	0.0362277	0.0272995	PKP2/COL11A1/TGFBR3/LRP2/FKBP1A/SMAD7/BMPR1A/HAND1/TNNC1/PROX1/TNNT2/TNNI3/HEY2/TPM1/SMAD4/EDNRA/POU4F1/TNNI1/MYL3/FOXH1/ZFPM2/CHD7/HEG1/NKX2-5/RYR2	25	0.543478
GO:0007498	BP	GO:0007498	mesoderm development	62/6492	136/18903	0.00419952	0.0363151	0.0273653	ITGA3/TIE1/TP63/PAX2/ITGA8/PALB2/DLL3/PUS7/JAK2/BMX/FOXF1/EYA1/AMH/MEST/LHX2/BMPR1A/FGF8/DKK1/WNT3/PRKAR1A/SRF/HAND1/ACVR2B/TLX2/WLS/INHBA/SNAI1/TCF15/AHDC1/ITGB4/KDM6B/KLF4/YAP1/SMAD4/EPHA2/TBX19/OSR1/SFRP2/CRB2/HMGA2/ITGB1/POU4F1/SSBP3/ETS2/FOXH1/CITED2/TBX20/SHH/MESP1/ZFPM2/OVOL1/HES7/TBX1/ZFP36L1/MESP2/TXNRD1/BMPR2/TRIM15/APELA/ITGB3/SCX/LHX1	62	0.455882
GO:0009113	BP	GO:0009113	purine nucleobase biosynthetic process	8/6492	10/18903	0.00420467	0.0363151	0.0273653	PAICS/PPAT/GART/GMPS/HPRT1/SHMT2/ADA/APRT	8	0.8
GO:0051933	BP	GO:0051933	amino acid neurotransmitter reuptake	8/6492	10/18903	0.00420467	0.0363151	0.0273653	SLC6A13/ATP1A2/SLC6A12/SLC6A11/PER2/ITGB1/KCNJ10/CLN8	8	0.8
GO:0070472	BP	GO:0070472	regulation of uterine smooth muscle contraction	8/6492	10/18903	0.00420467	0.0363151	0.0273653	TACR2/TACR1/ADRA2A/GPER1/TACR3/OXTR/SETD3/ADRA2B	8	0.8
GO:0099151	BP	GO:0099151	regulation of postsynaptic density assembly	8/6492	10/18903	0.00420467	0.0363151	0.0273653	CBLN1/LRRC4B/NTRK3/LRRTM2/PTPRD/NPTX1/LRFN4/IL1RAP	8	0.8
GO:1902412	BP	GO:1902412	regulation of mitotic cytokinesis	8/6492	10/18903	0.00420467	0.0363151	0.0273653	BIRC5/CDCA8/KIF20B/ANKRD53/INCENP/DCDC1/AURKB/NUP62	8	0.8
GO:2000351	BP	GO:2000351	regulation of endothelial cell apoptotic process	31/6492	60/18903	0.00423072	0.0364907	0.0274977	ABL1/CD40LG/RGCC/FGF21/GATA3/CCL2/NFE2L2/CD160/TNFAIP3/FOXO3/TEK/KDR/PAK4/RAMP2/THBS1/PDCD4/ANGPT1/TERT/GPER1/IL13/FGG/FGA/FGB/SCG2/NDNF/CD248/ANO6/CDH5/GAS6/HLA-G/ECSCR	31	0.516667
GO:0019216	BP	GO:0019216	regulation of lipid metabolic process	143/6492	347/18903	0.00424878	0.0364907	0.0274977	PDK4/PDK2/BRCA1/DKK3/DGAT2/SPHK2/ABCA7/PPP2R5A/GAL/RORA/EPHA8/SREBF1/SCARB1/PTGS2/ACACB/SIRT6/FMO2/SORBS1/TREM2/SIRT1/SEC14L2/PDGFB/HNF4A/EEF1A2/TRIB3/HTR2A/MLYCD/MTMR9/FGF21/CAV1/PRKAG2/MTMR4/NFKB1/PPARGC1A/APOA5/APOC3/CD81/CYP27B1/CREBL2/IFNG/BMP5/NR3C1/SCAP/AADAC/CLCN2/IL1A/ID2/PROX1/APOA1/NR4A3/TEK/EGR1/EPHX2/FLT3/ORMDL2/SNAI1/SOX9/MBOAT7/C3/BMP2/THRA/ORMDL1/LDLR/APOC1/RGN/GPS2/ANGPTL3/VAV3/L…	143	0.412104
GO:0032411	BP	GO:0032411	positive regulation of transporter activity	58/6492	126/18903	0.00425063	0.0364907	0.0274977	ABCC8/EHD3/WNK1/GAL/CACNG4/ACTN2/ABCB1/TREM2/SGK2/PPP3CB/CCL2/KCNA1/IFNG/KMT2A/SGK1/PKD2/PPP3CC/WNK4/HSPA2/SYNGR3/ATP1B2/RGN/EPHB2/TRPC6/COX17/STAC/ANK2/JPH2/AKAP6/EDNRA/CNKSR3/CACNA2D1/RNF207/PINK1/IFNGR2/CDK5/CACNB2/STIM1/CACNB3/ADRB2/KCNK3/P2RY6/HAP1/PDZK1/AMIGO1/CACNB4/GALR2/LRRC26/STAC3/RELN/NLGN3/ARC/RYR2/STK39/CALM1/DMD/GSTM2/KCTD7	58	0.460317
GO:0001824	BP	GO:0001824	blastocyst development	54/6492	116/18903	0.00425269	0.0364907	0.0274977	PSMC4/IGF1/CUL3/NLE1/PALB2/CNOT3/SMARCB1/MFNG/GINS1/SALL4/ASF1B/BYSL/SRF/HAND1/MFN2/NEK2/PPP4R4/NECAB1/SBDS/EMG1/SPECC1/CCDC62/NASP/PEMT/WDR74/TTLL4/ACTL6A/KLF4/YAP1/BRCA2/CMTM3/HORMAD1/PNLDC1/NCAPG2/GINS4/ST8SIA6/CHEK1/LATS2/PHF6/CCDC24/SMIM14/CITED2/SOX17/CDX2/NDEL1/JUNB/RRM2/TBL1XR1/ZP3/FBLL1/RRP7A/ADA/TEAD4/POU5F1	54	0.465517
GO:0010092	BP	GO:0010092	specification of animal organ identity	21/6492	37/18903	0.00426336	0.0364907	0.0274977	FGF10/PAX2/MEF2C/LRP2/SMARCD3/WNT2/FGF8/DKK1/HOXC11/PAX8/BMP2/SIX1/GATA5/WNT2B/TBR1/FGF2/FOXH1/SPRY1/MESP1/GDNF/AR	21	0.567568
GO:0033044	BP	GO:0033044	regulation of chromosome organization	107/6492	252/18903	0.00426736	0.0364907	0.0274977	MAD1L1/NCAPD2/DPF1/DDX11/TACC3/CUL3/PNKP/SPDL1/SMARCD1/SMG6/TRIP13/MCM2/ACTB/SIRT6/SMARCA2/NDC80/SMARCD3/ATRX/BIRC5/CDC6/SMARCB1/ACTR5/NAA10/TFPT/SMARCD2/NCAPG/FBXO5/TTK/SMC4/KAT2B/INO80B/MAD2L2/CDC20/NEK2/CENPF/DUSP1/NCAPH/ZWINT/CDK2/XRCC3/DLGAP5/SMARCA4/PHF10/TRIM28/DNMT1/DKC1/TOP2A/SLX1A/CCNB1/CDCA8/APC/NAT10/ESPL1/PKIB/ACTL6A/SMC2/MYC/CENPE/NABP2/PIF1/PML/ANAPC11/NUF2/SETDB1/NAF1/CDCA5/CCT6A/…	107	0.424603
GO:0006111	BP	GO:0006111	regulation of gluconeogenesis	28/6492	53/18903	0.00426908	0.0364907	0.0274977	PDK2/CRY1/DGAT2/SIRT6/C1QTNF3/SIRT1/KAT2A/PPARGC1A/NR3C1/KAT2B/LEPR/ACADM/NLN/SIK1/OGT/SOGA1/FOXO1/RANBP2/SERPINA12/GPT/ZNF692/MST1/CLK2/PGP/PPARA/SIRT7/WDR5/INS	28	0.528302
GO:0051100	BP	GO:0051100	negative regulation of binding	73/6492	164/18903	0.00427013	0.0364907	0.0274977	KDM1A/DDX11/ROCK1/ATP2A3/ACTB/RAP1GAP/BAX/AURKA/ARHGAP28/TFAP4/GEMIN2/JAK2/CYP2D6/HMOX1/PDGFB/NFKBIA/NFATC4/CTSZ/E2F1/GATA1/CAV1/LHX2/DKK1/BAG2/MDFI/HAND1/MAD2L2/NEK2/IFIT2/CDKN1A/SYMPK/WFIKKN1/TTBK2/MYOD1/HABP4/PER2/NES/CAMK1/HEY2/TDG/PEX14/ADAM15/TTBK1/C9orf72/ZNF462/HMGA2/MITD1/MSX1/C4orf3/HAND2/HEY1/DACT1/ANKRD33/XIRP1/PCSK9/ADRB2/P2RY1/PPP1CA/WFIKKN2/SOX11/JUN/SUMO4/CTNNBIP1/AURKB/ZFPM1/RGMA…	73	0.445122
GO:0008154	BP	GO:0008154	actin polymerization or depolymerization	87/6492	200/18903	0.00429128	0.036623	0.0275974	GAS7/TMSB10/CAPG/ARHGAP6/ELN/CYFIP2/NCKAP1/PFN2/SPTB/ADD2/ACTN2/ADD1/ARHGAP28/JAK2/ABL1/SH3BP1/PYCARD/PIK3R2/KANK1/CXCL12/CSF3/ARPC3/WASF1/SPTBN1/WIPF1/CIT/NCKAP1L/ARHGAP40/DSTN/VIL1/BAIAP2L2/TMOD2/SNX9/ARPC1B/HIP1R/KANK4/WASF3/SWAP70/SPIRE1/FHOD3/MICAL1/BIN1/TMOD1/ARPC5L/FHDC1/SPTBN5/ABI2/DIAPH3/SLIT2/DAAM2/DIAPH2/GSN/MSRB2/ADD3/CDC42EP2/FER/EPS8/PSTPIP2/PLEKHH2/ENAH/TMSB15A/TMSB15B/CATIP/ARHGAP…	87	0.435
GO:0060041	BP	GO:0060041	retina development in camera-type eye	71/6492	159/18903	0.00435156	0.0370347	0.0279077	SOX8/TFAP2B/LAMC3/ATP2B4/CDON/PAX2/SMARCD3/BAX/RPGRIP1/LRP5L/VSX1/CELF4/LAMA1/RS1/RP1/CALB1/SLC17A7/CASP2/LHX2/TCIRG1/MDM1/NR2E1/HES1/ACVR2B/CLCN2/DLX2/VAX2/PROX1/SOX9/RHOJ/SMARCA4/NPHP4/SERPINF1/CRB1/PDGFRA/ACTL6A/TFAP2A/CYP1B1/SIX3/BMPR1B/FOXN4/ACVRL1/SCAPER/NPHP1/DLX1/CRB2/ROM1/GPM6A/LPCAT1/MEGF11/SKI/HIPK1/IHH/FAT3/VSTM4/TUB/STAT3/CLIC4/CHD7/LAMB2/FZD4/CABP4/ZHX2/FJX1/ATOH7/CLN8/DIO3/ARHGEF15…	71	0.446541
GO:0060828	BP	GO:0060828	regulation of canonical Wnt signaling pathway	110/6492	260/18903	0.00435442	0.0370347	0.0279077	HECW1/MKS1/WWTR1/DKK3/WNK1/PTPRU/CDH3/ASPM/FGF10/NLE1/JADE1/CYLD/GID8/FERMT1/TBL1X/FGF9/SFRP1/TLE6/PLEKHA4/DLX5/CAV1/TLE4/KANK1/DKK1/IFT20/NFKB1/FOLR1/MDK/GLI1/PTK7/TBX18/CSNK1A1/IGFBP2/USP34/MAD2L2/WLS/TMEM9/FOXO3/SFRP5/TNN/EGR1/RECK/SOX4/SOX9/BMP2/TRPM4/NPHP4/ZBED3/LGR6/CSNK1G2/LRP4/UBAC2/APC/ANKRD6/DAB2IP/YAP1/FGF2/PRICKLE1/LGR5/NKD1/PRDM15/RBMS3/LIMD1/SFRP2/DAAM2/RSPO3/IGFBP1/RSPO2/LATS2/FOXO…	110	0.423077
GO:0050678	BP	GO:0050678	regulation of epithelial cell proliferation	168/6492	414/18903	0.00437064	0.0370347	0.0279077	ARX/DLX6/NME2/BID/IGF1/CYBA/PTPRN/CDH3/TIE1/IFT80/TGFBR3/FGF10/LIMS2/TP63/MYDGF/PAX2/RAP1GAP/SIRT6/FGFR1/CPB2/MEF2C/PGR/BAX/APOH/TGM1/SIRT1/HMOX1/PDGFB/SIX4/PPP1R16B/FGF9/RGCC/ESRP2/FA2H/EYA1/SFRP1/HPN/DLX5/CAV1/WNT2/GATA3/CXCL12/BMPR1A/CCL2/AREG/CCND1/MDK/GLI1/IL26/ST8SIA1/BMP5/PDCD10/HES1/HYAL1/TACR1/STAT1/ERRFI1/AKT3/F3/PROX1/NRP2/TNFAIP3/KLF9/NR4A3/PGF/NKX2-3/TEK/TRIM24/NR4A1/RUNX2/EREG/SOX9/…	168	0.405797
GO:0035567	BP	GO:0035567	non-canonical Wnt signaling pathway	36/6492	72/18903	0.00437387	0.0370347	0.0279077	CELSR3/MKS1/MYOC/IFT80/NLK/ABL1/DAAM1/SPEF1/SFRP1/PLEKHA4/DKK1/PTK7/SFRP5/ANKRD6/PRICKLE1/NKD1/ARHGEF19/SFRP2/DAAM2/RSPO3/WNT7A/FZD7/FZD5/PRICKLE2/FZD6/CTHRC1/DACT1/ROR2/RNF213/FZD4/LBX2/FZD2/GPC6/ROR1/MAGI2/FZD9	36	0.5
GO:0060411	BP	GO:0060411	cardiac septum morphogenesis	36/6492	72/18903	0.00437387	0.0370347	0.0279077	MKS1/TGFBR3/LRP2/TBX5/SMAD7/DNAH11/BMPR1A/FGF8/BMP5/HAND1/HES1/PROX1/NRP2/TBX2/SOX4/NOTCH2/HEY2/MDM2/GATA6/SMAD4/SLIT2/TGFBR2/CITED2/TBX20/HEY1/NOS3/ZFPM2/CHD7/SOX11/ZFPM1/FZD2/NKX2-5/TBX1/SLIT3/PARVA/BMPR2	36	0.5
GO:1900046	BP	GO:1900046	regulation of hemostasis	36/6492	72/18903	0.00437387	0.0370347	0.0279077	ENPP4/TFPI/PLAUR/FAP/CPB2/APOH/PDGFB/COMP/CAV1/KNG1/HRG/PROC/NFE2L2/F3/SERPINC1/PLAU/FOXA2/TPH1/F12/EPHB2/PDGFRA/THBS1/EMILIN1/UBASH3B/USF1/NOS3/FGG/FGA/FGB/CD34/ANO6/F2/F2R/PROS1/PRKG1/SERPINB2	36	0.5
GO:0010563	BP	GO:0010563	negative regulation of phosphorus metabolic process	178/6492	441/18903	0.00444524	0.0375547	0.0282995	DBNDD1/PRKAR2B/SPAG9/GPRC5A/WWTR1/HGF/BAK1/PPP2R5A/PRKCZ/ROCK1/HDAC4/LRP6/SIRT6/FBLN1/GCKR/TMED2/PPP1R15A/BAX/FKBP1A/IRAK3/TFAP4/SIRT1/ABL1/GADD45B/PDGFB/SLC8A3/BDKRB1/TRIB3/RASSF2/CDK5RAP1/PPP1R16B/SMAD7/PYCARD/SFRP1/CAV1/GRB10/PRKAG2/DKK1/GIT1/CDK5RAP3/DUSP3/PRKAR1A/IL2/HIPK3/CORO1C/IFNG/PTPN6/DUSP22/PDE4D/KAT2B/PRKAR2A/NPRL2/ERRFI1/GADD45A/RGS2/TNFAIP3/PPP4R4/DUSP1/MASTL/MAPK8IP1/CRY2/INHBA/NC…	178	0.403628
GO:0003181	BP	GO:0003181	atrioventricular valve morphogenesis	15/6492	24/18903	0.0044527	0.0375547	0.0282995	TBX5/BMPR1A/SOX4/BMP2/OLFM1/HEY2/MDM2/SMAD4/TGFBR2/HEY1/DCHS1/EFNA1/ZFPM1/SLIT3/BMPR2	15	0.625
GO:0072202	BP	GO:0072202	cell differentiation involved in metanephros development	15/6492	24/18903	0.0044527	0.0375547	0.0282995	WWTR1/PAX2/PDGFB/SALL1/STAT1/TCF21/PAX8/LIF/YAP1/OSR1/GREM1/GDNF/LAMB2/CD34/POU3F3	15	0.625
GO:0048588	BP	GO:0048588	developmental cell growth	98/6492	229/18903	0.00460459	0.0387853	0.0292268	SEMA3F/PAFAH1B1/SPAG9/SEMA3G/IGF1/VCL/CDH1/RTN4R/CYFIP2/NTN1/PRKCZ/SEMA3A/SPAG6/RIMS1/RAB21/ULK2/AURKA/NRCAM/DPYSL2/SEMA4G/ABL1/CPNE6/SMAD7/PTPRS/MEGF8/MAG/LIMK1/LHX2/CXCL12/PPP3CB/WNT3/RND2/WASF1/SRF/PLXNA1/FOXP1/RGS2/NRP2/SPP1/TNN/ADRA1A/CXCR4/NRN1/SOX9/MACF1/PARP2/FGF13/UNC13A/OLFM1/PLXNA3/MAP1B/DCLK1/NGF/EPHA7/SEMA4F/EMX1/KIAA0319/SEMA6D/ST8SIA2/IQGAP1/CPNE9/TMEM108/SLIT2/C9orf72/ITGB1/AKAP6/…	98	0.427948
GO:0043271	BP	GO:0043271	negative regulation of ion transport	74/6492	167/18903	0.00462973	0.0389124	0.0293226	HECW1/ATP1A2/GPM6B/KCNH2/WNK1/MAOB/GNB5/PTGS2/ACTN2/REM1/MMP9/HRH3/EPPIN/GABRE/HTR2A/CAV1/PPP3CB/PPIF/HES1/RGS2/CASQ2/PKD2/PPP3CC/SEMG1/OPRL1/WNK4/BEST3/EPO/SYT11/EPHB2/GRP/MTNR1B/HTR1B/ISCU/BIN1/OSR1/UBR3/SNCA/CAMK2D/VIP/SLC43A1/ADRA2A/KCNE4/CLIC2/STC1/ADORA1/C4orf3/NOS3/GEM/ATP7A/PACSIN3/PXK/PCSK9/KCNAB1/P2RY1/TCAF2/SLC26A5/TRH/PRKCE/BCL2/OXSR1/GPR35/ANO9/CYP4F2/SESTD1/GRM7/SLC6A9/PLN/STK39/CAL…	74	0.443114
GO:0001709	BP	GO:0001709	cell fate determination	24/6492	44/18903	0.00464976	0.0389124	0.0293226	PAX2/MEF2C/GATA3/HES1/PTCH2/PROX1/TBX2/NKX2-2/MYOD1/NOTCH2/KLF4/LBX1/GATA6/MCL1/WNT7A/SOX17/NKX6-3/MESP1/TNXB/FOXG1/DSCAML1/PTCH1/TRIM15/EBF2	24	0.545455
GO:0003009	BP	GO:0003009	skeletal muscle contraction	24/6492	44/18903	0.00464976	0.0389124	0.0293226	SLC8A3/DMPK/TNNT1/MYH3/TNNC1/NR4A1/TNNI3/TNNI2/CHRND/CHRNA1/STAC/TNNI1/CCDC78/JSRP1/CHRNB1/GAA/TCAP/SYNM/STAC3/RCSD1/DMD/GSTM2/KBTBD13/ACTN3	24	0.545455
GO:0045214	BP	GO:0045214	sarcomere organization	24/6492	44/18903	0.00464976	0.0389124	0.0293226	MYOM2/ACTN2/SIX4/TNNT1/PRKAR1A/MYH3/SRF/PROX1/TNNT2/LDB3/FLNC/FHOD3/MYPN/TPM1/ANKRD1/ITGB1/CSRP1/ANKRD23/CFL2/AKAP13/MYOZ2/TCAP/CSRP2/KLHL41	24	0.545455
GO:0061001	BP	GO:0061001	regulation of dendritic spine morphogenesis	24/6492	44/18903	0.00464976	0.0389124	0.0293226	PAFAH1B1/CAMK2B/ZDHHC15/EEF2K/EPHA4/KIF1A/EPHB2/ITPKA/ABI2/PPFIA2/LRP8/PDLIM5/CDK5/EFNA1/NLGN1/TANC2/PTEN/CFL1/CDK5R1/LRRK2/RELN/DNM3/ARC/SRCIN1	24	0.545455
GO:0071560	BP	GO:0071560	cellular response to transforming growth factor beta stimulus	114/6492	271/18903	0.00466831	0.0389723	0.0293677	ITGA3/FYN/ARID4A/HSPA5/LTBP1/DKK3/TGFBR3/FERMT2/ITGA8/MEF2C/NLK/FKBP1A/LTBP4/SIRT1/ABL1/BRMS1L/FERMT1/SMAD7/SFRP1/PDCD5/CAV1/WNT2/BMPR1A/PBLD/MTMR4/FOLR1/SOX6/DUSP22/NR3C1/ITGB6/ONECUT2/TGFB3/SMAD9/FMOD/GIPC1/PMEPA1/SOX9/BMP2/WFIKKN1/RASL11B/NFATC1/MEN1/SOX5/COL4A2/AMHR2/SPRY2/NKX2-1/LRRC32/SDCBP/THBS1/EMILIN1/CILP/FBN2/ACVRL1/PML/TGFB1I1/MYOCD/SMAD4/PRDM16/XCL1/DLX1/IL17RD/OGT/ZEB1/ANKRD1/LATS2/…	114	0.420664
GO:0016485	BP	GO:0016485	protein processing	106/6492	250/18903	0.00466896	0.0389723	0.0293677	PLAUR/BAK1/CYFIP2/RPS6KA2/ENO1/CST7/CPB2/P2RX7/APOH/CMA1/TLL2/PCSK5/CTSG/CTSZ/HM13/PCSK1N/PGK1/PHEX/PYCARD/RIPK2/COMP/HPN/CASP2/CPE/HGFAC/BAG2/MEP1A/BCHE/SPCS1/PCSK4/DHCR24/APH1A/F3/CPXM2/PLAU/SRGN/MYRF/PCSK2/BCL2L12/CHAC1/F12/CASP9/CIDEB/THBS1/ADAM10/CUZD1/CASP6/DHH/PCSK6/KLK3/PRKACB/RHBDD1/ECE2/CORIN/PLA2G7/OGT/GSN/ADAM8/ADAM17/CAST/DISP1/MMP16/TYSND1/MMP14/C1R/PCSK7/NCSTN/IHH/CPA3/CLEC3B/SHH/M…	106	0.424
GO:0021988	BP	GO:0021988	olfactory lobe development	20/6492	35/18903	0.0047213	0.0391778	0.0295225	ARX/ATP1A2/SEMA3A/EFNA2/SALL1/DLX5/OGDH/LHX2/NR2E1/SRF/ID2/DLX2/KIF14/FEZF1/SLIT2/ZIC1/SKI/ATF5/CHD7/LRRK2	20	0.571429
GO:0035633	BP	GO:0035633	maintenance of blood-brain barrier	20/6492	35/18903	0.0047213	0.0391778	0.0295225	ABCC8/VCL/PTGS2/ACTB/TJP1/LSR/LAMC1/IL6/ITGB1/ANGPT1/JAM2/F11R/CLDN1/CLDN3/JAM3/CDH5/CLDN5/LAMA2/DMD/PECAM1	20	0.571429
GO:0002902	BP	GO:0002902	regulation of B cell apoptotic process	14/6492	22/18903	0.00473525	0.0391778	0.0295225	BAX/IL2/BCL6/FOXP1/BLK/BCL10/BCL2/PTEN/AURKB/NOC2L/ADA/SLC39A10/MIF/LYN	14	0.636364
GO:0007620	BP	GO:0007620	copulation	14/6492	22/18903	0.00473525	0.0391778	0.0295225	P2RX1/TACR1/PI3/SEMG1/VGF/KLK14/EDNRB/VIP/AVPR1A/P2RY1/OXTR/EDDM3A/ADA/DDO	14	0.636364
GO:0051151	BP	GO:0051151	negative regulation of smooth muscle cell differentiation	14/6492	22/18903	0.00473525	0.0391778	0.0295225	PRDM6/NFATC3/PDGFB/NFATC2/FGF9/EREG/DNMT1/NFATC1/HEY2/PDCD4/SHH/RBPMS2/MECP2/FOXO4	14	0.636364
GO:0086012	BP	GO:0086012	membrane depolarization during cardiac muscle cell action potential	14/6492	22/18903	0.00473525	0.0391778	0.0295225	ATP1A2/HCN2/SCN1B/TRPM4/HCN4/ANK2/SCN2B/CACNA1C/CACNA2D1/SLMAP/CACNB2/SCN3B/SCN4B/SLC8A1	14	0.636364
GO:0060079	BP	GO:0060079	excitatory postsynaptic potential	57/6492	124/18903	0.00473597	0.0391778	0.0295225	MAPK8IP2/GABRA3/PRKCZ/RIMS1/MEF2C/P2RX7/SLC8A3/CELF4/GABRE/CBLN1/DMPK/GRIN2D/GRIK5/STX1A/P2RX1/MPP2/GABRA4/GABRG2/RAB3GAP1/SLC8A2/P2RX4/CHRND/CHRNA1/IGSF11/TMEM108/SNCA/GLRA3/CHRNA6/GABRA2/WNT7A/CHRNB2/GABRG1/ADORA1/GRIK2/CDK5/NETO1/MECP2/ADRB2/CHRNA5/NLGN1/CHRNB1/PTEN/CHRNA9/NPAS4/GRIN1/NRXN1/GABRR3/HTR3E/ZACN/GABRD/LRRK2/RELN/NLGN3/CHRNG/S1PR2/GABRQ/GRIN2B	57	0.459677
GO:0051058	BP	GO:0051058	negative regulation of small GTPase mediated signal transduction	30/6492	58/18903	0.00475106	0.0392524	0.0295788	ITGA3/MYOC/CUL3/SH3BP1/PPP2CB/RASA4/MET/KANK1/KCTD10/BCL6/MFN2/STMN1/TRIM67/ADRA1A/CGNL1/EPHB2/SPRY2/DAB2IP/ARHGAP24/SLIT2/ITGB1/ARHGAP35/SPRY1/DLC1/HEG1/KCTD13/RASA3/SYNGAP1/CD2AP/NUP62	30	0.517241
GO:0060425	BP	GO:0060425	lung morphogenesis	27/6492	51/18903	0.00478739	0.039439	0.0297194	FGF10/GRHL2/CTSZ/LAMA1/ESRP2/FOXF1/WNT2/PLOD3/FGF8/SRF/TCF21/TBX2/SOX9/LIF/WNT2B/SPRY2/NKX2-1/YAP1/FGF7/RSPO2/NFIB/TGFBR2/SPRY1/HHIP/SHH/SOX11/STK40	27	0.529412
GO:0060688	BP	GO:0060688	regulation of morphogenesis of a branching structure	27/6492	51/18903	0.00478739	0.039439	0.0297194	SOX8/HGF/FGF10/PAX2/SIRT6/ESR1/ABL1/SIX4/SFRP1/WNT2/MDK/SOX9/PAX8/SIX1/WNT2B/SULF1/FGF7/SHH/GREM1/GDNF/SHOX2/AR/MAGED1/LRRK2/FKBPL/HOXB7/LHX1	27	0.529412
GO:0048708	BP	GO:0048708	astrocyte differentiation	40/6492	82/18903	0.00480522	0.039439	0.0297194	SOX8/VIM/LAMC3/TREM2/ABL1/MAG/IFNG/NR2E1/HES1/ID2/EPHA4/LRP1/PLP1/SOX9/NKX2-2/BMP2/LIF/LDLR/TSPAN2/IL6ST/IL6/BIN1/TLR4/GCM1/NTRK3/S100A8/TTBK1/VAX1/SHH/STAT3/ROR2/LAMB2/ID4/PTPN11/F2/CNTN2/ROR1/MAPT/HES5/AGER	40	0.487805
GO:0051091	BP	GO:0051091	positive regulation of DNA-binding transcription factor activity	112/6492	266/18903	0.00484021	0.039439	0.0297194	KDM1A/DHX33/CX3CL1/ZIC2/TRAF1/PRKCZ/HDAC4/LRP6/CAMK2A/TCF3/TFRC/MID2/TRAF5/ERC1/IRAK3/ESR1/CD200/JAK2/SMARCB1/RPS6KA5/CD40LG/RGCC/TRADD/PYCARD/RIPK2/AMH/CAV1/WNT2/CSF3/HDAC5/PPARGC1A/RWDD1/SRF/OPRD1/TNFSF11/CLU/TRIM25/CAT/RBCK1/BMP2/TRAF2/SMARCA4/TICAM1/EDA2R/BEX1/NTS/CLOCK/IL6/TLR4/TLR2/CRTC3/MYOCD/BCL10/S100A8/EPHA5/PPRC1/ARID5B/FER/ADAM8/JMY/PPARGC1B/LRP8/KIT/EDA/PINK1/CRTC2/RPS6KA4/NLRP3/DDR2…	112	0.421053
GO:0001553	BP	GO:0001553	luteinization	9/6492	12/18903	0.00484071	0.039439	0.0297194	PTPRN/MMP2/INHBA/PDGFRA/NR5A1/SGPL1/STAT5B/FZD4/A2M	9	0.75
GO:0001886	BP	GO:0001886	endothelial cell morphogenesis	9/6492	12/18903	0.00484071	0.039439	0.0297194	MET/HOXA13/PLOD3/ARHGEF26/STC1/COL22A1/CLIC4/HEG1/COL18A1	9	0.75
GO:0019321	BP	GO:0019321	pentose metabolic process	9/6492	12/18903	0.00484071	0.039439	0.0297194	XYLB/DHDH/PGD/RPIA/G6PD/NUDT5/OTOGL/DCXR/RBKS	9	0.75
GO:0090232	BP	GO:0090232	positive regulation of spindle checkpoint	9/6492	12/18903	0.00484071	0.039439	0.0297194	MAD1L1/NDC80/BIRC5/XRCC3/CDCA8/INCENP/MAD2L1/GEN1/AURKB	9	0.75
GO:0090267	BP	GO:0090267	positive regulation of mitotic cell cycle spindle assembly checkpoint	9/6492	12/18903	0.00484071	0.039439	0.0297194	MAD1L1/NDC80/BIRC5/XRCC3/CDCA8/INCENP/MAD2L1/GEN1/AURKB	9	0.75
GO:0098911	BP	GO:0098911	regulation of ventricular cardiac muscle cell action potential	9/6492	12/18903	0.00484071	0.039439	0.0297194	DSG2/PKP2/CAV1/TRPM4/DSC2/BIN1/CACNA1C/CTNNA3/RYR2	9	0.75
GO:0099150	BP	GO:0099150	regulation of postsynaptic specialization assembly	9/6492	12/18903	0.00484071	0.039439	0.0297194	CBLN1/ARHGEF9/LRRC4B/NTRK3/LRRTM2/PTPRD/NPTX1/LRFN4/IL1RAP	9	0.75
GO:0048660	BP	GO:0048660	regulation of smooth muscle cell proliferation	77/6492	175/18903	0.00488944	0.0397859	0.0299808	CX3CL1/IGF1/ELN/CYBA/FOXJ2/PTGS2/NOTCH3/MEF2C/MMP2/JAK2/HMOX1/PDGFB/MMP9/FGF9/VIPR2/OGN/BMPR1A/PPARGC1A/IFNG/SOD2/HBEGF/NPR3/FOXP1/TACR1/STAT1/IGFBP5/ID2/MEF2D/MFN2/TNFAIP3/NR4A3/TGFB3/CDKN1A/EREG/BMP2/CNN1/DNMT1/HTR1B/IL6/TLR4/THBS1/FGF2/TPM1/MYOCD/VIP/IGFBP3/PDCD4/ADAMTS1/IL6R/DDR2/TGFBR2/TERT/GPER1/NOS3/RBPMS2/IL13/NPR1/PDGFD/S1PR1/APLN/P2RY6/PTEN/EFEMP2/TRIB1/JUN/CTNNBIP1/IRAK1/PRKG1/APOD/SRC…	77	0.44
GO:0019221	BP	GO:0019221	cytokine-mediated signaling pathway	198/6492	496/18903	0.00497056	0.0402714	0.0303466	SPPL2B/CX3CL1/PAFAH1B1/NLRP2/TRAF1/IL17RB/WNK1/CLDN18/CXCL2/IL12RB2/TRAF5/CYLD/OAS1/CDIP1/IRAK3/IL5RA/TREM2/SIRT1/JAK2/PDGFB/CTSG/RPS6KA5/NFKBIA/BIRC7/SAMHD1/TRADD/PYCARD/RIPK2/PPP2CB/NUMBL/TYK2/LILRB5/CAV1/CXCL12/CSF3/CCL7/CCL2/PF4V1/KRT18/OAS3/OAS2/IFNG/PTPN6/IL17A/CCR6/GHR/LIFR/IL1A/CCL20/STAT1/IL1RL1/LEPR/PADI2/MPL/F3/APOA1/TNFAIP3/FOXO3/TNFSF11/EGR1/CXCR4/FLT3/NMI/CXCL6/EREG/BBS2/IL37/CD70/I…	198	0.399194
GO:0000272	BP	GO:0000272	polysaccharide catabolic process	13/6492	20/18903	0.00498023	0.0402714	0.0303466	PYGM/PYGB/CHIT1/CHIA/GABARAPL1/PFKM/PHKG2/AGL/GAA/PPP1CA/PPP1R3B/INS/MGAM	13	0.65
GO:0003215	BP	GO:0003215	cardiac right ventricle morphogenesis	13/6492	20/18903	0.00498023	0.0402714	0.0303466	SMARCD3/PPP1R13L/GATA3/BMPR1A/HAND1/SOX4/HEY2/FOXH1/HAND2/TBX20/ZFPM2/CHD7/NKX2-5	13	0.65
GO:0035461	BP	GO:0035461	vitamin transmembrane transport	13/6492	20/18903	0.00498023	0.0402714	0.0303466	SCARB1/SLC46A1/LRP2/FOLR1/SLC19A2/SLC25A19/STRA6/SLC5A6/GC/FOLR2/SLC23A1/SLC19A1/SLC23A3	13	0.65
GO:0071371	BP	GO:0071371	cellular response to gonadotropin stimulus	13/6492	20/18903	0.00498023	0.0402714	0.0303466	GCLM/EPHA8/GATA1/SLC5A5/INHBA/PAX8/LHCGR/CYP1B1/GATA6/CCNA2/EDNRA/FSHR/WT1	13	0.65
GO:0006865	BP	GO:0006865	amino acid transport	66/6492	147/18903	0.00499266	0.0403215	0.0303844	SLC25A13/SLC6A13/SLC6A7/SLC38A5/SLC11A1/ATP1A2/SLC7A9/LLGL2/SLC1A3/P2RX7/HRH3/SLC25A15/SLC38A7/SLC7A6/SLC17A7/SLC1A6/APBA1/SLC6A12/SLC38A1/SLC16A10/RAB3GAP1/SLC25A12/SLC1A4/RGS2/KMO/SLC25A2/GIPC1/SLC6A6/SLC6A11/PER2/TRPC4/SLC38A2/HTR1B/STXBP1/SLC3A1/SLC38A4/SLC38A6/SFXN5/SNCA/SLC16A2/SLC43A1/ITGB1/SLC7A11/SFXN2/MFSD12/ADORA1/SLC6A20/SFXN1/SLC7A3/AVPR1A/SLC3A2/ARL6IP1/TRH/LRRC8D/SLC6A19/SLC38A9/SL…	66	0.44898
GO:0048863	BP	GO:0048863	stem cell differentiation	105/6492	248/18903	0.00510695	0.0407591	0.0307142	SEMA3F/MEOX1/SOX8/JARID2/SEMA3G/NSUN2/KITLG/LRP6/TCOF1/TP63/SEMA3A/PAX2/SIRT6/MEF2C/SLC4A11/TBX5/PUS7/ESR1/SEMA4G/ABL1/SFRP1/ERCC2/EZH2/BMPR1A/WNT3/PSMD11/FOLR1/SOX6/CORO1C/RBM24/SRF/FAM172A/HES1/NFE2L2/NRP2/PHF19/EPCAM/TBX2/RUNX2/SOX9/TCF15/SIX1/ZFP36/LIF/LIN28A/SOX5/PDGFRA/SEMA4F/SMYD5/HTR2B/EDNRB/YAP1/SEMA6D/FGF2/PRICKLE1/PDX1/MYOCD/GATA6/SMAD4/DMRTA2/MTF2/OSR1/SFRP2/FBXL17/HMGA2/ITGB1/GPM6A/E…	105	0.423387
GO:0007219	BP	GO:0007219	Notch signaling pathway	80/6492	183/18903	0.00513054	0.0407591	0.0307142	CNTN1/NRIP2/EPN1/FGF10/TP63/LLGL2/NLE1/NOTCH3/SLC35C2/DLL3/DTX2/MFNG/NFKBIA/ZNF423/LFNG/NEURL1/DTX4/IL17A/GMDS/CDH6/BCL6/PDCD10/HES1/DLX2/APH1A/CFAP58/TBX2/SNAI1/SOX9/BMP2/SIX1/CHAC1/KCNA5/GATA5/NR0B2/POSTN/NOTCH2/IL6ST/HEY2/ARRB1/YAP1/ADAM10/RITA1/DLX1/ADAM17/SORBS2/MMP14/KIT/NCSTN/TGFBR2/DTX3L/HEY1/NOS3/METTL3/TMEM100/MESP1/STAT3/MECP2/RFNG/ONECUT1/DLK2/EGFL7/TSPEAR/HES7/MAML2/MESP2/ANXA4/ARRDC…	80	0.437158
GO:0002467	BP	GO:0002467	germinal center formation	10/6492	14/18903	0.00515368	0.0407591	0.0307142	BCL3/MEF2C/UNC13D/BCL6/TNFAIP3/FOXJ1/RC3H1/ADAM17/CXCL13/ADA	10	0.714286
GO:0003188	BP	GO:0003188	heart valve formation	10/6492	14/18903	0.00515368	0.0407591	0.0307142	SOX9/OLFM1/HEY2/SMAD4/TBX20/HEY1/DCHS1/EFNA1/ZFPM1/SCX	10	0.714286
GO:0006177	BP	GO:0006177	GMP biosynthetic process	10/6492	14/18903	0.00515368	0.0407591	0.0307142	IMPDH1/PAICS/PPAT/ADK/GART/GMPS/HPRT1/PFAS/ADA/APRT	10	0.714286
GO:0035563	BP	GO:0035563	positive regulation of chromatin binding	10/6492	14/18903	0.00515368	0.0407591	0.0307142	KDM1A/DDX11/MED25/GMNN/PARP9/ZNF618/PYGO2/DTX3L/CDT1/EBF2	10	0.714286
GO:0055012	BP	GO:0055012	ventricular cardiac muscle cell differentiation	10/6492	14/18903	0.00515368	0.0407591	0.0307142	MEF2A/RARB/MEF2C/PROX1/RARA/HEY2/MYOCD/LMNA/CDK1/NKX2-5	10	0.714286
GO:0010522	BP	GO:0010522	regulation of calcium ion transport into cytosol	12/6492	18/18903	0.00516006	0.0407591	0.0307142	BAK1/ADCYAP1R1/BAX/P2RX7/CAV1/EPO/P2RX4/LHCGR/TRPC3/PML/BCL2/GRIN1	12	0.666667
GO:0033033	BP	GO:0033033	negative regulation of myeloid cell apoptotic process	12/6492	18/18903	0.00516006	0.0407591	0.0307142	KITLG/APOH/GATA1/EPO/ITPKB/BCL2/STAT5B/CXCR2/GAS6/IRF7/MIF/CLEC5A	12	0.666667
GO:0034501	BP	GO:0034501	protein localization to kinetochore	12/6492	18/18903	0.00516006	0.0407591	0.0307142	CENPQ/SPDL1/NDC80/TTK/BUB3/CDT1/CDK1/MTBP/ZWILCH/AURKB/RCC2/KNTC1	12	0.666667
GO:0048486	BP	GO:0048486	parasympathetic nervous system development	12/6492	18/18903	0.00516006	0.0407591	0.0307142	SEMA3F/HES1/NRP2/EGR2/SIX1/PLXNA3/TFAP2A/ACKR3/GDNF/TBX1/ADARB1/PLXNA4	12	0.666667
GO:0048569	BP	GO:0048569	post-embryonic animal organ development	12/6492	18/18903	0.00516006	0.0407591	0.0307142	BAK1/BAX/JAK2/EFEMP1/MFAP2/KDR/KLF4/MYO7A/BCL2L11/FZD5/FBN1/HMGN1	12	0.666667
GO:0051770	BP	GO:0051770	positive regulation of nitric-oxide synthase biosynthetic process	12/6492	18/18903	0.00516006	0.0407591	0.0307142	MAP2K3/JAK2/NAMPT/CCL2/IFNG/STAT1/KDR/AKAP12/TLR4/IL33/TLR2/LRRK2	12	0.666667
GO:0051782	BP	GO:0051782	negative regulation of cell division	12/6492	18/18903	0.00516006	0.0407591	0.0307142	ASPM/ORC6/SUSD2/E2F8/MYC/CHMP4C/E2F7/ZFYVE19/AURKB/PTCH1/BLM/TXNIP	12	0.666667
GO:0090190	BP	GO:0090190	positive regulation of branching involved in ureteric bud morphogenesis	12/6492	18/18903	0.00516006	0.0407591	0.0307142	SOX8/PAX2/SIX4/SOX9/PAX8/SIX1/WNT2B/GREM1/GDNF/MAGED1/HOXB7/LHX1	12	0.666667
GO:1903083	BP	GO:1903083	protein localization to condensed chromosome	12/6492	18/18903	0.00516006	0.0407591	0.0307142	CENPQ/SPDL1/NDC80/TTK/BUB3/CDT1/CDK1/MTBP/ZWILCH/AURKB/RCC2/KNTC1	12	0.666667
GO:1904872	BP	GO:1904872	regulation of telomerase RNA localization to Cajal body	12/6492	18/18903	0.00516006	0.0407591	0.0307142	DKC1/NAF1/CCT6A/CCT5/CCT8/CCT3/CCT2/EXOSC10/DCP2/RUVBL1/NOP10/RUVBL2	12	0.666667
GO:0071559	BP	GO:0071559	response to transforming growth factor beta	116/6492	277/18903	0.00516208	0.0407591	0.0307142	ITGA3/FYN/ARID4A/HSPA5/LTBP1/DKK3/ROCK1/TGFBR3/FERMT2/ITGA8/MEF2C/NLK/FKBP1A/LTBP4/SIRT1/ABL1/BRMS1L/FERMT1/SMAD7/SFRP1/PDCD5/CAV1/WNT2/BMPR1A/PBLD/MTMR4/FOLR1/SOX6/DUSP22/NR3C1/ITGB6/ONECUT2/TGFB3/SMAD9/FMOD/GIPC1/PMEPA1/SOX9/BMP2/WFIKKN1/RASL11B/NFATC1/MEN1/ROCK2/SOX5/COL4A2/AMHR2/SPRY2/NKX2-1/LRRC32/SDCBP/THBS1/EMILIN1/CILP/FBN2/ACVRL1/PML/TGFB1I1/MYOCD/SMAD4/PRDM16/XCL1/DLX1/IL17RD/OGT/ZEB1/A…	116	0.418773
GO:0009913	BP	GO:0009913	epidermal cell differentiation	100/6492	235/18903	0.00517519	0.0407591	0.0307142	WNT16/PAFAH1B1/NME2/OPN3/MCOLN3/CDH3/DLX3/ROCK1/TP63/FOSL2/GRHL2/TGM1/FA2H/ESRP1/ERCC2/CASP14/OVOL3/CNFN/EZH2/CYP27B1/GLI1/HES1/IL1A/ERRFI1/MYCL/PTCH2/KLF7/PPL/CSTA/EREG/ZFP36/PALLD/SPINK5/ROCK2/ANXA1/KRT85/KRT7/HEY2/KLF4/MYO7A/YAP1/FGF2/KRT71/GATA6/EPHA2/S100A7/ABCA12/UGCG/ST14/LATS2/TCHH/SPRR2G/IVL/SPRR2D/PITX2/AQP3/KLK5/DNASE1L2/SPRR1B/SPRR1A/CLIC4/KRT8/KRT78/KRT86/KRT75/KRT6C/KRT74/KRT83/OVOL…	100	0.425532
GO:0120192	BP	GO:0120192	tight junction assembly	37/6492	75/18903	0.0051768	0.0407591	0.0307142	CLDN18/ROCK1/GRHL2/OCEL1/TJP1/LSR/MPDZ/IL17A/SRF/ECT2/SNAI1/RAMP2/NPHP4/EPHB2/ROCK2/APC/MARVELD3/EPHA2/NPHP1/PARD3/MPP7/F11R/CLDN14/FZD5/CLDN1/MICALL2/CLDN3/CLDN2/CDH5/GPBAR1/CLDN5/CLDN6/CLDN24/CLDN4/MYO1C/CLDN9/PECAM1	37	0.493333
GO:0021772	BP	GO:0021772	olfactory bulb development	19/6492	33/18903	0.00522062	0.0407591	0.0307142	ARX/SEMA3A/EFNA2/SALL1/DLX5/OGDH/LHX2/NR2E1/SRF/ID2/DLX2/KIF14/FEZF1/SLIT2/ZIC1/SKI/ATF5/CHD7/LRRK2	19	0.575758
GO:0045907	BP	GO:0045907	positive regulation of vasoconstriction	19/6492	33/18903	0.00522062	0.0407591	0.0307142	PTGS2/ABL1/HTR2A/CAV1/TACR1/FAAH/ADRA1A/AVPR2/TRPM4/AVPR1A/FGG/FGA/FGB/ADRA1D/CYSLTR1/OXTR/F2R/SMTNL2/SMTNL1	19	0.575758
GO:0061842	BP	GO:0061842	microtubule organizing center localization	19/6492	33/18903	0.00522062	0.0407591	0.0307142	PAFAH1B1/ASPM/PLXNA2/AURKA/EZR/IFT20/PARD3B/GPSM2/DLGAP5/DYNC1LI2/FHOD1/PARD3/RANBP2/ARPC5/CCDC141/MAD2L1/NDEL1/KIF5B/CEP83	19	0.575758
GO:0006825	BP	GO:0006825	copper ion transport	11/6492	16/18903	0.00523587	0.0407591	0.0307142	FKBP4/CP/HEPH/STEAP3/CUTC/STEAP4/SLC31A2/COX17/ATP7A/MMGT1/HEPHL1	11	0.6875
GO:0021535	BP	GO:0021535	cell migration in hindbrain	11/6492	16/18903	0.00523587	0.0407591	0.0307142	CTNNA2/PLXNA2/TTBK2/ATP1B2/EPHB2/RERE/ITGB1/POU4F1/EPHB1/NHLH2/CEND1	11	0.6875
GO:0021783	BP	GO:0021783	preganglionic parasympathetic fiber development	11/6492	16/18903	0.00523587	0.0407591	0.0307142	SEMA3F/HES1/NRP2/EGR2/SIX1/PLXNA3/TFAP2A/ACKR3/TBX1/ADARB1/PLXNA4	11	0.6875
GO:0034112	BP	GO:0034112	positive regulation of homotypic cell-cell adhesion	11/6492	16/18903	0.00523587	0.0407591	0.0307142	PLAUR/GP6/JAK2/CTSG/TNFSF11/IL6ST/IL6/MMRN1/F11R/JAK1/MFSD2B	11	0.6875
GO:0048532	BP	GO:0048532	anatomical structure arrangement	11/6492	16/18903	0.00523587	0.0407591	0.0307142	SEMA3F/HSPA5/PAX2/BMPR1A/KIF14/NRP2/EGR2/PLXNA3/TFAP2A/KCNA2/PLXNA4	11	0.6875
GO:0051447	BP	GO:0051447	negative regulation of meiotic cell cycle	11/6492	16/18903	0.00523587	0.0407591	0.0307142	RPS6KA2/TRIP13/FBXO5/TTK/DUSP1/LIF/DMRT1/HORMAD1/FBXO43/NPR2/OVOL1	11	0.6875
GO:2000095	BP	GO:2000095	regulation of Wnt signaling pathway, planar cell polarity pathway	11/6492	16/18903	0.00523587	0.0407591	0.0307142	MKS1/ABL1/SPEF1/SFRP1/PLEKHA4/DKK1/ANKRD6/NKD1/SFRP2/RSPO3/DACT1	11	0.6875
GO:0001704	BP	GO:0001704	formation of primary germ layer	58/6492	127/18903	0.00524236	0.0407606	0.0307153	ITGA3/LAMA3/COL11A1/PAX2/ITGA8/MMP2/MMP9/MMP15/FOXF1/EYA1/BMPR1A/DKK1/WNT3/PRKAR1A/COL12A1/SRF/HAND1/COL7A1/TLX2/WLS/MMP8/DUSP1/DUSP4/INHBA/SNAI1/AHDC1/ITGB4/KDM6B/COL4A2/ITGA7/KLF4/DUSP5/GATA6/COL6A1/EPHA2/TBX19/SFRP2/CRB2/HMGA2/ITGB1/FZD7/MMP14/ETS2/DUSP2/ITGA5/TBX20/SOX17/MESP1/SOX7/MESP2/TXNRD1/BMPR2/POU5F1/TRIM15/APELA/ITGB3/SCX/LHX1	58	0.456693
GO:0043500	BP	GO:0043500	muscle adaptation	56/6492	122/18903	0.0052766	0.0409776	0.0308788	GTF2IRD1/JARID2/IGF1/MYOC/CYBA/CAMK2B/ATP2B4/ROCK1/HDAC4/MEF2A/LMCD1/HMOX1/TNNT1/EZH2/CAMTA2/SGCA/TNNC1/FOXP1/IGFBP5/ERRFI1/RGS2/FOXO3/NR4A3/ADRA1A/MYOD1/PARP2/GATA5/ROCK2/IL6ST/P2RX4/HEY2/PDE5A/TRPC3/GATA6/SMAD4/ACTA1/CAMK2D/MLIP/GSN/CAMK2G/FOXO1/AKAP6/PRKCA/FBXO32/TRIM63/TNNI1/G6PD/LMNA/KLF15/HAND2/PI16/NOS3/MYOZ2/TCAP/PPARA/ACTN3	56	0.459016
GO:2000630	BP	GO:2000630	positive regulation of miRNA metabolic process	29/6492	56/18903	0.00533687	0.041396	0.0311941	SREBF1/PDGFB/GATA3/BMPR1A/NFKB1/SRF/NR3C1/MYB/FOXO3/EGR1/BMP2/SMARCA4/ETS1/KLF4/MYC/PNPT1/FGF2/MYOCD/SMAD4/TERT/STAT3/FOS/APLN/HRAS/FOSL1/JUN/WT1/TEAD1/LIN28B	29	0.517857
GO:0003044	BP	GO:0003044	regulation of systemic arterial blood pressure mediated by a chemical signal	26/6492	49/18903	0.00536945	0.0415988	0.0313469	CYBA/RPS6KA2/CMA1/PCSK5/CTSG/CTSZ/SOD2/PDE4D/TACR1/ADRA1A/AVPR2/EDNRB/TPM1/AGTR1/CORIN/CPA3/NOS3/AVPR1A/ADRB2/DRD5/ADRA1D/HSD11B2/OXTR/F2R/ADRB3/SUCNR1	26	0.530612
GO:0001890	BP	GO:0001890	placenta development	67/6492	150/18903	0.00544228	0.0421125	0.031734	PKD1/CUL7/PRDM1/DLX3/DAZAP1/PTGS2/GRHL2/NCOA1/TMED2/CCDC134/PDGFB/WNT2/LHX3/CYP27B1/BMP5/MDFI/TFEB/HAND1/HES1/ASH1L/PKD2/SPP1/LHX4/SNAI1/LIF/E2F8/PARP2/TRIM28/MEN1/NOTCH2/HEY2/GCM1/TTPA/PLK4/RSPO3/NSDHL/ST14/DEDD/STC1/TPPP3/CCNF/FZD5/TCF23/CSF2/CITED2/HEY1/GJB2/CDX2/E2F7/SPINT1/IGF2/SPINT2/PLAC1/JUNB/FOSL1/PHLDA2/TEX19/ASCL2/SOCS3/ZFP36L1/EPOR/MME/ADA/BMPR2/ANG/CEBPA/APELA	67	0.446667
GO:0038034	BP	GO:0038034	signal transduction in absence of ligand	34/6492	68/18903	0.00552113	0.04257	0.0320787	CX3CL1/BAK1/KITLG/ERBB3/FGF10/FGFR1/BAX/SRPX/GATA1/EYA1/CASP2/UNC5B/IL2/EYA4/IL1A/FOXO3/INHBA/IFI6/BCL2L2/COL2A1/MCL1/BAG3/BCL2L11/TERT/CSF2/MOAP1/FADD/GDNF/BCL2L1/BCL2/PPP1CA/BOK/WWOX/HSPA1B	34	0.5
GO:0043550	BP	GO:0043550	regulation of lipid kinase activity	34/6492	68/18903	0.00552113	0.04257	0.0320787	PPP2R5A/EPHA8/RBL1/PDGFB/EEF1A2/RBL2/PIK3R2/WDR91/CD81/TEK/SOCS2/FLT3/VAV3/PDGFRA/AGAP2/DAB2IP/FGF2/PIK3R1/DGKZ/PIP4K2A/KIT/VAV2/PIP4K2C/IRS1/P2RY12/SOCS5/CCL19/CD19/F2/TNFAIP8L3/PRKD1/SOCS3/SRC/LYN	34	0.5
GO:0097192	BP	GO:0097192	extrinsic apoptotic signaling pathway in absence of ligand	34/6492	68/18903	0.00552113	0.04257	0.0320787	CX3CL1/BAK1/KITLG/ERBB3/FGF10/FGFR1/BAX/SRPX/GATA1/EYA1/CASP2/UNC5B/IL2/EYA4/IL1A/FOXO3/INHBA/IFI6/BCL2L2/COL2A1/MCL1/BAG3/BCL2L11/TERT/CSF2/MOAP1/FADD/GDNF/BCL2L1/BCL2/PPP1CA/BOK/WWOX/HSPA1B	34	0.5
GO:0071496	BP	GO:0071496	cellular response to external stimulus	135/6492	328/18903	0.00562337	0.0433066	0.0326339	AOC1/PDK4/PDK2/MAP3K14/ATP1A2/RRAGD/BAK1/HSPA5/CYBA/KIF26A/ASNS/SREBF1/PTGS2/NUAK1/NCOA1/P2RX7/COMT/MAP3K1/SIRT1/PICK1/HMOX1/SUV39H1/PHEX/SFRP1/GSDMD/MAG/CASP2/NUDT1/PRKAG2/TBL2/NFKB1/FOLR1/CYP27B1/LTBR/TFEB/SRF/DAP/CPEB4/NPRL2/NFE2L2/GADD45A/KPTN/FOXO3/TRIM24/CDKN1A/SOX9/FOXA2/MYOD1/HABP4/PRKAB2/MYBBP1A/POSTN/WNT2B/SLC38A2/DSC2/GLUL/NUDT15/BRIP1/TLR4/IL33/PIM1/CASP5/FGF2/GABARAPL1/SLC39A5/MYOCD/…	135	0.411585
GO:0045995	BP	GO:0045995	regulation of embryonic development	43/6492	90/18903	0.00569834	0.0437798	0.0329904	PAFAH1B1/PHLDB1/LAMA3/CLASP1/HNF4A/LAMA1/TLE6/TFPT/WNT2/KAT2A/LAMA4/TBX18/KAT2B/HES1/NFE2L2/RBM19/FOXA2/ZBED3/WNT2B/ACTL6A/TDG/OSR1/PHLDB2/SFRP2/CRB2/TENM4/CCSAP/B4GALT5/RACGAP1/HESX1/YEATS2/SOX17/OTX2/CDK1/CFL1/RUVBL1/PHLDA2/PLCB1/RUVBL2/WDR5/LAMA2/SCX/LHX1	43	0.477778
GO:0051591	BP	GO:0051591	response to cAMP	43/6492	90/18903	0.00569834	0.0437798	0.0329904	KDM1A/HSPA5/SREBF1/RAPGEF3/SLC26A3/EZR/HCN2/GATA1/EEF2K/AQP9/SLC5A5/AREG/STAT1/IGFBP5/RAP1A/PKD2/FOSB/VGF/CDO1/PNPT1/CYP1B1/HCN4/GATA6/PKLR/HCN3/CNGA3/SRD5A1/CRHBP/AKAP6/PPARGC1B/PFKFB1/STC1/INHBB/FOS/FOSL1/PER1/PENK/SLC8A1/WT1/ZFP36L1/PDE2A/SLC26A6/AQP1	43	0.477778
GO:0001667	BP	GO:0001667	ameboidal-type cell migration	196/6492	492/18903	0.00572207	0.0439099	0.0330885	SEMA3F/SOX8/ITGA3/PAFAH1B1/SEMA3G/PIK3C2A/ANLN/DCN/MAP2K3/KITLG/ATP2B4/ROCK1/PFN2/FGF10/SCARB1/PTGS2/CLASP1/SEMA3A/FGFR1/FAP/TNS1/MEF2C/APOH/EPB41L4B/SEMA4G/SIRT1/ABL1/SH3BP1/HMOX1/PDGFB/MMP9/FERMT1/RGCC/SYDE1/MEGF8/HAS1/MET/MEOX2/KANK1/ZFAND5/GATA3/ACTA2/FGF8/HDAC5/FOLR1/CORO1C/IFNG/SASH1/NR2E1/SMOC2/SRF/HBEGF/ARSB/HRG/AMOTL2/PDCD10/HYAL1/FOXP1/TACR1/NFE2L2/LAMTOR2/GADD45A/AKT3/PROX1/APOA1/NRP2/…	196	0.398374
GO:0098901	BP	GO:0098901	regulation of cardiac muscle cell action potential	18/6492	31/18903	0.00576218	0.0441654	0.033281	DSG2/PKP2/HCN2/CAV1/TBX18/FGF13/TRPM4/DSC2/BIN1/HCN4/HCN3/CAMK2D/ANK2/CACNA1C/CXADR/CTNNA3/RYR2/CALM1	18	0.580645
GO:0045785	BP	GO:0045785	positive regulation of cell adhesion	193/6492	484/18903	0.0057899	0.0442677	0.0333581	ITGA3/CX3CL1/SELE/FYN/PLAUR/CD6/IGF1/IBSP/MYOC/KITLG/PTPRU/SMARCD1/PRKCZ/ROCK1/CBFB/LIMS2/TFRC/FERMT2/GLI2/ACTB/SMARCA2/SMARCD3/COL16A1/GP6/CHRD/CCDC80/UNC13D/EPB41L4B/JAK2/ABL1/SMARCB1/PDGFB/CTSG/FERMT1/SMAD7/LAMA1/CD40LG/FOXF1/PYCARD/CD276/TJP1/RIPK2/SFRP1/IL4I1/TYK2/PIK3R2/CAV1/ECM2/GATA3/CXCL12/MAP3K8/SMARCD2/CCL2/IL2/ZBTB16/CD5/MDK/CD81/IL23A/IFNG/PTPN6/NEDD9/HRG/BCL6/HES1/HYAL1/HHLA2/CSPG5/…	193	0.39876
GO:0032465	BP	GO:0032465	regulation of cytokinesis	45/6492	95/18903	0.00579607	0.0442677	0.0333581	KLHL13/CUL3/CDC14B/AURKA/BIRC5/CDC6/CDC25B/AURKC/FSD1/GIT1/KIF20A/ECT2/CHMP3/KIF14/CIT/GIPC1/E2F8/RAB11FIP4/CDCA8/KIF13A/KIF23/KIF20B/BRCA2/PLK4/ANKRD53/INCENP/RACGAP1/KLHL21/CHMP4C/E2F7/ZFYVE19/PLK1/DCDC1/PRKCE/BCL2L1/PLK3/AURKB/RXFP3/PLK5/SVIL/CALM1/PRC1/NUP62/PDXP/MYO19	45	0.473684
GO:1901606	BP	GO:1901606	alpha-amino acid catabolic process	45/6492	95/18903	0.00579607	0.0442677	0.0333581	NOS2/AASS/OTC/ATP2B4/OAT/ACAT1/ARG2/GCAT/AHCY/CRYM/IL4I1/BCAT2/ASPA/AADAT/HGD/KYNU/KMO/ALDH6A1/GAD1/CDO1/IDO1/MCCC2/SCLY/GLUL/CSAD/HMGCLL1/ADHFE1/MAT1A/TDO2/HPD/ALDH4A1/CBS/HAAO/NOS3/GPT2/GPT/GLDC/PIPOX/SHMT2/SLC25A21/AFMID/ARHGAP11B/ACADSB/TAT/DDO	45	0.473684
GO:0030865	BP	GO:0030865	cortical cytoskeleton organization	31/6492	61/18903	0.00580876	0.0443123	0.0333917	PAFAH1B1/ANLN/AKAP11/EHD2/NCKAP1/ROCK1/LLGL2/EPB41L2/EPB41L3/PPP2R3C/EZR/RND2/ECT2/RTKN/RND3/RHOQ/NCKAP1L/VIL1/ROCK2/FHOD3/FHOD1/TLN1/RHOB/RACGAP1/CDK5/RHOH/RAC3/NLGN1/RND1/RHOD/CALR	31	0.508197
GO:0018210	BP	GO:0018210	peptidyl-threonine modification	55/6492	120/18903	0.0058788	0.0447938	0.0337545	WNK1/ROCK1/CAMK2A/CAD/NLK/GALNT16/MYLK2/SMAD7/CEMIP/RIPK2/DYRK1B/PRKAG2/HIPK3/TTK/GALNT3/CIT/DYRK2/MAP3K10/CHI3L1/ROCK2/SPRY2/GALNT1/RPTOR/DYRK3/GALNT2/CDC42BPA/CAMK2D/TTBK1/PARD3/CHEK1/PRKCA/HIPK4/HIPK1/EOGT/TGFBR2/CDK5/SPRED1/PLK1/DDIT4/CDK1/BCL2/OXSR1/GALNTL6/SPHK1/CDK5R1/PRKD1/CDK10/SBK1/LRRK2/STK39/CALM1/CDC42BPB/CSNK2B/PRKDC/S1PR2	55	0.458333
GO:0110149	BP	GO:0110149	regulation of biomineralization	49/6492	105/18903	0.00590044	0.0448413	0.0337903	GPM6B/ROCK1/MEF2C/P2RX7/GATA1/COMP/BMPR1A/CYP27B1/MGP/FBXO5/ACVR2B/WNT6/TGFB3/SRGN/SOX9/BMP2/OMD/TRPM4/ENAM/ROCK2/HEY2/TFAP2A/MMP20/BMPR1B/FBN2/ECM1/OSR1/AHSG/DMP1/DDR2/PKDCC/SGMS2/HEY1/NOS3/GREM1/LTBP3/ADRB2/S1PR1/ANO6/SLC8A1/GAS6/TMEM119/ISG15/AMTN/FZD9/ENPP1/BMPR2/IFITM5/ACTN3	49	0.466667
GO:1901655	BP	GO:1901655	cellular response to ketone	49/6492	105/18903	0.00590044	0.0448413	0.0337903	SPHK2/ADCY2/TFAP4/SIRT1/JAK2/PCK2/SFRP1/SLC5A5/RECQL5/UCP1/RWDD1/NR3C1/ERRFI1/SGK1/FOXO3/SPP1/KLF9/PTGFR/KLF2/GNAI1/SERPINF1/CASP9/POSTN/ROCK2/CDK4/CYP1B1/METTL21C/ADAM15/SRD5A1/FBXO32/PRKAA2/GJB2/SCNN1G/DDIT4/UGT3A2/AR/FOS/PRKCE/PTGER4/P2RY6/ADCY5/NPAS4/GAS6/SMYD3/GNG2/NDOR1/SRC/AQP1/NCOA4	49	0.466667
GO:0032414	BP	GO:0032414	positive regulation of ion transmembrane transporter activity	53/6492	115/18903	0.00590583	0.0448413	0.0337903	ABCC8/EHD3/WNK1/GAL/CACNG4/ACTN2/ABCB1/TREM2/PPP3CB/CCL2/KCNA1/IFNG/PKD2/PPP3CC/WNK4/HSPA2/ATP1B2/RGN/EPHB2/TRPC6/COX17/STAC/ANK2/JPH2/AKAP6/EDNRA/CNKSR3/CACNA2D1/RNF207/PINK1/IFNGR2/CDK5/CACNB2/STIM1/CACNB3/ADRB2/KCNK3/P2RY6/HAP1/PDZK1/AMIGO1/CACNB4/GALR2/LRRC26/STAC3/RELN/NLGN3/ARC/RYR2/STK39/CALM1/DMD/GSTM2	53	0.46087
GO:1904035	BP	GO:1904035	regulation of epithelial cell apoptotic process	51/6492	110/18903	0.00591396	0.0448504	0.0337972	BAX/ESR1/JAK2/ABL1/HMOX1/CD40LG/RGCC/FGF21/GATA3/CCL2/WFS1/MDK/NFE2L2/CD160/TNFAIP3/FOXO3/TEK/ZFP36/KDR/PAK4/RAMP2/IL6/YAP1/THBS1/PDX1/GSN/PDCD4/CAST/ANGPT1/HAND2/TERT/GPER1/IL13/FGG/FGA/FGB/BCL2/SCG2/NDNF/CD248/BTC/BOK/ANO6/UMODL1/CDH5/NKX2-5/GAS6/ZFP36L1/PPARA/HLA-G/ECSCR	51	0.463636
GO:0072523	BP	GO:0072523	purine-containing compound catabolic process	28/6492	54/18903	0.00599668	0.0454245	0.0342298	ENPP4/ACAT1/ACOT7/SAMHD1/AHCY/MLYCD/NUDT1/DNPH1/PDE4D/NT5C1A/NUDT10/NT5C/ITPA/SUCLA2/NUDT15/PDE5A/NUDT7/XDH/HPRT1/NUDT8/PDE7B/PDE4B/PDE2A/ADA/FITM2/NUDT16/PDE7A/NUDT19	28	0.518519
GO:0001774	BP	GO:0001774	microglial cell activation	25/6492	47/18903	0.0060232	0.0454657	0.0342608	CX3CL1/CST7/TREM2/JAK2/CTSC/IFNG/MMP8/CLU/LDLR/SYT11/IL6/IL33/TLR2/SNCA/TTBK1/ATM/IFNGR2/TLR3/CX3CR1/IL13/SPHK1/JUN/MAPT/LRRK2/AGER	25	0.531915
GO:0090199	BP	GO:0090199	regulation of release of cytochrome c from mitochondria	25/6492	47/18903	0.0060232	0.0454657	0.0342608	PLAUR/BID/IGF1/HGF/BAK1/BAX/MMP9/PYCARD/BMF/PDCD5/BBC3/PPIF/CLU/BCL2L2/HRK/CIDEB/BCL2L11/PINK1/LMNA/GPER1/MOAP1/TRIAP1/BCL2L1/MLLT11/GPX1	25	0.531915
GO:1902895	BP	GO:1902895	positive regulation of miRNA transcription	25/6492	47/18903	0.0060232	0.0454657	0.0342608	SREBF1/PDGFB/GATA3/BMPR1A/SRF/NR3C1/MYB/FOXO3/EGR1/BMP2/SMARCA4/ETS1/KLF4/MYC/FGF2/MYOCD/SMAD4/TERT/STAT3/FOS/APLN/FOSL1/JUN/WT1/TEAD1	25	0.531915
GO:0045913	BP	GO:0045913	positive regulation of carbohydrate metabolic process	38/6492	78/18903	0.00605358	0.0455886	0.0343534	IGF1/DGAT2/ADCYAP1R1/P2RX7/SORBS1/SIRT1/PDGFB/HTR2A/GAPDHS/KAT2A/NFKB1/PPARGC1A/IFNG/KAT2B/SLC25A12/DYRK2/MAS1/RGN/LHCGR/RPTOR/SNCA/FOXO1/PHKG2/SLC45A3/PTH1R/PRKAA2/GPER1/IGF2/GPT/IRS1/P2RY1/PRKCE/P2RY6/PPARA/WDR5/SRC/ACTN3/INS	38	0.487179
GO:0051966	BP	GO:0051966	regulation of synaptic transmission, glutamatergic	38/6492	78/18903	0.00605358	0.0455886	0.0343534	MAPK8IP2/ATP1A2/PTGS2/CACNG4/OPHN1/MEF2C/HTR2A/GRIN2D/DKK1/CCL2/RAB3GAP1/KMO/TSHZ3/GRM4/UNC13A/SLC38A2/HTR1B/GLUL/STXBP1/DGKZ/DGKI/ADORA1/UCN/GRIK3/GRIK2/CDK5/ROR2/NLGN1/GRIN1/NRXN1/OXTR/CLN3/LRRK2/RELN/GRM7/NLGN3/GRM3/GRIN2B	38	0.487179
GO:0055123	BP	GO:0055123	digestive system development	64/6492	143/18903	0.00614358	0.0462126	0.0348237	PKD1/OTC/PRDM1/CLDN18/FGF10/TP63/GLI2/RARB/PCSK5/FGF9/FOXF1/SALL1/SFRP1/MEGF8/HOXA13/NKX3-2/GLI1/HES1/ACVR2B/ID2/WLS/TCF21/TGFB3/NKX2-3/SFRP5/TBX2/SOX9/NKX2-2/GATA5/HIP1R/PYY/BARX1/IL6ST/PDGFRA/EDNRB/YAP1/STRA6/PDX1/CYP1A1/MYOCD/GATA6/SFRP2/PDGFC/KIT/GIP/PKDCC/FZD5/IHH/TGFBR2/SHH/SOX17/CDX2/DACT1/CLMP/DCHS1/RBPMS2/IGF2/SHOX2/BCL2/SOX11/TYMS/OXTR/ADA/SRC	64	0.447552
GO:0006096	BP	GO:0006096	glycolytic process	40/6492	83/18903	0.00624221	0.0468455	0.0353006	IGF1/PKM/HDAC4/ENO1/SIRT6/P2RX7/PGK1/HTR2A/GAPDHS/OGDH/PRKAG2/GIT1/GALK1/IFNG/GAPDH/TPI1/CBFA2T3/ALDOB/NCOR1/RPTOR/FOXK2/PKLR/OGT/PFKM/HKDC1/HK1/PFKFB1/ADPGK/HK2/SLC2A6/HK3/PRKAA2/DDIT4/STAT3/BPGM/DHTKD1/PPARA/EIF6/ACTN3/INS	40	0.481928
GO:0055013	BP	GO:0055013	cardiac muscle cell development	40/6492	83/18903	0.00624221	0.0468455	0.0353006	IGF1/MEF2A/ACTN2/TBX5/ASB2/BMPR1A/BVES/SRF/TBX18/FOXP1/RGS2/PROX1/ADRA1A/PARP2/MYH11/MYO18B/FHOD3/PDGFRA/HEY2/ALPK3/SMAD4/AKAP6/SORBS2/CXADR/ACTC1/G6PD/LMNA/SGCB/PDLIM5/PI16/SHOX2/CDK1/SGCD/AKAP13/TCAP/SLC8A1/NKX2-5/NEB/PPARA/ALPK2	40	0.481928
GO:0043949	BP	GO:0043949	regulation of cAMP-mediated signaling	17/6492	29/18903	0.00634553	0.0475107	0.0358018	ADCYAP1R1/SCTR/CDC34/RASD2/PDE4D/PEX5L/OPRL1/GNAI1/PDE3B/GPR61/GIP/UCN/PDE3A/GPR3/FFAR4/PDE2A/LPAR1	17	0.586207
GO:0097421	BP	GO:0097421	liver regeneration	17/6492	29/18903	0.00634553	0.0475107	0.0358018	CPB2/AURKA/HMOX1/SRSF5/EZH2/CCND1/GLI1/RGN/PCNA/IL6/PNPT1/SERPINA10/CLDN1/IHH/UCP2/TYMS/PTCH1	17	0.586207
GO:0035023	BP	GO:0035023	regulation of Rho protein signal transduction	42/6492	88/18903	0.00638576	0.0477566	0.0359872	ITGA3/RALBP1/MYOC/CUL3/RTN4R/RASGRF1/P2RY10/OPHN1/ABL1/ARHGEF10/MET/KANK1/APOC3/KCTD10/BCL6/STMN1/APOA1/ADRA1A/STARD8/STARD13/GPR55/ARRB1/GPR17/ITGB1/EPS8/F11R/ARHGAP35/ARHGEF3/DLC1/ABCA1/AKAP13/HEG1/ABRA/KCTD13/EPS8L2/GPR35/F2R/P2RY8/KANK2/LPAR1/EPS8L3/ARHGEF25	42	0.477273
GO:0051225	BP	GO:0051225	spindle assembly	58/6492	128/18903	0.00642508	0.0479952	0.036167	ASPM/CLASP1/SPAG5/NDC80/AURKA/TPX2/BIRC5/KIF4A/MYBL2/ARHGEF10/AURKC/FBXO5/CHMP3/WRAP73/CDC20/NEK2/GPSM2/STIL/HAUS8/CDCA8/KIF23/KIF11/NCOR1/CHMP7/HAUS6/INCENP/NEK7/HAUS1/CCSAP/SASS6/CCNB2/STARD9/RACGAP1/SPICE1/KIF15/CHMP4C/PLK1/MAPRE2/KIFC2/SAC3D1/GOLGA8A/AURKB/RCC1/MAPK15/CHEK2/TUBB/FLNA/CCDC69/PRC1/HSPA1B/MZT1/HAUS7/GOLGA8B/KIF4B/KIFC1/HAUS5/CHMP1B/TUBB8	58	0.453125
GO:0007617	BP	GO:0007617	mating behavior	21/6492	38/18903	0.00647838	0.0481841	0.0363093	MAPK8IP2/P2RX1/TACR1/PI3/SEMG1/THRA/VGF/KLK14/EDNRB/VIP/UBE2Q1/AVPR1A/DRD5/P2RY1/PTEN/NHLH2/TH/OXTR/EDDM3A/ADA/DDO	21	0.552632
GO:0072337	BP	GO:0072337	modified amino acid transport	21/6492	38/18903	0.00647838	0.0481841	0.0363093	SLC25A13/SLC6A13/SLC25A39/SLC7A9/SLC46A1/LRP2/FOLR1/SLC6A12/SLC25A12/SLC1A4/SLC19A2/ABCC4/SLC6A8/SLC38A2/SLC5A6/SLC3A1/SLC7A11/SLC6A20/FOLR2/SLC19A1/PDZK1	21	0.552632
GO:0051781	BP	GO:0051781	positive regulation of cell division	44/6492	93/18903	0.00648907	0.0481841	0.0363093	CUL3/CDC14B/BIRC5/CDC6/PDGFB/CDC25B/FGF9/AURKC/FGF8/MDK/FGF6/ECT2/IL1A/CHMP3/KIF14/PGF/TGFB3/CAT/CIT/GIPC1/EREG/CDCA8/HTR2B/KIF23/KIF20B/FGF5/FGF2/FGF7/PDGFC/INCENP/RACGAP1/TAL1/TGFA/SHH/IGF2/PDGFD/PRKCE/VEGFB/BTC/AURKB/RXFP3/MACC1/SVIL/NUP62	44	0.473118
GO:0070301	BP	GO:0070301	cellular response to hydrogen peroxide	44/6492	93/18903	0.00648907	0.0481841	0.0363093	FYN/HGF/PAX2/SIRT1/ABL1/TRPA1/MET/EZH2/SETX/PPIF/PDCD10/ECT2/FOXP1/NFE2L2/TNFAIP3/FOXO3/NR4A3/CAT/KLF2/RNF112/KDM6B/PCNA/ANXA1/IL6/IL18BP/CYP1B1/TRPM2/RHOB/SIGMAR1/MAPK13/PINK1/DDR2/ANKZF1/FABP1/AXL/CDK1/PDGFD/SPHK1/NQO1/PYCR1/LRRK2/SRC/AQP1/PCGF2	44	0.473118
GO:0048469	BP	GO:0048469	cell maturation	81/6492	187/18903	0.0064905	0.0481841	0.0363093	KDM1A/SOX8/CX3CL1/MYOC/ROPN1/CBFB/EPHA8/RPS6KA2/TRIP13/SCARF1/PGR/AKR1B1/AURKA/NRCAM/SLC26A3/PICK1/VSX1/CDC25B/ERCC2/GHRHR/LHX6/GATA3/FBXO5/CCR6/HES1/PCSK4/KIF14/FOXO3/PAEP/SEMG2/SEMG1/RUNX2/EREG/C3/KLF2/KDR/EPO/EDNRB/SIX3/BRCA2/EDNRA/NR4A2/LGI4/KCNB1/B4GALT5/NPR2/G6PD/SPTBN4/PTH1R/FLVCR1/TDRD5/TDRD10/FZD5/FEV/IHH/NKX6-1/CATSPER2/AXL/FEM1B/MECP2/BNC1/RAC3/FGG/BCL2/CLEC7A/PDE3A/RND1/CCL19/CNTNAP2/…	81	0.433155
GO:0022612	BP	GO:0022612	gland morphogenesis	56/6492	123/18903	0.00649506	0.0481841	0.0363093	HGF/CUL3/NTN1/FGF10/POLB/LIMS2/TP63/CPB2/PGR/BAX/MMP2/ESR1/LRP5L/LAMA1/ESRP2/SFRP1/FGL1/HPN/CAV1/HOXA13/FGF8/NFKB1/AREG/MDK/GLI1/NR3C1/PLXNA1/IGFBP5/RPS6KA1/PROX1/TNFAIP3/TGFB3/NKX2-3/TBX2/SOX9/NOTCH2/IL6/SULF1/FGF7/PML/EPHA2/NFIB/EDA/TGFA/TGFBR2/SHH/FEM1B/AR/RXFP1/BCL2/ID4/SCRIB/PLAG1/PTCH1/SRC/DDR1	56	0.455285
GO:0060349	BP	GO:0060349	bone morphogenesis	46/6492	98/18903	0.0065567	0.0485301	0.03657	FOXN3/IFT80/RARB/MEF2C/LRP5L/ACP5/MEGF8/COMP/DLX5/RAB23/GHR/CDX1/MEF2D/TGFB3/RUNX2/SOX9/RARA/CHSY1/TFAP2A/MMP13/BMPR1B/COL2A1/SERPINH1/MMP16/FGF18/MMP14/SKI/STC1/CBS/MSX1/IHH/TGFBR2/CITED2/FREM1/LTBP3/SHOX2/TMEM107/ATG9B/TMEM119/COL27A1/ANXA6/COL13A1/BMPR2/IFITM5/ACTN3/SCX	46	0.469388
GO:1902807	BP	GO:1902807	negative regulation of cell cycle G1/S phase transition	46/6492	98/18903	0.0065567	0.0485301	0.03657	FHL1/GTSE1/JADE1/RBL1/SUSD2/FBXO31/RBL2/CASP2/EZH2/CCL2/CCND1/PKD2/INHBA/CDK2/CDKN1A/MEN1/APC/MDM2/KLF4/PML/CTDSPL/NACC2/ATM/DACT1/PRAP1/E2F7/APBB1/WEE1/CDK2AP2/FAM107A/RFWD3/CRADD/TRIAP1/BCL2/PTEN/PLK3/PIDD1/CACNB4/CHEK2/MUC1/PLK5/DCUN1D3/KANK2/GJC2/GIGYF2/PRKDC	46	0.469388
GO:0006090	BP	GO:0006090	pyruvate metabolic process	50/6492	108/18903	0.00660144	0.0487497	0.0367355	PDK4/PDK2/IGF1/ME1/PKM/HDAC4/ENO1/SIRT6/P2RX7/PCK2/PGK1/HTR2A/GAPDHS/OGDH/PRKAG2/GIT1/GALK1/IFNG/GAPDH/TPI1/NR4A3/CBFA2T3/ALDOB/NCOR1/RPTOR/FOXK2/PKLR/OGT/PDK1/PFKM/HKDC1/HK1/PFKFB1/ADPGK/HK2/SLC2A6/HK3/PRKAA2/LDHC/SRR/DDIT4/STAT3/BPGM/PC/DHTKD1/PPARA/VDAC1/EIF6/ACTN3/INS	50	0.462963
GO:0008637	BP	GO:0008637	apoptotic mitochondrial changes	50/6492	108/18903	0.00660144	0.0487497	0.0367355	STPG1/GGCT/PLAUR/BID/IGF1/HGF/NDUFS1/GCLM/BAK1/CAMK2A/BAX/MMP9/PYCARD/BMF/PPP2CB/PDCD5/TIMM50/BBC3/PPIF/SOD2/IFIT2/CLU/ZNF205/IFI6/BCL2L2/HIP1R/HRK/CIDEB/RHOT2/JTB/SLC25A4/BCL2L11/MPV17L/PINK1/HK2/LMNA/GPER1/VDAC2/MOAP1/TRIAP1/NAIF1/NPTX1/BCL2L1/BCL2/BOK/TMEM102/FZD9/BLOC1S2/MLLT11/GPX1	50	0.462963
GO:0048638	BP	GO:0048638	regulation of developmental growth	136/6492	332/18903	0.00661119	0.048766	0.0367478	SEMA3F/ARX/MYCBP2/PAFAH1B1/JARID2/SPAG9/SEMA3G/IGF1/MUSK/CDH1/RTN4R/NTN1/TGFBR3/SEMA3A/ACACB/TP73/RIMS1/RAB21/MEF2C/KCNK2/ULK2/TBX5/NRCAM/EZR/DPYSL2/SEMA4G/TLL2/ABL1/SIX4/CPNE6/SMAD7/FGF9/PTPRS/MEGF8/MAG/WNT2/GHRHR/LIMK1/CXCL12/BMPR1A/FGF8/WNT3/RND2/GLI1/SRF/GHR/WWC1/FOXP1/RGS2/PROX1/SPP1/SOCS2/TBX2/CXCR4/CDKN1A/BBS2/STAT5A/SIX1/MACF1/VIL1/MYOD1/PARP2/FGF13/UNC13A/OLFM1/PLXNA3/DUSP9/MAP1B/NGF/EPH…	136	0.409639
GO:0050671	BP	GO:0050671	positive regulation of lymphocyte proliferation	65/6492	146/18903	0.00668444	0.0492502	0.0371126	CD6/IGF1/KITLG/FGF10/TFRC/MEF2C/JAK2/NFATC2/CD40LG/PYCARD/CD276/RIPK2/TYK2/IL2/CD81/IL23A/BCL6/HES1/HHLA2/IL1A/ZAP70/TACR1/IGFBP2/SLAMF1/MPL/CD274/CD80/NCKAP1L/CDKN1A/CD70/TICAM1/EPO/EPHB2/VAV3/IL6ST/ANXA1/IL6/TLR4/XCL1/CD1D/TNFRSF13C/CHRNB2/FCRL3/TGFBR2/SHH/IGF2/FADD/IL13/GPR183/BCL2/CCL19/STAT5B/ATAD5/CD28/TNFRSF4/ZP3/CD55/ADA/SLC39A10/PELI1/CD3E/FCGR3A/AGER/MIF/CD24	65	0.445205
GO:0051495	BP	GO:0051495	positive regulation of cytoskeleton organization	84/6492	195/18903	0.00672016	0.049457	0.0372685	CX3CL1/MYOC/NCKAP1/NAV3/PFN2/FERMT2/CLASP1/SPAG5/ACTN2/RAPGEF3/P2RX7/ABL1/RGCC/PYCARD/SFRP1/ARHGEF10/MET/LIMK1/GIT1/CSF3/SLAIN2/WASF1/TACR1/PROX1/APOA1/TGFB3/TEK/SORBS3/GPSM2/NCKAP1L/STIL/DSTN/VIL1/BAIAP2L2/SNX9/CLIP1/PLXNA3/MAP1B/NES/WASF3/SWAP70/PSRC1/ROCK2/FHOD1/BIN1/ABI2/TPM1/NTRK3/KATNB1/PLK4/PFDN2/ANKRD53/GSN/CDC42EP2/FER/SASS6/WASF2/PPP1R35/ALOX15/CDC42EP3/LMOD1/CDK5/CFL2/CEP120/MECP2/MTSS…	84	0.430769
GO:0021872	BP	GO:0021872	forebrain generation of neurons	27/6492	52/18903	0.00674014	0.0494914	0.0372944	ASPM/DCT/LHX5/OGDH/LHX6/NR2E1/HES1/PLXNA1/DLX2/PROX1/NRP2/INHBA/ZSWIM6/PLXNA3/NKX2-1/TBR1/DLX1/ATP7A/METTL3/GBX2/SEMA3E/DCLK2/OTP/NDNF/FOXG1/NHLH2/HES5	27	0.519231
GO:0051480	BP	GO:0051480	regulation of cytosolic calcium ion concentration	27/6492	52/18903	0.00674014	0.0494914	0.0372944	ATP2B4/ATP2B3/SLC8B1/CALB1/CAV1/P2RX1/SLC8A2/HRC/TRPC4/HTR1B/TRPC6/TRPC3/TRPC1/ITPR1/GRIA1/ADORA1/GPER1/P2RY1/CALCB/BOK/F2/GPR3/SLC8A1/CLN3/FZD9/PLN/RYR2	27	0.519231
GO:0055067	BP	GO:0055067	monovalent inorganic cation homeostasis	72/6492	164/18903	0.00675334	0.0495069	0.0373061	PDK4/PDK2/TFAP2B/SLC11A1/ATP1A2/OTC/KCNH2/WNK1/SLC9A7/ATP6AP1/ATP12A/SLC1A3/SLC26A3/TM9SF4/CA2/ATP1A3/ATP4A/ATP6V0A4/TCIRG1/RHAG/SLC4A9/SLC12A7/IL1A/TACR1/ATP6V1B1/TMEM9/GPR89A/ATP6V0B/SLC12A5/AVPR2/ATP6V1F/CLN6/ATP1B2/KCNA5/RHBG/SPX/TMEM165/SLC9A5/EDNRB/SCN7A/AGTR1/CORIN/SLC12A9/ATP6V0D2/EDNRA/KCNMA1/SLAMF8/TMPRSS3/ADORA1/AVPR1A/SCNN1G/CA7/NPR1/CLIC4/ATP6V0E2/BCL2/SLC9C1/DMXL1/KCNJ10/AQP11/SLC9A…	72	0.439024
GO:0030890	BP	GO:0030890	positive regulation of B cell proliferation	24/6492	45/18903	0.00675756	0.0495069	0.0373061	TFRC/MEF2C/NFATC2/IL2/CD81/BCL6/NCKAP1L/CDKN1A/TICAM1/EPHB2/VAV3/TLR4/TNFRSF13C/CHRNB2/FCRL3/IL13/GPR183/BCL2/ATAD5/TNFRSF4/ADA/SLC39A10/PELI1/MIF	24	0.533333
GO:0032535	BP	GO:0032535	regulation of cellular component size	149/6492	367/18903	0.00679784	0.0497458	0.0374861	SEMA3F/KDM1A/PAFAH1B1/SEMA3G/TMSB10/CDH1/RTN4R/CAPG/ELN/CYFIP2/NCKAP1/NTN1/PFN2/SPTB/CDHR2/SEMA3A/ADD2/ACTN2/SCTR/RAB21/ULK2/PPP1R15A/ADD1/ARHGAP28/P2RX7/NRCAM/EZR/DPYSL2/SEMA4G/MYO3A/ABL1/CDHR5/SH3BP1/ARHGAP5/PYCARD/PTPRS/MEGF8/PIK3R2/MAG/LIMK1/KANK1/CXCL12/CSF3/WNT3/RND2/ARPC3/SRF/SLC12A7/SPTBN1/CHMP3/AKT3/SPP1/CIT/NCKAP1L/SLC12A5/ARHGAP40/DSTN/MACF1/VIL1/BAIAP2L2/TMOD2/FGF13/SNX9/ARPC1B/OLFM1/…	149	0.405995
GO:0071214	BP	GO:0071214	cellular response to abiotic stimulus	137/6492	335/18903	0.00687704	0.0502117	0.0378372	KDM1A/MAP3K14/CRY1/BRCA1/ATP1A2/BAK1/HSPA5/RAD51/CYBA/OPN3/POLD1/TMEM161A/MYLK/GNB5/PTGS2/AKR1B1/BAX/MMP2/SLC4A11/MAP3K1/SIRT1/PALM/NFATC4/MMP9/ACTR5/RS1/PYCARD/BMF/RP1/SFRP1/MAG/CASP2/GATA3/PKD2L1/RGS9/NFKB1/CRYAB/RAD51AP1/LTBR/ECT2/HYAL1/ITGB6/ERRFI1/GADD45A/PKD2/CCND2/EGR1/CRY2/POLK/CDKN1A/SOX9/SLC25A23/OPN1SW/EPO/HABP4/FIGNL1/GUCY2D/PCNA/CASP9/SLC38A2/CRB1/CLOCK/MDM2/TLR4/XPA/MYC/IL33/YAP1/CA…	137	0.408955
GO:0104004	BP	GO:0104004	cellular response to environmental stimulus	137/6492	335/18903	0.00687704	0.0502117	0.0378372	KDM1A/MAP3K14/CRY1/BRCA1/ATP1A2/BAK1/HSPA5/RAD51/CYBA/OPN3/POLD1/TMEM161A/MYLK/GNB5/PTGS2/AKR1B1/BAX/MMP2/SLC4A11/MAP3K1/SIRT1/PALM/NFATC4/MMP9/ACTR5/RS1/PYCARD/BMF/RP1/SFRP1/MAG/CASP2/GATA3/PKD2L1/RGS9/NFKB1/CRYAB/RAD51AP1/LTBR/ECT2/HYAL1/ITGB6/ERRFI1/GADD45A/PKD2/CCND2/EGR1/CRY2/POLK/CDKN1A/SOX9/SLC25A23/OPN1SW/EPO/HABP4/FIGNL1/GUCY2D/PCNA/CASP9/SLC38A2/CRB1/CLOCK/MDM2/TLR4/XPA/MYC/IL33/YAP1/CA…	137	0.408955
GO:0003171	BP	GO:0003171	atrioventricular valve development	16/6492	27/18903	0.00696816	0.0505915	0.0381234	TBX5/BMPR1A/SOX4/BMP2/OLFM1/HEY2/MDM2/SMAD4/TGFBR2/TBX20/HEY1/DCHS1/EFNA1/ZFPM1/SLIT3/BMPR2	16	0.592593
GO:0003401	BP	GO:0003401	axis elongation	16/6492	27/18903	0.00696816	0.0505915	0.0381234	FGF10/ESR1/SIX4/SFRP1/AREG/PTK7/SOX9/SIX1/TRIM28/SPRY2/YAP1/NKD1/SFRP2/SPRY1/SHH/MAGI2	16	0.592593
GO:0046037	BP	GO:0046037	GMP metabolic process	16/6492	27/18903	0.00696816	0.0505915	0.0381234	MAGI3/IMPDH1/PAICS/PPAT/MPP1/CASK/DLG2/LRGUK/ADK/XDH/GART/GMPS/HPRT1/PFAS/ADA/APRT	16	0.592593
GO:1903055	BP	GO:1903055	positive regulation of extracellular matrix organization	16/6492	27/18903	0.00696816	0.0505915	0.0381234	PHLDB1/CLASP1/FSCN1/CPB2/ABL1/RGCC/SOX9/BMP2/COLGALT1/IER3IP1/IL6/EMILIN1/PHLDB2/DDR2/TNXB/EFEMP2	16	0.592593
GO:1905820	BP	GO:1905820	positive regulation of chromosome separation	16/6492	27/18903	0.00696816	0.0505915	0.0381234	CUL3/BIRC5/NCAPG/SMC4/NCAPH/DLGAP5/CDCA8/ESPL1/SMC2/ANAPC11/NCAPG2/INCENP/PRAP1/CDT1/AURKB/MAPK15	16	0.592593
GO:0019229	BP	GO:0019229	regulation of vasoconstriction	32/6492	64/18903	0.00697814	0.0506071	0.0381352	ATP1A2/PTGS2/MMP2/ABL1/SNTA1/HTR2A/CAV1/P2RX1/TACR1/FAAH/ADRA1A/AVPR2/KCNA5/TRPM4/PER2/CHRM3/MTNR1B/AGTR1/ADRA2A/AVPR1A/BDKRB2/FGG/FGA/FGB/ADRA1D/CYSLTR1/OXTR/F2R/SMTNL2/BMPR2/SMTNL1/ADRA2B	32	0.5
GO:0072332	BP	GO:0072332	intrinsic apoptotic signaling pathway by p53 class mediator	39/6492	81/18903	0.00700302	0.0507307	0.0382283	KDM1A/PDK2/E2F2/BCL3/TP63/TP73/BAX/PPP1R13B/CDIP1/MSH2/SIRT1/E2F1/PYCARD/CDKN1A/DYRK2/EDA2R/MYBBP1A/EIF5A/MDM2/MYC/CASP6/BRCA2/PML/POU4F1/JMY/MSX1/HIPK1/SHISA5/DDIT4/BDKRB2/TRIAP1/BCL2/PHLDA3/ATAD5/BOK/CHEK2/MUC1/WWOX/MIF	39	0.481481
GO:1990138	BP	GO:1990138	neuron projection extension	75/6492	172/18903	0.0070708	0.0511644	0.0385551	SEMA3F/PAFAH1B1/SPAG9/SEMA3G/VCL/CDH1/RTN4R/CYFIP2/NTN1/PRKCZ/SEMA3A/SPAG6/RIMS1/RAB21/ULK2/AURKA/NRCAM/DPYSL2/SEMA4G/ABL1/CPNE6/PTPRS/MEGF8/MAG/LIMK1/LHX2/CXCL12/PPP3CB/WNT3/WASF1/SRF/PLXNA1/NRP2/TNN/CXCR4/NRN1/MACF1/UNC13A/OLFM1/PLXNA3/MAP1B/DCLK1/SEMA4F/EMX1/KIAA0319/SEMA6D/ST8SIA2/IQGAP1/CPNE9/TMEM108/SLIT2/C9orf72/ITGB1/EDNRA/DRAXIN/TRIM46/NKX6-1/CDK5/NDEL1/SEMA6B/SEMA3E/LAMB2/RAPH1/SSNA1/CD…	75	0.436047
GO:0090287	BP	GO:0090287	regulation of cellular response to growth factor stimulus	138/6492	338/18903	0.00714893	0.051672	0.0389376	ITGA3/TFAP2B/DCN/ARID4A/HSPA5/LTBP1/DKK3/CYFIP2/ATP2B4/NEO1/TGFBR3/FGF10/FGFR1/ITGA8/LRP2/FKBP1A/LTBP4/CHRD/SIRT1/ABL1/BRMS1L/FERMT1/SMAD7/CHRDL1/FGF9/ZNF423/SFRP1/CAV1/HOXA13/GRB10/GATA3/DKK1/PBLD/MTMR4/FOLR1/WASF1/SMOC2/HRG/HES1/ONECUT2/TGFB3/SFRP5/GIPC1/TNFAIP6/PMEPA1/RUNX2/BMP2/TMEM53/WFIKKN1/RASL11B/KDR/MEN1/NOTCH2/KCP/SPRY2/NKX2-1/DAB2IP/SULF1/SDCBP/THBS1/EMILIN1/FGF2/FBN2/ACVRL1/PCSK6/TGFB…	138	0.408284
GO:0051101	BP	GO:0051101	regulation of DNA binding	55/6492	121/18903	0.00722897	0.0517951	0.0390303	KDM1A/PLAUR/IGF1/BCL3/TFAP4/JAK2/HMOX1/NFKBIA/MMP9/E2F1/GATA1/ERCC2/LHX2/GATA3/IFNG/MDFI/HAND1/HES1/MAD2L2/NEK2/MMP8/HJURP/WFIKKN1/LIF/TRIM28/HABP4/PER2/NGF/HEY2/KLF4/IRF4/PDX1/MYOCD/ZNF462/HMGA2/POU4F1/SKI/MSX1/HMGB2/HAND2/HEY1/CDT1/ANKRD33/WFIKKN2/SOX11/JUN/SUMO4/CTNNBIP1/ZNF675/DDRGK1/CALM1/AGER/CSNK2B/CPNE1/NME1	55	0.454545
GO:0007616	BP	GO:0007616	long-term memory	20/6492	36/18903	0.00723001	0.0517951	0.0390303	RASGRF1/PRKCZ/NFATC4/CALB1/CPEB3/KAT2A/SRF/TACR1/SGK1/CCND2/LRRN4/LDLR/GRIA1/CAMK2N1/MECP2/NPAS4/SLC2A4/RELN/ARC/PJA2	20	0.555556
GO:0032228	BP	GO:0032228	regulation of synaptic transmission, GABAergic	20/6492	36/18903	0.00723001	0.0517951	0.0390303	NALCN/CA2/SLC38A1/TACR1/PLCL1/ADRA1A/HTR1B/STXBP1/ZDHHC12/ADORA1/CA7/NLGN1/KIF5B/PRKCE/PTEN/HAP1/NPAS4/OXTR/CLN3/CNR2	20	0.555556
GO:0035909	BP	GO:0035909	aorta morphogenesis	20/6492	36/18903	0.00723001	0.0517951	0.0390303	TFAP2B/MYLK/EYA1/BMPR1A/FGF8/SRF/HES1/PROX1/TBX2/LRP1/SOX4/SIX1/HEY2/ACVRL1/FOXH1/ADAMTS9/HEY1/CHD7/EFEMP2/TBX1	20	0.555556
GO:0071711	BP	GO:0071711	basement membrane organization	20/6492	36/18903	0.00723001	0.0517951	0.0390303	PHLDB1/CLASP1/CMA1/MMP11/FERMT1/LAMA1/HPN/CAV1/PLOD3/NID1/PXDN/RAMP2/LAMC1/PHLDB2/ITGB1/NTNG1/SPINT2/LAMB2/FLRT2/LAMA2	20	0.555556
GO:0086005	BP	GO:0086005	ventricular cardiac muscle cell action potential	20/6492	36/18903	0.00723001	0.0517951	0.0390303	DSG2/KCNH2/PKP2/SNTA1/CAV1/KCNJ8/TRPM4/DSC2/BIN1/ANK2/SCN2B/CACNA1C/KCNE4/GPD1L/RNF207/KCNJ3/SCN3B/KCND3/CTNNA3/RYR2	20	0.555556
GO:0086010	BP	GO:0086010	membrane depolarization during action potential	20/6492	36/18903	0.00723001	0.0517951	0.0390303	ATP1A2/KCNH2/HCN2/CACNA1I/SCN1B/TRPM4/SCN7A/HCN4/ANK2/SCN2B/CACNA1C/CACNA2D1/SLMAP/CACNB2/SCN3B/SCN11A/SCN4B/SLC8A1/CACNA1H/SCN8A	20	0.555556
GO:1905332	BP	GO:1905332	positive regulation of morphogenesis of an epithelium	20/6492	36/18903	0.00723001	0.0517951	0.0390303	SOX8/PAX2/SIRT6/ABL1/SIX4/GATA3/MDK/SOX9/PAX8/SIX1/LIF/WNT2B/FGF2/GREM1/GDNF/AR/MAGED1/LBX2/HOXB7/LHX1	20	0.555556
GO:0032946	BP	GO:0032946	positive regulation of mononuclear cell proliferation	66/6492	149/18903	0.00725007	0.0518813	0.0390954	CD6/IGF1/KITLG/FGF10/TFRC/MEF2C/JAK2/NFATC2/CD40LG/PYCARD/CD276/RIPK2/TYK2/IL2/CD81/IL23A/BCL6/HES1/HHLA2/IL1A/ZAP70/TACR1/IGFBP2/SLAMF1/MPL/CD274/CD80/NCKAP1L/CDKN1A/CD70/TICAM1/EPO/EPHB2/VAV3/IL6ST/ANXA1/IL6/TLR4/XCL1/CD1D/TNFRSF13C/CHRNB2/FCRL3/TGFBR2/SHH/IGF2/FADD/IL13/GPR183/BCL2L1/BCL2/CCL19/STAT5B/ATAD5/CD28/TNFRSF4/ZP3/CD55/ADA/SLC39A10/PELI1/CD3E/FCGR3A/AGER/MIF/CD24	66	0.442953
GO:0070665	BP	GO:0070665	positive regulation of leukocyte proliferation	73/6492	167/18903	0.00726528	0.0519327	0.039134	CD6/IGF1/KITLG/FGF10/TFRC/MEF2C/IL5RA/JAK2/NFATC2/CD40LG/PYCARD/CD276/RIPK2/TYK2/IL2/CD81/IL23A/BCL6/HES1/HHLA2/IL1A/ZAP70/TACR1/IGFBP2/SLAMF1/MPL/CD274/CD80/NCKAP1L/CDKN1A/CD70/TICAM1/BST2/EPO/EPHB2/VAV3/IL6ST/ANXA1/IL6/TLR4/XCL1/IL34/KIT/CD1D/TNFRSF13C/CHRNB2/FCRL3/TGFBR2/CSF2/SHH/IGF2/FADD/IL13/GPR183/BCL2L1/BCL2/CCL19/STAT5B/ATAD5/CD28/TNFRSF4/ZP3/CD55/ADA/SLC39A10/PELI1/NMB/CD3E/FCGR3A/AGER/…	73	0.437126
GO:0003073	BP	GO:0003073	regulation of systemic arterial blood pressure	45/6492	96/18903	0.00733411	0.0520549	0.0392261	CYBA/WNK1/RPS6KA2/CMA1/PCSK5/KCNK6/PDGFB/CTSG/CTSZ/CORO2B/NCALD/SOD2/PDE4D/TACR1/ADRA1A/AVPR2/ADM2/TNNI3/SPX/EDNRB/PRCP/TPM1/KLK3/AGTR1/CORIN/ADAMTS16/PLCB3/ADORA1/CPA3/NOS3/AVPR1A/KLK2/MECP2/AR/ADRB2/DRD5/ADRA1D/HSD11B2/OXTR/F2R/GAS6/CYP4F2/ADRB3/SUCNR1/BMPR2	45	0.46875
GO:0046847	BP	GO:0046847	filopodium assembly	34/6492	69/18903	0.00734316	0.0520549	0.0392261	FSCN1/SPAG6/EZR/MYO3A/PALM/SH3BP1/SPEF1/PPP1R16B/NEURL1/SRF/DPYSL3/TGFB3/RHOQ/RAB17/FGD3/RAB3IP/ITGB4/EPHB2/FNBP1L/MIEN1/TRPM2/MYO10/PIK3R1/TENM2/DAAM2/DOCK11/GPM6A/TTYH1/NLGN1/AGRN/CLN3/DNM3/SRGAP2/S1PR2	34	0.492754
GO:0070830	BP	GO:0070830	bicellular tight junction assembly	34/6492	69/18903	0.00734316	0.0520549	0.0392261	CLDN18/ROCK1/GRHL2/OCEL1/TJP1/IL17A/SRF/ECT2/SNAI1/RAMP2/NPHP4/ROCK2/APC/MARVELD3/EPHA2/NPHP1/PARD3/MPP7/F11R/CLDN14/FZD5/CLDN1/MICALL2/CLDN3/CLDN2/CDH5/GPBAR1/CLDN5/CLDN6/CLDN24/CLDN4/MYO1C/CLDN9/PECAM1	34	0.492754
GO:0016079	BP	GO:0016079	synaptic vesicle exocytosis	51/6492	111/18903	0.00734434	0.0520549	0.0392261	SYT7/APBA2/PFN2/RIMS1/P2RX7/SNPH/HTR2A/GRIK5/STX1A/APBA1/GIT1/P2RX1/STX2/CSPG5/OTOF/RAB3GAP1/RAP1A/RIMS3/ADRA1A/GIPC1/SYT5/UNC13A/HTR1B/STX11/STXBP1/UNC13C/PREPL/SNCA/CPLX2/CASK/CHRNA6/DOC2A/ADRA2A/WNT7A/CDK5/CACNB2/PRKCB/STX3/PRRT2/CHRNA5/NLGN1/P2RY1/SYT12/PPFIA3/SCRIB/CHRM2/CACNB4/PIP5K1C/BACE1/LRRK2/VAMP2	51	0.459459
GO:0048168	BP	GO:0048168	regulation of neuronal synaptic plasticity	29/6492	57/18903	0.00734675	0.0520549	0.0392261	RASGRF1/CAMK2B/CAMK2A/ZDHHC2/GRIN2D/NEURL1/RAB3GAP1/KMT2A/SLC8A2/EGR2/VGF/EPHB2/SNCA/JPH3/NPTN/KIT/S100B/GRIK2/NETO1/HRAS/GRIN1/PPFIA3/KCNJ10/CNTN2/CLN3/SHISA6/SYNGAP1/ARC/GRIN2B	29	0.508772
GO:0050879	BP	GO:0050879	multicellular organismal movement	29/6492	57/18903	0.00734675	0.0520549	0.0392261	SLC8A3/DMPK/TNNT1/COMP/MYH3/TNNC1/NR4A1/TNNI3/TNNI2/CHRND/CHRNA1/STAC/ITPR1/TNNI1/CCDC78/MAP1A/JSRP1/CHRNB1/GAA/TCAP/SYNM/CLN8/STAC3/RCSD1/DMD/GIGYF2/GSTM2/KBTBD13/ACTN3	29	0.508772
GO:0050881	BP	GO:0050881	musculoskeletal movement	29/6492	57/18903	0.00734675	0.0520549	0.0392261	SLC8A3/DMPK/TNNT1/COMP/MYH3/TNNC1/NR4A1/TNNI3/TNNI2/CHRND/CHRNA1/STAC/ITPR1/TNNI1/CCDC78/MAP1A/JSRP1/CHRNB1/GAA/TCAP/SYNM/CLN8/STAC3/RCSD1/DMD/GIGYF2/GSTM2/KBTBD13/ACTN3	29	0.508772
GO:1903053	BP	GO:1903053	regulation of extracellular matrix organization	29/6492	57/18903	0.00734675	0.0520549	0.0392261	PHLDB1/TIE1/CLASP1/FSCN1/FAP/CPB2/ABL1/LAMA1/RGCC/NID1/LRP1/SOX9/BMP2/TCF15/COLGALT1/IER3IP1/LAMC1/IL6/EMILIN1/PRDM5/PHLDB2/DDR2/TNXB/ANGPTL7/LAMB2/EFEMP2/LAMA2/DDR1/ITGB3	29	0.508772
GO:0050731	BP	GO:0050731	positive regulation of peptidyl-tyrosine phosphorylation	83/6492	193/18903	0.00738685	0.0522818	0.0393971	FYN/IGF1/CNTN1/HGF/KITLG/TNK2/LTK/ERBB3/FGF10/TREM2/JAK2/ABL1/PDGFB/GATA1/HTR2A/ARL2BP/RIPK2/FGF8/NEURL1/CSF3/UNC119/AREG/IL2/CD81/IL23A/IFNG/NEDD9/GHR/HBEGF/HES1/EPHA4/ADRA1A/CD80/FLT3/EREG/LIF/EPO/IL6ST/LRP4/IL6/ENPP2/PARP9/FGF7/TSLP/FCGR1A/ADRA2A/ADAM17/GFRA1/BANK1/ANGPT1/LRP8/IL34/KIT/IL6R/ITGA5/TGFA/ADORA1/CSF2/IL31RA/GREM1/IGF2/IL13/EFNA1/PARP14/CSPG4/BTC/PTPN11/IFNL1/GAS6/NTF3/TNFRSF18/REL…	83	0.430052
GO:0007586	BP	GO:0007586	digestion	62/6492	139/18903	0.00755587	0.0533167	0.040177	ARX/TYMP/PTGER3/WNK1/FGF10/SCARB1/SLC46A1/SNX10/EZR/PGC/SLC5A1/VSIG1/PBLD/PPARGC1A/APOA5/MDK/IL17A/NPR3/TACR1/APOA1/SGK1/ACO1/AKR1D1/SOX9/OPRL1/WNK4/VIL1/ADM2/LDLR/HIP1R/CHRM3/CHIT1/CHIA/TLR4/CLPS/ABCG5/ABCG8/UCN2/CYP39A1/UGCG/ADRA2A/F11R/APOA2/TFF2/FABP1/UCN/PRAP1/SOAT2/CEL/MUC13/CYP8B1/OXTR/MUC6/CHRM5/CCK/ASAH2/CLPSL2/STK39/CLPSL1/PRSS1/SLC26A6/AQP1	62	0.446043
GO:0021695	BP	GO:0021695	cerebellar cortex development	26/6492	50/18903	0.00757825	0.0533167	0.040177	HSPA5/RORA/GLI2/OPHN1/LHX5/CBLN1/HERC1/OGDH/EZH2/MDK/GLI1/PROX1/KIF14/TTBK2/FAIM2/ZNF365/RERE/DIXDC1/WNT7A/CDK5/ATP7A/NEUROD2/SPTBN2/PTPN11/CEND1/LHX1	26	0.52
GO:0006284	BP	GO:0006284	base-excision repair	23/6492	43/18903	0.00758252	0.0533167	0.040177	PNKP/POLQ/FAM168A/POLD1/POLB/UNG/SIRT6/LIG1/RPA3/NEIL3/SMUG1/PARP2/PCNA/MUTYH/XPA/DNA2/TDG/NEIL1/HMGA2/FEN1/APEX2/USP47/POLE	23	0.534884
GO:0008608	BP	GO:0008608	attachment of spindle microtubules to kinetochore	23/6492	43/18903	0.00758252	0.0533167	0.040177	MAD1L1/SPAG5/NDC80/BIRC5/AURKC/KAT2B/ECT2/NEK2/KNSTRN/CCNB1/CDCA8/APC/CENPE/KIF2C/NUF2/INCENP/SPC25/BUB3/RACGAP1/SPC24/CDT1/AURKB/RCC2	23	0.534884
GO:0021879	BP	GO:0021879	forebrain neuron differentiation	23/6492	43/18903	0.00758252	0.0533167	0.040177	LHX5/OGDH/LHX6/HES1/PLXNA1/DLX2/PROX1/NRP2/INHBA/ZSWIM6/PLXNA3/NKX2-1/TBR1/DLX1/ATP7A/GBX2/SEMA3E/DCLK2/OTP/NDNF/FOXG1/NHLH2/HES5	23	0.534884
GO:0051150	BP	GO:0051150	regulation of smooth muscle cell differentiation	23/6492	43/18903	0.00758252	0.0533167	0.040177	PRDM6/NFATC3/SIRT1/PDGFB/NFATC2/FGF9/OLFM2/SOD2/SRF/EREG/DNMT1/NFATC1/HEY2/MYOCD/ZEB1/PDCD4/KIT/SHH/GPER1/RBPMS2/MECP2/EFEMP2/FOXO4	23	0.534884
GO:0007274	BP	GO:0007274	neuromuscular synaptic transmission	15/6492	25/18903	0.00762447	0.0534374	0.0402679	KIF1B/RIMBP2/ERC1/MYLK2/DTNA/STXBP1/CHRNA1/CHRNB2/RAPSN/NLGN1/CHRNB1/EGR3/STAC3/ADARB1/FCHSD1	15	0.6
GO:0021854	BP	GO:0021854	hypothalamus development	15/6492	25/18903	0.00762447	0.0534374	0.0402679	BAX/PLXNA1/RAB3GAP1/NRP2/PLXNA3/RAX/NKX2-1/SRD5A1/SEMA3E/OTP/FOXB1/NDNF/HAP1/NHLH2/SRD5A2	15	0.6
GO:0046697	BP	GO:0046697	decidualization	15/6492	25/18903	0.00762447	0.0534374	0.0402679	PTGS2/CYP27B1/ASH1L/SPP1/LIF/PARP2/MEN1/DEDD/STC1/TPPP3/TCF23/CITED2/GJB2/JUNB/EPOR	15	0.6
GO:0048593	BP	GO:0048593	camera-type eye morphogenesis	58/6492	129/18903	0.00782662	0.0547747	0.0412757	WNT16/SOX8/TFAP2B/BAK1/CDON/PAX2/BAX/RPGRIP1/VSX1/RS1/RP1/CALB1/WNT2/PITX3/MFN2/PROX1/TBX2/SOX9/KDR/EPHB2/WNT2B/NOTCH2/CRB1/TFAP2A/STRA6/SIX3/ABI2/FOXN4/EPHA2/WNT9A/MEIS1/SHROOM2/CRB2/ZEB1/ROM1/EPHB1/MEGF11/SKI/FZD5/HIPK1/IHH/PITX2/CITED2/FAT3/STAT3/COL8A2/CABP4/SOX11/ZHX2/FJX1/TH/ALDH1A3/FOXE3/DIO3/RORB/HMGN1/AQP1/LHX1	58	0.449612
GO:0009994	BP	GO:0009994	oocyte differentiation	31/6492	62/18903	0.00784915	0.0547747	0.0412757	IGF1/RPS6KA2/TRIP13/AURKA/CDC25B/AURKC/FBXO5/FOXO3/EREG/DMRT1/PDE5A/LGR5/BRCA2/ATM/EDNRA/NPR2/TDRD5/INHBB/TDRD10/SOHLH1/BNC1/BCL2/PDE3A/TDRD6/TDRKH/FIGLA/FOXL2/ZP3/ANG/ZGLP1/TUBB8	31	0.5
GO:0043030	BP	GO:0043030	regulation of macrophage activation	31/6492	62/18903	0.00784915	0.0547747	0.0412757	CX3CL1/RORA/CST7/CD200/TREM2/BPI/CTSC/IL1RL1/PLA2G4A/MMP8/LBP/LDLR/JUND/SYT11/IL6/TLR4/IL33/THBS1/SNCA/TTBK1/MFHAS1/ATM/IL31RA/LRFN5/IL13/SPHK1/LRRK2/SHPK/PJA2/MIF/CEBPA	31	0.5
GO:0090303	BP	GO:0090303	positive regulation of wound healing	31/6492	62/18903	0.00784915	0.0547747	0.0412757	ENPP4/MYLK/FERMT2/CPB2/APOH/FERMT1/KANK1/SMOC2/HBEGF/HRG/NFE2L2/F3/CXCR4/PLAU/F12/ANXA1/THBS1/EMILIN1/ITGB1/ADRA2A/USF1/DDR2/CLDN1/CLDN3/PRKCE/CLEC7A/HRAS/ANO6/F2/F2R/CLDN4	31	0.5
GO:0006757	BP	GO:0006757	ATP generation from ADP	40/6492	84/18903	0.00802359	0.0557343	0.0419987	IGF1/PKM/HDAC4/ENO1/SIRT6/P2RX7/PGK1/HTR2A/GAPDHS/OGDH/PRKAG2/GIT1/GALK1/IFNG/GAPDH/TPI1/CBFA2T3/ALDOB/NCOR1/RPTOR/FOXK2/PKLR/OGT/PFKM/HKDC1/HK1/PFKFB1/ADPGK/HK2/SLC2A6/HK3/PRKAA2/DDIT4/STAT3/BPGM/DHTKD1/PPARA/EIF6/ACTN3/INS	40	0.47619
GO:0015844	BP	GO:0015844	monoamine transport	40/6492	84/18903	0.00802359	0.0557343	0.0419987	SYT7/SYT13/GPM6B/MAOB/ACTB/PICK1/HRH3/HTR2A/SLC6A2/STX1A/CXCL12/P2RX1/SYT5/SYT11/HTR1B/SNCA/VIP/SLC22A3/CHRNA6/CRH/ADRA2A/KCNB1/PINK1/CHRNB2/SLC18A2/GDNF/MECP2/RAB3B/P2RY1/SYT12/SLC22A1/KCNA2/OXTR/MAPK15/CHRM5/FFAR3/SYT15/SYT3/ITGB3/ADRA2B	40	0.47619
GO:0031424	BP	GO:0031424	keratinization	40/6492	84/18903	0.00802359	0.0557343	0.0419987	CDH3/TGM1/CASP14/CNFN/IL1A/PPL/KRT85/KRT7/KRT71/ABCA12/TCHH/SPRR2G/IVL/SPRR2D/KLK5/SPRR1B/SPRR1A/KRT8/KRT78/KRT86/KRT75/KRT6C/KRT74/KRT83/SHARPIN/SPRR4/KRT6B/KRT79/LCE1E/KRT3/KRT16/KRT77/SPRR2B/SPRR2E/LIPK/CDSN/KRT6A/KRT81/LCE1F/SPRR2F	40	0.47619
GO:0009954	BP	GO:0009954	proximal/distal pattern formation	19/6492	34/18903	0.00806419	0.0557343	0.0419987	FGF10/TP63/GLI2/GLI1/DLX2/HOXC11/CHSY1/LRP4/SIX3/OSR1/DLX1/EN1/SP8/GREM1/HOXB9/HOXC9/HOXC10/PBX1/HES5	19	0.558824
GO:0034405	BP	GO:0034405	response to fluid shear stress	19/6492	34/18903	0.00806419	0.0557343	0.0419987	PKD1/PTGS2/MEF2C/MMP2/P2RX7/SMAD7/NFE2L2/PKD2/TGFB3/KLF2/P2RX4/KLF4/CSF2/CITED2/NOS3/ABCA1/MTSS1/SOCS5/SRC	19	0.558824
GO:0046475	BP	GO:0046475	glycerophospholipid catabolic process	19/6492	34/18903	0.00806419	0.0557343	0.0419987	SCARB1/ABHD12/GDPD3/PLA2G15/PLA2G4C/PLA2G4A/GPCPD1/PLA2G5/LDLR/APOC1/PNPLA7/SMPD4/ENPP2/PLA2G7/GDPD1/PLB1/ENPP6/LIPC/PLCB1	19	0.558824
GO:0086004	BP	GO:0086004	regulation of cardiac muscle cell contraction	19/6492	34/18903	0.00806419	0.0557343	0.0419987	ATP1A2/DSG2/PKP2/CAV1/PDE4D/FGF13/TRPM4/DSC2/BIN1/HCN4/CAMK2D/ANK2/CACNA1C/STC1/ADORA1/CTNNA3/PDE4B/PLN/RYR2	19	0.558824
GO:0090162	BP	GO:0090162	establishment of epithelial cell polarity	19/6492	34/18903	0.00806419	0.0557343	0.0419987	PKD1/MYO9A/CLASP1/CAMSAP3/OPHN1/SH3BP1/FERMT1/LAMA1/FOXF1/SIPA1L3/IFT20/PTK7/HES1/FRMD4B/TCF15/PARD3/SHH/SYNE4/HES5	19	0.558824
GO:0110110	BP	GO:0110110	positive regulation of animal organ morphogenesis	19/6492	34/18903	0.00806419	0.0557343	0.0419987	SOX8/FGF10/SIX4/WNT2/GATA3/FGF8/DKK1/HOXC11/SOX9/BMP2/SIX1/GATA5/WNT2B/FGF2/SPRY1/MESP1/GDNF/AR/CD34	19	0.558824
GO:0070372	BP	GO:0070372	regulation of ERK1 and ERK2 cascade	129/6492	315/18903	0.00807754	0.0557669	0.0420234	CALCR/CX3CL1/IGF1/ROS1/LMO3/ABCA7/PRKCZ/FGF10/FERMT2/FBLN1/EZR/TREM2/ABL1/TIMP3/PDGFB/FAM83D/HTR2A/PYCARD/RIPK2/FGF21/ACTA2/FGF8/CRYBA1/CCL7/CCL2/DUSP3/IL26/PTPN6/IL1A/CCL20/DNAJC27/EPHA4/ERRFI1/RAP1A/SLAMF1/TEK/TNFSF11/DUSP4/ADRA1A/INHBA/RAMP3/GLIPR2/BMP2/RRAS/PLA2G5/KDR/LIF/EPO/DUSP9/AKAP12/CHI3L1/EPHB2/DUSP26/NOTCH2/PDGFRA/EPHA7/GPR55/HTR2B/SPRY2/DAB2IP/TLR4/ARRB1/EMILIN1/FGF2/ADCYAP1/SMAD4/ER…	129	0.409524
GO:0006694	BP	GO:0006694	steroid biosynthetic process	77/6492	178/18903	0.00810437	0.0558925	0.042118	HSD17B6/CYP46A1/DKK3/MSMO1/OSBPL3/SREBF1/RDH8/AKR1B1/SIRT1/SEC14L2/CYB5R3/ACOT8/SQLE/LHB/PRKAG2/HSD17B1/NFKB1/APOA5/MVK/CYP27B1/IFNG/BMP5/NR3C1/SCAP/CLCN2/IL1A/DHCR24/PROX1/APOA1/EGR1/AKR1D1/SNAI1/BMP2/SRD5A3/HSD17B3/ACLY/STARD3/HSD17B7/CGA/CYP27A1/BAAT/NR5A1/LHCGR/CH25H/DHH/CYP11A1/CYP1A1/OSBPL1A/LBR/SRD5A1/CYP39A1/EBP/NSDHL/CRH/TM7SF2/G6PD/FDPS/CYP3A4/CYP3A7/FDXR/FGF19/PRKAA2/IGFBP7/CYB5R2/FAXD…	77	0.432584
GO:0008217	BP	GO:0008217	regulation of blood pressure	82/6492	191/18903	0.00811752	0.0559236	0.0421414	NOS2/ATP1A2/CYBA/WNK1/ABCC9/RPS6KA2/PTGS2/CMA1/PTGS1/PCSK5/KCNK6/HMOX1/PDGFB/CTSG/BDKRB1/CTSZ/CORO2B/NCALD/ACTA2/P2RX1/SOD2/GLP1R/NPR3/PDE4D/TACR1/ID2/SGK1/ADRA1A/OPRL1/AVPR2/ADM2/TNNI3/RAMP2/SPX/P2RX4/EDNRB/PRCP/EMILIN1/ACVRL1/TPM1/KLK3/AGTR1/CORIN/ADAMTS16/PLCB3/EDNRA/NPR2/ADORA1/CPA3/UCN/NOS3/AVPR1A/SCNN1G/TAC3/KLK2/MECP2/AR/ADRB2/NPR1/DRD5/TACR3/APLN/ADRA1D/CD34/TAC4/HSD11B2/AGTRAP/OXTR/F2R/G…	82	0.429319
GO:0007589	BP	GO:0007589	body fluid secretion	42/6492	89/18903	0.00813683	0.0559374	0.0421518	CYBA/WNK1/FGF10/CAV1/GHRHR/NEURL1/CCND1/OAS2/NPR3/UMPS/TACR1/VAMP8/SOCS2/STAT5A/WNK4/CDO1/ANO1/CHRM3/PAM/VIP/XDH/HK2/ADORA1/UCN/ATP7A/NPR1/CEL/PRKCE/APLN/FOXB1/MTX1/STAT5B/SLC29A2/NLRP6/ALOX12B/OXTR/ADA/STK39/APRT/DDR1/NME1/AQP1	42	0.47191
GO:0048678	BP	GO:0048678	response to axon injury	42/6492	89/18903	0.00813683	0.0559374	0.0421518	RTN4R/SCARF1/KCNK2/BAX/MMP2/TREM2/JAK2/RANGAP1/PTPRS/MAG/FOLR1/SOD2/DPYSL3/CSPG5/EPHA4/MTR/SPP1/KLK8/EPO/MAP1B/P2RX4/KLF4/KIAA0319/FGF2/NTRK3/CERS2/KCNB1/GIP/NDEL1/AXL/P2RY12/CDK1/BCL2/PTEN/LAMB2/JUN/RGMA/RTN4RL2/APOD/FLNA/LYN/NEFL	42	0.47191
GO:0044270	BP	GO:0044270	cellular nitrogen compound catabolic process	188/6492	474/18903	0.00820362	0.0563368	0.0424528	ENPP4/CSDE1/DNASE1L1/DPEP1/SLC11A1/SAMD4A/DERA/TYMP/VIM/RNASET2/NSUN2/MRTO4/ENTPD2/ROCK1/SMG6/PABPC1/IGF2BP2/ACAT1/RBM7/UNG/EXOSC5/TNRC6C/PKP1/TRAF5/BAX/CNOT3/PCBP4/ACOT7/CIRBP/CYP2D6/HMOX1/APOBEC3H/TNRC6B/SAMHD1/E2F1/AHCY/MLYCD/QPRT/POP1/RNASEH2A/IL4I1/DNASE2/DDX49/SMG9/NUDT1/LSM5/AMBP/EXOSC3/CPEB3/MAGOHB/OAS2/SLCO1B3/RBM24/DNPH1/PDE4D/KYNU/SMG7/NT5C1A/KMO/SLIRP/ALDH6A1/ETF1/NUDT10/SMUG1/FASTKD3…	188	0.396624
GO:0003333	BP	GO:0003333	amino acid transmembrane transport	48/6492	104/18903	0.00822608	0.0564311	0.0425238	SLC25A13/SLC6A13/SLC6A7/SLC38A5/SLC11A1/ATP1A2/SLC7A9/SLC1A3/SLC25A15/SLC38A7/SLC7A6/SLC17A7/SLC1A6/SLC6A12/SLC38A1/SLC16A10/SLC25A12/SLC1A4/RGS2/SLC25A2/SLC6A6/SLC6A11/PER2/SLC38A2/SLC3A1/SLC38A4/SLC38A6/SLC16A2/SLC43A1/ITGB1/SLC7A11/SFXN2/MFSD12/SLC6A20/SFXN1/SLC7A3/SLC3A2/ARL6IP1/LRRC8D/SLC6A19/SLC38A9/SLC25A22/KCNJ10/CLN8/SLC38A3/CLN3/SLC6A9/SLC25A29	48	0.461538
GO:0007405	BP	GO:0007405	neuroblast proliferation	33/6492	67/18903	0.00825587	0.0565754	0.0426326	KDM1A/CX3CL1/PAFAH1B1/TEAD3/ASPM/EML1/WDR62/DCT/SMARCD3/NUMBL/AKNA/KCNA1/NR2E1/ARTN/PROX1/FGF13/SOX5/SIX3/FGF2/DMRTA2/VAX1/ITGB1/RACGAP1/HHIP/DAGLB/SHH/CX3CR1/OTP/ID4/FOXG1/FZD9/LRRK2/PLXNB2	33	0.492537
GO:0071320	BP	GO:0071320	cellular response to cAMP	28/6492	55/18903	0.00826696	0.0565915	0.0426447	KDM1A/HSPA5/RAPGEF3/SLC26A3/EZR/HCN2/GATA1/EEF2K/AQP9/SLC5A5/IGFBP5/RAP1A/PKD2/CYP1B1/HCN4/HCN3/SRD5A1/CRHBP/AKAP6/STC1/INHBB/PENK/SLC8A1/WT1/ZFP36L1/PDE2A/SLC26A6/AQP1	28	0.509091
GO:0035024	BP	GO:0035024	negative regulation of Rho protein signal transduction	14/6492	23/18903	0.00830419	0.0567263	0.0427463	ITGA3/MYOC/CUL3/MET/KANK1/KCTD10/BCL6/STMN1/ADRA1A/ITGB1/ARHGAP35/DLC1/HEG1/KCTD13	14	0.608696
GO:0150146	BP	GO:0150146	cell junction disassembly	14/6492	23/18903	0.00830419	0.0567263	0.0427463	ABCC8/CX3CL1/TREM2/DKK1/DUSP3/EPHA4/TGFB3/C3/PIK3R1/FER/CDK5/MAPRE2/CX3CR1/STON1	14	0.608696
GO:0060421	BP	GO:0060421	positive regulation of heart growth	22/6492	41/18903	0.00850933	0.0579797	0.0436908	IGF1/TGFBR3/ACACB/MEF2C/TBX5/FGF9/WNT2/BMPR1A/GLI1/PROX1/TBX2/PARP2/HEY2/PIM1/YAP1/FGF2/GATA6/AKAP6/TBX20/ZFPM2/CDK1/WT1	22	0.536585
GO:1905314	BP	GO:1905314	semi-lunar valve development	22/6492	41/18903	0.00850933	0.0579797	0.0436908	ELN/TIE1/ROCK1/GATA3/SNAI1/SOX9/BMP2/GATA5/NFATC1/NOTCH2/ROCK2/HEY2/STRA6/EMILIN1/SLIT2/TBX20/HEY1/NOS3/EFNA1/NKX2-5/SLIT3/BMPR2	22	0.536585
GO:0003197	BP	GO:0003197	endocardial cushion development	25/6492	48/18903	0.00852352	0.0579797	0.0436908	ERBB3/TBX5/FOXF1/BMPR1A/FGF8/BMP5/RBM24/TBX2/SNAI1/SOX9/BMP2/GATA5/HEY2/MDM2/ACVRL1/SMAD4/MSX1/TGFBR2/CITED2/TBX20/HEY1/NOS3/TMEM100/DCHS1/BMPR2	25	0.520833
GO:0006195	BP	GO:0006195	purine nucleotide catabolic process	25/6492	48/18903	0.00852352	0.0579797	0.0436908	ACAT1/ACOT7/SAMHD1/MLYCD/DNPH1/PDE4D/NT5C1A/NUDT10/NT5C/ITPA/SUCLA2/NUDT15/PDE5A/NUDT7/XDH/HPRT1/NUDT8/PDE7B/PDE4B/PDE2A/ADA/FITM2/NUDT16/PDE7A/NUDT19	25	0.520833
GO:0048565	BP	GO:0048565	digestive tract development	59/6492	132/18903	0.00854115	0.0580385	0.0437351	PKD1/OTC/PRDM1/CLDN18/FGF10/TP63/GLI2/RARB/PCSK5/FGF9/FOXF1/SALL1/SFRP1/MEGF8/HOXA13/NKX3-2/GLI1/HES1/ACVR2B/ID2/TCF21/TGFB3/NKX2-3/SFRP5/TBX2/SOX9/NKX2-2/GATA5/PYY/IL6ST/PDGFRA/EDNRB/YAP1/STRA6/PDX1/CYP1A1/MYOCD/GATA6/SFRP2/PDGFC/KIT/PKDCC/FZD5/IHH/TGFBR2/SHH/SOX17/CDX2/DACT1/CLMP/DCHS1/RBPMS2/SHOX2/BCL2/SOX11/TYMS/OXTR/ADA/SRC	59	0.44697
GO:0043409	BP	GO:0043409	negative regulation of MAPK cascade	78/6492	181/18903	0.00864933	0.058712	0.0442426	PAFAH1B1/ZMYND11/LMO3/ABCA7/FBLN1/CYLD/P2RX7/IRAK3/EZR/TREM2/ABL1/TIMP3/SFRP1/PIK3R2/CAV1/AMBP/CRYBA1/CDK5RAP3/DUSP3/HIPK3/FOXM1/PTPN6/EPHA4/ERRFI1/ASH1L/RGS2/DUSP1/DUSP4/MAPK8IP1/BMP2/PRMT1/LIF/DUSP9/GPS2/EPHB2/DUSP26/MEN1/SPRY2/DAB2IP/TLR4/MYC/EMILIN1/DUSP5/MARVELD3/NCOR1/SMAD4/PRDM15/CBLC/SFRP2/PDCD4/FOXO1/PTPRR/CNKSR3/DUSP2/PINK1/LEMD2/ATF3/DUSP19/SPRY1/GPER1/DACT1/SPRED1/PBK/EFNA1/PTEN/CHRNA…	78	0.430939
GO:0045444	BP	GO:0045444	fat cell differentiation	102/6492	244/18903	0.00879846	0.0596617	0.0449583	SOX8/TFAP2B/WWTR1/PIAS1/LMO3/RORA/FGF10/SREBF1/FERMT2/PTGS2/SIRT6/RUNX1T1/C1QTNF3/AAMDC/SIRT1/MMP11/PNPLA3/TRIB3/E2F1/ZNF516/HTR2A/MEDAG/SFRP1/CLIP3/GATA3/SULT1E1/UCP1/PPARGC1A/ZBTB16/CCND1/CREBL2/SOD2/FAM120B/HES1/ID2/RGS2/NR4A3/ALDH6A1/EGR2/NR4A1/BBS2/BMP2/SIX1/STEAP4/ZFP36/TPH1/TRPM4/PER2/GPS2/SORT1/PDGFRA/IL6/KLF4/PIM1/ATAT1/YAP1/JDP2/TGFB1I1/FTO/NUDT7/PRDM16/SFRP2/HTR2C/HMGA2/ARID5B/FOXO1/CC…	102	0.418033
GO:0031279	BP	GO:0031279	regulation of cyclase activity	37/6492	77/18903	0.00882017	0.0597463	0.045022	NOS2/GUCA2B/GUCA1A/PALM/ACR/VIPR2/GHRHR/NCS1/RCVRN/GLP1R/CAP2/NPR3/RGS2/AVPR2/GALR3/EDNRB/GABBR2/LHCGR/GUCA1C/ADCYAP1/CACNA1C/EDNRA/NOS3/GALR1/STIM1/ADRB2/DRD5/FSHR/RXFP1/PDZD3/GALR2/ADRB3/GRM7/GUCA2A/CALM1/GRM3/LTB4R2	37	0.480519
GO:0021987	BP	GO:0021987	cerebral cortex development	53/6492	117/18903	0.00895333	0.0604537	0.0455551	KDM1A/ARX/PAFAH1B1/TACC3/CDON/ASPM/WDR62/BAX/ATP1A3/LHX2/LHX6/MDK/PHACTR1/NR2E1/KIF14/BBS2/MBOAT7/FOXP2/FGF13/NSUN5/SLC38A2/EMX1/NKX2-1/TBR1/DAB2IP/MGARP/TACC2/DMRTA2/SLIT2/SRD5A1/TACC1/DIXDC1/LRP8/GART/CCDC141/CDK5/NDEL1/CEP120/P2RY12/CDK5R2/FBXO45/CNTNAP2/FOXG1/CDK5R1/TH/PLCB1/ARHGAP11B/RELN/FAT4/POU3F3/CCDC85C/SRGAP2/NEFL	53	0.452991
GO:0043406	BP	GO:0043406	positive regulation of MAP kinase activity	53/6492	117/18903	0.00895333	0.0604537	0.0455551	KITLG/FGFR1/MEF2C/P2RX7/PDGFB/HTR2A/EZH2/DKK1/TPD52L1/SASH1/GHR/PDCD10/EPHA4/TNFSF11/FLT3/TRAF2/AJUBA/MAP3K10/HTR2B/DAB2IP/TLR4/THBS1/FGF2/PDE5A/NTRK3/ERBB2/PDGFC/ADRA2A/ADAM8/FGF18/IL34/KIT/DUSP19/TGFA/FZD5/MST1R/MAP4K2/ROR2/AKAP13/PDGFD/CCL19/HRAS/FZD4/MAGED1/IRAK1/NTF3/LRRK2/SRC/ELANE/AGER/MIF/GH1/CD24	53	0.452991
GO:0003180	BP	GO:0003180	aortic valve morphogenesis	18/6492	32/18903	0.00898801	0.0604537	0.0455551	ELN/TIE1/ROCK1/GATA3/SNAI1/SOX9/GATA5/NFATC1/ROCK2/HEY2/EMILIN1/SLIT2/TBX20/HEY1/NOS3/EFNA1/NKX2-5/SLIT3	18	0.5625
GO:0010644	BP	GO:0010644	cell communication by electrical coupling	18/6492	32/18903	0.00898801	0.0604537	0.0455551	ATP1A2/PKP2/TBX5/ATP1A3/CAV1/KCNA1/PDE4D/CASQ2/ATP1B2/HRC/CAMK2D/CACNA1C/GJB2/GJC1/SLC8A1/RYR2/CALM1/GJC2	18	0.5625
GO:0043552	BP	GO:0043552	positive regulation of phosphatidylinositol 3-kinase activity	18/6492	32/18903	0.00898801	0.0604537	0.0455551	EPHA8/PDGFB/TEK/FLT3/VAV3/PDGFRA/AGAP2/FGF2/KIT/VAV2/IRS1/P2RY12/CCL19/CD19/TNFAIP8L3/PRKD1/SRC/LYN	18	0.5625
GO:0051642	BP	GO:0051642	centrosome localization	18/6492	32/18903	0.00898801	0.0604537	0.0455551	PAFAH1B1/ASPM/PLXNA2/AURKA/EZR/IFT20/PARD3B/GPSM2/DLGAP5/DYNC1LI2/FHOD1/PARD3/RANBP2/CCDC141/MAD2L1/NDEL1/KIF5B/CEP83	18	0.5625
GO:0008090	BP	GO:0008090	retrograde axonal transport	13/6492	21/18903	0.00899002	0.0604537	0.0455551	PAFAH1B1/FBXW11/KIF1C/KIF1A/MGARP/TMEM108/DLG2/DST/NDEL1/MAP1A/KIF5B/HAP1/NEFL	13	0.619048
GO:0002685	BP	GO:0002685	regulation of leukocyte migration	97/6492	231/18903	0.00902166	0.0606034	0.0456679	CX3CL1/SELE/DAPK2/KITLG/WNK1/SLC8B1/CD200/TREM2/ABL1/MADCAM1/HMOX1/BDKRB1/CD99L2/PYCARD/C5/CXCL12/CCL7/CCL2/MDK/CD81/IL23A/NEDD9/BMP5/CCR6/IL1A/CCL20/TACR1/SLAMF1/PADI2/PGF/DUSP1/NCKAP1L/TNFAIP6/MTUS1/LBP/MPP1/SWAP70/LYVE1/ANXA1/P2RX4/LRCH1/IL6/IL33/THBS1/ADAM10/EMILIN1/XCL1/ECM1/S100A7/SLIT2/PIK3R1/PLA2G7/ADAM8/ADAM17/CCL28/JAM2/CXCL13/MMP14/IL34/SLAMF8/IL6R/ADORA1/JAM3/GREM1/FADD/CX3CR1/RHOH/GC…	97	0.419913
GO:0015850	BP	GO:0015850	organic hydroxy compound transport	120/6492	292/18903	0.00910738	0.0611158	0.046054	ABCB4/SYT7/RALBP1/SYT13/OSBPL5/GRAMD1B/GPM6B/ABCA7/GAL/MAOB/LRP6/OSBPL3/SCARB1/ACTB/SLCO1A2/TREM2/SIRT1/ZDHHC8/SLC16A8/SLC5A1/SLC10A1/NFKBIA/HRH3/LIPG/HTR2A/SLC6A2/AQP9/CAV1/STX1A/CXCL12/P2RX1/NFKB1/MFSD10/APOA5/APOC3/SLCO1B3/STX12/APOA1/SLC16A7/SPP1/CLU/EEPD1/LRP1/ABCC4/WNK4/SYT5/LDLR/APOC1/STARD3/NR0B2/GPS2/SYT11/SLCO1B1/HTR1B/STRA6/ABCG5/MTTP/SLCO1C1/ABCA8/OSBPL1A/SLC16A3/AQP10/ABCG8/ABCA12/OS…	120	0.410959
GO:0007626	BP	GO:0007626	locomotory behavior	84/6492	197/18903	0.00915722	0.0613866	0.0462581	PAFAH1B1/CNTN1/ATP1A2/UBA6/APBA2/USP2/PREX2/MCOLN3/DMRT3/MYO15A/ZDHHC8/RASD2/ABHD12/CALB1/GRIN2D/APBA1/CXCL12/PPP3CB/PITX3/GIT1/SOD2/SOBP/ARRDC3/ID2/EPHA4/OPRD1/CCND2/HOXB8/EGR1/OPRL1/FOXA2/SLURP1/ASL/GAD1/CLN6/IDO1/NKX2-1/TMOD1/NCOR1/MEIS1/SNCA/HTR2C/CRH/EPS8/ZIC1/NR4A2/LGI4/RCAN1/GIP/SPTBN4/CHRNB2/LMX1A/LRRTM1/EN1/HPGDS/GBX1/ATP7A/SLC18A2/HPRT1/PBX3/GDNF/MECP2/TRH/PRKCE/GAA/CHD7/PTEN/NEGR1/ADCY…	84	0.426396
GO:0060419	BP	GO:0060419	heart growth	47/6492	102/18903	0.00918304	0.0614959	0.0463405	JARID2/IGF1/TGFBR3/ACACB/TP73/MEF2C/KCNK2/TBX5/ABL1/FGF9/WNT2/BMPR1A/PRKAR1A/GLI1/FOXP1/RGS2/PROX1/ADRA1A/TBX2/PARP2/DUSP9/HEY2/PIM1/YAP1/FGF2/GATA6/TENM4/AKAP6/SORBS2/CXADR/SKI/G6PD/PDLIM5/TGFBR2/CITED2/PI16/TBX20/MESP1/ZFPM2/CDK1/AKAP13/S1PR1/PTEN/HEG1/NKX2-5/WT1/PPARA	47	0.460784
GO:0006942	BP	GO:0006942	regulation of striated muscle contraction	45/6492	97/18903	0.00920022	0.0615166	0.0463561	EHD3/ATP1A2/DSG2/PKP2/SLC8A3/SMAD7/DMPK/CAV1/PDE4D/RGS2/TNNI3K/CASQ2/ADRA1A/NR4A1/FGF13/TNNI3/HRC/TRPM4/MYBPH/DSC2/P2RX4/BIN1/HCN4/PDE5A/CAMK2D/ANK2/CACNA1C/CLIC2/RNF207/STC1/TNNI1/MYL3/ADORA1/UCN/SLC8A1/NKX2-5/CTNNA3/PDE4B/PLN/RYR2/CALM1/DMD/GSTM2/KBTBD13/ACTN3	45	0.463918
GO:0007416	BP	GO:0007416	synapse assembly	79/6492	184/18903	0.00921285	0.0615166	0.0463561	MYCBP2/MUSK/CDH1/NTN1/ADD2/MEF2C/PCDHB4/NRCAM/SIX4/CBLN1/EEF2K/DKK1/NRXN2/PCDHB2/GABRG2/SLITRK3/RAB17/LRFN3/SIX1/LRRC4/FGF13/ARHGEF9/LRRC4B/MAP1B/EPHB2/LRP4/EPHA7/TLR2/SDCBP/CLSTN3/AMIGO2/NTRK3/ST8SIA2/SNCA/LRRTM2/KIRREL3/CNTN5/GPM6A/GABRA2/POU4F1/PTPRD/WNT7A/EPHB1/NPTN/CLSTN2/ZDHHC12/CHRNB2/LRRTM1/PDLIM5/FZD5/PLXNB1/CDK5/LRFN5/MECP2/IL1RAPL1/NLGN1/NPTX1/PTEN/NEGR1/LRFN4/SPTBN2/FBXO45/NPAS4/LRRN1…	79	0.429348
GO:0072330	BP	GO:0072330	monocarboxylic acid biosynthetic process	92/6492	218/18903	0.00921466	0.0615166	0.0463561	PDK4/BRCA1/CYP46A1/OSBPL3/DHRS9/PTGS2/MGLL/ACACB/PTGS1/SIRT1/ACOT7/SCD/CYP2D6/TRIB3/ACOT8/LIPG/FA2H/MLYCD/ACSBG1/PRKAG2/PTGDS/APOA5/APOC3/QKI/SCAP/MECR/PLA2G4A/KMO/PROX1/APOA1/ELOVL3/AKR1D1/PLP1/PTGIS/APOC1/ACSBG2/RGN/IDO1/ACLY/PRKAB2/PER2/FADS2/ANXA1/CYP27A1/BAAT/CYP2C9/CYP2C8/CYP1A1/CYP1A2/OSBPL1A/PKLR/ABHD1/CYP39A1/PTGES/FADS1/OXSM/ABHD3/SLC45A3/GIP/CBR1/CYP3A4/ALOX15/FGF19/PRKAA2/HPGDS/DAGLB/…	92	0.422018
GO:0015800	BP	GO:0015800	acidic amino acid transport	32/6492	65/18903	0.00928522	0.0619238	0.0466629	SLC25A13/SLC6A13/ATP1A2/SLC1A3/P2RX7/HRH3/SLC38A7/SLC17A7/SLC1A6/APBA1/RAB3GAP1/SLC25A12/SLC1A4/KMO/GIPC1/SLC6A6/PER2/SLC38A2/STXBP1/SLC3A1/SNCA/ITGB1/SLC7A11/ADORA1/AVPR1A/ARL6IP1/TRH/LRRC8D/SLC25A22/KCNJ10/CLN8/GRM7	32	0.492308
GO:0015804	BP	GO:0015804	neutral amino acid transport	27/6492	53/18903	0.00930623	0.0619837	0.046708	SLC25A13/SLC6A7/SLC38A5/SLC7A9/LLGL2/SLC1A3/SLC38A7/SLC1A6/SLC38A1/SLC25A12/SLC1A4/RGS2/SLC6A6/SLC38A2/SLC3A1/SLC38A6/SLC43A1/SFXN2/MFSD12/SLC6A20/SFXN1/SLC3A2/SLC6A19/SLC38A9/SLC38A3/SLC6A9/SLC6A17	27	0.509434
GO:0043122	BP	GO:0043122	regulation of I-kappaB kinase/NF-kappaB signaling	106/6492	255/18903	0.00931336	0.0619837	0.046708	MAP3K14/CX3CL1/FYN/PPP5C/ZMYND11/ATP2C1/TAB2/TRAF1/SPHK2/RORA/TFRC/TRAF4/MID2/TRAF5/FKBP1A/ESR1/TMEM101/TREM2/SIRT1/ABL1/HMOX1/TRADD/PYCARD/RIPK2/NFKBIB/LTBR/GAPDH/GOLT1B/ECT2/TFG/IL1A/STAT1/ASH1L/WLS/GPR89A/TNFAIP3/TNFSF11/TRIM25/WDR83/UNC5CL/RBCK1/IRF3/TRAF2/TICAM1/AJUBA/BST2/EDA2R/HTR2B/DAB2IP/TLR4/MAPKBP1/PELI2/BCL10/ECM1/ANGPT1/SLC35B2/TMED4/EDA/PINK1/S100B/NLRX1/SQSTM1/SHISA5/TLR3/PRKCB/NLR…	106	0.415686
GO:0048659	BP	GO:0048659	smooth muscle cell proliferation	77/6492	179/18903	0.00951316	0.063216	0.0476366	CX3CL1/IGF1/ELN/CYBA/FOXJ2/PTGS2/NOTCH3/MEF2C/MMP2/JAK2/HMOX1/PDGFB/MMP9/FGF9/VIPR2/OGN/BMPR1A/PPARGC1A/IFNG/SOD2/HBEGF/NPR3/FOXP1/TACR1/STAT1/IGFBP5/ID2/MEF2D/MFN2/TNFAIP3/NR4A3/TGFB3/CDKN1A/EREG/BMP2/CNN1/DNMT1/HTR1B/IL6/TLR4/THBS1/FGF2/TPM1/MYOCD/VIP/IGFBP3/PDCD4/ADAMTS1/IL6R/DDR2/TGFBR2/TERT/GPER1/NOS3/RBPMS2/IL13/NPR1/PDGFD/S1PR1/APLN/P2RY6/PTEN/EFEMP2/TRIB1/JUN/CTNNBIP1/IRAK1/PRKG1/APOD/SRC…	77	0.430168
GO:0030279	BP	GO:0030279	negative regulation of ossification	21/6492	39/18903	0.00955054	0.063216	0.0476366	MEF2C/SMAD7/GATA1/SFRP1/DKK1/MDK/SRGN/SOX9/TMEM53/TPH1/TRPM4/KREMEN2/CHSY1/LRP4/ECM1/AHSG/GREM1/SOST/LTBP3/BCL2/ENPP1	21	0.538462
GO:0046329	BP	GO:0046329	negative regulation of JNK cascade	21/6492	39/18903	0.00955054	0.063216	0.0476366	PAFAH1B1/ZMYND11/CYLD/SFRP1/AMBP/DUSP3/HIPK3/MAPK8IP1/PRMT1/GPS2/MEN1/MARVELD3/NCOR1/SFRP2/PDCD4/PINK1/DUSP19/DACT1/PER1/AIDA/ZNF675	21	0.538462
GO:0010677	BP	GO:0010677	negative regulation of cellular carbohydrate metabolic process	24/6492	46/18903	0.00959022	0.063216	0.0476366	CRY1/HDAC4/SIRT6/C1QTNF3/GCKR/GIT1/PASK/LEPR/FOXA2/CBFA2T3/NCOR1/SIK1/SOGA1/SERPINA12/MIDN/DDIT4/STAT3/MST1/CLK2/PGP/PPARA/ENPP1/ACTN3/INS	24	0.521739
GO:0021517	BP	GO:0021517	ventral spinal cord development	24/6492	46/18903	0.00959022	0.063216	0.0476366	DMRT3/GLI2/LHX3/LHX4/SOX4/NKX2-2/MNX1/LBX1/FOXN4/ABT1/VLDLR/LRP8/ISL2/TBX20/SHH/GBX1/HOXC10/CLN8/PTCH1/DYNC2H1/RELN/GIGYF2/DCTN1/LHX1	24	0.521739
GO:2000273	BP	GO:2000273	positive regulation of signaling receptor activity	24/6492	46/18903	0.00959022	0.063216	0.0476366	CACNG4/JAK2/NEURL1/CCL2/AREG/IFNG/RWDD1/HBEGF/EREG/EPHB2/ITGB1/ADRA2A/ADAM17/PINK1/IFNGR2/TGFA/ADORA1/GREM1/ADRB2/BTC/RELN/NLGN3/ARC/ADRA2B	24	0.521739
GO:0030193	BP	GO:0030193	regulation of blood coagulation	34/6492	70/18903	0.00963794	0.063216	0.0476366	ENPP4/TFPI/PLAUR/FAP/CPB2/APOH/PDGFB/CAV1/KNG1/HRG/PROC/NFE2L2/F3/SERPINC1/PLAU/FOXA2/F12/EPHB2/PDGFRA/THBS1/EMILIN1/UBASH3B/USF1/NOS3/FGG/FGA/FGB/CD34/ANO6/F2/F2R/PROS1/PRKG1/SERPINB2	34	0.485714
GO:0002523	BP	GO:0002523	leukocyte migration involved in inflammatory response	12/6492	19/18903	0.00965411	0.063216	0.0476366	CX3CL1/SELE/MDK/CCR6/SLAMF1/LBP/S100A8/ADAM8/SLAMF8/JAM3/FUT7/ELANE	12	0.631579
GO:0009148	BP	GO:0009148	pyrimidine nucleoside triphosphate biosynthetic process	12/6492	19/18903	0.00965411	0.063216	0.0476366	NME2/CAD/NME4/NME5/CMPK2/UCK2/DTYMK/NME6/TYMS/NME9/UCKL1/NME1	12	0.631579
GO:0010738	BP	GO:0010738	regulation of protein kinase A signaling	12/6492	19/18903	0.00965411	0.063216	0.0476366	CALCR/AKAP7/RAMP3/AKAP12/AKAP6/SPATC1L/ADRB2/FSHR/LRRK2/PJA2/MIF/MC1R	12	0.631579
GO:0072074	BP	GO:0072074	kidney mesenchyme development	12/6492	19/18903	0.00965411	0.063216	0.0476366	PAX2/SIX4/STAT1/TCF21/PKD2/SIX1/MYC/SMAD4/OSR1/SHH/WT1/FOXD1	12	0.631579
GO:0072087	BP	GO:0072087	renal vesicle development	12/6492	19/18903	0.00965411	0.063216	0.0476366	SOX8/PAX2/SALL1/STAT1/SOX9/PAX8/LIF/OSR1/KIF26B/GREM1/GDNF/LHX1	12	0.631579
GO:0086014	BP	GO:0086014	atrial cardiac muscle cell action potential	12/6492	19/18903	0.00965411	0.063216	0.0476366	KCNN2/NUP155/KCNA5/TRPM4/ANK2/CACNA1C/KCNJ3/CACNB2/SCN3B/GJC1/FLNA/RYR2	12	0.631579
GO:0086026	BP	GO:0086026	atrial cardiac muscle cell to AV node cell signaling	12/6492	19/18903	0.00965411	0.063216	0.0476366	KCNN2/NUP155/KCNA5/TRPM4/ANK2/CACNA1C/KCNJ3/CACNB2/SCN3B/GJC1/FLNA/RYR2	12	0.631579
GO:0086066	BP	GO:0086066	atrial cardiac muscle cell to AV node cell communication	12/6492	19/18903	0.00965411	0.063216	0.0476366	KCNN2/NUP155/KCNA5/TRPM4/ANK2/CACNA1C/KCNJ3/CACNB2/SCN3B/GJC1/FLNA/RYR2	12	0.631579
[truncated: 1,238 more rows]

## Sheet: KEGG
	ID	Description	GeneRatio	BgRatio	pvalue	p.adjust	qvalue	geneID	Count
[truncated: 341 more rows]
