# Supplementary material
Source: Research Square preprint supplement (doi:10.21203/rs.3.rs-9388494/v1)
Supplement: Supplementary file 6 [file e79d84c2c55906696783ee13.xlsx]

## Sheet: AAMRGs
genes
AADAT
AANAT
AASS
ACAD8
ACADSB
ACAT1
ACMSD
ADI1
ADO
AFMID
AGMAT
AGXT
AGXT2
AHCY
AIMP1
AIMP2
ALDH18A1
ALDH4A1
ALDH6A1
ALDH7A1
ALDH9A1
AMD1
AMDHD1
AMT
APIP
ARG1
ARG2
ASL
ASMT
ASNS
ASPA
ASPG
ASRGL1
ASS1
AUH
AZIN1
AZIN2
BBOX1
BCAT1
BCAT2
BCKDHA
BCKDHB
BCKDK
BHMT
BHMT2
CARNMT1
CARNS1
CBS
CDO1
CGA
CHDH
CKB
CKM
CKMT1A
CKMT1B
CKMT2
CPS1
CRYM
CSAD
CTH
DAO
DARS1
DBH
DBT
DCT
DDC
DDO
DHTKD1
DIO1
DIO2
DIO3
DLAT
DLD
DLST
DMGDH
DUOX1
DUOX2
ECHS1
EEF1E1
EEFSEC
ENOPH1
EPRS1
ETHE1
FAH
FAU
FMO1
FOLH1
FTCD
GADL1
GAMT
GATM
GCAT
GCDH
GCSH
GLDC
GLS
GLS2
GLUD1
GLUD2
GLUL
GNMT
GOT1
GOT2
GPT
GPT2
GRHPR
GSR
GSTZ1
HAAO
HAL
HAO1
HDC
HGD
HIBADH
HIBCH
HNMT
HOGA1
HPD
HSD17B10
HYKK
IARS1
IDO1
IDO2
IL4I1
INMT
IVD
IYD
KARS1
KMO
KYAT1
KYAT3
KYNU
LARS1
LIAS
LIPT1
LIPT2
MARS1
MAT1A
MCCC1
MCCC2
MPST
MRI1
MTAP
MTR
MTRR
NAALAD2
NAGS
NAT8L
NDUFAB1
NMRAL1
NNMT
NQO1
OAT
OAZ1
OAZ2
OAZ3
OCA2
ODC1
OGDH
OTC
PAH
PAOX
PAPSS1
PAPSS2
PCBD1
PDHA1
PDHA2
PDHB
PDHX
PHGDH
PHYKPL
PIPOX
PNMT
PPM1K
PRODH
PRODH2
PSAT1
PSMA1
PSMA2
PSMA3
PSMA4
PSMA5
PSMA6
PSMA7
PSMA8
PSMB1
PSMB10
PSMB11
PSMB2
PSMB3
PSMB4
PSMB5
PSMB6
PSMB7
PSMB8
PSMB9
PSMC1
PSMC2
PSMC3
PSMC4
PSMC5
PSMC6
PSMD1
PSMD10
PSMD11
PSMD12
PSMD13
PSMD14
PSMD2
PSMD3
PSMD4
PSMD5
PSMD6
PSMD7
PSMD8
PSMD9
PSME1
PSME2
PSME3
PSME4
PSMF1
PSPH
PSTK
PXMP2
PYCR1
PYCR2
PYCR3
QARS1
QDPR
RARS1
RIDA
RIMKLA
RIMKLB
RPL10
RPL10A
RPL10L
RPL11
RPL12
RPL13
RPL13A
RPL14
RPL15
RPL17
RPL18
RPL18A
RPL19
RPL21
RPL22
RPL22L1
RPL23
RPL23A
RPL24
RPL26
RPL26L1
RPL27
RPL27A
RPL28
RPL29
RPL3
RPL30
RPL31
RPL32
RPL34
RPL35
RPL35A
RPL36
RPL36A
RPL36AL
RPL37
RPL37A
RPL38
RPL39
RPL39L
RPL3L
RPL4
RPL41
RPL5
RPL6
RPL7
RPL7A
RPL8
RPL9
RPLP0
RPLP1
RPLP2
RPS10
RPS11
RPS12
RPS13
RPS14
RPS15
RPS15A
RPS16
RPS17
RPS18
RPS19
RPS2
RPS20
RPS21
RPS23
RPS24
RPS25
RPS26
RPS27
RPS27A
RPS27L
RPS28
RPS29
RPS3
RPS3A
RPS4X
RPS4Y1
RPS4Y2
RPS5
RPS6
RPS7
RPS8
RPS9
RPSA
SARDH
SARS1
SAT1
SCLY
SDS
SDSL
SECISBP2
SEM1
SEPHS2
SEPSECS
SERINC1
SERINC2
SERINC3
SERINC4
SERINC5
SHMT1
SLC25A10
SLC25A12
SLC25A13
SLC25A15
SLC25A2
SLC25A21
SLC25A44
SLC36A4
SLC3A2
SLC44A1
SLC45A2
SLC5A5
SLC6A11
SLC6A12
SLC6A7
SLC6A8
SLC7A5
SMOX
SMS
SQOR
SRM
SRR
SUOX
TAT
TDO2
TH
TMLHE
TPH1
TPH2
TPO
TSHB
TST
TSTD1
TXN2
TXNRD1
TYR
TYRP1
UBA52
UROC1

## Sheet: FRGs
genes
RPL8
IREB2
ATP5MC3
CS
EMC2
ACSF2
NOX1
CYBB
NOX3
NOX4
NOX5
DUOX1
DUOX2
G6PD
PGD
VDAC2
TP53
ACSL4
LPCAT3
NRAS
KRAS
HRAS
CARS1
TP53
KEAP1
HMOX1
TP53
ATG5
ATG7
NCOA4
TF
ALOX5
ALOX12
ALOX12B
ALOX15
ALOX15B
ALOXE3
PHKG2
NCOA4
ACSL4
TP53
SAT1
ALOX15
ACSL4
EGFR
NOX4
MAPK3
MAPK1
ACSL4
ZEB1
KEAP1
DPP4
ALOX15
ALOX12
CDKN2A
PEBP1
SOCS1
CDO1
MYB
HMOX1
SLC1A5
CHAC1
LINC00472
NOX4
GOT1
BECN1
PRKAA2
PRKAA1
ELAVL1
BAP1
ABCC1
ACSL4
MIR6852
ACVR1B
TGFBR1
BAP1
ALOX12
ACSL4
HMOX1
IFNG
ANO6
HMGB1
TNFAIP3
ATF3
ATM
YY1AP1
EGLN2
MIOX
TAFAZZIN
MTDH
IDH1
TAFAZZIN
BECN1
FBXW7
PANX1
DNAJB6
ACSL4
LONP1
CD82
IL1B
POR
CYB5R1
ELOVL5
FADS1
FBXW7
PTEN
IL6
miR-182-5p
miR-378a-3p
CTSB
ACSL4
ATF4
LINC00618
IREB2
MT1DP
ACSL4
PEX10
KEAP1
AGPAT3
PEX12
CHP1
GPAT4
BRPF1
OSBPL9
INTS2
MMD
CYP4F8
MLLT1
TTPA
GRIA3
EPT1
POM121L12
LIG3
AEBP2
AGPS
CDCA3
PEX2
LPCAT3
PEX6
TIMM9
DCAF7
LCE2C
FAR1
PHF21A
SMAD7
LYRM1
AMN
PEX3
MTCH1
ZEB1
SIRT1
ACADSB
PVT1
hsa_circ_0008367
NCOA4
GSK3B
MAPK8
BRD7
TP53
SLC25A28
ACSL4
SLC11A2
ZFAS1
SLC38A1
TSC1
PEBP1
TGFB1
SNCA
SIRT3
PRKAA2
TFRC
CGAS
STING1
HDDC3
MIR761
MDM2
MDM4
POR
MIR214
DLD
LONP1
ACSL4
DNAJB6
WWTR1
ATM
PRKCA
TP53
IFNG
SMPD1
MYCN
SLC11A2
IFNA1
IFNA2
IFNA4
IFNA5
IFNA6
IFNA7
IFNA8
IFNA10
IFNA13
IFNA14
IFNA16
IFNA17
IFNA21
SMG9
ACSL4
TLR4
IL6
ATF3
HMOX1
PAQR3
MICU1
TOR2A
MIR375
SIRT3
CircKDM4C
MIR324
QSOX1
CLTRN
KLF2
MIR5096
H19
ELAVL1
YTHDC2
DDR2
SLC39A7
TRIM46
ACSL1
KDM5A
HMOX1
CYGB
GSTZ1
TP53
ACO1
GJA1
SLC7A11
CIRBP
FAR1
circPSEN1
STING1
YAP1
TRIM26
YAP1
NDRG1
MIR302A
ASMTL-AS1
FADS2
PIEZO1
LIFR
PTPN6
ADAM23
ARHGEF26-AS1
CPEB1
MIR15A
KDM6B
GSK3B
METTL14
CHAC1
MIB1
KDM5C
ACSL4
CCDC6
ATF3
IREB2
MIR539
PTGS2
CHAC1
FTH1
SLC7A11
GPX4
AKR1C1
AKR1C2
AKR1C3
GPX4
RB1
HSPB1
HSF1
SLC7A11
SLC7A11
NFE2L2
SQSTM1
NQO1
HMOX1
FTH1
MUC1
MT1G
NFE2L2
SLC40A1
SLC7A11
GPX4
SLC7A11
CISD1
SLC7A11
GPX4
HSPA5
ATF4
GPX4
ATF4
NFE2L2
TP53
SLC7A11
HELLS
SCD
FADS2
SRC
STAT3
NFE2L2
PML
NFS1
TP63
SLC7A11
TP53
CDKN1A
MIR137
GPX4
VDAC2
FH
CISD2
SLC40A1
MIR9-1
MIR9-2
MIR9-3
CBS
NFE2L2
SQSTM1
GPX4
ISCU
FTH1
ACSL3
OTUB1
CD44
LINC00336
STAT3
BRD4
PRDX6
MIR17
SCD
SESN2
NF2
ARNTL
HIF1A
JUN
CA9
HSPA5
TMBIM4
HSPA5
PLIN2
AIFM2
AIFM2
LAMP2
ZFP36
GPX4
PROM2
CHMP5
CHMP6
AKR1C1
AKR1C2
AKR1C3
CBS
NFE2L2
CAV1
GCH1
SIRT3
PIR
GCLC
HCAR1
SLC16A1
RRM2
SCD
NR4A1
PIK3CA
RPTOR
SREBF1
SREBF2
FZD7
P4HB
BCAT2
HSF1
PLA2G6
MIR424
PARK7
FXN
SUV39H1
ATF2
CDKN1A
STK11
FNDC5
CircIL4R
CDH1
NFE2L2
MIR214
NEDD4L
SQSTM1
TF
FTMT
BRD2
BRD3
BRD4
BRDT
SCD
SLC7A11
DECR1
NFE2L2
SLC7A11
GLRX5
GPX4
NCOA3
NR5A2
GPX4
MTOR
PANX2
RHEBP1
TFAP2A
CP
SLC7A11
ARF6
GDF15
ABHD12
TFAM
KDM3B
RNF113A
PARK7
AHCY
FXN
circ-TTBK2
MIR522
IDH2
PPARA
SIAH2
PRKAA2
NEDD4
AIFM2
PRDX1
AR
CBS
NFE2L2
CHMP5
CHMP6
ZFP36
LAMP2
MTF1
COPZ1
NUPR1
USP35
HSF1
PROM2
PLA2G6
HIF1A
NEAT1
RRM2
SLC7A11
PARP1
PARP2
PARP3
PARP4
PARP6
PARP8
PARP9
PARP10
PARP11
PARP12
PARP14
PARP15
PARP16
PDSS2
PLA2G6
OIP5-AS1
MIR190A
CREB1
CREB3
CREB5
GOT1
MIR130B
BEX1
FABP4
AKT1S1
MLST8
MTOR
RPTOR
CDH1
SIRT1
TYRO3
SIRT6
TMSB4X
TMSB4Y
KIF20A
ECH1
circRHOT1
ETV4
MEG8
VCP
circ_0007142
RBMS1
KDM4A
CBS
MGST1
circKIF4A
miR-7-5p
circ_0067934
MPC1
CAMKK2
SOX2
SRSF9
MIR4443
MIR27A
MIR670
MEF2C
NF2
CDH1
HSPB1
EZH2
PEDS1
CDC25A
G6PD
SRSF9
CAV1
CISD2
LCN2
TRIB2
DHODH
SLC7A11
MIR545
OTUB1
PDK4
CircPVT1
circDTL
IL6
PTPN18
FTH1
FTH1
FTL
LCN2
ABCC5
CISD3
LCN2
FURIN
circRHBG
GALNT14
KLHDC3
LINC01833
circGFRA1
GSTM1
circ0097009
TMEM161B-DT
circEPSTI1
MIR18A
RARRES2
USP11
