# Supplementary material
Source: Research Square preprint supplement (doi:10.21203/rs.3.rs-9388494/v1)
Supplement: Supplementary file 7 [file ecfa41e2074298f6defb97d1.xlsx]

## Sheet: Table S7
	drug	.y.	group1	group2	n1	n2	statistic	p	p.adj	p.signif
1	AGI.6780_1634	Score	high	low	196	195	16289	0.0116	0.0358875	*
2	AMG.319_2045	Score	high	low	196	195	22167	0.00623	0.0219848275862069	**
3	AZ960_1250	Score	high	low	196	195	24154	6.37e-06	9.009e-05	****
4	AZD3759_1915	Score	high	low	196	195	22973	0.000547	0.0030855	***
5	AZD4547_1786	Score	high	low	196	195	13860	2.63e-06	4.3395e-05	****
6	AZD5363_1916	Score	high	low	196	195	21957	0.0108	0.0348857142857143	*
7	AZD5438_1401	Score	high	low	196	195	21952	0.011	0.0348857142857143	*
8	AZD5582_1617	Score	high	low	196	195	21648	0.0231	0.0618081081081081	*
9	AZD5991_1720	Score	high	low	196	195	15502	0.00124	0.00570976744186047	**
10	AZD7762_1022	Score	high	low	196	195	23364	0.000141	0.001034	***
11	AZD8186_1918	Score	high	low	196	195	23479	9.24e-05	0.0007623	****
12	Alisertib_1051	Score	high	low	196	195	23282	0.000189	0.00129041379310345	***
13	BDP.00009066_1866	Score	high	low	196	195	22693	0.00135	0.00594	**
14	BMS.536924_1091	Score	high	low	196	195	24917	2.03e-07	6.699e-06	****
15	BMS.754807_2171	Score	high	low	196	195	22190	0.00585	0.02106	**
16	BPD.00008900_1998	Score	high	low	196	195	22637	0.0016	0.00674042553191489	**
17	Buparlisib_1873	Score	high	low	196	195	21815	0.0155	0.0458059701492537	*
18	CZC24832_1615	Score	high	low	196	195	22155	0.00644	0.0219848275862069	**
19	Camptothecin_1003	Score	high	low	196	195	21319	0.0481	0.114744578313253	*
20	Dabrafenib_1373	Score	high	low	196	195	22100	0.00746	0.0250352542372881	**
21	Dactinomycin_1911	Score	high	low	196	195	22832	0.000867	0.00429165	***
22	Daporinad_1248	Score	high	low	196	195	15469	0.00112	0.00528	**
23	Dasatinib_1079	Score	high	low	196	195	25961	8.74e-10	8.6526e-08	****
24	Dihydrorotenone_1827	Score	high	low	196	195	13726	1.45e-06	2.871e-05	****
25	Dinaciclib_1180	Score	high	low	196	195	21305	0.0495	0.116678571428571	*
26	Docetaxel_1007	Score	high	low	196	195	23323	0.000163	0.00115264285714286	***
27	Docetaxel_1819	Score	high	low	196	195	23014	0.000477	0.00282441176470588	***
28	Doramapimod_1042	Score	high	low	196	195	15519	0.00131	0.005895	**
29	ERK_2440_1713	Score	high	low	196	195	23210	0.000244	0.00155845161290323	***
30	Entospletinib_1630	Score	high	low	196	195	23616	5.53e-05	0.0004977	****
31	Epirubicin_1511	Score	high	low	196	195	23767	3.08e-05	0.000320968421052632	****
32	Erlotinib_1168	Score	high	low	196	195	22934	0.000622	0.00332854054054054	***
33	Fludarabine_1813	Score	high	low	196	195	23510	8.24e-05	0.00070935652173913	****
34	Foretinib_2040	Score	high	low	196	195	23009	0.000485	0.00282441176470588	***
35	GSK2606414_1618	Score	high	low	196	195	22010	0.00946	0.031218	**
36	GSK591_2110	Score	high	low	196	195	21877	0.0133	0.0405138461538462	*
37	Gefitinib_1010	Score	high	low	196	195	22360	0.00364	0.0144144	**
38	I.BET.762_1624	Score	high	low	196	195	24639	7.51e-07	2.12425714285714e-05	****
39	IGF1R_3801_1738	Score	high	low	196	195	24175	5.83e-06	8.87953846153846e-05	****
40	Irinotecan_1088	Score	high	low	196	195	21428	0.0381	0.0979714285714286	*
41	KRAS..G12C..Inhibitor.12_1855	Score	high	low	196	195	15148	0.000392	0.0024255	***
42	KU.55933_1030	Score	high	low	196	195	24555	1.1e-06	2.618e-05	****
43	LGK974_1598	Score	high	low	196	195	14527	4.11e-05	0.00040689	****
44	LJI308_2107	Score	high	low	196	195	23231	0.000226	0.0014916	***
45	Leflunomide_1578	Score	high	low	196	195	16552	0.0221	0.0599424657534247	*
46	Luminespib_1559	Score	high	low	196	195	24962	1.63e-07	6.4548e-06	****
47	MIM1_1996	Score	high	low	196	195	21678	0.0216	0.0594	*
48	MK.2206_1053	Score	high	low	196	195	16382	0.0146	0.0438	*
49	MK.8776_2046	Score	high	low	196	195	21359	0.0442	0.108044444444444	*
50	ML323_1629	Score	high	low	196	195	15317	0.000688	0.00349292307692308	***
51	NU7441_1038	Score	high	low	196	195	24367	2.55e-06	4.3395e-05	****
52	NVP.ADW742_1932	Score	high	low	196	195	22292	0.00441	0.0171211764705882	**
53	Navitoclax_1011	Score	high	low	196	195	15399	0.000898	0.00433668292682927	***
54	Nelarabine_1814	Score	high	low	196	195	21359	0.0442	0.108044444444444	*
55	Nilotinib_1013	Score	high	low	196	195	16891	0.0471	0.113729268292683	*
56	OF.1_1853	Score	high	low	196	195	14256	1.4e-05	0.000154	****
57	OSI.027_1594	Score	high	low	196	195	13682	1.19e-06	2.618e-05	****
58	OTX015_1626	Score	high	low	196	195	24108	7.73e-06	0.000102036	****
59	Obatoclax.Mesylate_1068	Score	high	low	196	195	25126	7.3e-08	4.15305e-06	****
60	Olaparib_1017	Score	high	low	196	195	21371	0.0431	0.108022784810127	*
61	P22077_1933	Score	high	low	196	195	15255	0.000561	0.0030855	***
62	PD0325901_1060	Score	high	low	196	195	22434	0.00294	0.01188	**
63	PF.4708671_1129	Score	high	low	196	195	16456	0.0176	0.050504347826087	*
64	PFI3_1620	Score	high	low	196	195	21949	0.0111	0.0348857142857143	*
65	PLX.4720_1036	Score	high	low	196	195	23414	0.000117	0.00092664	***
66	RO.3306_1052	Score	high	low	196	195	21385	0.0418	0.106107692307692	*
67	RVX.208_1625	Score	high	low	196	195	23656	4.74e-05	0.000446914285714286	****
68	Rapamycin_1084	Score	high	low	196	195	15942	0.00459	0.0174773076923077	**
69	SB216763_1025	Score	high	low	196	195	24080	8.69e-06	0.000107539	****
70	Sapitinib_1549	Score	high	low	196	195	21728	0.0192	0.053543661971831	*
71	Sepantronium.bromide_1941	Score	high	low	196	195	21756	0.0179	0.0506314285714286	*
72	Sorafenib_1085	Score	high	low	196	195	16025	0.00577	0.02106	**
73	Staurosporine_1034	Score	high	low	196	195	25098	8.39e-08	4.15305e-06	****
74	TAF1_5496_1732	Score	high	low	196	195	11909	1.16e-10	2.2968e-08	****
75	Talazoparib_1259	Score	high	low	196	195	22433	0.00294	0.01188	**
76	Trametinib_1372	Score	high	low	196	195	21797	0.0162	0.0471705882352941	*
77	UMI.77_1939	Score	high	low	196	195	23385	0.000131	0.000997615384615385	***
78	Ulixertinib_1908	Score	high	low	196	195	21478	0.0341	0.0888394736842105	*
79	Uprosertib_1553	Score	high	low	196	195	16699	0.031	0.08184	*
80	Vinblastine_1004	Score	high	low	196	195	22156	0.00642	0.0219848275862069	**
81	WIKI4_1940	Score	high	low	196	195	22919	0.000653	0.00340247368421053	***
82	WZ4003_1614	Score	high	low	196	195	24035	1.05e-05	0.000122294117647059	****
83	Wnt.C59_1622	Score	high	low	196	195	15992	0.00527	0.0196879245283019	**
84	YK.4.279_1239	Score	high	low	196	195	22637	0.0016	0.00674042553191489	**
